# Supplementary material
Source: MDPI journal article supplement (https://www.mdpi.com/2075-163X/10/6/527)
Supplement: s1 [file [Kim]TableS1_R1.xlsx]

## Sheet: PlotDat2
Source sheet	YW2	0.2	1062.42	1	1064	12	0.85	1052
Plot name	Average1	19.8	1062.42	2	1053	11	1.15	1052
Plot Type	15			3	1068	12	1.15	1076
1st free col	8			4	1059	12	0.85	1076
Sigma Level	2			5	1066	12	0.85	1052
Absolute Errs	TRUE			6	1058	12	ErrBox	ErrBox
Symbol Type	1			7	1067	10	1.85	1042
Inverse Plot	FALSE			8	1066	12	2.15	1042
Color Plot	TRUE			9	1068	11	2.15	1064
3D plot	FALSE			10	1053	11	1.85	1064
Linear	FALSE			11	1072	13	1.85	1042
Data Range	X88:Y106			12	1062	11	ErrBox	ErrBox
Filled Symbols	TRUE			13	1061	10	2.85	1056
ConcAge	FALSE			14	1066	12	3.15	1056
ConcSwap	FALSE			15	1061	10	3.15	1080
1st Symbol-row	1			16	1056.7	9.4	2.85	1080
				17	1056	11	2.85	1056
				18	1075	11	ErrBox	ErrBox
				19	1060	12	3.85	1047
				IsoLine	IsoLine	IsoLine	4.15	1047
							4.15	1071
							3.85	1071
							3.85	1047
							ErrBox	ErrBox
							4.85	1054
							5.15	1054
							5.15	1078
							4.85	1078
							4.85	1054
							ErrBox	ErrBox
							5.85	1046
							6.15	1046
							6.15	1070
							5.85	1070
							5.85	1046
							ErrBox	ErrBox
							6.85	1057
							7.15	1057
							7.15	1077
							6.85	1077
							6.85	1057
							ErrBox	ErrBox
							7.85	1054
							8.15	1054
							8.15	1078
							7.85	1078
							7.85	1054
							ErrBox	ErrBox
							8.85	1057
							9.15	1057
							9.15	1079
							8.85	1079
							8.85	1057
							ErrBox	ErrBox
							9.85	1042
							10.15	1042
							10.15	1064
							9.85	1064
							9.85	1042
							ErrBox	ErrBox
							10.85	1059
							11.15	1059
							11.15	1085
							10.85	1085
							10.85	1059
							ErrBox	ErrBox
							11.85	1051
							12.15	1051
							12.15	1073
							11.85	1073
							11.85	1051
							ErrBox	ErrBox
							12.85	1051
							13.15	1051
							13.15	1071
							12.85	1071
							12.85	1051
							ErrBox	ErrBox
							13.85	1054
							14.15	1054
							14.15	1078
							13.85	1078
							13.85	1054
							ErrBox	ErrBox
							14.85	1051
							15.15	1051
							15.15	1071
							14.85	1071
							14.85	1051
							ErrBox	ErrBox
							15.85	1047.3
							16.15	1047.3
							16.15	1066.1
							15.85	1066.1
							15.85	1047.3
							ErrBox	ErrBox
							16.85	1045
							17.15	1045
							17.15	1067
							16.85	1067
							16.85	1045
							ErrBox	ErrBox
							17.85	1064
							18.15	1064
							18.15	1086
							17.85	1086
							17.85	1064
							ErrBox	ErrBox
							18.85	1048
							19.15	1048
							19.15	1072
							18.85	1072
							18.85	1048
							ErrBox	ErrBox

## Sheet: PlotDat4
Source sheet	YW2	18.4877	0.05319	17.4	0.0537414	19.5241	0.0528416	18.7136	0.05319	18.8068	0.05295	18.7802	0.05323	18.8531	0.05277	18.7375	0.05304	18.7488	0.05291	18.8137	0.05353	18.8624	0.05323	18.6624	0.053087
Plot name	Concordia2	18.5254	0.05295	17.4381	0.0537231	19.4005	0.0528881	18.7093	0.0532879	18.8014	0.0530383	18.7755	0.0533207	18.848	0.0528727	18.7336	0.0531498	18.7452	0.0529912	18.8103	0.0536374	18.8575	0.0533398	18.6605	0.0531293
Plot Type	1	18.5323	0.05323	17.5	0.0536937	19.2785	0.0529347	18.6964	0.053382	18.7854	0.0531233	18.7614	0.053408	18.8331	0.0529714	18.7222	0.0532554	18.7346	0.0530692	18.8004	0.0537408	18.843	0.0534454	18.6551	0.0531701
1st free col	27	18.5908	0.05277	17.5623	0.0536644	19.1579	0.0529814	18.6755	0.0534688	18.7594	0.0532016	18.7385	0.0534884	18.8089	0.0530624	18.7035	0.0533528	18.7175	0.0531412	18.7843	0.053836	18.8195	0.0535428	18.6462	0.0532077
Sigma Level	2	18.5357	0.05304	17.625	0.053635	19.0389	0.0530281	18.6474	0.0535448	18.7244	0.0532702	18.7076	0.0535589	18.7763	0.0531421	18.6784	0.0534381	18.6944	0.0532042	18.7626	0.0539194	18.7879	0.0536281	18.6342	0.0532406
Absolute Errs	TRUE	18.5632	0.05291	17.6881	0.0536056	18.9212	0.0530749	18.6132	0.0536072	18.6817	0.0533265	18.67	0.0536167	18.7365	0.0532076	18.6478	0.0535081	18.6663	0.053256	18.7362	0.0539879	18.7494	0.0536981	18.6196	0.0532676
Symbol Type	1	18.6393	0.05353	17.7517	0.0535763	18.805	0.0531217	18.5742	0.0536536	18.6331	0.0533684	18.6272	0.0536597	18.6912	0.0532562	18.6129	0.0535601	18.6342	0.0532944	18.706	0.0540388	18.7054	0.0537501	18.6029	0.0532877
Inverse Plot	TRUE	18.6081	0.05323	17.8158	0.053547	18.6901	0.0531686	18.5318	0.0536821	18.5803	0.0533941	18.5806	0.0536861	18.642	0.0532862	18.5751	0.0535922	18.5994	0.0533181	18.6733	0.0540702	18.6577	0.0537822	18.5848	0.0533
Color Plot	TRUE	IsoLine	IsoLine	17.8803	0.0535178	18.5766	0.0532156	18.4877	0.0536918	18.5254	0.0534028	18.5323	0.0536951	18.5908	0.0532963	18.5357	0.053603	18.5632	0.0533261	18.6393	0.0540807	18.6081	0.053793	18.566	0.0533042
3D plot	FALSE			17.9452	0.0534885	18.4644	0.0532626	18.4436	0.0536821	18.4705	0.0533941	18.4839	0.0536861	18.5397	0.0532862	18.4963	0.0535922	18.527	0.0533181	18.6053	0.0540702	18.5585	0.0537822	18.5472	0.0533
Linear	FALSE			18.0106	0.0534593	18.3536	0.0533097	18.4013	0.0536536	18.4177	0.0533684	18.4373	0.0536597	18.4905	0.0532562	18.4584	0.0535601	18.4922	0.0532944	18.5726	0.0540388	18.5108	0.0537501	18.5291	0.0532877
Data Range	I79:L86			18.0765	0.0534301	18.244	0.0533568	18.3622	0.0536072	18.369	0.0533265	18.3945	0.0536167	18.4451	0.0532076	18.4235	0.0535081	18.4601	0.053256	18.5425	0.0539879	18.4668	0.0536981	18.5125	0.0532676
Filled Symbols	TRUE			18.1428	0.0534009	18.1357	0.053404	18.328	0.0535448	18.3264	0.0532702	18.3569	0.0535589	18.4054	0.0531421	18.393	0.0534381	18.432	0.0532042	18.5161	0.0539194	18.4283	0.0536281	18.4979	0.0532406
ConcAge	TRUE			18.2096	0.0533717	18.0287	0.0534512	18.2999	0.0534688	18.2914	0.0532016	18.326	0.0534884	18.3728	0.0530624	18.3679	0.0533528	18.4089	0.0531412	18.4944	0.053836	18.3967	0.0535428	18.4859	0.0532077
ConcSwap	FALSE			18.2769	0.0533426	17.9229	0.0534985	18.279	0.053382	18.2654	0.0531233	18.3031	0.053408	18.3485	0.0529714	18.3492	0.0532554	18.3918	0.0530692	18.4783	0.0537408	18.3732	0.0534454	18.477	0.0531701
1st Symbol-row	1			18.3447	0.0533135	17.8182	0.0535459	18.2662	0.0532879	18.2494	0.0530383	18.289	0.0533207	18.3336	0.0528727	18.3377	0.0531498	18.3812	0.0529912	18.4683	0.0536374	18.3587	0.0533398	18.4715	0.0531293
				18.413	0.0532844	17.7148	0.0535933	18.2618	0.05319	18.244	0.05295	18.2843	0.05323	18.3286	0.05277	18.3338	0.05304	18.3776	0.05291	18.465	0.05353	18.3538	0.05323	18.4697	0.053087
				18.4818	0.0532553	17.6125	0.0536408	18.2662	0.0530921	18.2494	0.0528617	18.289	0.0531393	18.3336	0.0526673	18.3377	0.0529302	18.3812	0.0528288	18.4683	0.0534226	18.3587	0.0531202	18.4715	0.0530446
				18.5511	0.0532262	17.5114	0.0536884	18.279	0.052998	18.2654	0.0527767	18.3031	0.053052	18.3485	0.0525686	18.3492	0.0528246	18.3918	0.0527508	18.4783	0.0533192	18.3732	0.0530146	18.477	0.0530038
				18.6208	0.0531972	IsoLine	IsoLine	18.2999	0.0529112	18.2914	0.0526984	18.326	0.0529716	18.3728	0.0524776	18.3679	0.0527272	18.4089	0.0526788	18.4944	0.053224	18.3967	0.0529172	18.4859	0.0529663
				18.6911	0.0531682			18.328	0.0528352	18.3264	0.0526298	18.3569	0.0529011	18.4054	0.0523979	18.393	0.0526419	18.432	0.0526158	18.5161	0.0531406	18.4283	0.0528319	18.4979	0.0529333
				18.762	0.0531392			18.3622	0.0527728	18.369	0.0525735	18.3945	0.0528433	18.4451	0.0523324	18.4235	0.0525719	18.4601	0.052564	18.5425	0.0530721	18.4668	0.0527619	18.5125	0.0529063
				18.8333	0.0531103			18.4013	0.0527264	18.4177	0.0525316	18.4373	0.0528003	18.4905	0.0522838	18.4584	0.0525199	18.4922	0.0525256	18.5726	0.0530212	18.5108	0.0527099	18.5291	0.0528862
				18.9052	0.0530813			18.4436	0.0526979	18.4705	0.0525059	18.4839	0.0527739	18.5397	0.0522538	18.4963	0.0524878	18.527	0.0525019	18.6053	0.0529898	18.5585	0.0526778	18.5472	0.0528739
				18.9776	0.0530524			18.4877	0.0526882	18.5254	0.0524972	18.5323	0.0527649	18.5908	0.0522437	18.5357	0.052477	18.5632	0.0524939	18.6393	0.0529793	18.6081	0.052667	18.566	0.0528697
				19.0505	0.0530235			18.5318	0.0526979	18.5803	0.0525059	18.5806	0.0527739	18.642	0.0522538	18.5751	0.0524878	18.5994	0.0525019	18.6733	0.0529898	18.6577	0.0526778	18.5848	0.0528739
				19.124	0.0529946			18.5742	0.0527264	18.6331	0.0525316	18.6272	0.0528003	18.6912	0.0522838	18.6129	0.0525199	18.6342	0.0525256	18.706	0.0530212	18.7054	0.0527099	18.6029	0.0528862
				19.1981	0.0529658			18.6132	0.0527728	18.6817	0.0525735	18.67	0.0528433	18.7365	0.0523324	18.6478	0.0525719	18.6663	0.052564	18.7362	0.0530721	18.7494	0.0527619	18.6196	0.0529063
				19.2727	0.0529369			18.6474	0.0528352	18.7244	0.0526298	18.7076	0.0529011	18.7763	0.0523979	18.6784	0.0526419	18.6944	0.0526158	18.7626	0.0531406	18.7879	0.0528319	18.6342	0.0529333
				19.3479	0.0529081			18.6755	0.0529112	18.7594	0.0526984	18.7385	0.0529716	18.8089	0.0524776	18.7035	0.0527272	18.7175	0.0526788	18.7843	0.053224	18.8195	0.0529172	18.6462	0.0529663
				19.4237	0.0528794			18.6964	0.052998	18.7854	0.0527767	18.7614	0.053052	18.8331	0.0525686	18.7222	0.0528246	18.7346	0.0527508	18.8004	0.0533192	18.843	0.0530146	18.6551	0.0530038
				19.5	0.0528506			18.7093	0.0530921	18.8014	0.0528617	18.7755	0.0531393	18.848	0.0526673	18.7336	0.0529302	18.7452	0.0528288	18.8103	0.0534226	18.8575	0.0531202	18.6605	0.0530446
				19.5	0.0528506			18.7136	0.05319	18.8068	0.05295	18.7802	0.05323	18.8531	0.05277	18.7375	0.05304	18.7488	0.05291	18.8137	0.05353	18.8624	0.05323	18.6624	0.053087
				IsoLine	IsoLine			ErrEll	ErrEll	ErrEll	ErrEll	ErrEll	ErrEll	ErrEll	ErrEll	ErrEll	ErrEll	ErrEll	ErrEll	ErrEll	ErrEll	ErrEll	ErrEll	ErrEll	ErrEll

## Sheet: PlotDat5
Source sheet	YW2	18.7371	0.05302	1.81737	0.2	31.7347	0.0501079	18.9305	0.05302	8.98329	0.10918	5.37432	0.11433	2.99682	0.11504	19.8046	0.05303	15.9085	0.1118	8.28501	0.11198	15.6041	0.055	4.90724	0.11412	7.27437	0.08781	3.00211	0.11579	12.4831	0.13	5.33755	0.1234	3.07512	0.11488	3.06547	0.11334	19.7063	0.05319	6.79147	0.11403	2.1896	0.16366	19.1576	0.05329	18.9913	0.05287	3.01899	0.11497
Plot name	Concordia3	8.56164	0.10918	1.81737	0.2	15.6212	0.0547005	18.9268	0.0531179	8.97519	0.10929	5.36984	0.114383	2.99511	0.115195	19.8	0.0531685	15.8796	0.112063	8.2819	0.11209	15.6008	0.0552053	4.90244	0.114242	7.27243	0.0878745	3.0012	0.115862	12.4736	0.133581	5.3358	0.123734	3.07305	0.115011	3.06396	0.113464	19.7032	0.0533142	6.78336	0.114111	2.18861	0.163834	19.1496	0.0535097	18.9864	0.0530156	3.01811	0.115039
Plot Type	1	5.14139	0.11433	1.89095	0.189352	10.2518	0.059901	18.9158	0.053212	8.95119	0.109395	5.35659	0.114433	2.99004	0.115344	19.7864	0.0533016	15.7943	0.112315	8.27271	0.112195	15.591	0.0554028	4.88824	0.114359	7.2667	0.0879365	2.99853	0.115931	12.4456	0.137025	5.33063	0.124056	3.06692	0.115138	3.05949	0.113584	19.6938	0.0534335	6.75934	0.114189	2.18568	0.164002	19.1258	0.0537209	18.9717	0.0531557	3.01553	0.115106
1st free col	159	2.90782	0.11504	1.96959	0.179352	7.56836	0.0657994	18.8979	0.0532988	8.91223	0.109493	5.33506	0.11448	2.98182	0.115482	19.7643	0.0534244	15.6558	0.112548	8.25778	0.112293	15.5751	0.0555848	4.86518	0.114467	7.25739	0.0879936	2.99418	0.115994	12.4001	0.140199	5.32222	0.124352	3.05696	0.115254	3.05222	0.113694	19.6787	0.0535436	6.72034	0.114261	2.18092	0.164156	19.0873	0.0539156	18.9479	0.0532848	3.01133	0.115167
Sigma Level	2	19.5656	0.05303	2.05383	0.169958	5.95934	0.0724996	18.8738	0.0533748	8.85979	0.109578	5.3061	0.11452	2.97075	0.115603	19.7346	0.0535319	15.4693	0.112752	8.2377	0.112378	15.5537	0.0557443	4.83414	0.114561	7.24486	0.0880437	2.98833	0.11605	12.3388	0.142981	5.31091	0.124612	3.04356	0.115356	3.04245	0.11379	19.6584	0.05364	6.66786	0.114324	2.17452	0.164292	19.0355	0.0540862	18.9158	0.0533979	3.00567	0.115221
Absolute Errs	TRUE	14.4092	0.1118	2.14427	0.161132	4.88752	0.0801223	18.8445	0.0534372	8.7959	0.109648	5.2708	0.114554	2.95727	0.115701	19.6984	0.0536202	15.2421	0.112919	8.21322	0.112448	15.5276	0.0558751	4.79632	0.114639	7.22959	0.0880848	2.98121	0.116095	12.2641	0.145264	5.29713	0.124825	3.02723	0.11544	3.03053	0.113869	19.6336	0.0537192	6.6039	0.114376	2.16672	0.164403	18.9723	0.0542262	18.8768	0.0534907	2.99879	0.115265
Symbol Type	1	8.12348	0.11198	2.24161	0.152838	4.12267	0.088807	18.8111	0.0534836	8.723	0.1097	5.23053	0.114579	2.94188	0.115775	19.6571	0.0536858	14.983	0.113044	8.18529	0.1125	15.4979	0.0559724	4.75317	0.114697	7.21216	0.0881153	2.97308	0.116129	12.1789	0.146961	5.2814	0.124983	3.0086	0.115502	3.01694	0.113928	19.6053	0.053778	6.53094	0.114414	2.15782	0.164485	18.9002	0.0543303	18.8322	0.0535597	2.99093	0.115298
Inverse Plot	TRUE	15.4321	0.055	2.34668	0.145041	3.54967	0.0987156	18.7748	0.0535121	8.6439	0.109732	5.18683	0.114594	2.92518	0.11582	19.6123	0.0537262	14.7017	0.11312	8.15499	0.112532	15.4656	0.0560323	4.70635	0.114732	7.19326	0.0881341	2.96426	0.11615	12.0865	0.148005	5.26434	0.12508	2.98838	0.11554	3.00219	0.113964	19.5746	0.0538142	6.45176	0.114438	2.14817	0.164536	18.822	0.0543943	18.7839	0.0536022	2.9824	0.115318
Color Plot	TRUE	4.65766	0.11412	2.4604	0.137711	3.10458	0.110036	18.7371	0.0535218	8.56164	0.109743	5.14139	0.114599	2.90782	0.115836	19.5656	0.0537398	14.4092	0.113146	8.12348	0.112543	15.4321	0.0560525	4.65766	0.114744	7.1736	0.0881404	2.95508	0.116157	11.9904	0.148358	5.24659	0.125113	2.96736	0.115553	2.98686	0.113976	19.5427	0.0538264	6.36943	0.114446	2.13812	0.164553	18.7406	0.054416	18.7336	0.0536166	2.97354	0.115325
3D plot	FALSE	7.1736	0.08781	2.58389	0.130817	2.74902	0.122987	18.6994	0.0535121	8.47938	0.109732	5.09595	0.114594	2.89046	0.11582	19.519	0.0537262	14.1167	0.11312	8.09196	0.112532	15.3986	0.0560323	4.60897	0.114732	7.15394	0.0881341	2.94591	0.11615	11.8943	0.148005	5.22884	0.12508	2.94634	0.11554	2.97152	0.113964	19.5108	0.0538142	6.28709	0.114438	2.12808	0.164536	18.6593	0.0543943	18.6833	0.0536022	2.96467	0.115318
Linear	FALSE	2.95508	0.11579	2.71845	0.124332	2.45857	0.137821	18.6631	0.0534836	8.40029	0.1097	5.05225	0.114579	2.87376	0.115775	19.4742	0.0536858	13.8355	0.113044	8.06166	0.1125	15.3663	0.0559724	4.56215	0.114697	7.13504	0.0881153	2.93709	0.116129	11.8019	0.146961	5.21178	0.124983	2.92612	0.115502	2.95677	0.113928	19.4801	0.053778	6.20792	0.114414	2.11842	0.164485	18.5811	0.0543303	18.635	0.0535597	2.95614	0.115298
Data Range	I3:L77	11.9904	0.13	2.86562	0.11823	2.21696	0.154833	18.6297	0.0534372	8.32739	0.109648	5.01198	0.114554	2.85838	0.115701	19.4329	0.0536202	13.5763	0.112919	8.03374	0.112448	15.3366	0.0558751	4.51901	0.114639	7.11762	0.0880848	2.92896	0.116095	11.7167	0.145264	5.19605	0.124825	2.90749	0.11544	2.94318	0.113869	19.4518	0.0537192	6.13495	0.114376	2.10953	0.164403	18.509	0.0542262	18.5904	0.0534907	2.94829	0.115265
Filled Symbols	TRUE	5.24659	0.1234	3.02725	0.112488	2.01291	0.174366	18.6004	0.0533748	8.26349	0.109578	4.97668	0.11452	2.84489	0.115603	19.3967	0.0535319	13.3491	0.112752	8.00926	0.112378	15.3105	0.0557443	4.48119	0.114561	7.10235	0.0880437	2.92183	0.11605	11.642	0.142981	5.18227	0.124612	2.89116	0.115356	2.93127	0.11379	19.427	0.05364	6.071	0.114324	2.10173	0.164292	18.4458	0.0540862	18.5514	0.0533979	2.9414	0.115221
ConcAge	FALSE	2.96736	0.11488	3.20555	0.107082	1.83837	0.196819	18.5764	0.0532988	8.21106	0.109493	4.94771	0.11448	2.83382	0.115482	19.367	0.0534244	13.1627	0.112548	7.98917	0.112293	15.2891	0.0555848	4.45015	0.114467	7.08981	0.0879936	2.91598	0.115994	11.5808	0.140199	5.17096	0.124352	2.87776	0.115254	2.92149	0.113694	19.4067	0.0535436	6.01851	0.114261	2.09532	0.164156	18.394	0.0539156	18.5193	0.0532848	2.93575	0.115167
ConcSwap	FALSE	2.98686	0.11334	3.40322	0.101992	IsoLine	IsoLine	18.5585	0.053212	8.17209	0.109395	4.92619	0.114433	2.8256	0.115344	19.3449	0.0533016	13.0241	0.112315	7.97424	0.112195	15.2732	0.0554028	4.42709	0.114359	7.0805	0.0879365	2.91164	0.115931	11.5352	0.137025	5.16255	0.124056	2.8678	0.115138	2.91423	0.113584	19.3916	0.0534335	5.97951	0.114189	2.09057	0.164002	18.3554	0.0537209	18.4955	0.0531557	2.93155	0.115106
1st Symbol-row	1	19.5427	0.05319	3.62359	0.0971978			18.5475	0.0531179	8.1481	0.10929	4.91293	0.114383	2.82054	0.115195	19.3313	0.0531685	12.9388	0.112063	7.96505	0.11209	15.2634	0.0552053	4.41288	0.114242	7.07477	0.0878745	2.90896	0.115862	11.5072	0.133581	5.15738	0.123734	2.86166	0.115011	2.90975	0.113464	19.3822	0.0533142	5.95549	0.114111	2.08764	0.163834	18.3317	0.0535097	18.4809	0.0530156	2.92896	0.115039
		6.36943	0.11403	3.87077	0.092681			18.5438	0.05302	8.14	0.10918	4.90846	0.11433	2.81883	0.11504	19.3267	0.05303	12.91	0.1118	7.96195	0.11198	15.2601	0.055	4.40809	0.11412	7.07283	0.08781	2.90806	0.11579	11.4977	0.13	5.15563	0.1234	2.85959	0.11488	2.90824	0.11334	19.3791	0.05319	5.94738	0.11403	2.08665	0.16366	18.3237	0.05329	18.4759	0.05287	2.92809	0.11497
		2.13812	0.16366	4.14994	0.0884245			18.5475	0.0529221	8.1481	0.10907	4.91293	0.114277	2.82054	0.114885	19.3313	0.0528915	12.9388	0.111537	7.96505	0.11187	15.2634	0.0547947	4.41288	0.113998	7.07477	0.0877455	2.90896	0.115718	11.5072	0.126419	5.15738	0.123066	2.86166	0.114749	2.90975	0.113216	19.3822	0.0530658	5.95549	0.113949	2.08764	0.163486	18.3317	0.0530703	18.4809	0.0527244	2.92896	0.114901
		18.7406	0.05329	4.46772	0.0844121			18.5585	0.052828	8.17209	0.108965	4.92619	0.114227	2.8256	0.114736	19.3449	0.0527584	13.0241	0.111285	7.97424	0.111765	15.2732	0.0545972	4.42709	0.113881	7.0805	0.0876835	2.91164	0.115649	11.5352	0.122975	5.16255	0.122744	2.8678	0.114622	2.91423	0.113096	19.3916	0.0529465	5.97951	0.113871	2.09057	0.163318	18.3554	0.0528591	18.4955	0.0525843	2.93155	0.114834
		18.7336	0.05287	4.83267	0.0806289			18.5764	0.0527412	8.21106	0.108867	4.94771	0.11418	2.83382	0.114598	19.367	0.0526356	13.1627	0.111052	7.98917	0.111667	15.2891	0.0544152	4.45015	0.113773	7.08981	0.0876264	2.91598	0.115586	11.5808	0.119801	5.17096	0.122448	2.87776	0.114506	2.92149	0.112986	19.4067	0.0528364	6.01851	0.113799	2.09532	0.163164	18.394	0.0526644	18.5193	0.0524552	2.93575	0.114773
		2.97354	0.11497	5.25609	0.0770606			18.6004	0.0526652	8.26349	0.108782	4.97668	0.11414	2.84489	0.114477	19.3967	0.0525281	13.3491	0.110848	8.00926	0.111582	15.3105	0.0542557	4.48119	0.113679	7.10235	0.0875763	2.92183	0.11553	11.642	0.117019	5.18227	0.122188	2.89116	0.114404	2.93127	0.11289	19.427	0.05274	6.071	0.113736	2.10173	0.163028	18.4458	0.0524938	18.5514	0.0523421	2.9414	0.114719
		16.0205	0.0548	5.7532	0.0736942			18.6297	0.0526028	8.32739	0.108712	5.01198	0.114106	2.85838	0.114379	19.4329	0.0524398	13.5763	0.110681	8.03374	0.111512	15.3366	0.0541249	4.51901	0.113601	7.11762	0.0875352	2.92896	0.115485	11.7167	0.114736	5.19605	0.121975	2.90749	0.11432	2.94318	0.112811	19.4518	0.0526608	6.13495	0.113684	2.10953	0.162917	18.509	0.0523538	18.5904	0.0522493	2.94829	0.114675
		2.97177	0.11354	6.345	0.0705172			18.6631	0.0525564	8.40029	0.10866	5.05225	0.114081	2.87376	0.114305	19.4742	0.0523742	13.8355	0.110556	8.06166	0.11146	15.3663	0.0540276	4.56215	0.113543	7.13504	0.0875047	2.93709	0.115451	11.8019	0.113039	5.21178	0.121817	2.92612	0.114258	2.95677	0.112752	19.4801	0.052602	6.20792	0.113646	2.11842	0.162835	18.5811	0.0522497	18.635	0.0521803	2.95614	0.114642
		7.54148	0.11013	7.06134	0.0675181			18.6994	0.0525279	8.47938	0.108628	5.09595	0.114066	2.89046	0.11426	19.519	0.0523338	14.1167	0.11048	8.09196	0.111428	15.3986	0.0539677	4.60897	0.113508	7.15394	0.0874859	2.94591	0.11543	11.8943	0.111995	5.22884	0.12172	2.94634	0.11422	2.97152	0.112716	19.5108	0.0525658	6.28709	0.113622	2.12808	0.162784	18.6593	0.0521857	18.6833	0.0521378	2.96467	0.114622
		3.73413	0.1174	7.94604	0.064686			18.7371	0.0525182	8.56164	0.108617	5.14139	0.114061	2.90782	0.114244	19.5656	0.0523202	14.4092	0.110454	8.12348	0.111417	15.4321	0.0539475	4.65766	0.113496	7.1736	0.0874796	2.95508	0.115423	11.9904	0.111642	5.24659	0.121687	2.96736	0.114207	2.98686	0.112704	19.5427	0.0525536	6.36943	0.113614	2.13812	0.162767	18.7406	0.052164	18.7336	0.0521234	2.97354	0.114615
		2.04834	0.16963	9.06624	0.0620109			18.7748	0.0525279	8.6439	0.108628	5.18683	0.114066	2.92518	0.11426	19.6123	0.0523338	14.7017	0.11048	8.15499	0.111428	15.4656	0.0539677	4.70635	0.113508	7.19326	0.0874859	2.96426	0.11543	12.0865	0.111995	5.26434	0.12172	2.98838	0.11422	3.00219	0.112716	19.5746	0.0525658	6.45176	0.113622	2.14817	0.162784	18.822	0.0521857	18.7839	0.0521378	2.9824	0.114622
		2.86287	0.11826	10.5302	0.0594833			18.8111	0.0525564	8.723	0.10866	5.23053	0.114081	2.94188	0.114305	19.6571	0.0523742	14.983	0.110556	8.18529	0.11146	15.4979	0.0540276	4.75317	0.113543	7.21216	0.0875047	2.97308	0.115451	12.1789	0.113039	5.2814	0.121817	3.0086	0.114258	3.01694	0.112752	19.6053	0.052602	6.53094	0.113646	2.15782	0.162835	18.9002	0.0522497	18.8322	0.0521803	2.99093	0.114642
		18.7758	0.05318	12.5248	0.0570943			18.8445	0.0526028	8.7959	0.108712	5.2708	0.114106	2.95727	0.114379	19.6984	0.0524398	15.2421	0.110681	8.21322	0.111512	15.5276	0.0541249	4.79632	0.113601	7.22959	0.0875352	2.98121	0.115485	12.2641	0.114736	5.29713	0.121975	3.02723	0.11432	3.03053	0.112811	19.6336	0.0526608	6.6039	0.113684	2.16672	0.162917	18.9723	0.0523538	18.8768	0.0522493	2.99879	0.114675
		19.6002	0.05261	15.4018	0.0548355			18.8738	0.0526652	8.85979	0.108782	5.3061	0.11414	2.97075	0.114477	19.7346	0.0525281	15.4693	0.110848	8.2377	0.111582	15.5537	0.0542557	4.83414	0.113679	7.24486	0.0875763	2.98833	0.11553	12.3388	0.117019	5.31091	0.122188	3.04356	0.114404	3.04245	0.11289	19.6584	0.05274	6.66786	0.113736	2.17452	0.163028	19.0355	0.0524938	18.9158	0.0523421	3.00567	0.114719
		19.497	0.05269	19.9127	0.0526992			18.8979	0.0527412	8.91223	0.108867	5.33506	0.11418	2.98182	0.114598	19.7643	0.0526356	15.6558	0.111052	8.25778	0.111667	15.5751	0.0544152	4.86518	0.113773	7.25739	0.0876264	2.99418	0.115586	12.4001	0.119801	5.32222	0.122448	3.05696	0.114506	3.05222	0.112986	19.6787	0.0528364	6.72034	0.113799	2.18092	0.163164	19.0873	0.0526644	18.9479	0.0524552	3.01133	0.114773
		4.03063	0.10879	28	0.0506781			18.9158	0.052828	8.95119	0.108965	5.35659	0.114227	2.99004	0.114736	19.7864	0.0527584	15.7943	0.111285	8.27271	0.111765	15.591	0.0545972	4.88824	0.113881	7.2667	0.0876835	2.99853	0.115649	12.4456	0.122975	5.33063	0.122744	3.06692	0.114622	3.05949	0.113096	19.6938	0.0529465	6.75934	0.113871	2.18568	0.163318	19.1258	0.0528591	18.9717	0.0525843	3.01553	0.114834
		2.94985	0.1128	28	0.0506781			18.9268	0.0529221	8.97519	0.10907	5.36984	0.114277	2.99511	0.114885	19.8	0.0528915	15.8796	0.111537	8.2819	0.11187	15.6008	0.0547947	4.90244	0.113998	7.27243	0.0877455	3.0012	0.115718	12.4736	0.126419	5.3358	0.123066	3.07305	0.114749	3.06396	0.113216	19.7032	0.0530658	6.78336	0.113949	2.18861	0.163486	19.1496	0.0530703	18.9864	0.0527244	3.01811	0.114901
		14.3431	0.05534	IsoLine	IsoLine			18.9305	0.05302	8.98329	0.10918	5.37432	0.11433	2.99682	0.11504	19.8046	0.05303	15.9085	0.1118	8.28501	0.11198	15.6041	0.055	4.90724	0.11412	7.27437	0.08781	3.00211	0.11579	12.4831	0.13	5.33755	0.1234	3.07512	0.11488	3.06547	0.11334	19.7063	0.05319	6.79147	0.11403	2.1896	0.16366	19.1576	0.05329	18.9913	0.05287	3.01899	0.11497
		3.05717	0.11167					ErrEll	ErrEll	ErrEll	ErrEll	ErrEll	ErrEll	ErrEll	ErrEll	ErrEll	ErrEll	ErrEll	ErrEll	ErrEll	ErrEll	ErrEll	ErrEll	ErrEll	ErrEll	ErrEll	ErrEll	ErrEll	ErrEll	ErrEll	ErrEll	ErrEll	ErrEll	ErrEll	ErrEll	ErrEll	ErrEll	ErrEll	ErrEll	ErrEll	ErrEll	ErrEll	ErrEll	ErrEll	ErrEll	ErrEll	ErrEll	ErrEll	ErrEll
		4.23729	0.11209
		18.9537	0.05287
		9.10747	0.11134
		6.16143	0.11175
		12.2399	0.05719
		2.08507	0.16673
		3.15756	0.11344
		3.92003	0.11794
		2.97708	0.11396
		2.079	0.1647
		2.94031	0.11446
		19.3461	0.05287
		19.4515	0.05342
		15.625	0.0541
		2.84576	0.11841
		12.3259	0.05753
		2.99581	0.11394
		21.978	0.0984
		3.44116	0.11382
		2.97442	0.1151
		19.4666	0.05233
		19.5963	0.0521
		2.92826	0.11552
		9.84252	0.0834
		19.3611	0.05264
		2.94724	0.11483
		19.1791	0.0636
		2.95508	0.1142
		3.52734	0.11348
		6.5703	0.11218
		3.75375	0.10836
		3.04971	0.11176
		3.1746	0.1129
		11.4025	0.10645
		19.5351	0.0525
		2.94551	0.11438
		19.7316	0.0526
		3.56888	0.1226
		2.98063	0.1143
		19.8373	0.05272
		9.42507	0.10944
		IsoLine	IsoLine
[truncated: 110 more columns]

## Sheet: Table
Minerals
Supporting information for
[Tectonic setting of the eastern margin of the Sino-Korean Block in the Pennsylvanian: constraints from detrital zircon ages]
Mun Gi Kim, Yong Il Lee, Taejin Choi
Table S1. LA-ICP-MS U–Pb dating data of detrital zircons from Yobong Formation sample
sample code	U	Th	Th/U		207Pb/206Pb		Error	206Pb/238U		Error	207Pb/235U		Error	238U-206Pb age		Error	235U-207Pb age		Error	207Pb-206Pb age		Error
	ppm	ppm					2σ			2σ			2σ	(Ma)		2σ	(Ma)		2σ	(Ma)		2σ
YW-2_1	338	307	0.8		0.05302	±	0.00041	0.05337	±	0.00045	0.3921	±	0.0043	335.1	±	2.7	335.8	±	3.1	338.9	±	9.2
YW-2_2	942	1360	1.2		0.10918	±	0.00046	0.1168	±	0.0047	1.781	±	0.076	711	±	27	1035	±	28	1785	±	6.7
YW-2_3	887	1180	0.97		0.11433	±	0.00022	0.1945	±	0.0072	3.06	±	0.11	1142	±	39	1419	±	28	1870.1	±	2
YW-2_4	414	55	0.12		0.11504	±	0.00065	0.3439	±	0.0086	5.43	±	0.14	1905	±	42	1889	±	23	1880.1	±	7.1
YW-2_5	225.1	254	1.12		0.05303	±	0.00058	0.05111	±	0.00051	0.3758	±	0.0057	321.3	±	3.1	324.2	±	4.3	327	±	14
YW-2_6	1510	1058	0.71		0.1118	±	0.0011	0.0694	±	0.0059	1.08	±	0.1	431	±	36	721	±	49	1831	±	16
YW-2_7	695	735	1.05		0.11198	±	0.00046	0.1231	±	0.002	1.898	±	0.032	748	±	12	1080	±	11	1834.1	±	3.6
YW-2_8	87.7	72	0.82		0.055	±	0.00086	0.0648	±	0.00059	0.487	±	0.0081	404.7	±	3.6	402.5	±	5.6	406	±	19
YW-2_9	375	221	0.45		0.11412	±	0.00051	0.2147	±	0.0094	3.4	±	0.15	1258	±	51	1495	±	35	1867.9	±	5.3
YW-2_10	999	252.9	0.25		0.08781	±	0.00027	0.1394	±	0.0016	1.687	±	0.02	841.2	±	8.8	1003.1	±	7.6	1376.2	±	4.1
YW-2_11	431	115.2	0.27		0.11579	±	0.0003	0.3384	±	0.0044	5.368	±	0.061	1879	±	21	1879.1	±	9.8	1893.4	±	2.7
YW-2_12	1213	1335	1.08		0.13	±	0.015	0.0834	±	0.0028	1.52	±	0.23	516	±	17	906	±	72	1990	±	140
YW-2_13	260	205	0.77		0.1234	±	0.0014	0.1906	±	0.0027	3.242	±	0.042	1124	±	14	1467.4	±	9.9	2005	±	19
YW-2_14	306	94	0.3		0.11488	±	0.00055	0.337	±	0.01	5.3	±	0.16	1869	±	49	1867	±	26	1877.6	±	3.7
YW-2_15	598	96	0.12		0.11334	±	0.00052	0.3348	±	0.0072	5.22	±	0.13	1859	±	35	1853	±	23	1852.9	±	8
YW-2_16	270.6	212.6	0.79		0.05319	±	0.00052	0.05117	±	0.00035	0.3744	±	0.0041	321.7	±	2.2	322.8	±	3	349	±	13
YW-2_17	595	210	0.34		0.11403	±	0.00034	0.157	±	0.0085	2.46	±	0.14	940	±	48	1245	±	41	1866.5	±	4.3
YW-2_18	128.4	79.5	0.62		0.16366	±	0.00073	0.4677	±	0.0092	10.42	±	0.19	2472	±	40	2475	±	18	2494.5	±	3.8
YW-2_19	89.9	82.4	0.91		0.05329	±	0.00092	0.05336	±	0.00097	0.389	±	0.009	335.1	±	5.9	333.9	±	6.5	342	±	20
YW-2_20	381	219.8	0.57		0.05287	±	0.00061	0.05338	±	0.0006	0.3863	±	0.0067	335.3	±	3.7	331.5	±	4.9	311	±	14
YW-2_21	231.2	57	0.16		0.11497	±	0.00029	0.3363	±	0.0042	5.301	±	0.07	1868	±	20	1867	±	11	1877.1	±	2.5
YW-2_22	95.4	43.9	0.45		0.0548	±	0.00069	0.06242	±	0.00065	0.4679	±	0.0079	390.3	±	3.9	389.9	±	5.4	397	±	16
YW-2_23	56.4	19.4	0.33		0.11354	±	0.00094	0.3365	±	0.0058	5.229	±	0.091	1869	±	28	1857	±	15	1850.9	±	8.1
YW-2_24	1164	544	0.47		0.11013	±	0.00039	0.1326	±	0.0038	2.003	±	0.06	803	±	22	1115	±	20	1798.4	±	3.3
YW-2_25	658	484	0.55		0.1174	±	0.0012	0.2678	±	0.0055	4.345	±	0.093	1529	±	28	1706	±	18	1917	±	17
YW-2_26	198.4	57.6	0.3		0.16963	±	0.00046	0.4882	±	0.005	11.4	±	0.12	2562	±	22	2557	±	10	2553.5	±	2.9
YW-2_27	232.3	208.4	0.93		0.11826	±	0.00049	0.3493	±	0.0037	5.728	±	0.078	1931	±	18	1935	±	12	1932.7	±	5.2
YW-2_28	600	276.9	0.5		0.05318	±	0.00034	0.05326	±	0.00053	0.3925	±	0.0047	334.5	±	3.3	336	±	3.4	338.4	±	9.3
YW-2_29	344	140.3	0.42		0.05261	±	0.00047	0.05102	±	0.00043	0.3725	±	0.005	320.7	±	2.6	321.4	±	3.7	319	±	13
YW-2_30	321	133.2	0.43		0.05269	±	0.00052	0.05129	±	0.00033	0.373	±	0.0044	322.4	±	2	321.7	±	3.2	311	±	12
YW-2_31	431	76.5	0.18		0.10879	±	0.00077	0.2481	±	0.0072	3.72	±	0.13	1427	±	37	1572	±	27	1783.8	±	9.5
YW-2_32	172.1	43.1	0.25		0.1128	±	0.00092	0.339	±	0.012	5.29	±	0.22	1880	±	59	1864	±	35	1847.5	±	9.1
YW-2_33	862	124.9	0.14		0.05534	±	0.00029	0.06972	±	0.00072	0.5353	±	0.0067	434.4	±	4.3	435.1	±	4.4	424.8	±	7.9
YW-2_34	173	55.8	0.33		0.11167	±	0.00061	0.3271	±	0.0043	5.042	±	0.072	1824	±	21	1826	±	12	1825.6	±	6.6
YW-2_35	391	259	0.31		0.11209	±	0.00057	0.236	±	0.023	3.65	±	0.37	1350	±	120	1514	±	84	1835.7	±	7.4
YW-2_36	238	130	0.56		0.05287	±	0.00079	0.05276	±	0.00099	0.3832	±	0.0091	331.4	±	6.1	329	±	6.7	332	±	19
YW-2_37	860	599	0.66		0.11134	±	0.00047	0.1098	±	0.0037	1.681	±	0.056	671	±	21	1001	±	22	1820.9	±	7.1
YW-2_38	599	495	0.8		0.11175	±	0.00042	0.1623	±	0.0069	2.51	±	0.11	967	±	38	1262	±	33	1828.2	±	5.8
YW-2_39	54.9	47.3	0.87		0.05719	±	0.00093	0.0817	±	0.0011	0.641	±	0.014	506.8	±	6.7	502.6	±	8.4	504	±	18
YW-2_40	111.5	89.7	0.81		0.16673	±	0.00056	0.4796	±	0.0044	11	±	0.11	2525	±	19	2522.6	±	9.1	2524.4	±	2.9
YW-2_41	412	57.2	0.14		0.11344	±	0.00023	0.3167	±	0.0029	4.935	±	0.044	1773	±	14	1809.2	±	7.3	1855.9	±	2.2
YW-2_42	636	125	0.19		0.11794	±	0.00063	0.2551	±	0.0073	4.12	±	0.11	1462	±	38	1661	±	22	1924.5	±	9.1
YW-2_43	248.5	73.8	0.3		0.11396	±	0.00037	0.3359	±	0.0031	5.258	±	0.053	1867	±	15	1861.4	±	8.5	1864.2	±	3.3
YW-2_44	31.1	73.6	2.35		0.1647	±	0.0013	0.481	±	0.011	10.93	±	0.27	2529	±	50	2517	±	23	2508.6	±	6.1
YW-2_45	527	76.4	0.14		0.11446	±	0.00027	0.3401	±	0.0054	5.318	±	0.09	1887	±	26	1871	±	14	1869.8	±	2.2
YW-2_46	283	221	0.78		0.05287	±	0.00058	0.05169	±	0.00052	0.3739	±	0.0057	324.9	±	3.2	322.3	±	4.2	322	±	14
YW-2_47	127.8	93.8	0.74		0.05342	±	0.00083	0.05141	±	0.00055	0.3762	±	0.0065	323.1	±	3.4	324.9	±	5	355	±	21
YW-2_48	73.8	41.7	0.56		0.0541	±	0.0017	0.064	±	0.00091	0.475	±	0.015	399.9	±	5.5	394	±	10	376	±	36
YW-2_49	787	32.54	0.04		0.11841	±	0.00034	0.3514	±	0.0031	5.705	±	0.053	1941	±	15	1931.8	±	8	1933.5	±	3.3
YW-2_50	283.6	284.8	1.02		0.05753	±	0.00039	0.08113	±	0.0005	0.6418	±	0.0055	502.8	±	3	503.7	±	3.4	510	±	8.6
YW-2_51	357	99	0.27		0.11394	±	0.00069	0.3338	±	0.0046	5.177	±	0.086	1857	±	22	1848	±	14	1861.6	±	7
YW-2_52	1701	1840	1.07		0.0984	±	0.00057	0.0455	±	0.0013	0.619	±	0.02	286.5	±	8.2	489	±	12	1603	±	8.7
YW-2_53	160	190.6	1.23		0.11382	±	0.00072	0.2906	±	0.0038	4.497	±	0.058	1644	±	19	1730	±	11	1860	±	7.3
YW-2_54	436.7	92	0.21		0.1151	±	0.00051	0.3362	±	0.0044	5.272	±	0.06	1868	±	21	1864	±	9.7	1880.6	±	5.4
YW-2_55	197	205.6	1.05		0.05233	±	0.00076	0.05137	±	0.00064	0.3698	±	0.0076	322.9	±	3.9	319.1	±	5.7	296	±	18
YW-2_56	40.3	76.2	1.88		0.0521	±	0.0014	0.05103	±	0.00082	0.366	±	0.013	320.8	±	5	316.9	±	9.2	335	±	37
YW-2_57	339.2	71.8	0.2		0.11552	±	0.00043	0.3415	±	0.0048	5.374	±	0.079	1894	±	23	1880	±	13	1886.9	±	3.4
YW-2_58	1613	224.7	0.14		0.0834	±	0.0017	0.1016	±	0.007	1.17	±	0.1	623	±	41	777	±	48	1274	±	38
YW-2_59	338.6	131.9	0.38		0.05264	±	0.00061	0.05165	±	0.0005	0.374	±	0.006	324.6	±	3.1	322.4	±	4.4	309	±	13
YW-2_60	139.3	53	0.29		0.11483	±	0.00059	0.3393	±	0.0051	5.417	±	0.087	1883	±	24	1886	±	14	1876.4	±	5
YW-2_61	268	644	2.33		0.0636	±	0.0014	0.05214	±	0.00049	0.457	±	0.012	327.7	±	3	382.4	±	8.2	712	±	46
YW-2_62	371	57.9	0.15		0.1142	±	0.00028	0.3384	±	0.0028	5.312	±	0.045	1879	±	13	1870.2	±	7.3	1867.1	±	2.2
YW-2_63	309	53.8	0.17		0.11348	±	0.00071	0.2835	±	0.0046	4.434	±	0.081	1609	±	23	1718	±	15	1853	±	5.9
YW-2_64	660	598	0.89		0.11218	±	0.00051	0.1522	±	0.0056	2.351	±	0.091	913	±	31	1228	±	28	1834.3	±	5.4
YW-2_65	761	46.5	0.06		0.10836	±	0.00039	0.2664	±	0.0026	3.958	±	0.046	1522	±	13	1625.2	±	9.4	1770.4	±	4.4
YW-2_66	657	96.2	0.15		0.11176	±	0.00023	0.3279	±	0.002	5.054	±	0.031	1828	±	9.6	1828	±	5.2	1827.4	±	2.3
YW-2_67	955	94.3	0.1		0.1129	±	0.00017	0.315	±	0.0028	4.909	±	0.042	1765	±	14	1803.2	±	7.2	1847.3	±	1.4
YW-2_68	1790	671	0.35		0.10645	±	0.00056	0.0877	±	0.0018	1.275	±	0.027	542	±	10	834	±	12	1741.8	±	8.6
YW-2_69	354	230	0.65		0.0525	±	0.00053	0.05119	±	0.00056	0.373	±	0.0059	321.8	±	3.4	321.7	±	4.4	305	±	13
YW-2_70	285.8	37.1	0.13		0.11438	±	0.00047	0.3395	±	0.0028	5.318	±	0.045	1884	±	13	1871.5	±	7.3	1869.8	±	4
YW-2_71	297.7	208.4	0.7		0.0526	±	0.00051	0.05068	±	0.00039	0.366	±	0.0043	318.7	±	2.4	316.5	±	3.2	318	±	11
YW-2_72	562	166	0.27		0.1226	±	0.0013	0.2802	±	0.0027	4.69	±	0.075	1592	±	13	1765	±	13	1994	±	18
YW-2_73	248.1	53.1	0.21		0.1143	±	0.00037	0.3355	±	0.0029	5.276	±	0.045	1865	±	14	1864.5	±	7.3	1868.4	±	3.5
YW-2_74	269	349.2	1.32		0.05272	±	0.00051	0.05041	±	0.00049	0.3661	±	0.0058	317	±	3	316.5	±	4.3	313	±	13
YW-2_75	1150	1311	1.14		0.10944	±	0.00048	0.1061	±	0.0022	1.604	±	0.035	650	±	13	971	±	14	1791.5	±	4.8
Plesovice_1	517	36.8	0.07		0.05319	±	0.00041	0.05409	±	0.00054	0.4007	±	0.0045	339.6	±	3.3	342	±	3.3	337.4	±	9.6
Plesovice_2	646	40.3	0.06		0.05295	±	0.00037	0.05398	±	0.00067	0.3931	±	0.0057	338.9	±	4.1	336.5	±	4.2	322.3	±	8.5
Plesovice_3	539	44.3	0.08		0.05323	±	0.00038	0.05396	±	0.00059	0.3974	±	0.0059	338.8	±	3.6	339.6	±	4.2	338	±	10
Plesovice_4	505	42.4	0.09		0.05277	±	0.00043	0.05379	±	0.00062	0.394	±	0.006	337.7	±	3.8	337.1	±	4.4	321	±	12
Plesovice_5	493	42.9	0.09		0.05304	±	0.00046	0.05395	±	0.00048	0.3946	±	0.0052	338.7	±	2.9	337.6	±	3.8	327	±	11
Plesovice_6	457	39.9	0.09		0.05291	±	0.00034	0.05387	±	0.00044	0.3939	±	0.0043	338.2	±	2.7	337.1	±	3.2	328.3	±	8.2
Plesovice_7	765	50.3	0.06		0.05353	±	0.00045	0.05365	±	0.00041	0.3956	±	0.0045	336.9	±	2.5	338.4	±	3.3	353.1	±	8.6
Plesovice_8	482	42.5	0.08		0.05323	±	0.00046	0.05374	±	0.0006	0.3958	±	0.0069	337.4	±	3.7	339.6	±	4.8	348	±	14
91500_1	78.3	29	0.37		0.07488	±	0.00065	0.1795	±	0.0021	1.858	±	0.03	1064	±	12	1066	±	10	1059	±	8.6
91500_2	82.5	31.4	0.38		0.07491	±	0.00056	0.1776	±	0.0021	1.845	±	0.026	1053	±	11	1061.6	±	8.9	1069.7	±	9.6
91500_3	79.9	29.7	0.37		0.0748	±	0.00047	0.1803	±	0.0021	1.857	±	0.028	1068	±	12	1064.5	±	9.7	1060.9	±	7.6
91500_4	79.7	29.6	0.37		0.07516	±	0.00059	0.1785	±	0.0022	1.842	±	0.027	1059	±	12	1060.4	±	9.5	1071.1	±	9.3
91500_5	80.2	30.7	0.38		0.07465	±	0.00055	0.1799	±	0.0022	1.842	±	0.026	1066	±	12	1061.9	±	9.3	1065.9	±	8.3
91500_6	80.4	30.5	0.37		0.07489	±	0.00051	0.1784	±	0.0023	1.845	±	0.025	1058	±	12	1060.5	±	8.8	1070.3	±	8.4
91500_7	79.7	29.2	0.37		0.07497	±	0.00063	0.18	±	0.0019	1.857	±	0.025	1067	±	10	1065.8	±	9	1068	±	10
91500_8	79.8	30.2	0.39		0.07475	±	0.00057	0.1799	±	0.0023	1.856	±	0.029	1066	±	12	1065	±	10	1065.7	±	8.6
91500_9	80.2	29.9	0.37		0.07522	±	0.00061	0.1801	±	0.002	1.871	±	0.023	1068	±	11	1071	±	8.2	1072.6	±	9.1
91500_10	80	30.1	0.37		0.07466	±	0.00064	0.1774	±	0.0019	1.821	±	0.028	1053	±	11	1051.6	±	9.9	1067	±	12
91500_11	79.8	29.5	0.37		0.07522	±	0.00057	0.1807	±	0.0024	1.865	±	0.029	1072	±	13	1067	±	10	1072.4	±	8.4
91500_12	80	30.4	0.37		0.07433	±	0.00056	0.1788	±	0.0021	1.849	±	0.029	1062	±	11	1063	±	10	1064	±	9.1
91500_13	80.1	30	0.38		0.075	±	0.00059	0.1789	±	0.0019	1.85	±	0.028	1061	±	10	1063	±	10	1063.3	±	9.1
91500_14	80.2	30.1	0.37		0.07514	±	0.00054	0.1799	±	0.0021	1.856	±	0.03	1066	±	12	1065	±	11	1070.4	±	9.3
91500_15	80.4	30.2	0.38		0.07473	±	0.00052	0.1787	±	0.0019	1.839	±	0.025	1061	±	10	1058.7	±	8.9	1065.6	±	8
91500_16	79.6	29.7	0.37		0.07503	±	0.00058	0.1781	±	0.0017	1.847	±	0.021	1056.7	±	9.4	1063.6	±	7.5	1070	±	10
91500_17	79.4	29.8	0.37		0.07434	±	0.00074	0.178	±	0.0021	1.819	±	0.022	1056	±	11	1052.4	±	8.2	1046	±	12
91500_18	80.6	30.1	0.37		0.07551	±	0.00069	0.1812	±	0.002	1.887	±	0.025	1075	±	11	1077.4	±	8.8	1077	±	11
91500_19	79.8	30	0.38		0.07457	±	0.00063	0.1788	±	0.0021	1.852	±	0.029	1060	±	12	1064	±	10	1063.2	±	9

## Sheet: PlotDat1
Source sheet	for pdplot	0	0	260	0	0	0
Plot name	ProbDens1	1.3	0	325	0	2598.7	0
Plot Type	16	2.6	0	325	12
1st free col	9	3.9	0	260	12
Sigma Level	2	5.2	0	260	0
Absolute Errs	TRUE	6.5	0	ErrBox	ErrBox
Symbol Type	1	7.8	0	325	0
Inverse Plot	FALSE	9.1	0	390	0
Color Plot	TRUE	10.4	0	390	5
3D plot	FALSE	11.7	0	325	5
Linear	FALSE	13	0	325	0
Data Range	A:B	14.3	0	ErrBox	ErrBox
Filled Symbols	TRUE	15.6	0	390	0
ConcAge	FALSE	16.9	0	455	0
ConcSwap	FALSE	18.2	0	455	4
1st Symbol-row	1	19.5	0	390	4
		20.8	0	390	0
		22.1	0	ErrBox	ErrBox
		23.4	0	455	0
		24.7	0	520	0
		26	0	520	2
		27.3	0	455	2
		28.6	0	455	0
		29.9	0	ErrBox	ErrBox
		31.2	0	1755	0
		32.5	0	1820	0
		33.8	0	1820	1
		35.1	0	1755	1
		36.4	0	1755	0
		37.7	0	ErrBox	ErrBox
		39	0	1820	0
		40.3	0	1885	0
		41.6	0	1885	20
		42.9	0	1820	20
		44.2	0	1820	0
		45.5	0	ErrBox	ErrBox
		46.8	0	1885	0
		48.1	0	1950	0
		49.4	0	1950	4
		50.7	0	1885	4
		52	0	1885	0
		53.3	0	ErrBox	ErrBox
		54.6	0	2470	0
		55.9	0	2535	0
		57.2	0	2535	3
		58.5	0	2470	3
		59.8	0	2470	0
		61.1	0	ErrBox	ErrBox
		62.4	0	2535	0
		63.7	0	2600	0
		65	0	2600	1
		66.3	0	2535	1
		67.6	0	2535	0
		68.9	0	ErrBox	ErrBox
		70.2	0
		71.5	0
		72.8	0
		74.1	0
		75.4	0
		76.7	0
		78	0
		79.3	0
		80.6	0
		81.9	0
		83.2	0
		84.5	0
		85.8	0
		87.1	0
		88.4	0
		89.7	0
		91	0
		92.3	0
		93.6	0
		94.9	0
		96.2	0
		97.5	0
		98.8	0
		100.1	0
		101.4	0
		102.7	0
		104	0
		105.3	0
		106.6	0
		107.9	0
		109.2	0
		110.5	0
		111.8	0
		113.1	0
		114.4	0
		115.7	0
		117	0
		118.3	0
		119.6	0
		120.9	0
		122.2	0
		123.5	0
		124.8	0
		126.1	0
		127.4	0
		128.7	0
		130	0
		131.3	0
		132.6	0
		133.9	0
		135.2	0
		136.5	0
		137.8	0
		139.1	0
		140.4	0
		141.7	0
		143	0
		144.3	0
		145.6	0
		146.9	0
		148.2	0
		149.5	0
		150.8	0
		152.1	0
		153.4	0
		154.7	0
		156	0
		157.3	0
		158.6	0
		159.9	0
		161.2	0
		162.5	0
		163.8	0
		165.1	0
		166.4	0
		167.7	0
		169	0
		170.3	0
		171.6	0
		172.9	0
		174.2	0
		175.5	0
		176.8	0
		178.1	0
		179.4	0
		180.7	0
		182	0
		183.3	0
		184.6	0
		185.9	0
		187.2	0
		188.5	0
		189.8	0
		191.1	0
		192.4	0
		193.7	0
		195	0
		196.3	0
		197.6	0
		198.9	0
		200.2	0
		201.5	0
		202.8	0
		204.1	0
		205.4	0
		206.7	0
		208	0
		209.3	0
		210.6	0
		211.9	0
		213.2	0
		214.5	0
		215.8	0
		217.1	0
		218.4	0
		219.7	0
		221	0
		222.3	0
		223.6	0
		224.9	0
		226.2	0
		227.5	0
		228.8	0
		230.1	0
		231.4	0
		232.7	0
		234	0
		235.3	0
		236.6	0
		237.9	0
		239.2	0
		240.5	0
		241.8	0
		243.1	0
		244.4	0
		245.7	0
		247	0
		248.3	0
		249.6	0
		250.9	0
		252.2	0
		253.5	0
		254.8	0
		256.1	0
		257.4	0
		258.7	0
		260	0
		261.3	0
		262.6	0
		263.9	0
		265.2	0
		266.5	0
		267.8	0
		269.1	0
		270.4	0
		271.7	0
		273	0
		274.3	0
		275.6	0
		276.9	0
		278.2	0
		279.5	0
		280.8	0
		282.1	0
		283.4	0
		284.7	0
		286	0
		287.3	0
		288.6	0
		289.9	0
		291.2	0
		292.5	0
		293.8	0
		295.1	0
		296.4	0
		297.7	0
		299	0
		300.3	0
		301.6	0
		302.9	0
		304.2	0
		305.5	0
		306.8	0
		308.1	0
		309.4	9.36784e-08
		310.7	1.63203e-06
		312	2.60274e-05
		313.3	0.000278449
		314.6	0.0015838
		315.9	0.00481361
		317.2	0.00957411
		318.5	0.0150127
		319.8	0.0216285
		321.1	0.0335286
		322.4	0.0377328
		323.7	0.0262799
		325	0.0166424
		326.3	0.00870254
		327.6	0.00361824
		328.9	0.00248942
		330.2	0.00327274
		331.5	0.005306
		332.8	0.00991195
		334.1	0.0163481
		335.4	0.0173418
		336.7	0.0106409
		338	0.00433096
		339.3	0.00154457
		340.6	0.000558802
		341.9	0.000196547
		343.2	6.18353e-05
		344.5	1.64754e-05
		345.8	3.65245e-06
		347.1	6.63593e-07
		348.4	1.00282e-07
		349.7	0
		351	0
		352.3	0
		353.6	0
		354.9	0
		356.2	0
		357.5	0
		358.8	0
		360.1	0
		361.4	0
		362.7	0
		364	0
		365.3	0
		366.6	0
		367.9	0
		369.2	0
		370.5	0
		371.8	0
		373.1	0
		374.4	0
		375.7	0
		377	0
		378.3	0
		379.6	0
		380.9	3.5391e-08
		382.2	7.04797e-07
		383.5	8.99945e-06
		384.8	7.36797e-05
		386.1	0.000386777
		387.4	0.00130192
		388.7	0.00281017
		390	0.00389185
		391.3	0.00347013
		392.6	0.00204441
		393.9	0.000973802
		395.2	0.000814868
		396.5	0.00132417
		397.8	0.00208913
		399.1	0.00270775
		400.4	0.00298941
		401.7	0.00331424
		403	0.00420597
		404.3	0.00493331
		405.6	0.00408646
		406.9	0.00212858
		408.2	0.000672878
		409.5	0.000128036
		410.8	1.47506e-05
		412.1	1.05953e-06
		413.4	3.60395e-08
		414.7	0
		416	0
		417.3	0
		418.6	0
		419.9	0
		421.2	0
		422.5	0
		423.8	0
		425.1	3.08636e-07
		426.4	3.51512e-06
		427.7	2.7775e-05
		429	0.000152261
		430.3	0.000579088
		431.6	0.00152799
		432.9	0.00279716
		434.2	0.00355251
		435.5	0.00313021
		436.8	0.00191351
		438.1	0.000811541
		439.4	0.000238787
		440.7	4.87451e-05
		442	6.90354e-06
		443.3	6.78318e-07
		444.6	4.62398e-08
		445.9	0
		447.2	0
		448.5	0
		449.8	0
		451.1	0
		452.4	0
		453.7	0
		455	0
		456.3	0
		457.6	0
		458.9	0
		460.2	0
		461.5	0
		462.8	0
		464.1	0
		465.4	0
		466.7	0
		468	0
		469.3	0
		470.6	0
		471.9	0
		473.2	0
		474.5	0
		475.8	0
		477.1	0
		478.4	0
		479.7	0
		481	0
		482.3	0
		483.6	0
		484.9	0
		486.2	0
		487.5	0
		488.8	0
		490.1	0
		491.4	5.90111e-08
		492.7	3.2582e-07
		494	1.54747e-06
		495.3	6.32217e-06
		496.6	2.32157e-05
		497.9	9.18017e-05
		499.2	0.000461733
		500.5	0.00196912
		501.8	0.00484673
		503.1	0.00625701
		504.4	0.00466687
		505.7	0.00295874
		507	0.00238724
		508.3	0.00207759
		509.6	0.00161494
		510.9	0.0010828
		512.2	0.000624572
		513.5	0.000309898
		514.8	0.000132268
		516.1	4.85611e-05
		517.4	1.53364e-05
		518.7	4.16636e-06
		520	9.73621e-07
		521.3	1.95714e-07
		522.6	3.38419e-08
		523.9	0
		525.2	0
		526.5	0
		527.8	0
		529.1	0
		530.4	0
		531.7	0
		533	0
		534.3	0
		535.6	0
		536.9	0
		538.2	0
		539.5	0
		540.8	0
		542.1	0
		543.4	0
		544.7	0
		546	0
		547.3	0
		548.6	0
		549.9	0
		551.2	0
		552.5	0
		553.8	0
		555.1	0
		556.4	0
		557.7	0
		559	0
		560.3	0
		561.6	0
		562.9	0
		564.2	0
		565.5	0
		566.8	0
		568.1	0
		569.4	0
		570.7	0
		572	0
		573.3	0
		574.6	0
		575.9	0
		577.2	0
		578.5	0
		579.8	0
		581.1	0
		582.4	0
		583.7	0
		585	0
		586.3	0
		587.6	0
		588.9	0
		590.2	0
		591.5	0
		592.8	0
		594.1	0
		595.4	0
		596.7	0
		598	0
		599.3	0
		600.6	0
		601.9	0
		603.2	0
		604.5	0
		605.8	0
		607.1	0
		608.4	0
		609.7	0
		611	0
		612.3	0
		613.6	0
		614.9	0
		616.2	0
		617.5	0
		618.8	0
		620.1	0
		621.4	0
		622.7	0
		624	0
		625.3	0
		626.6	0
		627.9	0
		629.2	0
		630.5	0
		631.8	0
		633.1	0
		634.4	0
		635.7	0
		637	0
		638.3	0
		639.6	0
		640.9	0
		642.2	0
		643.5	0
		644.8	0
		646.1	0
		647.4	0
		648.7	0
		650	0
		651.3	0
		652.6	0
		653.9	0
		655.2	0
		656.5	0
		657.8	0
		659.1	0
		660.4	0
		661.7	0
		663	0
		664.3	0
		665.6	0
		666.9	0
		668.2	0
		669.5	0
		670.8	0
		672.1	0
		673.4	0
		674.7	0
		676	0
		677.3	0
		678.6	0
		679.9	0
		681.2	0
		682.5	0
		683.8	0
		685.1	0
		686.4	0
		687.7	0
		689	0
		690.3	0
		691.6	0
		692.9	0
		694.2	0
		695.5	0
		696.8	0
		698.1	0
		699.4	0
		700.7	0
		702	0
		703.3	0
		704.6	0
		705.9	0
		707.2	0
		708.5	0
		709.8	0
		711.1	0
		712.4	0
		713.7	0
		715	0
		716.3	0
		717.6	0
		718.9	0
		720.2	0
		721.5	0
		722.8	0
		724.1	0
		725.4	0
		726.7	0
		728	0
		729.3	0
		730.6	0
		731.9	0
		733.2	0
		734.5	0
		735.8	0
		737.1	0
		738.4	0
		739.7	0
		741	0
		742.3	0
		743.6	0
		744.9	0
		746.2	0
		747.5	0
		748.8	0
		750.1	0
		751.4	0
		752.7	0
		754	0
		755.3	0
		756.6	0
		757.9	0
		759.2	0
		760.5	0
		761.8	0
		763.1	0
		764.4	0
		765.7	0
		767	0
		768.3	0
		769.6	0
		770.9	0
		772.2	0
		773.5	0
		774.8	0
		776.1	0
		777.4	0
		778.7	0
		780	0
		781.3	0
		782.6	0
		783.9	0
		785.2	0
		786.5	0
		787.8	0
		789.1	0
		790.4	0
		791.7	0
		793	0
		794.3	0
		795.6	0
		796.9	0
		798.2	0
		799.5	0
		800.8	0
		802.1	0
		803.4	0
		804.7	0
		806	0
		807.3	0
		808.6	0
		809.9	0
		811.2	0
		812.5	0
		813.8	0
		815.1	0
		816.4	0
		817.7	0
		819	0
		820.3	0
		821.6	0
		822.9	0
		824.2	0
		825.5	0
		826.8	0
		828.1	0
		829.4	0
		830.7	0
		832	0
		833.3	0
		834.6	0
		835.9	0
		837.2	0
		838.5	0
		839.8	0
		841.1	0
		842.4	0
		843.7	0
		845	0
		846.3	0
		847.6	0
		848.9	0
		850.2	0
		851.5	0
		852.8	0
		854.1	0
		855.4	0
		856.7	0
		858	0
		859.3	0
		860.6	0
		861.9	0
		863.2	0
		864.5	0
		865.8	0
		867.1	0
		868.4	0
		869.7	0
		871	0
		872.3	0
		873.6	0
		874.9	0
		876.2	0
		877.5	0
		878.8	0
		880.1	0
		881.4	0
		882.7	0
		884	0
		885.3	0
		886.6	0
		887.9	0
		889.2	0
		890.5	0
		891.8	0
		893.1	0
		894.4	0
		895.7	0
		897	0
		898.3	0
		899.6	0
		900.9	0
		902.2	0
		903.5	0
		904.8	0
		906.1	0
		907.4	0
		908.7	0
		910	0
		911.3	0
		912.6	0
		913.9	0
		915.2	0
		916.5	0
		917.8	0
		919.1	0
		920.4	0
		921.7	0
		923	0
		924.3	0
		925.6	0
		926.9	0
		928.2	0
		929.5	0
		930.8	0
		932.1	0
		933.4	0
		934.7	0
		936	0
		937.3	0
		938.6	0
		939.9	0
		941.2	0
		942.5	0
		943.8	0
		945.1	0
		946.4	0
		947.7	0
		949	0
		950.3	0
		951.6	0
		952.9	0
		954.2	0
		955.5	0
		956.8	0
		958.1	0
		959.4	0
		960.7	0
		962	0
		963.3	0
		964.6	0
		965.9	0
		967.2	0
		968.5	0
		969.8	0
		971.1	0
		972.4	0
		973.7	0
		975	0
		976.3	0
		977.6	0
		978.9	0
		980.2	0
		981.5	0
		982.8	0
		984.1	0
		985.4	0
		986.7	0
		988	0
		989.3	0
		990.6	0
		991.9	0
		993.2	0
		994.5	0
		995.8	0
		997.1	0
		998.4	0
		999.7	0
		1001	0
		1002.3	0
		1003.6	0
		1004.9	0
		1006.2	0
		1007.5	0
		1008.8	0
		1010.1	0
		1011.4	0
		1012.7	0
		1014	0
		1015.3	0
		1016.6	0
		1017.9	0
		1019.2	0
		1020.5	0
		1021.8	0
		1023.1	0
		1024.4	0
		1025.7	0
		1027	0
		1028.3	0
		1029.6	0
		1030.9	0
		1032.2	0
		1033.5	0
		1034.8	0
		1036.1	0
		1037.4	0
		1038.7	0
		1040	0
		1041.3	0
		1042.6	0
		1043.9	0
		1045.2	0
		1046.5	0
		1047.8	0
		1049.1	0
		1050.4	0
		1051.7	0
		1053	0
		1054.3	0
		1055.6	0
		1056.9	0
		1058.2	0
		1059.5	0
		1060.8	0
		1062.1	0
		1063.4	0
		1064.7	0
		1066	0
		1067.3	0
		1068.6	0
		1069.9	0
		1071.2	0
		1072.5	0
		1073.8	0
		1075.1	0
		1076.4	0
		1077.7	0
		1079	0
		1080.3	0
		1081.6	0
		1082.9	0
		1084.2	0
		1085.5	0
		1086.8	0
		1088.1	0
		1089.4	0
		1090.7	0
		1092	0
		1093.3	0
		1094.6	0
		1095.9	0
		1097.2	0
		1098.5	0
		1099.8	0
		1101.1	0
		1102.4	0
		1103.7	0
		1105	0
		1106.3	0
		1107.6	0
		1108.9	0
		1110.2	0
		1111.5	0
		1112.8	0
		1114.1	0
		1115.4	0
		1116.7	0
		1118	0
		1119.3	0
		1120.6	0
		1121.9	0
		1123.2	0
		1124.5	0
		1125.8	0
		1127.1	0
		1128.4	0
		1129.7	0
		1131	0
		1132.3	0
		1133.6	0
		1134.9	0
		1136.2	0
		1137.5	0
		1138.8	0
		1140.1	0
		1141.4	0
		1142.7	0
		1144	0
		1145.3	0
		1146.6	0
		1147.9	0
		1149.2	0
		1150.5	0
		1151.8	0
		1153.1	0
		1154.4	0
		1155.7	0
		1157	0
		1158.3	0
		1159.6	0
		1160.9	0
		1162.2	0
		1163.5	0
		1164.8	0
		1166.1	0
		1167.4	0
		1168.7	0
		1170	0
		1171.3	0
		1172.6	0
		1173.9	0
		1175.2	0
		1176.5	0
		1177.8	0
		1179.1	0
		1180.4	0
		1181.7	0
		1183	0
		1184.3	0
		1185.6	0
		1186.9	0
		1188.2	0
		1189.5	0
		1190.8	0
		1192.1	0
		1193.4	0
		1194.7	0
		1196	0
		1197.3	0
		1198.6	0
		1199.9	0
		1201.2	0
		1202.5	0
		1203.8	0
		1205.1	0
		1206.4	0
		1207.7	0
		1209	0
		1210.3	0
		1211.6	0
		1212.9	0
		1214.2	0
		1215.5	0
		1216.8	0
		1218.1	0
		1219.4	0
		1220.7	0
		1222	0
		1223.3	0
		1224.6	0
		1225.9	0
		1227.2	0
		1228.5	0
		1229.8	0
		1231.1	0
		1232.4	0
		1233.7	0
		1235	0
		1236.3	0
		1237.6	0
		1238.9	0
		1240.2	0
		1241.5	0
		1242.8	0
		1244.1	0
		1245.4	0
		1246.7	0
		1248	0
		1249.3	0
		1250.6	0
		1251.9	0
		1253.2	0
		1254.5	0
		1255.8	0
		1257.1	0
		1258.4	0
		1259.7	0
		1261	0
		1262.3	0
		1263.6	0
		1264.9	0
		1266.2	0
		1267.5	0
		1268.8	0
		1270.1	0
		1271.4	0
		1272.7	0
		1274	0
		1275.3	0
		1276.6	0
		1277.9	0
		1279.2	0
		1280.5	0
		1281.8	0
		1283.1	0
		1284.4	0
		1285.7	0
		1287	0
		1288.3	0
		1289.6	0
		1290.9	0
		1292.2	0
		1293.5	0
		1294.8	0
		1296.1	0
		1297.4	0
		1298.7	0
		1300	0
		1301.3	0
		1302.6	0
		1303.9	0
		1305.2	0
		1306.5	0
		1307.8	0
		1309.1	0
		1310.4	0
		1311.7	0
		1313	0
		1314.3	0
		1315.6	0
		1316.9	0
		1318.2	0
		1319.5	0
		1320.8	0
		1322.1	0
		1323.4	0
		1324.7	0
		1326	0
		1327.3	0
		1328.6	0
		1329.9	0
		1331.2	0
		1332.5	0
		1333.8	0
		1335.1	0
		1336.4	0
		1337.7	0
		1339	0
		1340.3	0
		1341.6	0
		1342.9	0
		1344.2	0
		1345.5	0
		1346.8	0
		1348.1	0
		1349.4	0
		1350.7	0
		1352	0
		1353.3	0
		1354.6	0
		1355.9	0
		1357.2	0
		1358.5	0
		1359.8	0
		1361.1	0
		1362.4	0
		1363.7	0
		1365	0
		1366.3	0
		1367.6	0
		1368.9	0
		1370.2	0
		1371.5	0
		1372.8	0
		1374.1	0
		1375.4	0
		1376.7	0
		1378	0
		1379.3	0
		1380.6	0
		1381.9	0
		1383.2	0
		1384.5	0
		1385.8	0
		1387.1	0
		1388.4	0
		1389.7	0
		1391	0
		1392.3	0
		1393.6	0
		1394.9	0
		1396.2	0
		1397.5	0
		1398.8	0
		1400.1	0
		1401.4	0
		1402.7	0
		1404	0
		1405.3	0
		1406.6	0
		1407.9	0
		1409.2	0
		1410.5	0
		1411.8	0
		1413.1	0
		1414.4	0
		1415.7	0
		1417	0
		1418.3	0
		1419.6	0
		1420.9	0
		1422.2	0
		1423.5	0
		1424.8	0
		1426.1	0
		1427.4	0
		1428.7	0
		1430	0
		1431.3	0
		1432.6	0
		1433.9	0
		1435.2	0
		1436.5	0
		1437.8	0
		1439.1	0
		1440.4	0
		1441.7	0
		1443	0
		1444.3	0
		1445.6	0
		1446.9	0
		1448.2	0
		1449.5	0
		1450.8	0
		1452.1	0
		1453.4	0
		1454.7	0
		1456	0
		1457.3	0
		1458.6	0
		1459.9	0
		1461.2	0
		1462.5	0
		1463.8	0
		1465.1	0
		1466.4	0
		1467.7	0
		1469	0
		1470.3	0
		1471.6	0
		1472.9	0
		1474.2	0
		1475.5	0
		1476.8	0
		1478.1	0
		1479.4	0
		1480.7	0
		1482	0
		1483.3	0
		1484.6	0
		1485.9	0
		1487.2	0
		1488.5	0
		1489.8	0
		1491.1	0
		1492.4	0
		1493.7	0
		1495	0
		1496.3	0
		1497.6	0
		1498.9	0
		1500.2	0
		1501.5	0
		1502.8	0
		1504.1	0
		1505.4	0
		1506.7	0
		1508	0
		1509.3	0
		1510.6	0
		1511.9	0
		1513.2	0
		1514.5	0
		1515.8	0
		1517.1	0
		1518.4	0
		1519.7	0
		1521	0
		1522.3	0
		1523.6	0
		1524.9	0
		1526.2	0
		1527.5	0
		1528.8	0
		1530.1	0
		1531.4	0
		1532.7	0
		1534	0
		1535.3	0
		1536.6	0
		1537.9	0
		1539.2	0
		1540.5	0
		1541.8	0
		1543.1	0
		1544.4	0
		1545.7	0
		1547	0
		1548.3	0
		1549.6	0
		1550.9	0
		1552.2	0
		1553.5	0
		1554.8	0
		1556.1	0
		1557.4	0
		1558.7	0
		1560	0
		1561.3	0
		1562.6	0
		1563.9	0
		1565.2	0
		1566.5	0
		1567.8	0
		1569.1	0
		1570.4	0
		1571.7	0
		1573	0
		1574.3	0
		1575.6	0
		1576.9	0
		1578.2	0
		1579.5	0
		1580.8	0
		1582.1	0
		1583.4	0
		1584.7	0
		1586	0
		1587.3	0
		1588.6	0
		1589.9	0
		1591.2	0
		1592.5	0
		1593.8	0
		1595.1	0
		1596.4	0
		1597.7	0
		1599	0
		1600.3	0
		1601.6	0
		1602.9	0
		1604.2	0
		1605.5	0
		1606.8	0
		1608.1	0
		1609.4	0
		1610.7	0
		1612	0
		1613.3	0
		1614.6	0
		1615.9	0
		1617.2	0
		1618.5	0
		1619.8	0
		1621.1	0
		1622.4	0
		1623.7	0
		1625	0
		1626.3	0
		1627.6	0
		1628.9	0
		1630.2	0
		1631.5	0
		1632.8	0
		1634.1	0
		1635.4	0
		1636.7	0
		1638	0
		1639.3	0
		1640.6	0
		1641.9	0
		1643.2	0
		1644.5	0
		1645.8	0
		1647.1	0
		1648.4	0
		1649.7	0
		1651	0
		1652.3	0
		1653.6	0
		1654.9	0
		1656.2	0
		1657.5	0
		1658.8	0
		1660.1	0
		1661.4	0
		1662.7	0
		1664	0
		1665.3	0
		1666.6	0
		1667.9	0
		1669.2	0
		1670.5	0
		1671.8	0
		1673.1	0
		1674.4	0
		1675.7	0
		1677	0
		1678.3	0
		1679.6	0
		1680.9	0
		1682.2	0
		1683.5	0
		1684.8	0
		1686.1	0
		1687.4	0
		1688.7	0
		1690	0
		1691.3	0
		1692.6	0
		1693.9	0
		1695.2	0
		1696.5	0
		1697.8	0
		1699.1	0
		1700.4	0
		1701.7	0
		1703	0
		1704.3	0
		1705.6	0
		1706.9	0
		1708.2	0
		1709.5	0
		1710.8	0
		1712.1	0
		1713.4	0
		1714.7	0
		1716	0
		1717.3	0
		1718.6	0
		1719.9	0
		1721.2	0
		1722.5	0
		1723.8	0
		1725.1	0
		1726.4	0
		1727.7	0
		1729	0
		1730.3	0
		1731.6	0
		1732.9	0
		1734.2	0
		1735.5	0
		1736.8	0
		1738.1	0
		1739.4	0
		1740.7	0
		1742	0
		1743.3	0
		1744.6	0
		1745.9	0
		1747.2	0
		1748.5	0
		1749.8	0
		1751.1	0
		1752.4	0
		1753.7	0
		1755	0
		1756.3	0
		1757.6	0
		1758.9	0
		1760.2	7.4931e-08
		1761.5	9.74232e-07
		1762.8	8.93346e-06
		1764.1	5.7774e-05
		1765.4	0.000263513
		1766.7	0.000847669
		1768	0.00192312
		1769.3	0.00307711
		1770.6	0.00347244
		1771.9	0.00276365
		1773.2	0.00155127
		1774.5	0.000614111
		1775.8	0.00017146
		1777.1	3.37624e-05
		1778.4	4.6888e-06
		1779.7	4.59245e-07
		1781	3.17237e-08
		1782.3	0
		1783.6	0
		1784.9	0
		1786.2	0
		1787.5	0
		1788.8	0
		1790.1	0
		1791.4	0
		1792.7	0
		1794	0
		1795.3	0
		1796.6	0
		1797.9	0
		1799.2	0
		1800.5	0
		1801.8	0
		1803.1	0
		1804.4	0
		1805.7	0
		1807	0
		1808.3	0
		1809.6	0
		1810.9	1.14154e-07
		1812.2	6.10803e-07
		1813.5	2.79843e-06
		1814.8	1.09782e-05
		1816.1	3.68764e-05
		1817.4	0.000106064
		1818.7	0.000261211
		1820	0.000550831
		1821.3	0.000994596
		1822.6	0.00153882
		1823.9	0.00210067
		1825.2	0.0033777
		1826.5	0.00715058
		1827.8	0.00814039
		1829.1	0.00356186
		1830.4	0.00103056
		1831.7	0.000431308
		1833	0.000198778
		1834.3	9.74975e-05
		1835.6	8.03872e-05
		1836.9	0.000123833
		1838.2	0.000226461
		1839.5	0.000402838
		1840.8	0.000674986
		1842.1	0.00106529
		1843.4	0.00159173
		1844.7	0.00227753
		1846	0.00505166
		1847.3	0.0150461
		1848.6	0.00715219
		1849.9	0.00631382
		1851.2	0.00715316
		1852.5	0.00753297
		1853.8	0.00829533
		1855.1	0.0117883
		1856.4	0.0119566
		1857.7	0.00699498
		1859	0.00510498
		1860.3	0.00505575
		1861.6	0.00573623
		1862.9	0.00715571
		1864.2	0.00798253
		1865.5	0.00919524
		1866.8	0.0134698
		1868.1	0.0145936
		1869.4	0.0151705
		1870.7	0.0107428
		1872	0.00447675
		1873.3	0.00315126
		1874.6	0.00542997
		1875.9	0.0113324
		1877.2	0.0159209
		1878.5	0.0131696
		1879.8	0.00872991
		1881.1	0.00613634
		1882.4	0.00447872
		1883.7	0.0035905
		1885	0.00401255
		1886.3	0.00501735
		1887.6	0.00447685
		1888.9	0.00240591
		1890.2	0.00107092
		1891.5	0.00223983
		1892.8	0.00516248
		1894.1	0.00496896
		1895.4	0.00189659
		1896.7	0.000286454
		1898	1.71138e-05
		1899.3	4.04554e-07
		1900.6	0
		1901.9	0
		1903.2	0
		1904.5	0
		1905.8	0
		1907.1	0
		1908.4	0
		1909.7	0
		1911	0
		1912.3	0
		1913.6	0
		1914.9	0
		1916.2	0
		1917.5	0
		1918.8	0
		1920.1	2.34494e-08
		1921.4	2.33439e-07
		1922.7	1.80985e-06
		1924	1.09279e-05
		1925.3	5.14077e-05
		1926.6	0.000188935
		1927.9	0.000551418
		1929.2	0.0013481
		1930.5	0.00295284
		1931.8	0.00551321
		1933.1	0.00743015
		1934.4	0.00638905
		1935.7	0.00342757
		1937	0.00124164
		1938.3	0.000357643
		1939.6	9.22093e-05
		1940.9	2.06154e-05
		1942.2	3.7225e-06
		1943.5	5.28598e-07
		1944.8	5.84578e-08
		1946.1	0
		1947.4	0
		1948.7	0
		1950	0
		1951.3	0
		1952.6	0
		1953.9	0
		1955.2	0
		1956.5	0
		1957.8	0
		1959.1	0
		1960.4	0
		1961.7	0
		1963	0
		1964.3	0
		1965.6	0
		1966.9	0
		1968.2	0
		1969.5	0
		1970.8	0
		1972.1	0
		1973.4	0
		1974.7	0
		1976	0
		1977.3	0
		1978.6	0
		1979.9	0
		1981.2	0
		1982.5	0
		1983.8	0
		1985.1	0
		1986.4	0
		1987.7	0
		1989	0
		1990.3	0
		1991.6	0
		1992.9	0
		1994.2	0
		1995.5	0
		1996.8	0
		1998.1	0
		1999.4	0
		2000.7	0
		2002	0
		2003.3	0
		2004.6	0
		2005.9	0
		2007.2	0
		2008.5	0
		2009.8	0
		2011.1	0
		2012.4	0
		2013.7	0
		2015	0
		2016.3	0
		2017.6	0
		2018.9	0
		2020.2	0
		2021.5	0
		2022.8	0
		2024.1	0
		2025.4	0
		2026.7	0
		2028	0
		2029.3	0
		2030.6	0
		2031.9	0
		2033.2	0
		2034.5	0
		2035.8	0
		2037.1	0
		2038.4	0
		2039.7	0
		2041	0
		2042.3	0
		2043.6	0
		2044.9	0
		2046.2	0
		2047.5	0
		2048.8	0
		2050.1	0
		2051.4	0
		2052.7	0
		2054	0
		2055.3	0
		2056.6	0
		2057.9	0
		2059.2	0
		2060.5	0
		2061.8	0
		2063.1	0
		2064.4	0
		2065.7	0
		2067	0
		2068.3	0
		2069.6	0
		2070.9	0
		2072.2	0
		2073.5	0
		2074.8	0
		2076.1	0
		2077.4	0
		2078.7	0
		2080	0
		2081.3	0
		2082.6	0
		2083.9	0
		2085.2	0
		2086.5	0
		2087.8	0
		2089.1	0
		2090.4	0
		2091.7	0
		2093	0
		2094.3	0
		2095.6	0
		2096.9	0
		2098.2	0
		2099.5	0
		2100.8	0
		2102.1	0
		2103.4	0
		2104.7	0
		2106	0
		2107.3	0
		2108.6	0
		2109.9	0
		2111.2	0
		2112.5	0
		2113.8	0
		2115.1	0
		2116.4	0
		2117.7	0
		2119	0
		2120.3	0
		2121.6	0
		2122.9	0
		2124.2	0
		2125.5	0
		2126.8	0
		2128.1	0
		2129.4	0
		2130.7	0
		2132	0
		2133.3	0
		2134.6	0
		2135.9	0
		2137.2	0
		2138.5	0
		2139.8	0
		2141.1	0
		2142.4	0
		2143.7	0
		2145	0
		2146.3	0
		2147.6	0
		2148.9	0
		2150.2	0
		2151.5	0
		2152.8	0
		2154.1	0
		2155.4	0
		2156.7	0
		2158	0
		2159.3	0
		2160.6	0
		2161.9	0
		2163.2	0
		2164.5	0
		2165.8	0
		2167.1	0
		2168.4	0
		2169.7	0
		2171	0
		2172.3	0
		2173.6	0
		2174.9	0
		2176.2	0
		2177.5	0
		2178.8	0
		2180.1	0
		2181.4	0
		2182.7	0
		2184	0
		2185.3	0
		2186.6	0
		2187.9	0
		2189.2	0
		2190.5	0
		2191.8	0
		2193.1	0
		2194.4	0
		2195.7	0
		2197	0
		2198.3	0
		2199.6	0
		2200.9	0
		2202.2	0
		2203.5	0
		2204.8	0
		2206.1	0
		2207.4	0
		2208.7	0
		2210	0
		2211.3	0
		2212.6	0
		2213.9	0
		2215.2	0
		2216.5	0
		2217.8	0
		2219.1	0
		2220.4	0
		2221.7	0
		2223	0
		2224.3	0
		2225.6	0
		2226.9	0
		2228.2	0
		2229.5	0
		2230.8	0
		2232.1	0
		2233.4	0
		2234.7	0
		2236	0
		2237.3	0
		2238.6	0
		2239.9	0
		2241.2	0
		2242.5	0
		2243.8	0
		2245.1	0
		2246.4	0
		2247.7	0
		2249	0
		2250.3	0
		2251.6	0
		2252.9	0
		2254.2	0
		2255.5	0
		2256.8	0
		2258.1	0
		2259.4	0
		2260.7	0
		2262	0
		2263.3	0
		2264.6	0
		2265.9	0
		2267.2	0
		2268.5	0
		2269.8	0
		2271.1	0
		2272.4	0
		2273.7	0
		2275	0
		2276.3	0
		2277.6	0
		2278.9	0
		2280.2	0
		2281.5	0
		2282.8	0
		2284.1	0
		2285.4	0
		2286.7	0
		2288	0
		2289.3	0
		2290.6	0
		2291.9	0
		2293.2	0
		2294.5	0
		2295.8	0
		2297.1	0
		2298.4	0
		2299.7	0
		2301	0
		2302.3	0
		2303.6	0
		2304.9	0
		2306.2	0
		2307.5	0
		2308.8	0
		2310.1	0
		2311.4	0
		2312.7	0
		2314	0
		2315.3	0
		2316.6	0
		2317.9	0
		2319.2	0
		2320.5	0
		2321.8	0
		2323.1	0
		2324.4	0
		2325.7	0
		2327	0
		2328.3	0
		2329.6	0
		2330.9	0
		2332.2	0
		2333.5	0
		2334.8	0
		2336.1	0
		2337.4	0
		2338.7	0
		2340	0
		2341.3	0
		2342.6	0
		2343.9	0
		2345.2	0
		2346.5	0
		2347.8	0
		2349.1	0
		2350.4	0
		2351.7	0
		2353	0
		2354.3	0
		2355.6	0
		2356.9	0
		2358.2	0
		2359.5	0
		2360.8	0
		2362.1	0
		2363.4	0
		2364.7	0
		2366	0
		2367.3	0
		2368.6	0
		2369.9	0
		2371.2	0
		2372.5	0
		2373.8	0
		2375.1	0
		2376.4	0
		2377.7	0
		2379	0
		2380.3	0
		2381.6	0
		2382.9	0
		2384.2	0
		2385.5	0
		2386.8	0
		2388.1	0
		2389.4	0
		2390.7	0
		2392	0
		2393.3	0
		2394.6	0
		2395.9	0
		2397.2	0
		2398.5	0
		2399.8	0
		2401.1	0
		2402.4	0
		2403.7	0
		2405	0
		2406.3	0
		2407.6	0
		2408.9	0
		2410.2	0
		2411.5	0
		2412.8	0
		2414.1	0
		2415.4	0
		2416.7	0
		2418	0
		2419.3	0
		2420.6	0
		2421.9	0
		2423.2	0
		2424.5	0
		2425.8	0
		2427.1	0
		2428.4	0
		2429.7	0
		2431	0
		2432.3	0
		2433.6	0
		2434.9	0
		2436.2	0
		2437.5	0
		2438.8	0
		2440.1	0
		2441.4	0
		2442.7	0
		2444	0
		2445.3	0
		2446.6	0
		2447.9	0
		2449.2	0
		2450.5	0
		2451.8	0
		2453.1	0
		2454.4	0
		2455.7	0
		2457	0
		2458.3	0
		2459.6	0
		2460.9	0
		2462.2	0
		2463.5	0
		2464.8	0
		2466.1	0
		2467.4	0
		2468.7	0
		2470	0
		2471.3	0
		2472.6	0
		2473.9	0
		2475.2	0
		2476.5	0
		2477.8	0
		2479.1	0
		2480.4	0
		2481.7	0
		2483	0
		2484.3	0
		2485.6	6.94211e-08
		2486.9	1.35439e-06
		2488.2	1.65456e-05
		2489.5	0.000126564
		2490.8	0.000606211
		2492.1	0.00181813
		2493.4	0.00341441
		2494.7	0.00401514
		2496	0.00295686
		2497.3	0.00136568
		2498.6	0.000405154
		2499.9	0.00011416
		2501.2	0.000140576
		2502.5	0.00034095
		2503.8	0.000729033
		2505.1	0.00130197
		2506.4	0.00193898
		2507.7	0.00240794
		2509	0.00249355
		2510.3	0.00215324
		2511.6	0.00155048
		2512.9	0.000930985
		2514.2	0.000466143
		2515.5	0.000194625
		2516.8	6.77605e-05
		2518.1	2.00934e-05
		2519.4	1.86132e-05
		2520.7	0.000204935
		2522	0.00134475
		2523.3	0.00396751
		2524.6	0.00524026
		2525.9	0.00309816
		2527.2	0.000819908
		2528.5	9.71268e-05
		2529.8	5.15021e-06
		2531.1	1.22243e-07
		2532.4	0
		2533.7	0
		2535	0
		2536.3	0
		2537.6	0
		2538.9	0
		2540.2	0
		2541.5	0
		2542.8	0
		2544.1	0
		2545.4	0
		2546.7	8.86736e-08
		2548	3.9742e-06
		2549.3	7.9729e-05
		2550.6	0.000715971
		2551.9	0.00287797
		2553.2	0.00517832
		2554.5	0.00417065
		2555.8	0.00150359
		2557.1	0.000242644
		2558.4	1.75275e-05
		2559.7	5.66738e-07
		2561	0
		2562.3	0
		2563.6	0
		2564.9	0
		2566.2	0
		2567.5	0
		2568.8	0
		2570.1	0
		2571.4	0
		2572.7	0
		2574	0
		2575.3	0
		2576.6	0
		2577.9	0
		2579.2	0
		2580.5	0
		2581.8	0
		2583.1	0
		2584.4	0
		2585.7	0
		2587	0
		2588.3	0
		2589.6	0
		2590.9	0
		2592.2	0
		2593.5	0
		2594.8	0
		2596.1	0
		2597.4	0
		2598.7	0
[truncated: 1 more rows]
