# Supplementary material
Source: MDPI journal article supplement (https://www.mdpi.com/2075-163X/10/6/527)
Supplement: s1 [file [Kim]TableS2_R1.xlsx]

## Sheet: Age data
Minerals
Supporting information for
[Tectonic setting of the eastern margin of the Sino-Korean Block in the Pennsylvanian: constraints from detrital zircon ages]
Mun Gi Kim, Yong Il Lee, Taejin Choi
Table S2. Detrital zircon U-Pb ages of Pennsylvanian sediments in the Sino-Korean Block
Site 1: Taebaek
Sample	Th/U	207Pb/206Pb	Error	207Pb/235U	Error	206Pb/238U	Error	238U-206Pb date	Error	235U-207Pb date	Error	207Pb-206Pb date	Error	Discordance 1 (238U–206Pb vs 235U–207Pb)	Discordance 2 (238U–206Pb vs 207Pb–206Pb)	Referred discordance	Preferred Age	Error	Data source
Name			1σ		1σ		1σ	(Ma)	1σ	(Ma)	1σ	(Ma)	1σ	(%)	(%)	(%)	(Ma)	1σ
LAMHFM-8	1.12948	0.103004	0.00127469	2.0536	0.0467684	0.144597	0.00276443	870.604	8.32219	1133.45	12.9065	1679	10.3889	23.1901	48.1474	23.1901	-	-	Kim et al. (2019)
LAMHFM-9	0.633434	0.0995167	0.00112302	1.89863	0.042005	0.13837	0.0026331	835.441	7.94896	1080.57	11.9532	1616	9.11809	22.6852	48.3019	22.6852	-	-	Kim et al. (2019)
LAMHFM-10	0.630679	0.102987	0.00134001	1.81483	0.0420335	0.127807	0.00244889	775.342	7.42811	1050.78	12.1687	1679	10.9231	26.213	53.8212	26.213	-	-	Kim et al. (2019)
LAMHFM-11	1.35702	0.0718481	0.000797732	0.173919	0.00384153	0.0175562	0.000335229	112.193	1.07114	162.809	1.79806	982	5.45159	31.0893	88.5751	31.0893	-	-	Kim et al. (2019)
LAMHFM-12	1.60417	0.108486	0.00137777	1.7679	0.0406194	0.118191	0.00226301	720.142	6.89432	1033.71	11.8753	1775	11.2712	30.3344	59.4286	30.3344	-	-	Kim et al. (2019)
LAMHFM-13	0.466525	0.0918872	0.00121093	1.08283	0.0251916	0.085468	0.00163861	528.679	5.06796	744.988	8.66594	1466	9.65982	29.0352	63.9373	29.0352	-	-	Kim et al. (2019)
LAMHFM-14	1.56256	0.102824	0.00145809	1.1608	0.0277497	0.0818772	0.00157578	507.318	4.88183	782.303	9.35074	1676	11.8833	35.1508	69.7304	35.1508	-	-	Kim et al. (2019)
LAMHFM-15	0.281214	0.108143	0.00144352	3.11219	0.0728307	0.20872	0.00401193	1222	11.7443	1435.66	16.7984	1769	11.8065	14.8823	30.9216	30.9216	-	-	Kim et al. (2019)
LAMHFM-16	0.404774	0.114748	0.00155268	4.87875	0.114939	0.308363	0.00594696	1732.64	16.7075	1798.53	21.1858	1876	12.6923	3.66327	7.64155	7.64155	1876	12.6923	Kim et al. (2019)
LAMHFM-17	0.422479	0.115262	0.00192259	4.43761	0.0992577	0.27923	0.00416109	1587.48	11.8283	1719.33	19.2284	1884	15.7128	7.66827	15.7387	15.7387	-	-	Kim et al. (2019)
LAMHFM-18	0.226368	0.11899	0.00196354	6.20954	0.138251	0.378485	0.00565694	2069.2	15.4634	2005.72	22.328	1942	16.0232	-3.16502	-6.55009	-6.55009	1942	16.0232	Kim et al. (2019)
LAMHFM-19	0.941896	0.0563588	0.00243242	0.366595	0.0170516	0.0471762	0.000818144	297.162	2.57673	317.115	7.37507	467	10.0778	6.29214	36.3679	6.29214	297	3	Kim et al. (2019)
LAMHFM-20	0.743143	0.115057	0.00211733	2.65927	0.0633559	0.167628	0.00253647	999.03	7.55841	1317.17	15.6905	1881	17.3074	24.1534	46.8884	24.1534	-	-	Kim et al. (2019)
LAMHFM-21	1.60642	0.0903005	0.00151722	0.552616	0.0124015	0.0443845	0.000660296	279.953	2.08239	446.693	5.01222	1432	12.0302	37.3275	80.4502	37.3275	-	-	Kim et al. (2019)
LAMHFM-22	0.191559	0.113885	0.00191561	4.94583	0.111235	0.314973	0.00470244	1765.13	13.1764	1810.05	20.3546	1863	15.6684	2.48154	5.25324	5.25324	1863	15.6684	Kim et al. (2019)
LAMHFM-23	1.35512	0.114275	0.00237684	3.21943	0.0835397	0.204328	0.00317017	1198.53	9.29763	1461.8	18.9658	1869	19.437	18.0097	35.8732	35.8732	-	-	Kim et al. (2019)
LAMHFM-24	0.754533	0.116819	0.00202198	2.85061	0.0652348	0.176979	0.00264945	1050.45	7.86283	1368.92	15.6636	1909	16.5211	23.2645	44.9739	44.9739	-	-	Kim et al. (2019)
LAMHFM-25	0.489118	0.11259	0.00203077	3.40756	0.0800983	0.219504	0.00330866	1279.25	9.64132	1506.09	17.7011	1842	16.6119	15.0612	30.5509	30.5509	-	-	Kim et al. (2019)
LAMHFM-26	1.3079	0.102239	0.00164231	1.23548	0.0253716	0.0876433	0.0011213	541.584	3.46449	816.802	8.38686	1666	13.3809	33.6946	67.4919	33.6946	-	-	Kim et al. (2019)
LAMHFM-27	0.257003	0.111588	0.0017854	3.38304	0.0694288	0.219882	0.00282597	1281.25	8.23346	1500.42	15.3963	1826	14.6079	14.6074	29.833	29.833	-	-	Kim et al. (2019)
LAMHFM-28	2.1102	0.110768	0.00169277	3.0153	0.0599679	0.197432	0.00251275	1161.51	7.39137	1411.45	14.0353	1813	13.8533	17.7079	35.9345	35.9345	-	-	Kim et al. (2019)
LAMHFM-29	1.53589	0.101674	0.00158704	0.722937	0.0145642	0.0515691	0.000656795	324.148	2.06421	552.38	5.56409	1655	12.9166	41.3179	80.414	41.3179	-	-	Kim et al. (2019)
LAMHFM-30	0.254637	0.112882	0.00178977	5.21473	0.106505	0.335047	0.00431343	1862.8	11.9909	1854.96	18.9427	1847	14.6423	-0.422456	-0.855223	-0.855223	1847	14.6423	Kim et al. (2019)
LAMHFM-31	1.31754	0.113161	0.00194959	2.65996	0.0574564	0.170482	0.00222123	1014.77	6.61076	1317.36	14.2278	1851	15.945	22.9699	45.1774	45.1774	-	-	Kim et al. (2019)
LAMHFM-32	0.250724	0.112488	0.00186006	4.77198	0.100327	0.307674	0.00399487	1729.25	11.2264	1779.92	18.7106	1840	15.2127	2.84668	6.01903	6.01903	1840	15.2127	Kim et al. (2019)
LAMHFM-33	0.765578	0.112783	0.00181034	3.73499	0.0768307	0.240184	0.00308986	1387.65	8.92577	1578.84	16.2388	1845	14.8075	12.1095	24.7884	24.7884	-	-	Kim et al. (2019)
LAMHFM-34	0.813097	0.110454	0.00176702	2.71265	0.0556289	0.178119	0.00228533	1056.69	6.77885	1331.88	13.6566	1807	14.454	20.6615	41.5223	41.5223	-	-	Kim et al. (2019)
LAMHFM-35	0.456132	0.115085	0.00149074	4.18187	0.06999	0.263542	0.00279308	1507.94	7.99073	1670.41	13.9785	1882	12.1891	9.72675	19.8758	19.8758	-	-	Kim et al. (2019)
LAMHFM-36	0.868513	0.132297	0.0017343	4.47949	0.075753	0.245571	0.00262354	1415.59	7.5617	1727.12	14.6037	2129	13.9547	18.0371	33.5089	33.5089	-	-	Kim et al. (2019)
LAMHFM-37	0.210393	0.112472	0.00134397	4.59327	0.0728847	0.296193	0.00309232	1672.4	8.73012	1747.98	13.8683	1840	10.9934	4.32397	9.1086	9.1086	1840	10.9934	Kim et al. (2019)
LAMHFM-38	0.704655	0.10995	0.00151478	3.25478	0.0567926	0.214696	0.00229897	1253.79	6.7128	1470.27	12.8273	1799	12.3924	14.7237	30.3064	30.3064	-	-	Kim et al. (2019)
LAMHFM-39	0.594173	0.114743	0.00159987	4.19923	0.0739622	0.265425	0.0028565	1517.54	8.16585	1673.81	14.7406	1876	13.0785	9.33642	19.1079	19.1079	-	-	Kim et al. (2019)
LAMHFM-40	1.22589	0.122703	0.00175621	3.28009	0.0589544	0.193878	0.00210775	1142.35	6.20954	1476.29	13.267	1996	14.2841	22.6202	42.768	42.768	-	-	Kim et al. (2019)
LAMHFM-41	1.49584	0.0747894	0.000969041	0.296515	0.00494751	0.0287545	0.000302298	182.748	0.960624	263.665	2.1997	1063	6.88661	30.6893	82.8083	30.6893	-	-	Kim et al. (2019)
LAMHFM-42	2.07579	0.0991384	0.00136025	0.816491	0.0141585	0.0597321	0.000633394	373.996	1.98291	606.067	5.25481	1608	11.0314	38.2913	76.7415	38.2913	-	-	Kim et al. (2019)
LAMHFM-43	0.248094	0.114314	0.00148455	3.76403	0.0631048	0.23881	0.00253208	1380.51	7.31868	1585.05	13.2869	1870	12.1425	12.9047	26.1761	26.1761	-	-	Kim et al. (2019)
LAMHFM-44	1.62207	0.103678	0.00146841	1.89331	0.0321123	0.132444	0.00123591	801.795	3.74098	1078.71	9.14794	1691	11.975	25.6706	52.5846	25.6706	-	-	Kim et al. (2019)
LAMHFM-45	0.874363	0.0953451	0.0012728	0.899813	0.014568	0.0684467	0.000626985	426.791	1.95474	651.605	5.27473	1535	10.2457	34.5016	72.196	34.5016	-	-	Kim et al. (2019)
LAMHFM-46	0.828912	0.123152	0.00179246	3.3082	0.0574708	0.194827	0.00184778	1147.47	5.44144	1482.93	12.8809	2003	14.5767	22.6216	42.7124	42.7124	-	-	Kim et al. (2019)
LAMHFM-47	1.25158	0.0846387	0.00111001	0.406625	0.00648379	0.0348436	0.000316022	220.792	1.00126	346.429	2.76198	1308	8.57702	36.2664	83.1199	36.2664	-	-	Kim et al. (2019)
LAMHFM-48	0.788499	0.0949149	0.00127361	0.817884	0.0132965	0.0624965	0.000573611	390.79	1.79339	606.846	4.9328	1527	10.245	35.603	74.408	35.603	-	-	Kim et al. (2019)
LAMHFM-49	0.896601	0.107928	0.00141962	1.83419	0.0293857	0.123256	0.00112739	749.278	3.42673	1057.74	8.4731	1765	11.6079	29.1627	57.548	29.1627	-	-	Kim et al. (2019)
LAMHFM-50	1.40029	0.121694	0.00171102	1.7454	0.0294496	0.104022	0.000970276	637.934	2.97521	1025.43	8.65086	1982	13.9335	37.7884	67.8136	37.7884	-	-	Kim et al. (2019)
LAMHFM-51	0.392972	0.105981	0.00129848	2.38645	0.0363394	0.163314	0.00147672	975.166	4.40882	1238.5	9.42957	1732	10.6102	21.2624	43.6971	21.2624	-	-	Kim et al. (2019)
LAMHFM-52	0.206082	0.115555	0.00151488	4.98895	0.0799639	0.313126	0.00288756	1756.07	8.09701	1817.39	14.5647	1889	12.3821	3.37372	7.03689	7.03689	1889	12.3821	Kim et al. (2019)
LAMHFM-53	0.55204	0.114717	0.00289108	3.37337	0.102092	0.213272	0.00357368	1246.23	10.4411	1498.18	22.6704	1876	23.6393	16.8171	33.5699	33.5699	-	-	Kim et al. (2019)
LAMHFM-54	0.955803	0.0850025	0.00214099	0.271661	0.00820862	0.023179	0.000386908	147.716	1.23285	244.012	3.68659	1316	16.5733	39.4637	88.7754	39.4637	-	-	Kim et al. (2019)
LAMHFM-55	0.829748	0.0902222	0.00225882	0.717762	0.0215944	0.0576987	0.000962617	361.615	3.0165	549.325	8.26343	1431	17.9134	34.1711	74.7299	34.1711	-	-	Kim et al. (2019)
LAMHFM-56	0.462445	0.0783692	0.00197142	0.871616	0.0262977	0.0806638	0.00134373	500.084	4.1653	636.422	9.60081	1157	14.5525	21.4226	56.7776	21.4226	-	-	Kim et al. (2019)
LAMHFM-57	1.29411	0.0811169	0.00208016	0.35731	0.010947	0.0319472	0.000535563	202.724	1.69923	310.194	4.75175	1225	15.7069	34.6461	83.4511	34.6461	-	-	Kim et al. (2019)
LAMHFM-58	0.84063	0.109165	0.00277131	2.36325	0.0718975	0.157008	0.00263243	940.13	7.88118	1231.52	18.7334	1786	22.67	23.6611	47.3611	23.6611	-	-	Kim et al. (2019)
LAMHFM-59	0.256281	0.114649	0.00300291	5.1954	0.162218	0.328661	0.00558594	1831.89	15.5674	1851.8	28.9097	1875	24.5552	1.07503	2.29918	2.29918	1875	24.5552	Kim et al. (2019)
LAMHFM-60	0.166803	0.116118	0.00290805	5.28596	0.159268	0.330158	0.00553097	1839.15	15.4052	1866.53	28.1197	1898	23.7666	1.46705	3.1007	3.1007	1898	23.7666	Kim et al. (2019)
LAMHFM-61	0.180735	0.114496	0.00287075	5.01801	0.151315	0.317862	0.00532495	1779.28	14.9036	1822.3	27.4752	1872	23.4682	2.36087	4.9531	4.9531	1872	23.4682	Kim et al. (2019)
LAMHFM-62	0.796392	0.102099	0.00144743	1.79137	0.032408	0.127251	0.00143015	772.164	4.33912	1042.29	9.42808	1663	11.7879	25.9164	53.568	25.9164	-	-	Kim et al. (2019)
LAMHFM-63	1.03464	0.112644	0.00183506	3.05485	0.0611288	0.196689	0.00228553	1157.51	6.72513	1421.4	14.2214	1843	15.012	18.5653	37.1942	37.1942	-	-	Kim et al. (2019)
LAMHFM-64	1.56412	0.094292	0.00145751	0.555902	0.0106767	0.0427585	0.000487407	269.909	1.53835	448.84	4.31021	1514	11.7013	39.8652	82.1725	39.8652	-	-	Kim et al. (2019)
LAMHFM-65	0.87102	0.113237	0.00196245	3.52438	0.0739412	0.225731	0.0026691	1312.09	7.75722	1532.65	16.0774	1853	16.0567	14.3906	29.1911	29.1911	-	-	Kim et al. (2019)
LAMHFM-66	0.955531	0.0756612	0.00107005	0.366018	0.00660331	0.0350856	0.000392988	222.299	1.24497	316.687	2.85666	1087	7.68655	29.8049	79.5493	29.8049	-	-	Kim et al. (2019)
LAMHFM-67	1.16368	0.0891079	0.00134184	0.53234	0.0100334	0.0433282	0.000491121	273.43	1.54965	433.346	4.08381	1407	10.5937	36.9026	80.5664	36.9026	-	-	Kim et al. (2019)
LAMHFM-68	0.388947	0.102506	0.0014992	1.79988	0.0332717	0.127349	0.00143971	772.722	4.3679	1045.38	9.66218	1670	12.2123	26.082	53.7292	26.082	-	-	Kim et al. (2019)
LAMHFM-69	0.782233	0.114205	0.00175949	3.6264	0.0697208	0.230297	0.0026487	1336.06	7.68315	1555.29	14.9509	1868	14.3896	14.0958	28.4766	28.4766	-	-	Kim et al. (2019)
LAMHFM-70	1.52745	0.0956838	0.00143029	0.799594	0.0149977	0.0606079	0.000686685	379.322	2.14885	596.578	5.59492	1542	11.525	36.4171	75.4007	36.4171	-	-	Kim et al. (2019)
LAMHFM-71	0.30559	0.114517	0.00144611	3.8399	0.0616998	0.243192	0.0024163	1403.27	6.9713	1601.09	12.8633	1873	11.826	12.3557	25.0791	25.0791	-	-	Kim et al. (2019)
LAMHFM-72	1.37534	0.0953918	0.00130321	0.921488	0.0155913	0.0700611	0.000699334	436.524	2.17864	663.123	5.60993	1536	10.4922	34.1715	71.5805	34.1715	-	-	Kim et al. (2019)
LAMHFM-73	0.647956	0.11217	0.00139056	2.38754	0.0378206	0.154373	0.00152235	925.431	4.56308	1238.83	9.81203	1835	11.3741	25.298	49.5678	25.298	-	-	Kim et al. (2019)
LAMHFM-74	1.37277	0.112365	0.00162634	2.45017	0.0433439	0.158148	0.00160855	946.476	4.81339	1257.43	11.1221	1839	13.3086	24.7293	48.5331	24.7293	-	-	Kim et al. (2019)
LAMHFM-75	0.885639	0.0552016	0.00192897	0.388632	0.0143579	0.0510606	0.000612347	321.03	1.92498	333.358	6.1579	421	7.35572	3.69824	23.7459	3.69824	321.03	1.92498	Kim et al. (2019)
LAMHFM-76	0.857901	0.109423	0.00141622	2.22166	0.0362354	0.147255	0.0014615	885.556	4.39456	1187.85	9.68696	1790	11.5837	25.4489	50.5276	25.4489	-	-	Kim et al. (2019)
LAMHFM-77	1.82599	0.101783	0.00147374	1.39481	0.0246394	0.0993896	0.00100576	610.831	3.09062	886.707	7.83185	1657	11.9961	31.1125	63.1364	31.1125	-	-	Kim et al. (2019)
LAMHFM-78	1.01349	0.110161	0.0015553	1.71111	0.0296885	0.112654	0.00113613	688.146	3.47002	1012.66	8.7851	1803	12.7278	32.0459	61.8333	32.0459	-	-	Kim et al. (2019)
LAMHFM-79	0.71472	0.111325	0.00152613	2.36831	0.0402639	0.154293	0.00155145	924.981	4.65045	1233.05	10.4816	1822	12.4887	24.9842	49.2327	24.9842	-	-	Kim et al. (2019)
06	0.22	0.11111	0.0023	4.28693	0.05358	0.27979	0.00316	1590	8	1691	5	1818	5	5.9728	12.5413	12.5413	-	-	Li et al. (2009)
07	0.93	0.05532	0.00248	0.34855	0.1502	0.0457	0.00058	288	2	304	6	425	51	5.26316	32.2353	5.26316	288	2	Li et al. (2009)
08	0.27	0.11448	0.00234	5.13021	0.0623	0.32496	0.00364	1814	9	1841	5	1872	5	1.46659	3.09829	3.09829	1872	5	Li et al. (2009)
09	0.14	0.11269	0.00198	4.75248	0.06398	0.30587	0.00344	1720	8	1777	6	1843	16	3.20765	6.6739	6.6739	1843	16	Li et al. (2009)
10	0.1	0.11418	0.00238	5.2344	0.06604	0.33243	0.00376	1850	9	1858	5	1867	5	0.430571	0.910552	0.910552	1867	5	Li et al. (2009)
11	0.44	0.11368	0.00248	4.99828	0.0708	0.31884	0.00372	1784	9	1819	6	1859	6	1.92413	4.03443	4.03443	1859	6	Li et al. (2009)
12	0.34	0.11468	0.00238	5.2484	0.06588	0.33188	0.00374	1847	9	1861	5	1875	5	0.752284	1.49333	1.49333	1875	5	Li et al. (2009)
16	0.73	0.05734	0.00156	0.38136	0.00806	0.04823	0.00056	304	2	328	3	505	13	7.31707	39.802	7.31707	304	2	Li et al. (2009)
18	0.89	0.11381	0.00262	4.38735	0.07038	0.27956	0.00336	1589	8	1710	7	1861	7	7.07602	14.6158	14.6158	-	-	Li et al. (2009)
19	0.54	0.11242	0.0025	4.98298	0.07408	0.32145	0.00378	1797	9	1816	6	1839	6	1.04626	2.28385	2.28385	1839	6	Li et al. (2009)
22	0.58	0.11543	0.00262	4.85667	0.07542	0.30512	0.00362	1717	9	1795	7	1887	7	4.3454	9.00901	9.00901	1887	7	Li et al. (2009)
23	1	0.05441	0.00182	0.3748	0.01064	0.04995	0.00062	314	2	323	4	388	21	2.78638	19.0722	2.78638	314	2	Li et al. (2009)
24	0.69	0.11178	0.00258	4.93058	0.07868	0.31986	0.00382	1789	9	1808	7	1829	7	1.05088	2.18699	2.18699	1829	7	Li et al. (2009)
25	0.23	0.11341	0.00234	5.11921	0.0622	0.32733	0.00358	1825	9	1839	5	1855	5	0.761283	1.61725	1.61725	1855	5	Li et al. (2009)
26	0.73	0.06342	0.00178	0.667	0.01486	0.07627	0.0009	474	3	519	5	722	14	8.67052	34.349	8.67052	474	3	Li et al. (2009)
30	0.48	0.11249	0.00238	5.12273	0.06618	0.33024	0.00364	1840	9	1840	5	1840	5	0	0	0	1840	5	Li et al. (2009)
32	0.37	0.10959	0.00222	4.20549	0.0505	0.2782	0.00306	1582	8	1675	5	1793	5	5.55224	11.768	11.768	-	-	Li et al. (2009)
33	0.4	0.11112	0.00222	4.51929	0.05098	0.29484	0.00318	1666	8	1735	5	1818	5	3.97695	8.36084	8.36084	1818	5	Li et al. (2009)
35	0.78	0.05273	0.00164	0.39331	0.0102	0.05408	0.00066	340	2	337	4	317	18	-0.890208	-7.25552	-0.890208	340	2	Li et al. (2009)
36	0.18	0.10951	0.00218	4.4951	0.04912	0.29764	0.00312	1680	8	1730	5	1791	4	2.89017	6.19765	6.19765	1791	4	Li et al. (2009)
37	0.31	0.1126	0.00238	4.97358	0.06398	0.32028	0.00352	1791	9	1815	5	1842	5	1.32231	2.76873	2.76873	1842	5	Li et al. (2009)
39	0.36	0.11285	0.00252	5.17881	0.0771	0.33276	0.00384	1852	9	1849	6	1846	6	-0.16225	-0.325027	-0.325027	1846	6	Li et al. (2009)
42	0.45	0.12454	0.00258	6.17551	0.07592	0.35957	0.00392	1980	9	2001	5	2022	5	1.04948	2.07715	2.07715	2022	5	Li et al. (2009)
44	0.62	0.11298	0.00244	5.10369	0.0691	0.32758	0.00366	1827	9	1837	6	1848	6	0.544366	1.13636	1.13636	1848	6	Li et al. (2009)
45	0.46	0.11371	0.00254	5.21463	0.07742	0.33255	0.00384	1851	9	1855	6	1860	6	0.215633	0.483871	0.483871	1860	6	Li et al. (2009)
48	0.8	0.05765	0.00198	0.38556	0.01136	0.0485	0.0006	305	2	331	4	516	21	7.85498	40.8915	7.85498	305	2	Li et al. (2009)
49	0.42	0.11417	0.00254	4.60555	0.06688	0.29255	0.00334	1654	8	1750	6	1867	6	5.48571	11.4087	11.4087	-	-	Li et al. (2009)
51	0.73	0.05232	0.00248	0.37171	0.01622	0.05152	0.00076	324	2	321	6	299	36	-0.934579	-8.3612	-0.934579	324	2	Li et al. (2009)
53	0.8	0.05541	0.00176	0.37043	0.00974	0.04848	0.00058	305	2	320	4	429	19	4.6875	28.9044	4.6875	305	2	Li et al. (2009)
55	0.97	0.05776	0.00212	0.49288	0.01572	0.06189	0.0008	387	2	407	5	521	24	4.914	25.7198	4.914	387	2	Li et al. (2009)
56	1.71	0.05559	0.00214	0.35719	0.01204	0.0466	0.00062	294	2	310	5	436	26	5.16129	32.5688	5.16129	294	2	Li et al. (2009)
57	1.5	0.05633	0.00276	0.38918	0.01758	0.0501	0.00076	315	2	334	6	465	36	5.68862	32.2581	5.68862	315	2	Li et al. (2009)
59	0.24	0.11286	0.00202	4.42547	0.06328	0.2844	0.0031	1613	8	1717	6	1846	17	6.05708	12.6219	12.6219	-	-	Li et al. (2009)
60	0.22	0.11419	0.00242	4.30937	0.05458	0.27367	0.00298	1559	8	1695	5	1867	5	8.0236	16.4971	16.4971	-	-	Li et al. (2009)
62	0.52	0.28815	0.00582	25.5789	0.28386	0.64373	0.00696	3204	14	3331	5	3408	4	3.81267	5.98592	5.98592	3408	4	Li et al. (2009)
63	1.66	0.05477	0.00142	0.3821	0.0728	0.05059	0.00056	318	2	329	3	403	12	3.34347	21.0918	3.34347	318	2	Li et al. (2009)
65	0.38	0.1158	0.00258	4.55572	0.06586	0.28529	0.00326	1618	8	1741	6	1892	6	7.06491	14.482	14.482	-	-	Li et al. (2009)
67	0.68	0.119	0.00258	5.76232	0.0778	0.35112	0.00394	1940	9	1941	6	1941	5	0.0515198	0.0515198	0.0515198	1941	5	Li et al. (2009)
68	0.32	0.12379	0.00258	6.38763	0.0871	0.3741	0.00426	2049	10	2031	6	2012	5	-0.886263	-1.83897	-1.83897	2012	5	Li et al. (2009)
70	0.18	0.05454	0.00404	0.55722	0.03962	0.07408	0.00146	461	4	450	13	393	62	-2.44444	-17.3028	-2.44444	461	4	Li et al. (2009)
71	0.99	0.12021	0.00258	4.80453	0.06808	0.28986	0.0033	1641	8	1786	6	1959	6	8.1187	16.2328	16.2328	-	-	Li et al. (2009)
72	0.36	0.11278	0.00286	4.72672	0.09238	0.30395	0.00396	1711	10	1772	8	1845	9	3.44244	7.26287	7.26287	1845	9	Li et al. (2009)
73	0.48	0.05493	0.00242	0.43253	0.01742	0.05711	0.0008	358	2	365	6	409	32	1.91781	12.4694	1.91781	358	2	Li et al. (2009)
74	0.18	0.10886	0.0026	4.72732	0.08336	0.31497	0.00388	1765	10	1772	7	1780	8	0.395034	0.842697	0.842697	1780	8	Li et al. (2009)
79	0.57	0.11328	0.00262	4.78474	0.07744	0.30633	0.00364	1723	9	1782	7	1853	7	3.31089	7.01565	7.01565	1853	7	Li et al. (2009)
80	0.43	0.12649	0.00286	6.25156	0.09628	0.35842	0.00426	1975	10	2012	7	2050	6	1.83897	3.65854	3.65854	2050	6	Li et al. (2009)
84	0.33	0.11549	0.00246	4.59383	0.05938	0.28833	0.00316	1633	8	1748	5	1888	5	6.57895	13.5064	13.5064	-	-	Li et al. (2009)
1.1	0.780137	0.0474149	0.00247208	0.415695	0.0220754	0.0635856	0.000641655	397.395	3.88908	352.956	18.7437	70.1764	124.02	-12.5905	-466.28	-12.5905	-	-	Kim et al. (2017)
1.2	0.60126	0.0578482	0.00498679	0.512015	0.0444357	0.0641935	0.00064368	401.078	3.89913	419.788	36.4317	524.019	189.054	4.45703	23.4611	4.45703	401.078	3.89913	Kim et al. (2017)
2.1	1.23308	0.0508246	0.00164644	0.358147	0.0120739	0.0511076	0.00047697	321.318	2.92525	310.819	10.4784	232.883	74.7792	-3.3779	-37.9743	-3.3779	321.318	2.92525	Kim et al. (2017)
3.1	0.942096	0.0499786	0.00236474	0.435412	0.0211229	0.0631852	0.000676819	394.967	4.10376	366.999	17.804	193.999	109.998	-7.62069	-103.593	-7.62069	394.967	4.10376	Kim et al. (2017)
3.2	0.78824	0.0483462	0.00279009	0.420721	0.0246858	0.0631148	0.000668608	394.54	4.05424	356.554	20.9208	116.243	136.103	-10.6538	-239.411	-10.6538	-	-	Kim et al. (2017)
4.1	1.73653	0.0545597	0.00101325	0.385643	0.00794541	0.051264	0.000457344	322.277	2.80446	331.17	6.8231	394.225	41.6531	2.68534	18.2505	2.68534	322.277	2.80446	Kim et al. (2017)
5.1	0.995137	0.080834	0.00169608	2.30061	0.0578173	0.206418	0.00285519	1209.71	15.2565	1212.43	30.47	1217.41	41.2596	0.224906	0.632882	0.632882	1217.41	41.2596	Kim et al. (2017)
6.1	0.94856	0.0525687	0.00188968	0.462286	0.0171913	0.0637797	0.000607527	398.571	3.68156	385.833	14.3482	310.226	81.8321	-3.30144	-28.4777	-3.30144	398.571	3.68156	Kim et al. (2017)
7.1	0.772739	0.0502129	0.00204964	0.434887	0.0183247	0.0628144	0.000656744	392.719	3.98342	366.627	15.4485	204.862	94.708	-7.11656	-91.6995	-7.11656	392.719	3.98342	Kim et al. (2017)
8.1	1.07291	0.0498015	0.002852	0.427492	0.0249997	0.0622565	0.000737558	389.334	4.47595	361.381	21.1336	185.737	133.337	-7.73491	-109.616	-7.73491	389.334	4.47595	Kim et al. (2017)
8.2	0.930807	0.0544933	0.00246678	0.471887	0.0220773	0.062805	0.000742296	392.661	4.50237	392.478	18.3621	391.491	101.578	-0.0468325	-0.298996	-0.0468325	392.661	4.50237	Kim et al. (2017)
9.1	1.36385	0.035898	0.00695025	0.246115	0.047826	0.0497241	0.000826713	312.827	5.07689	223.408	43.4134	-	-	-40.0253	-	-40.0253	-	-	Kim et al. (2017)
10.1	0.950187	0.0514878	0.00127389	0.372621	0.0127205	0.0524882	0.00123459	329.78	7.56175	321.583	10.9782	262.728	56.8059	-2.54897	-25.5213	-2.54897	329.78	7.56175	Kim et al. (2017)
11.1	0.37703	0.0505071	0.00209909	0.36585	0.0155978	0.0525351	0.000499633	330.067	3.06008	316.562	13.4965	218.397	96.1902	-4.26621	-51.1318	-4.26621	330.067	3.06008	Kim et al. (2017)
12.1	0.92294	0.0469511	0.00411504	0.392203	0.0347551	0.0605847	0.000792137	379.181	4.81474	335.965	29.7716	46.7422	209.404	-12.863	-711.217	-12.863	-	-	Kim et al. (2017)
13.1	0.721276	0.0538048	0.00178608	0.461919	0.0160879	0.062265	0.000656221	389.385	3.98231	385.578	13.4291	362.886	74.8654	-0.987454	-7.30227	-0.987454	389.385	3.98231	Kim et al. (2017)
14.1	1.27343	0.0487053	0.00298453	0.414061	0.0259042	0.0616577	0.000777435	385.699	4.72061	351.783	22.008	133.667	144.048	-9.64117	-188.553	-9.64117	385.699	4.72061	Kim et al. (2017)
15.1	0.880589	0.0518207	0.00379934	0.448617	0.0334511	0.0627872	0.000852955	392.554	5.17366	376.297	28.0586	277.505	167.886	-4.32021	-41.458	-4.32021	392.554	5.17366	Kim et al. (2017)
16.1	0.87141	0.114427	0.00083603	5.13254	0.0658263	0.325314	0.00342904	1815.63	16.6791	1841.44	23.617	1870.88	13.1782	1.40196	2.95345	2.95345	1870.88	13.1782	Kim et al. (2017)
17.1	1.24118	0.0579894	0.00428766	0.480973	0.0361468	0.060155	0.000809523	376.568	4.92241	398.726	29.9657	529.36	162.006	5.55731	28.8635	5.55731	376.568	4.92241	Kim et al. (2017)
18.1	0.694968	0.0514246	0.00173099	0.367577	0.0128848	0.0518414	0.000507113	325.817	3.10794	317.845	11.1415	259.908	77.3228	-2.50805	-25.3585	-2.50805	325.817	3.10794	Kim et al. (2017)
19.1	0.686291	0.154202	0.00155257	9.38794	0.133171	0.441549	0.0044122	2357.57	19.7307	2376.57	33.7125	2393.05	17.1328	0.799244	1.48263	1.48263	2393.05	17.1328	Kim et al. (2017)
20.1	1.28718	0.0494626	0.00239837	0.4184	0.020798	0.0613498	0.000671473	383.829	4.07838	354.893	17.6412	169.819	113.227	-8.15326	-126.022	-8.15326	383.829	4.07838	Kim et al. (2017)
21.1	0.879045	0.0498083	0.00355918	0.432103	0.0313653	0.0629194	0.000802665	393.355	4.86802	364.656	26.4694	186.056	166.367	-7.87033	-111.418	-7.87033	393.355	4.86802	Kim et al. (2017)
22.1	0.820235	0.0545046	0.00255273	0.471651	0.0226968	0.0627604	0.000693788	392.391	4.20833	392.315	18.8789	391.958	105.087	-0.0195623	-0.110467	-0.0195623	392.391	4.20833	Kim et al. (2017)
23.1	0.787072	0.0491829	0.00129859	0.353619	0.00984653	0.052146	0.00046115	327.683	2.82543	307.429	8.56035	156.56	61.8059	-6.58829	-109.302	-6.58829	327.683	2.82543	Kim et al. (2017)
24.1	0.869424	0.0527206	0.00365372	0.432351	0.0305366	0.0594778	0.000810076	372.449	4.92893	364.832	25.7677	316.793	157.583	-2.08782	-17.5684	-2.08782	372.449	4.92893	Kim et al. (2017)
25.1	1.16983	0.050961	0.00172941	0.442037	0.0156273	0.0629099	0.000623363	393.298	3.78062	371.674	13.1398	239.066	78.2496	-5.81791	-64.5144	-5.81791	393.298	3.78062	Kim et al. (2017)
16.2	0.344736	0.112445	0.00080961	4.87228	0.0622793	0.314262	0.00331912	1761.65	16.2802	1797.41	22.9752	1839.3	13.0365	1.98982	4.22192	4.22192	1839.3	13.0365	Kim et al. (2017)
26.1	0.705275	0.0535136	0.0021621	0.468991	0.0196337	0.0635622	0.000696827	397.253	4.22357	390.478	16.3469	350.636	91.3174	-1.73505	-13.2948	-1.73505	397.253	4.22357	Kim et al. (2017)
27.1	1.04165	0.0460518	0.00385428	0.378334	0.0320271	0.0595836	0.0007569	373.093	4.60491	325.8	27.5799	0.331484	201.728	-14.516	-112452	-14.516	-	-	Kim et al. (2017)
28.1	0.860435	0.0414974	0.00639239	0.372588	0.0575721	0.065119	0.000789229	406.682	4.77664	321.559	49.687	-	-	-26.472	-	-26.472	-	-	Kim et al. (2017)
29.1	1.02917	0.0404609	0.00611751	0.328103	0.0498058	0.058813	0.000795388	368.403	4.84259	288.106	43.7343	-	-	-27.8705	-	-27.8705	-	-	Kim et al. (2017)
30.1	1.29989	0.0509862	0.00198328	0.447069	0.0180021	0.0635946	0.000661963	397.449	4.01214	375.211	15.1086	240.207	89.6733	-5.92675	-65.4609	-5.92675	397.449	4.01214	Kim et al. (2017)
31.1	1.01259	0.0430457	0.00491976	0.372107	0.0428731	0.0626956	0.000913785	391.998	5.54311	321.203	37.008	-	-	-22.0407	-	-22.0407	-	-	Kim et al. (2017)
Site 2: Yeongwol
Sample	Th/U	207Pb/206Pb	Error	207Pb/235U	Error	206Pb/238U	Error	238U-206Pb date	Error	235U-207Pb date	Error	207Pb-206Pb date	Error	Discordance 1 (238U–206Pb vs 235U–207Pb)	Discordance 2 (238U–206Pb vs 207Pb–206Pb)	Discordance	Preferred Age	Error	Data source
Name			1σ		1σ		1σ	(Ma)	1σ	(Ma)	1σ	(Ma)	1σ	(%)	(%)	(%)	(Ma)	1σ
YW-2_1	0.8	0.05302	0.00041	0.3921	0.0043	0.05337	0.00045	335.1	1.35	335.8	1.55	338.9	4.6	0.208457	1.12127	0.208457	335.1	1.35	This study
YW-2_2	1.2	0.10918	0.00046	1.781	0.076	0.1168	0.0047	711	13.5	1035	14	1785	3.35	31.3043	60.1681	31.3043	-	-	This study
YW-2_3	0.97	0.11433	0.00022	3.06	0.11	0.1945	0.0072	1142	19.5	1419	14	1870.1	1	19.5208	38.9337	38.9337	-	-	This study
YW-2_4	0.12	0.11504	0.00065	5.43	0.14	0.3439	0.0086	1905	21	1889	11.5	1880.1	3.55	-0.847009	-1.3244	-1.3244	1880.1	3.55	This study
YW-2_5	1.12	0.05303	0.00058	0.3758	0.0057	0.05111	0.00051	321.3	1.55	324.2	2.15	327	7	0.89451	1.74312	0.89451	321.3	1.55	This study
YW-2_6	0.71	0.1118	0.0011	1.08	0.1	0.0694	0.0059	431	18	721	24.5	1831	8	40.2219	76.461	40.2219	-	-	This study
YW-2_7	1.05	0.11198	0.00046	1.898	0.032	0.1231	0.002	748	6	1080	5.5	1834.1	1.8	30.7407	59.2171	30.7407	-	-	This study
YW-2_8	0.82	0.055	0.00086	0.487	0.0081	0.0648	0.00059	404.7	1.8	402.5	2.8	406	9.5	-0.546584	0.320197	-0.546584	404.7	1.8	This study
YW-2_9	0.45	0.11412	0.00051	3.4	0.15	0.2147	0.0094	1258	25.5	1495	17.5	1867.9	2.65	15.8528	32.6516	32.6516	-	-	This study
YW-2_10	0.25	0.08781	0.00027	1.687	0.02	0.1394	0.0016	841.2	4.4	1003.1	3.8	1376.2	2.05	16.14	38.8752	16.14	-	-	This study
YW-2_11	0.27	0.11579	0.0003	5.368	0.061	0.3384	0.0044	1879	10.5	1879.1	4.9	1893.4	1.35	0.0053217	0.760537	0.760537	1893.4	1.35	This study
YW-2_12	1.08	0.13	0.015	1.52	0.23	0.0834	0.0028	516	8.5	906	36	1990	70	43.0464	74.0704	43.0464	-	-	This study
YW-2_13	0.77	0.1234	0.0014	3.242	0.042	0.1906	0.0027	1124	7	1467.4	4.95	2005	9.5	23.4019	43.9401	43.9401	-	-	This study
YW-2_14	0.3	0.11488	0.00055	5.3	0.16	0.337	0.01	1869	24.5	1867	13	1877.6	1.85	-0.107124	0.458032	0.458032	1877.6	1.85	This study
YW-2_15	0.12	0.11334	0.00052	5.22	0.13	0.3348	0.0072	1859	17.5	1853	11.5	1852.9	4	-0.323799	-0.329214	-0.329214	1852.9	4	This study
YW-2_16	0.79	0.05319	0.00052	0.3744	0.0041	0.05117	0.00035	321.7	1.1	322.8	1.5	349	6.5	0.340768	7.82235	0.340768	321.7	1.1	This study
YW-2_17	0.34	0.11403	0.00034	2.46	0.14	0.157	0.0085	940	24	1245	20.5	1866.5	2.15	24.498	49.6384	24.498	-	-	This study
YW-2_18	0.62	0.16366	0.00073	10.42	0.19	0.4677	0.0092	2472	20	2475	9	2494.5	1.9	0.121212	0.901984	0.901984	2494.5	1.9	This study
YW-2_19	0.91	0.05329	0.00092	0.389	0.009	0.05336	0.00097	335.1	2.95	333.9	3.25	342	10	-0.359389	2.01754	-0.359389	335.1	2.95	This study
YW-2_20	0.57	0.05287	0.00061	0.3863	0.0067	0.05338	0.0006	335.3	1.85	331.5	2.45	311	7	-1.1463	-7.8135	-1.1463	335.3	1.85	This study
YW-2_21	0.16	0.11497	0.00029	5.301	0.07	0.3363	0.0042	1868	10	1867	5.5	1877.1	1.25	-0.0535619	0.48479	0.48479	1877.1	1.25	This study
YW-2_22	0.45	0.0548	0.00069	0.4679	0.0079	0.06242	0.00065	390.3	1.95	389.9	2.7	397	8	-0.10259	1.68766	-0.10259	390.3	1.95	This study
YW-2_23	0.33	0.11354	0.00094	5.229	0.091	0.3365	0.0058	1869	14	1857	7.5	1850.9	4.05	-0.646204	-0.977903	-0.977903	1850.9	4.05	This study
YW-2_24	0.47	0.11013	0.00039	2.003	0.06	0.1326	0.0038	803	11	1115	10	1798.4	1.65	27.9821	55.3492	27.9821	-	-	This study
YW-2_25	0.55	0.1174	0.0012	4.345	0.093	0.2678	0.0055	1529	14	1706	9	1917	8.5	10.3751	20.24	20.24	-	-	This study
YW-2_26	0.3	0.16963	0.00046	11.4	0.12	0.4882	0.005	2562	11	2557	5	2553.5	1.45	-0.195542	-0.332876	-0.332876	2553.5	1.45	This study
YW-2_27	0.93	0.11826	0.00049	5.728	0.078	0.3493	0.0037	1931	9	1935	6	1932.7	2.6	0.206718	0.0879598	0.0879598	1932.7	2.6	This study
YW-2_28	0.5	0.05318	0.00034	0.3925	0.0047	0.05326	0.00053	334.5	1.65	336	1.7	338.4	4.65	0.446429	1.15248	0.446429	334.5	1.65	This study
YW-2_29	0.42	0.05261	0.00047	0.3725	0.005	0.05102	0.00043	320.7	1.3	321.4	1.85	319	6.5	0.217797	-0.532915	0.217797	320.7	1.3	This study
YW-2_30	0.43	0.05269	0.00052	0.373	0.0044	0.05129	0.00033	322.4	1	321.7	1.6	311	6	-0.217594	-3.66559	-0.217594	322.4	1	This study
YW-2_31	0.18	0.10879	0.00077	3.72	0.13	0.2481	0.0072	1427	18.5	1572	13.5	1783.8	4.75	9.22392	20.0022	20.0022	-	-	This study
YW-2_32	0.25	0.1128	0.00092	5.29	0.22	0.339	0.012	1880	29.5	1864	17.5	1847.5	4.55	-0.858369	-1.75913	-1.75913	1847.5	4.55	This study
YW-2_33	0.14	0.05534	0.00029	0.5353	0.0067	0.06972	0.00072	434.4	2.15	435.1	2.2	424.8	3.95	0.160883	-2.25989	0.160883	434.4	2.15	This study
YW-2_34	0.33	0.11167	0.00061	5.042	0.072	0.3271	0.0043	1824	10.5	1826	6	1825.6	3.3	0.109529	0.0876424	0.0876424	1825.6	3.3	This study
YW-2_35	0.31	0.11209	0.00057	3.65	0.37	0.236	0.023	1350	60	1514	42	1835.7	3.7	10.8322	26.4586	26.4586	-	-	This study
YW-2_36	0.56	0.05287	0.00079	0.3832	0.0091	0.05276	0.00099	331.4	3.05	329	3.35	332	9.5	-0.729483	0.180723	-0.729483	331.4	3.05	This study
YW-2_37	0.66	0.11134	0.00047	1.681	0.056	0.1098	0.0037	671	10.5	1001	11	1820.9	3.55	32.967	63.1501	32.967	-	-	This study
YW-2_38	0.8	0.11175	0.00042	2.51	0.11	0.1623	0.0069	967	19	1262	16.5	1828.2	2.9	23.3756	47.1064	23.3756	-	-	This study
YW-2_39	0.87	0.05719	0.00093	0.641	0.014	0.0817	0.0011	506.8	3.35	502.6	4.2	504	9	-0.835655	-0.555556	-0.835655	506.8	3.35	This study
YW-2_40	0.81	0.16673	0.00056	11	0.11	0.4796	0.0044	2525	9.5	2522.6	4.55	2524.4	1.45	-0.0951399	-0.023768	-0.023768	2524.4	1.45	This study
YW-2_41	0.14	0.11344	0.00023	4.935	0.044	0.3167	0.0029	1773	7	1809.2	3.65	1855.9	1.1	2.00088	4.46684	4.46684	1855.9	1.1	This study
YW-2_42	0.19	0.11794	0.00063	4.12	0.11	0.2551	0.0073	1462	19	1661	11	1924.5	4.55	11.9807	24.0322	24.0322	-	-	This study
YW-2_43	0.3	0.11396	0.00037	5.258	0.053	0.3359	0.0031	1867	7.5	1861.4	4.25	1864.2	1.65	-0.300849	-0.150198	-0.150198	1864.2	1.65	This study
YW-2_44	2.35	0.1647	0.0013	10.93	0.27	0.481	0.011	2529	25	2517	11.5	2508.6	3.05	-0.476758	-0.813203	-0.813203	2508.6	3.05	This study
YW-2_45	0.14	0.11446	0.00027	5.318	0.09	0.3401	0.0054	1887	13	1871	7	1869.8	1.1	-0.855158	-0.919884	-0.919884	1869.8	1.1	This study
YW-2_46	0.78	0.05287	0.00058	0.3739	0.0057	0.05169	0.00052	324.9	1.6	322.3	2.1	322	7	-0.806702	-0.900621	-0.806702	324.9	1.6	This study
YW-2_47	0.74	0.05342	0.00083	0.3762	0.0065	0.05141	0.00055	323.1	1.7	324.9	2.5	355	10.5	0.554017	8.98592	0.554017	323.1	1.7	This study
YW-2_48	0.56	0.0541	0.0017	0.475	0.015	0.064	0.00091	399.9	2.75	394	5	376	18	-1.49746	-6.35638	-1.49746	399.9	2.75	This study
YW-2_49	0.04	0.11841	0.00034	5.705	0.053	0.3514	0.0031	1941	7.5	1931.8	4	1933.5	1.65	-0.47624	-0.387898	-0.387898	1933.5	1.65	This study
YW-2_50	1.02	0.05753	0.00039	0.6418	0.0055	0.08113	0.0005	502.8	1.5	503.7	1.7	510	4.3	0.178678	1.41176	0.178678	502.8	1.5	This study
YW-2_51	0.27	0.11394	0.00069	5.177	0.086	0.3338	0.0046	1857	11	1848	7	1861.6	3.5	-0.487013	0.247099	0.247099	1861.6	3.5	This study
YW-2_52	1.07	0.0984	0.00057	0.619	0.02	0.0455	0.0013	286.5	4.1	489	6	1603	4.35	41.411	82.1273	41.411	-	-	This study
YW-2_53	1.23	0.11382	0.00072	4.497	0.058	0.2906	0.0038	1644	9.5	1730	5.5	1860	3.65	4.9711	11.6129	11.6129	-	-	This study
YW-2_54	0.21	0.1151	0.00051	5.272	0.06	0.3362	0.0044	1868	10.5	1864	4.85	1880.6	2.7	-0.214592	0.669999	0.669999	1880.6	2.7	This study
YW-2_55	1.05	0.05233	0.00076	0.3698	0.0076	0.05137	0.00064	322.9	1.95	319.1	2.85	296	9	-1.19085	-9.08784	-1.19085	322.9	1.95	This study
YW-2_56	1.88	0.0521	0.0014	0.366	0.013	0.05103	0.00082	320.8	2.5	316.9	4.6	335	18.5	-1.23067	4.23881	-1.23067	320.8	2.5	This study
YW-2_57	0.2	0.11552	0.00043	5.374	0.079	0.3415	0.0048	1894	11.5	1880	6.5	1886.9	1.7	-0.744681	-0.376279	-0.376279	1886.9	1.7	This study
YW-2_58	0.14	0.0834	0.0017	1.17	0.1	0.1016	0.007	623	20.5	777	24	1274	19	19.8198	51.0989	19.8198	-	-	This study
YW-2_59	0.38	0.05264	0.00061	0.374	0.006	0.05165	0.0005	324.6	1.55	322.4	2.2	309	6.5	-0.682382	-5.04854	-0.682382	324.6	1.55	This study
YW-2_60	0.29	0.11483	0.00059	5.417	0.087	0.3393	0.0051	1883	12	1886	7	1876.4	2.5	0.159067	-0.351737	-0.351737	1876.4	2.5	This study
YW-2_61	2.33	0.0636	0.0014	0.457	0.012	0.05214	0.00049	327.7	1.5	382.4	4.1	712	23	14.3044	53.9747	14.3044	-	-	This study
YW-2_62	0.15	0.1142	0.00028	5.312	0.045	0.3384	0.0028	1879	6.5	1870.2	3.65	1867.1	1.1	-0.470538	-0.637352	-0.637352	1867.1	1.1	This study
YW-2_63	0.17	0.11348	0.00071	4.434	0.081	0.2835	0.0046	1609	11.5	1718	7.5	1853	2.95	6.34459	13.1678	13.1678	-	-	This study
YW-2_64	0.89	0.11218	0.00051	2.351	0.091	0.1522	0.0056	913	15.5	1228	14	1834.3	2.7	25.6515	50.2262	25.6515	-	-	This study
YW-2_65	0.06	0.10836	0.00039	3.958	0.046	0.2664	0.0026	1522	6.5	1625.2	4.7	1770.4	2.2	6.34999	14.0307	14.0307	-	-	This study
YW-2_66	0.15	0.11176	0.00023	5.054	0.031	0.3279	0.002	1828	4.8	1828	2.6	1827.4	1.15	0	-0.0328335	-0.0328335	1827.4	1.15	This study
YW-2_67	0.1	0.1129	0.00017	4.909	0.042	0.315	0.0028	1765	7	1803.2	3.6	1847.3	0.7	2.11846	4.45515	4.45515	1847.3	0.7	This study
YW-2_68	0.35	0.10645	0.00056	1.275	0.027	0.0877	0.0018	542	5	834	6	1741.8	4.3	35.012	68.8828	35.012	-	-	This study
YW-2_69	0.65	0.0525	0.00053	0.373	0.0059	0.05119	0.00056	321.8	1.7	321.7	2.2	305	6.5	-0.0310849	-5.5082	-0.0310849	321.8	1.7	This study
YW-2_70	0.13	0.11438	0.00047	5.318	0.045	0.3395	0.0028	1884	6.5	1871.5	3.65	1869.8	2	-0.667913	-0.75944	-0.75944	1869.8	2	This study
YW-2_71	0.7	0.0526	0.00051	0.366	0.0043	0.05068	0.00039	318.7	1.2	316.5	1.6	318	5.5	-0.695103	-0.220126	-0.695103	318.7	1.2	This study
YW-2_72	0.27	0.1226	0.0013	4.69	0.075	0.2802	0.0027	1592	6.5	1765	6.5	1994	9	9.8017	20.1605	20.1605	-	-	This study
YW-2_73	0.21	0.1143	0.00037	5.276	0.045	0.3355	0.0029	1865	7	1864.5	3.65	1868.4	1.75	-0.0268168	0.181974	0.181974	1868.4	1.75	This study
YW-2_74	1.32	0.05272	0.00051	0.3661	0.0058	0.05041	0.00049	317	1.5	316.5	2.15	313	6.5	-0.157978	-1.27796	-0.157978	317	1.5	This study
YW-2_75	1.14	0.10944	0.00048	1.604	0.035	0.1061	0.0022	650	6.5	971	7	1791.5	2.4	33.0587	63.7176	33.0587	-	-	This study
Site 3: Gangjin
Sample	Th/U	207Pb/206Pb	Error	207Pb/235U	Error	206Pb/238U	Error	238U-206Pb date	Error	235U-207Pb date	Error	207Pb-206Pb date	Error	Discordance 1 (238U–206Pb vs 235U–207Pb)	Discordance 2 (238U–206Pb vs 207Pb–206Pb)	Discordance	Preferred Age	Error	Data source
Name			1σ		1σ		1σ	(Ma)	1σ	(Ma)	1σ	(Ma)	1σ	(%)	(%)	(%)	(Ma)	1σ
YM-14_1.1	0.51	0.0511	0.000976	0.352988	0.008465	0.0501	0.000726	315	4.5	306.955	7.36091	73	80.8	-2.62087	-331.507	-2.62087	315	4.5	Choi et al. (2015)
YM-14_2.1	0.42	0.1135	0.001135	5.21907	0.073441	0.3335	0.003302	1855	15.9	1855.67	26.1122	1842	9.8	0.0360517	-0.705755	-0.705755	1842	9.8	Choi et al. (2015)
YM-14_3.1	0.28	0.1154	0.001154	5.42418	0.084728	0.3409	0.004091	1891	19.6	1888.62	29.5011	1881	5.3	-0.126283	-0.531632	-0.531632	1881	5.3	Choi et al. (2015)
YM-14_4.1	0.31	0.1145	0.001145	5.32346	0.084388	0.3372	0.004148	1873	20	1872.57	29.6842	1861	9.8	-0.0229097	-0.644815	-0.644815	1861	9.8	Choi et al. (2015)
YM-14_5.1	0.72	0.0553	0.000553	0.465111	0.008308	0.061	0.000903	381	5.5	387.792	6.92662	276	81.9	1.75151	-38.0435	1.75151	381	5.5	Choi et al. (2015)
YM-14_6.1	0.88	0.0534	0.000812	0.36814	0.007633	0.05	0.000705	314	4.3	318.262	6.59848	224	56.4	1.33927	-40.1786	1.33927	314	4.3	Choi et al. (2015)
YM-14_7.1	0.63	0.0543	0.000825	0.383328	0.006771	0.0512	0.000461	322	2.8	329.473	5.82002	332	44.1	2.26802	3.01205	2.26802	322	2.8	Choi et al. (2015)
YM-14_8.1	0.9	0.0537	0.000784	0.385016	0.007108	0.052	0.000588	327	3.6	330.711	6.10562	334	37.6	1.12198	2.09581	1.12198	327	3.6	Choi et al. (2015)
YM-14_9.1	0.72	0.0527	0.001202	0.378573	0.011358	0.0521	0.001016	327	6.2	325.976	9.77977	285	60.4	-0.314134	-14.7368	-0.314134	327	6.2	Choi et al. (2015)
YM-14_10.1	0.79	0.0541	0.001472	0.364014	0.02021	0.0488	0.002362	307	14.5	315.196	17.4995	-38	169.5	2.60035	907.895	2.60035	307	14.5	Choi et al. (2015)
YM-14_11.1	0.76	0.054	0.00054	0.4646	0.009567	0.0624	0.001123	390	6.8	387.439	7.97785	216	69.2	-0.661111	-80.5556	-0.661111	390	6.8	Choi et al. (2015)
YM-14_12.1	0.51	0.0542	0.001057	0.369171	0.008057	0.0494	0.000484	311	3	319.027	6.96248	122	96.9	2.51624	-154.918	2.51624	311	3	Choi et al. (2015)
YM-14_13.1	0.8	0.1651	0.001651	10.9814	0.160027	0.4824	0.005113	2538	22.2	2521.46	36.7442	2506	8.3	-0.655849	-1.27694	-1.27694	2506	8.3	Choi et al. (2015)
YM-14_14.1	0.9	0.1144	0.001144	5.27307	0.087744	0.3343	0.004446	1859	21.4	1864.45	31.0244	1853	18.9	0.292151	-0.323799	-0.323799	1853	18.9	Choi et al. (2015)
YM-14_15.1	0.89	0.1118	0.001118	5.20718	0.081339	0.3378	0.004054	1876	19.6	1853.73	28.9561	1828	6.2	-1.20158	-2.62582	-2.62582	1828	6.2	Choi et al. (2015)
YM-14_13.2	0.32	0.1647	0.001647	9.88516	0.148422	0.4353	0.004875	2330	21.9	2424.04	36.3961	2496	10.6	3.87943	6.65064	6.65064	2496	10.6	Choi et al. (2015)
YM-14_16.1	0.32	0.1159	0.001159	5.40933	0.073138	0.3385	0.00308	1880	14.8	1886.27	25.5037	1895	8.2	0.332138	0.791557	0.791557	1895	8.2	Choi et al. (2015)
YM-14_17.1	0.94	0.0555	0.001104	0.367312	0.009734	0.048	0.00084	302	5.2	317.648	8.41774	453	48.6	4.9263	33.3333	4.9263	302	5.2	Choi et al. (2015)
YM-14_18.1	0.34	0.1686	0.001686	11.2304	0.201526	0.4831	0.007198	2541	31.2	2542.35	45.6216	2536	14.7	0.0532577	-0.197161	-0.197161	2536	14.7	Choi et al. (2015)
YM-14_19.1	0.72	0.0532	0.001032	0.390233	0.008608	0.0532	0.000559	334	3.4	334.528	7.37943	252	64.4	0.157864	-32.5397	0.157864	334	3.4	Choi et al. (2015)
YM-14_20.1	1.61	0.0637	0.003121	0.45	0.028	0.0512	0.00201	322	12.3	377.047	23.6599	335	295.9	14.5995	3.8806	14.6	-	-	Choi et al. (2015)
YM-14_21.1	0.67	0.1109	0.001109	4.994	0.092119	0.3266	0.005062	1822	24.6	1818.24	33.5391	1797	12.7	-0.206628	-1.39121	-1.39121	1797	12.7	Choi et al. (2015)
YM-14_22.1	0.95	0.0512	0.001121	0.351561	0.009372	0.0498	0.000757	313	4.6	305.884	8.15425	250	50.5	-2.32651	-25.2	-2.32651	313	4.6	Choi et al. (2015)
YM-14_23.1	0.25	0.0539	0.00076	0.384964	0.006439	0.0518	0.000466	325	2.9	330.672	5.53132	345	36	1.71532	5.7971	1.71532	325	2.9	Choi et al. (2015)
YM-14_24.1	0.19	0.1152	0.001152	5.4529	0.073727	0.3433	0.003124	1902	15	1893.14	25.5967	1879	8.4	-0.46774	-1.22406	-1.22406	1879	8.4	Choi et al. (2015)
YM-14_25.1	0.1	0.1125	0.001125	4.24084	0.101328	0.2734	0.005933	1558	30	1681.9	40.1863	1836	5.2	7.36694	15.1416	15.1416	-	-	Choi et al. (2015)
YM-14_26.1	0.92	0.1126	0.001126	5.10471	0.089914	0.3288	0.004768	1833	23.2	1836.83	32.3537	1846	10.4	0.20824	0.704225	0.704225	1846	10.4	Choi et al. (2015)
YM-14_27.1	0.21	0.1143	0.001143	5.40084	0.107921	0.3427	0.005929	1900	28.4	1884.92	37.6649	1860	9	-0.800034	-2.15054	-2.15054	1860	9	Choi et al. (2015)
YM-14_28.1	0.69	0.0523	0.000523	0.46007	0.007116	0.0638	0.000753	399	4.6	384.293	5.944	144	107.2	-3.82708	-177.083	-3.82708	399	4.6	Choi et al. (2015)
YM-14_29.1	1.07	0.1649	0.001649	10.6929	0.215523	0.4703	0.00823	2485	36.1	2496.72	50.3231	2501	6.5	0.469535	0.639744	0.639744	2501	6.5	Choi et al. (2015)
YM-14_29.2	0.43	0.1521	0.001521	9.50221	0.156602	0.4531	0.005936	2409	26.2	2387.68	39.3503	2371	23.2	-0.893128	-1.6027	-1.6027	2371	23.2	Choi et al. (2015)
YM-14_30.1	0.56	0.0558	0.000558	0.490089	0.006862	0.0637	0.000624	398	3.8	404.957	5.66997	211	73.4	1.71789	-88.6256	1.71789	398	3.8	Choi et al. (2015)
YM-14_31.1	0.47	0.1656	0.001656	10.9027	0.191143	0.4775	0.006876	2516	30	2514.78	44.0883	2513	2.1	-0.0485928	-0.119379	-0.119379	2513	2.1	Choi et al. (2015)
YM-14_32.1	0.81	0.0567	0.000958	0.407307	0.009851	0.0521	0.000901	327	5.5	346.922	8.3902	-52	129.4	5.74245	728.846	5.74245	327	5.5	Choi et al. (2015)
YM-14_33.1	0.22	0.0551	0.000551	0.471026	0.008066	0.062	0.000862	388	5.2	391.883	6.71036	355	33.4	0.990907	-9.29577	0.990907	388	5.2	Choi et al. (2015)
YM-14_34.1	0.19	0.1149	0.001149	5.52108	0.08414	0.3485	0.004008	1928	19.1	1903.82	29.0137	1879	4.1	-1.27029	-2.60777	-2.60777	1879	4.1	Choi et al. (2015)
YM-14_35.1	0.42	0.1144	0.001144	5.33932	0.094046	0.3385	0.004908	1879	23.7	1875.11	33.0281	1859	9.5	-0.207241	-1.07585	-1.07585	1859	9.5	Choi et al. (2015)
YM-14_36.1	1.06	0.1181	0.001181	5.77092	0.09193	0.3544	0.004395	1956	21	1941.99	30.9356	1920	8.9	-0.721425	-1.875	-1.875	1920	8.9	Choi et al. (2015)
YM-14_37.1	0.52	0.1162	0.001162	5.37527	0.092043	0.3355	0.004663	1865	22.5	1880.86	32.2066	1869	19	0.842968	0.214018	0.214018	1869	19	Choi et al. (2015)
YM-14_38.1	0.72	0.0532	0.000819	0.370428	0.009587	0.0505	0.00105	318	6.5	319.96	8.28071	268	48	0.612452	-18.6567	0.612452	318	6.5	Choi et al. (2015)
YM-14_39.1	0.63	0.0758	0.000758	0.827743	0.0106	0.0792	0.000634	491	3.8	612.337	7.84175	1077	34.6	19.8155	54.4104	19.8155	-	-	Choi et al. (2015)
YM-14_40.1	0.91	0.1154	0.001154	5.54033	0.07566	0.3482	0.003238	1926	15.4	1906.81	26.0397	1886	7.5	-1.00645	-2.12089	-2.12089	1886	7.5	Choi et al. (2015)
YM-14_41.1	0.78	0.0528	0.000818	0.372011	0.00718	0.0511	0.000588	322	3.6	321.132	6.19792	251	48.8	-0.270419	-28.2869	-0.270419	322	3.6	Choi et al. (2015)
YM-14_42.1	0.34	0.1127	0.001127	5.05797	0.079788	0.3255	0.003971	1817	19.3	1829.02	28.8522	1818	17.8	0.657183	0.0550055	0.0550055	1818	17.8	Choi et al. (2015)
YM-14_42.2	0.86	0.0558	0.000558	0.457006	0.008353	0.0594	0.000909	372	5.5	382.16	6.98517	431	21.5	2.65857	13.6891	2.65857	372	5.5	Choi et al. (2015)
YM-14_43.1	0.1	0.1154	0.001154	5.26666	0.068782	0.331	0.00278	1843	13.5	1863.41	24.3359	1882	6.3	1.09525	2.07226	2.07226	1882	6.3	Choi et al. (2015)
YM-14_43.2	0.86	0.057	0.00057	0.420465	0.006066	0.0535	0.000556	336	3.4	356.371	5.14163	366	36.6	5.71621	8.19672	5.71621	336	3.4	Choi et al. (2015)
Site 4: Xihu, Benxi
Sample	Th/U	207Pb/206Pb	Error	207Pb/235U	Error	206Pb/238U	Error	238U-206Pb date	Error	235U-207Pb date	Error	207Pb-206Pb date	Error	Discordance 1 (238U–206Pb vs 235U–207Pb)	Discordance 2 (238U–206Pb vs 207Pb–206Pb)	Discordance	Preferred Age	Error	Data source
Name			1σ		1σ		1σ	(Ma)	1σ	(Ma)	1σ	(Ma)	1σ	(%)	(%)	(%)	(Ma)	1σ
SC1-1	0.54	0.1154	0.0036	5.4488	0.0857	0.3423	0.0049	1897.8	23.7	1892.6	13.5	1886.8	55	-0.274754	-0.582998	-0.582998	1886.8	55	Wang et al. (2016)
SC1-2	0.16	0.1183	0.0037	5.8466	0.0905	0.3584	0.0051	1974.4	24.4	1953.4	13.4	1931.1	54.5	-1.07505	-2.24225	-2.24225	1931.1	54.5	Wang et al. (2016)
SC1-3	0.53	0.0528	0.002	0.3914	0.01	0.0537	0.0008	337.4	4.9	335.4	7.3	321.6	82.5	-0.596303	-4.91294	-0.596303	337.4	4.9	Wang et al. (2016)
SC1-4-1	1.32	0.1633	0.0056	10.85	0.2365	0.4819	0.0083	2535.6	36.1	2510.4	20.3	2489.9	56.4	-1.00382	-1.83542	-1.83542	2489.9	56.4	Wang et al. (2016)
SC1-4-2	0.51	0.1708	0.0055	12.1048	0.2252	0.514	0.0082	2673.7	34.8	2612.6	17.5	2565.4	53.2	-2.33867	-4.22156	-4.22156	2565.4	53.2	Wang et al. (2016)
SC1-5	1.05	0.0539	0.0029	0.3916	0.0176	0.0527	0.0009	331	5.6	335.6	12.8	366.8	114.5	1.37068	9.76009	1.37068	331	5.6	Wang et al. (2016)
SC1-6	0.49	0.1741	0.0054	11.9819	0.1897	0.4991	0.0073	2609.8	31.5	2603	14.8	2597.6	50.9	-0.261237	-0.469664	-0.469664	2597.6	50.9	Wang et al. (2016)
SC1-7	0.86	0.0574	0.0026	0.4182	0.0152	0.0529	0.0009	332.1	5.3	354.8	10.9	505.4	98.1	6.39797	34.2897	6.39797	332.1	5.3	Wang et al. (2016)
SC1-8	0.78	0.054	0.002	0.4025	0.0099	0.0541	0.0008	339.4	4.9	343.5	7.1	370.7	80.2	1.1936	8.44349	1.1936	339.4	4.9	Wang et al. (2016)
SC1-9	0.64	0.0526	0.002	0.3945	0.01	0.0544	0.0008	341.7	5	337.6	7.3	309.3	82.7	-1.21445	-10.4753	-1.21445	341.7	5	Wang et al. (2016)
SC1-10	0.11	0.0559	0.0019	0.5258	0.0101	0.0683	0.001	425.7	5.9	429	6.7	446.6	72.2	0.769231	4.6798	0.769231	425.7	5.9	Wang et al. (2016)
SC1-11	0.54	0.091	0.003	2.9675	0.0575	0.2364	0.0035	1368	18.4	1399.3	14.7	1447.3	62	2.23683	5.47917	5.47917	1447.3	62	Wang et al. (2016)
SC1-12	0.77	0.1751	0.0054	11.8819	0.1829	0.492	0.0071	2579.4	30.7	2595.1	14.4	2607.4	50.6	0.604986	1.07387	1.07387	2607.4	50.6	Wang et al. (2016)
SC1-13	0.64	0.0663	0.0026	0.6353	0.0179	0.0695	0.0011	433.1	6.5	499.4	11.1	815.8	80.1	13.2759	46.911	13.2759	-	-	Wang et al. (2016)
SC1-14	0.28	0.1136	0.0036	5.245	0.0863	0.335	0.0049	1862.5	23.5	1860	14	1857	55.9	-0.134409	-0.296177	-0.296177	1857	55.9	Wang et al. (2016)
SC1-15	0.46	0.1119	0.0035	5.0795	0.0794	0.3291	0.0047	1834	22.8	1832.7	13.3	1831.1	55.3	-0.0709336	-0.158375	-0.158375	1831.1	55.3	Wang et al. (2016)
SC1-16	0.21	0.0766	0.0026	1.8029	0.0378	0.1707	0.0026	1015.9	14	1046.5	13.7	1110.8	66.8	2.92403	8.54339	8.54339	1110.8	66.8	Wang et al. (2016)
SC1-17	0.54	0.1684	0.0054	11.9665	0.2117	0.5154	0.008	2679.7	33.8	2601.8	16.6	2541.6	52.6	-2.99408	-5.43359	-5.43359	2541.6	52.6	Wang et al. (2016)
SC1-18	0.4	0.0588	0.0021	0.5593	0.0133	0.069	0.001	430.2	6.2	451.1	8.7	558.6	76.8	4.63312	22.986	4.63312	430.2	6.2	Wang et al. (2016)
SC1-19	0.13	0.1138	0.0035	5.174	0.077	0.3299	0.0047	1837.8	22.5	1848.3	12.7	1860.1	54.5	0.56809	1.19886	1.19886	1860.1	54.5	Wang et al. (2016)
SC1-20	0.51	0.1236	0.0039	3.6838	0.0582	0.2161	0.0031	1261.4	16.4	1567.9	12.6	2009	54.4	19.5484	37.2125	37.2125	-	-	Wang et al. (2016)
SC1-21	0.69	0.0935	0.0035	0.8991	0.0228	0.0697	0.0011	434.6	6.6	651.2	12.2	1497.9	69	33.2617	70.986	33.2617	-	-	Wang et al. (2016)
SC1-22	0.43	0.0727	0.0026	0.7278	0.0169	0.0726	0.0011	451.8	6.5	555.2	9.9	1005.5	71	18.6239	55.0671	18.6239	-	-	Wang et al. (2016)
SC1-23	0.39	0.1699	0.0053	11.4379	0.1776	0.4884	0.0071	2563.7	30.6	2559.5	14.5	2556.1	51	-0.164095	-0.297328	-0.297328	2556.1	51	Wang et al. (2016)
SC1-24	1.02	0.0685	0.003	0.4896	0.0167	0.0518	0.0009	325.8	5.2	404.6	11.4	883.3	88.4	19.476	63.1156	19.476	-	-	Wang et al. (2016)
SC1-25	0.7	0.0501	0.002	0.3724	0.0109	0.0539	0.0008	338.3	5	321.4	8.1	200.9	90.5	-5.25825	-68.3922	-5.25825	338.3	5	Wang et al. (2016)
SC1-26	1.07	0.0532	0.0018	0.3785	0.0081	0.0516	0.0007	324.2	4.6	325.9	5.9	338	76.2	0.521632	4.08284	0.521632	324.2	4.6	Wang et al. (2016)
SC1-27	0.17	0.0601	0.0021	0.8256	0.0179	0.0996	0.0015	612.1	8.5	611.2	9.9	607.5	73.3	-0.147251	-0.757202	-0.147251	612.1	8.5	Wang et al. (2016)
SC1-28	0.4	0.1067	0.0033	2.4263	0.037	0.1649	0.0023	984.1	12.8	1250.4	11	1743.7	55.7	21.2972	43.5625	21.2972	-	-	Wang et al. (2016)
SC1-29	0.81	0.056	0.002	0.4327	0.0102	0.056	0.0008	351.3	5	365.1	7.2	452.9	77.8	3.77979	22.4332	3.77979	351.3	5	Wang et al. (2016)
SC1-30	0.64	0.0588	0.0021	0.5766	0.0137	0.0711	0.0011	442.5	6.3	462.2	8.8	561.3	76.8	4.26222	21.1652	4.26222	442.5	6.3	Wang et al. (2016)
SC1-31	0.46	0.1255	0.0039	4.9836	0.0795	0.288	0.0041	1631.3	20.6	1816.5	13.5	2036.1	54.4	10.1954	19.8811	19.8811	-	-	Wang et al. (2016)
SC1-32	0.84	0.0542	0.0021	0.3817	0.0101	0.0511	0.0008	321.1	4.7	328.3	7.4	379.5	82.7	2.19312	15.3887	2.19312	321.1	4.7	Wang et al. (2016)
SC1-33	0.45	0.1149	0.0036	4.791	0.0744	0.3024	0.0043	1703.2	21.2	1783.3	13.1	1878.3	55	4.49167	9.32226	9.32226	1878.3	55	Wang et al. (2016)
SC1-34	0.49	0.0618	0.0022	0.4616	0.0104	0.0541	0.0008	339.9	4.8	385.4	7.2	668.4	73.8	11.8059	49.1472	11.8059	-	-	Wang et al. (2016)
SC1-35	0.78	0.0756	0.0033	0.5498	0.0181	0.0527	0.0009	331.3	5.2	444.9	11.9	1085	84.1	25.5338	69.4654	25.5338	-	-	Wang et al. (2016)
SC1-36	0.5	0.0668	0.0024	0.644	0.0144	0.0699	0.001	435.7	6.2	504.8	8.9	831.4	71.7	13.6886	47.5944	13.6886	-	-	Wang et al. (2016)
SC1-37	0.6	0.0567	0.0029	0.5681	0.0238	0.0727	0.0012	452.3	7.5	456.8	15.4	478.5	108.4	0.985114	5.47544	0.985114	452.3	7.5	Wang et al. (2016)
SC1-38	0.57	0.1677	0.0053	10.9688	0.1787	0.4743	0.007	2502.4	30.5	2520.5	15.2	2535	51.7	0.718111	1.286	1.286	2535	51.7	Wang et al. (2016)
SC1-39	1.05	0.0595	0.0027	0.4124	0.0145	0.0502	0.0008	316	5	350.6	10.4	586.1	94.3	9.8688	46.0843	9.8688	316	5	Wang et al. (2016)
SC1-40	0.5	0.0572	0.0021	0.4317	0.0103	0.0548	0.0008	343.8	4.9	364.3	7.3	496.9	78.4	5.62723	30.811	5.62723	343.8	4.9	Wang et al. (2016)
SC1-41	0.51	0.0617	0.0024	0.6144	0.0165	0.0722	0.0011	449.4	6.6	486.3	10.4	664.3	80.2	7.58791	32.3498	7.58791	449.4	6.6	Wang et al. (2016)
SC1-42	0.11	0.1187	0.0037	5.5702	0.0893	0.3402	0.0049	1887.7	23.4	1911.5	13.8	1937.3	55.1	1.2451	2.56026	2.56026	1937.3	55.1	Wang et al. (2016)
SC1-43	0.18	0.0573	0.0019	0.5157	0.0091	0.0653	0.0009	407.8	5.6	422.2	6.1	501	70.2	3.41071	18.6028	3.41071	407.8	5.6	Wang et al. (2016)
SC1-44	0.77	0.065	0.0025	0.506	0.0139	0.0565	0.0009	354.1	5.2	415.8	9.4	774	79.7	14.8389	54.2506	14.8389	-	-	Wang et al. (2016)
SC1-45	1.21	0.0916	0.0033	0.6639	0.0157	0.0525	0.0008	330.1	4.9	517	9.6	1459.8	67.5	36.1509	77.3873	36.1509	-	-	Wang et al. (2016)
SC1-46	0.55	0.12	0.0038	4.0422	0.0642	0.2444	0.0035	1409.5	18	1642.7	12.9	1955.5	54.9	14.1961	27.9212	27.9212	-	-	Wang et al. (2016)
SC1-47	0.78	0.1655	0.0051	10.5666	0.1592	0.4629	0.0066	2452.5	28.9	2485.8	14	2513	51	1.33961	2.40748	2.40748	2513	51	Wang et al. (2016)
SC1-48	0.51	0.0716	0.0026	0.7463	0.0173	0.0756	0.0011	469.7	6.7	566.1	10.1	975	71.4	17.0288	51.8256	17.0288	-	-	Wang et al. (2016)
SC1-49	1.09	0.0647	0.0029	0.4617	0.0165	0.0518	0.0008	325.5	5.2	385.4	11.4	763	92.7	15.5423	57.3394	15.5423	-	-	Wang et al. (2016)
SC1-50	0.74	0.0809	0.0026	1.1188	0.0198	0.1003	0.0014	616.1	8.3	762.4	9.5	1219.2	62.2	19.1894	49.4669	19.1894	-	-	Wang et al. (2016)
SC1-51	0.5	0.1208	0.0038	5.9715	0.0996	0.3585	0.0052	1974.8	24.6	1971.7	14.5	1968.3	55.4	-0.157225	-0.330234	-0.330234	1968.3	55.4	Wang et al. (2016)
SC1-52	0.71	0.0714	0.0025	1.5924	0.0358	0.1617	0.0024	966.1	13.4	967.2	14	969.6	70.2	0.11373	0.360974	0.11373	966.1	13.4	Wang et al. (2016)
SC1-53	0.42	0.1169	0.0037	5.4548	0.086	0.3385	0.0048	1879.4	23.1	1893.5	13.5	1908.9	55.1	0.744653	1.54539	1.54539	1908.9	55.1	Wang et al. (2016)
SC1-54-1	1.31	0.062	0.0024	0.56	0.0147	0.0656	0.001	409.3	5.9	451.5	9.6	672.3	79.2	9.34662	39.1194	9.34662	409.3	5.9	Wang et al. (2016)
SC1-54-2	0.82	0.0548	0.0026	0.4793	0.0179	0.0635	0.001	396.9	6.2	397.6	12.3	401.8	100.5	0.176056	1.21951	0.176056	396.9	6.2	Wang et al. (2016)
SC1-55	0.53	0.0779	0.0025	1.9767	0.0324	0.1841	0.0026	1089.1	14	1107.6	11	1144	61.6	1.67028	4.79895	4.79895	1144	61.6	Wang et al. (2016)
SC1-56	0.65	0.0589	0.0021	0.4448	0.0099	0.0548	0.0008	343.7	4.8	373.7	6.9	563.7	74.7	8.02783	39.0279	8.02783	343.7	4.8	Wang et al. (2016)
SC1-57	0.24	0.0804	0.0025	0.7101	0.0111	0.064	0.0009	400.1	5.4	544.8	6.6	1207.5	60.4	26.5602	66.8654	26.5602	-	-	Wang et al. (2016)
SC1-58	0.17	0.0744	0.0024	1.6555	0.0277	0.1615	0.0023	965	12.6	991.6	10.6	1051	62.9	2.68253	8.18268	2.68253	965	12.6	Wang et al. (2016)
SC1-59	0.45	0.1242	0.0039	6.2678	0.0976	0.3659	0.0052	2010.3	24.4	2014	13.6	2017.6	54.2	0.183714	0.361816	0.361816	2017.6	54.2	Wang et al. (2016)
SC1-60	0.57	0.0583	0.002	0.5829	0.0128	0.0726	0.001	451.5	6.3	466.3	8.2	539	75.4	3.17392	16.2338	3.17392	451.5	6.3	Wang et al. (2016)
SC2-1	1.08	0.0563	0.0027	0.4388	0.0167	0.0565	0.0009	354.5	5.6	369.4	11.8	462.7	102.9	4.03357	23.3845	4.03357	354.5	5.6	Wang et al. (2016)
SC2-2	0.46	0.1152	0.0038	5.1711	0.0898	0.3256	0.0047	1816.8	22.8	1847.9	14.8	1882.7	57.5	1.68299	3.50029	3.50029	1882.7	57.5	Wang et al. (2016)
SC2-3	0.69	0.1685	0.0053	10.1959	0.1577	0.4389	0.0062	2345.7	27.7	2452.7	14.3	2542.3	51.9	4.36254	7.73316	7.73316	2542.3	51.9	Wang et al. (2016)
SC2-4	0.85	0.114	0.0038	4.6214	0.0879	0.2939	0.0044	1661.2	21.7	1753.1	15.9	1864.2	59.2	5.24214	10.8894	10.8894	-	-	Wang et al. (2016)
SC2-5	0.85	0.1644	0.0052	9.4088	0.1475	0.415	0.0059	2237.9	26.8	2378.7	14.4	2501.2	52.3	5.9192	10.5269	10.5269	-	-	Wang et al. (2016)
SC2-6	0.65	0.1644	0.0052	9.8513	0.1486	0.4346	0.0061	2326.2	27.3	2421	13.9	2501.3	51.8	3.91574	7.00036	7.00036	2501.3	51.8	Wang et al. (2016)
SC2-7	0.39	0.1708	0.0055	10.9879	0.1818	0.4665	0.0068	2468.3	30	2522.1	15.4	2565.4	52.5	2.13314	3.78498	3.78498	2565.4	52.5	Wang et al. (2016)
SC2-8	0.37	0.1757	0.0055	11.0318	0.1727	0.4553	0.0065	2418.6	28.8	2525.8	14.6	2612.8	51.6	4.2442	7.43264	7.43264	2612.8	51.6	Wang et al. (2016)
SC2-9	0.14	0.119	0.0038	5.3865	0.0876	0.3282	0.0047	1829.8	22.7	1882.7	13.9	1941.2	56	2.80979	5.73872	5.73872	1941.2	56	Wang et al. (2016)
SC2-10	0.58	0.1704	0.0054	10.6808	0.1678	0.4546	0.0065	2415.9	28.8	2495.8	14.6	2561.1	51.9	3.20138	5.66944	5.66944	2561.1	51.9	Wang et al. (2016)
SC2-11	0.29	0.0731	0.0029	1.2435	0.0354	0.1234	0.002	750.2	11.2	820.5	16	1015.5	78.5	8.56795	26.1251	8.56795	750.2	11.2	Wang et al. (2016)
Site 5: Haigang, Qinhuangdao
Sample	Th/U	207Pb/206Pb	Error	207Pb/235U	Error	206Pb/238U	Error	238U-206Pb date	Error	235U-207Pb date	Error	207Pb-206Pb date	Error	Discordance 1 (238U–206Pb vs 235U–207Pb)	Discordance 2 (238U–206Pb vs 207Pb–206Pb)	Discordance	Preferred Age	Error	Data source
Name			1σ		1σ		1σ	(Ma)	1σ	(Ma)	1σ	(Ma)	1σ	(%)	(%)	(%)	(Ma)	1σ
1.1	0.45	0.0552	0.0019	0.3893	0.0135	0.051	0.0005	321	3	334	10	420	76	3.89222	23.5714	3.89222	321	3	Liu et al. (2014)
2.1	0.72	0.0539	0.0016	0.3691	0.0103	0.0499	0.0004	314	3	319	8	369	67	1.5674	14.9051	1.5674	314	3	Liu et al. (2014)
3.1	0.48	0.0561	0.0012	0.5517	0.0113	0.0712	0.0005	443	3	446	7	457	46	0.672646	3.06346	0.672646	443	3	Liu et al. (2014)
4.1	0.45	0.0542	0.001	0.5294	0.0104	0.0706	0.0005	440	3	431	7	389	44	-2.08817	-13.1105	-2.08817	440	3	Liu et al. (2014)
5.1	0.59	0.0579	0.002	0.4059	0.0144	0.0507	0.0005	319	3	346	10	528	81	7.80347	39.5833	7.80347	319	3	Liu et al. (2014)
6.1	0.52	0.0549	0.0011	0.5336	0.0108	0.0705	0.0006	439	4	434	7	409	46	-1.15207	-7.33496	-1.15207	439	4	Liu et al. (2014)
7.1	0.73	0.0542	0.0022	0.3817	0.0173	0.0508	0.0005	319	3	328	13	389	97	2.7439	17.9949	2.7439	319	3	Liu et al. (2014)
8.1	0.76	0.0527	0.0017	0.5204	0.0164	0.0719	0.0007	448	4	425	11	317	72	-5.41176	-41.3249	-5.41176	448	4	Liu et al. (2014)
9.1	0.5	0.0576	0.0013	0.5681	0.0122	0.0715	0.0005	445	3	457	8	522	48	2.62582	14.751	2.62582	445	3	Liu et al. (2014)
10.1	0.45	0.0577	0.0011	0.566	0.0103	0.071	0.0005	442	3	455	7	517	45	2.85714	14.5068	2.85714	442	3	Liu et al. (2014)
11.1	1.3	0.0543	0.0014	0.3715	0.0101	0.0495	0.0004	311	2	321	7	383	61	3.11526	18.799	3.11526	311	2	Liu et al. (2014)
12.1	0.38	0.1816	0.0021	12.583	0.149	0.5005	0.0031	2616	13	2649	11	2733	19	1.24575	4.28101	4.28101	2733	19	Liu et al. (2014)
13.1	0.56	0.058	0.0011	0.5684	0.0109	0.071	0.0005	442	3	457	7	528	43	3.28228	16.2879	3.28228	442	3	Liu et al. (2014)
14.1	0.38	0.0611	0.0014	0.591	0.0128	0.0706	0.0007	440	4	472	8	643	55	6.77966	31.5708	6.77966	440	4	Liu et al. (2014)
15.1	0.6	0.0577	0.0017	0.5606	0.0161	0.0708	0.0006	441	4	452	11	520	65	2.43363	15.1923	2.43363	441	4	Liu et al. (2014)
16.1	0.46	0.0598	0.0012	0.582	0.0114	0.0704	0.0005	439	3	466	7	594	43	5.79399	26.0943	5.79399	439	3	Liu et al. (2014)
Site 6: Nanpiao, Huludao
Sample	Th/U	207Pb/206Pb	Error	207Pb/235U	Error	206Pb/238U	Error	238U-206Pb date	Error	235U-207Pb date	Error	207Pb-206Pb date	Error	Discordance 1 (238U–206Pb vs 235U–207Pb)	Discordance 2 (238U–206Pb vs 207Pb–206Pb)	Discordance	Preferred Age	Error	Data source
Name			1σ		1σ		1σ	(Ma)	1σ	(Ma)	1σ	(Ma)	1σ	(%)	(%)	(%)	(Ma)	1σ
1.1	0.3	0.0553	0.0029	0.3733	0.019	0.0495	0.0006	311	4	322	14	433	147	3.41615	28.1755	3.41615	311	4	Liu et al. (2014)
2.1	0.92	0.164	0.0025	9.5742	0.1561	0.4225	0.0035	2272	16	2395	15	2497	26	5.1357	9.01081	9.01081	2497	26	Liu et al. (2014)
3.1	0.63	0.0988	0.0024	0.8982	0.0283	0.0669	0.002	417	12	651	15	2000	44	35.9447	79.15	35.9447	-	-	Liu et al. (2014)
4.1	0.97	0.1713	0.0021	9.4367	0.1201	0.3982	0.0024	2161	11	2381	12	2572	21	9.23982	15.9798	15.9798	-	-	Liu et al. (2014)
5.1	0.72	0.0541	0.0025	0.3679	0.0164	0.05	0.0005	314	3	318	12	372	106	1.25786	15.5914	1.25786	314	3	Liu et al. (2014)
6.1	0.67	0.0562	0.0016	0.4876	0.0136	0.0631	0.0006	394	3	403	9	461	65	2.23325	14.5336	2.23325	394	3	Liu et al. (2014)
7.1	0.61	0.0735	0.0023	0.6382	0.0215	0.0627	0.0008	392	5	501	13	1029	68	21.7565	61.9048	21.7565	-	-	Liu et al. (2014)
8.1	0.34	0.06	0.001	0.5402	0.0087	0.0652	0.0004	407	2	439	6	606	35	7.28929	32.8383	7.28929	407	2	Liu et al. (2014)
9.1	0.52	0.1682	0.0019	11.512	0.135	0.4944	0.0029	2590	12	2566	11	2540	19	-0.935308	-1.9685	-1.9685	2540	19	Liu et al. (2014)
10.1	0.42	0.0558	0.0022	0.5019	0.0191	0.066	0.0007	412	4	413	13	443	91	0.242131	6.99774	0.242131	412	4	Liu et al. (2014)
11.1	0.86	0.1766	0.0021	9.9811	0.1258	0.4084	0.0029	2208	13	2433	12	2621	20	9.24784	15.7573	15.7573	-	-	Liu et al. (2014)
12.1	0.75	0.0533	0.0018	0.3428	0.0113	0.0475	0.0004	300	3	299	9	342	59	-0.334448	12.2807	-0.334448	300	3	Liu et al. (2014)
13.1	0.41	0.1688	0.0022	10.768	0.151	0.4605	0.0033	2442	15	2503	13	2546	22	2.43708	4.08484	4.08484	2546	22	Liu et al. (2014)
14.1	0.51	0.1691	0.002	10.162	0.125	0.4343	0.0027	2325	12	2450	11	2550	20	5.10204	8.82353	8.82353	2550	20	Liu et al. (2014)
15.1	0.34	0.1725	0.002	9.9748	0.1461	0.4176	0.004	2250	18	2432	14	2583	24	7.48355	12.892	12.892	-	-	Liu et al. (2014)
16.1	0.94	0.1864	0.002	10.637	0.161	0.4131	0.0051	2229	23	2492	14	2711	18	10.5538	17.7794	17.7794	-	-	Liu et al. (2014)
17.1	0.36	0.1628	0.0018	11.044	0.131	0.4906	0.0032	2573	14	2527	11	2485	20	-1.82034	-3.54125	-3.54125	2485	20	Liu et al. (2014)
18.1	0.73	0.057	0.0014	0.4875	0.0116	0.062	0.0004	388	3	403	8	500	54	3.72208	22.4	3.72208	388	3	Liu et al. (2014)
Site 7: Pingquan, Chengde
Sample	Th/U	207Pb/206Pb	Error	207Pb/235U	Error	206Pb/238U	Error	238U-206Pb date	Error	235U-207Pb date	Error	207Pb-206Pb date	Error	Discordance 1 (238U–206Pb vs 235U–207Pb)	Discordance 2 (238U–206Pb vs 207Pb–206Pb)	Discordance	Preferred Age	Error	Data source
Name			1σ		1σ		1σ	(Ma)	1σ	(Ma)	1σ	(Ma)	1σ	(%)	(%)	(%)	(Ma)	1σ
BX9 01	0.118661	0.0542	0.00127	0.44615	0.00958	0.05967	0.00109	373.6	6.62	374.6	6.73	379.3	51.59	0.266951	1.50277	0.266951	373.6	6.62	Ma et al. (2014)
BX9 02	0.998203	0.05366	0.00178	0.45166	0.01378	0.06101	0.00127	381.8	7.74	378.4	9.64	356.9	73.04	-0.89852	-6.97674	-0.89852	381.8	7.74	Ma et al. (2014)
BX9 03	3.72981	0.05444	0.00354	0.48463	0.02939	0.06454	0.00195	403.2	11.83	401.2	20.1	389.1	139.55	-0.498504	-3.62375	-0.498504	403.2	11.83	Ma et al. (2014)
BX9 04	2.69805	0.05463	0.00226	0.47549	0.01823	0.0631	0.00146	394.5	8.85	395	12.55	397	89.71	0.126582	0.629723	0.126582	394.5	8.85	Ma et al. (2014)
BX9 05	1.03915	0.05296	0.00135	0.44335	0.01039	0.06069	0.00114	379.8	6.9	372.6	7.31	326.9	56.64	-1.93237	-16.1823	-1.93237	379.8	6.9	Ma et al. (2014)
BX9 06	0.27476	0.05176	0.00199	0.33698	0.01198	0.0472	0.00104	297.3	6.41	294.9	9.1	274.7	85.79	-0.813835	-8.22716	-0.813835	297.3	6.41	Ma et al. (2014)
BX9 07	0.933236	0.16208	0.0018	10.4071	0.11013	0.4655	0.00782	2463.8	34.41	2471.7	9.8	2477.4	18.63	0.319618	0.548963	0.548963	2477.4	18.63	Ma et al. (2014)
BX9 08	0.45374	0.15783	0.0019	9.9481	0.11374	0.45694	0.00785	2426.1	34.71	2430	10.55	2432.6	20.25	0.160494	0.267204	0.267204	2432.6	20.25	Ma et al. (2014)
BX9 09	1.08085	0.05507	0.00172	0.45995	0.01316	0.06055	0.00124	379	7.53	384.2	9.15	415.1	67.66	1.35346	8.6967	1.35346	379	7.53	Ma et al. (2014)
BX9 10	1.80334	0.05485	0.00273	0.45765	0.02109	0.06049	0.00155	378.6	9.44	382.6	14.69	406.2	107.42	1.04548	6.79468	1.04548	378.6	9.44	Ma et al. (2014)
BX9 11	0.745803	0.05457	0.0012	0.46993	0.00952	0.06243	0.00112	390.4	6.81	391.1	6.58	394.7	48.36	0.178982	1.08944	0.178982	390.4	6.81	Ma et al. (2014)
BX9 12	0.713804	0.05581	0.00236	0.49796	0.01927	0.06469	0.00158	404.1	9.57	410.3	13.06	444.3	91.29	1.51109	9.04794	1.51109	404.1	9.57	Ma et al. (2014)
BX9 13	0.678801	0.15351	0.00421	9.32917	0.23994	0.4406	0.0116	2353.3	51.91	2370.9	23.59	2385.4	45.93	0.742334	1.34569	1.34569	2385.4	45.93	Ma et al. (2014)
BX9 14	0.469318	0.14148	0.00306	8.08581	0.16342	0.41433	0.00915	2234.7	41.7	2240.7	18.26	2245.4	36.86	0.267773	0.47653	0.47653	2245.4	36.86	Ma et al. (2014)
BX9 15	1.14339	0.05452	0.00177	0.47221	0.01409	0.06279	0.00131	392.6	7.95	392.7	9.72	392.7	70.63	0.0254647	0.0254647	0.0254647	392.6	7.95	Ma et al. (2014)
BX9 16	67.1439	0.05447	0.00314	0.44631	0.02401	0.05941	0.00161	372	9.81	374.7	16.85	390.3	123.98	0.720576	4.6887	0.720576	372	9.81	Ma et al. (2014)
BX9 17	0.462277	0.10621	0.00128	3.82118	0.04275	0.26083	0.00433	1494.1	22.16	1597.2	9	1735.4	21.91	6.45505	13.9046	13.9046	-	-	Ma et al. (2014)
BX9 18	0.509506	0.05465	0.00162	0.46082	0.01255	0.06113	0.00122	382.5	7.42	384.8	8.72	398.1	64.29	0.597713	3.91861	0.597713	382.5	7.42	Ma et al. (2014)
BX9 19	2.85825	0.06254	0.00326	0.52323	0.02474	0.06066	0.00174	379.6	10.55	427.3	16.49	692.7	107.48	11.1631	45.1999	11.1631	-	-	Ma et al. (2014)
BX9 20	0.274855	0.07982	0.00247	0.86399	0.0239	0.07848	0.00173	487	10.32	632.3	13.02	1192.6	59.96	22.9796	59.1648	22.9796	-	-	Ma et al. (2014)
BX9 21	352.571	0.71263	0.02431	23.4015	0.5856	0.23809	0.00881	1376.7	45.87	3243.8	24.37	4756.4	48.09	57.559	71.0558	71.0558	-	-	Ma et al. (2014)
BX9 22	7.45686	0.0546	0.0089	0.48583	0.07378	0.06452	0.00431	403	26.12	402.1	50.42	395.7	329.1	-0.223825	-1.84483	-0.223825	403	26.12	Ma et al. (2014)
BX9 23	0.934137	0.10224	0.00294	4.18398	0.11109	0.2967	0.00704	1674.9	34.98	1670.9	21.76	1665.2	52.35	-0.239392	-0.582513	-0.582513	1665.2	52.35	Ma et al. (2014)
BX9 24	1.52031	0.0469	0.00243	0.40441	0.01982	0.06252	0.00149	391	9.06	344.8	14.33	43.7	119.5	-13.3991	-794.737	-13.3991	-	-	Ma et al. (2014)
BX9 25	0.290564	0.05137	0.00191	0.32382	0.01116	0.0457	0.00099	288.1	6.1	284.8	8.56	257.5	83.44	-1.15871	-11.8835	-1.15871	288	6	Ma et al. (2014)
BX9 26	0.744888	0.05378	0.00093	0.45393	0.00726	0.0612	0.00104	382.9	6.3	380	5.07	361.8	38.34	-0.763158	-5.83195	-0.763158	382.9	6.3	Ma et al. (2014)
BX9 27	1.13415	0.0541	0.0013	0.44606	0.00987	0.05978	0.0011	374.3	6.71	374.5	6.93	375.2	53.02	0.0534045	0.239872	0.0534045	374.3	6.71	Ma et al. (2014)
BX9 28	0.271789	0.14875	0.00189	8.88947	0.10691	0.43331	0.00758	2320.6	34.09	2326.7	10.98	2331.6	21.59	0.262174	0.471779	0.471779	2331.6	21.59	Ma et al. (2014)
BX9 29	3.14854	0.04661	0.00303	0.39331	0.02424	0.06119	0.00169	382.8	10.24	336.8	17.67	28.9	149.11	-13.658	-1224.57	-13.658	-	-	Ma et al. (2014)
BX9 30	1.87695	0.05549	0.00255	0.45944	0.01953	0.06003	0.00148	375.8	9	383.9	13.59	431.8	99.16	2.10992	12.969	2.10992	375.8	9	Ma et al. (2014)
BX9 31	77.6624	0.10916	0.01383	0.97533	0.11033	0.06479	0.00419	404.7	25.34	691.2	56.71	1785.3	214.67	41.4497	77.3315	41.4497	-	-	Ma et al. (2014)
BX9 32	0.702912	0.05255	0.0014	0.43133	0.01065	0.05952	0.00113	372.7	6.9	364.1	7.56	309.4	59.6	-2.36199	-20.459	-2.36199	372.7	6.9	Ma et al. (2014)
BX9 33	0.803285	0.05306	0.00163	0.44246	0.01252	0.06046	0.00123	378.4	7.48	372	8.81	331.5	68.64	-1.72043	-14.1478	-1.72043	378.4	7.48	Ma et al. (2014)
BX9 34	0.537906	0.05289	0.00212	0.43384	0.01601	0.05947	0.00138	372.4	8.38	365.9	11.34	324.2	88.61	-1.77644	-14.8674	-1.77644	372.4	8.38	Ma et al. (2014)
BX9 35	2.07348	0.05628	0.00333	0.45749	0.02502	0.05894	0.00173	369.2	10.52	382.5	17.43	462.7	126.93	3.47712	20.2075	3.47712	369.2	10.52	Ma et al. (2014)
BX9 36	0.412876	0.05601	0.00173	0.47987	0.01356	0.06213	0.00128	388.6	7.76	398	9.31	452.3	67.16	2.36181	14.0836	2.36181	388.6	7.76	Ma et al. (2014)
BX9 37	56.7428	0.0889	0.01177	0.58529	0.07071	0.04774	0.00287	300.6	17.66	467.9	45.29	1402	234.45	35.7555	78.5592	35.7555	-	-	Ma et al. (2014)
BX9 38	88.0345	0.05451	0.00941	0.47223	0.07766	0.06281	0.00374	392.7	22.68	392.7	53.56	392.2	346.85	0	-0.127486	0	392.7	22.68	Ma et al. (2014)
BX9 39	1.21188	0.0538	0.00183	0.36245	0.01137	0.04885	0.00102	307.4	6.29	314	8.48	362.8	74.76	2.10191	15.2701	2.10191	307.4	6.29	Ma et al. (2014)
BX9 40	0.824059	0.16051	0.00243	10.373	0.14944	0.46861	0.00889	2477.5	39.04	2468.6	13.34	2461	25.39	-0.360528	-0.670459	-0.670459	2461	25.39	Ma et al. (2014)
BX9 41	0.483187	0.15073	0.0024	6.8016	0.09918	0.32719	0.00616	1824.8	29.92	2085.9	12.91	2354.3	26.9	12.5174	22.4908	22.4908	-	-	Ma et al. (2014)
BX9 42	0.701911	0.05346	0.00312	0.34091	0.01825	0.04624	0.00135	291.4	8.31	297.9	13.82	348.4	125.99	2.18194	16.3605	2.18194	291.4	8.31	Ma et al. (2014)
BX9 43	0.817187	0.12318	0.00201	6.16322	0.09395	0.36281	0.00682	1995.5	32.24	1999.2	13.32	2002.8	28.7	0.185074	0.36449	0.36449	2002.8	28.7	Ma et al. (2014)
BX9 44	0.74153	0.15374	0.0017	9.52998	0.10087	0.44949	0.00759	2393	33.77	2390.4	9.73	2387.9	18.73	-0.108768	-0.213577	-0.213577	2387.9	18.73	Ma et al. (2014)
BX9 45	1.98851	0.05368	0.00136	0.45937	0.01079	0.06206	0.00117	388.1	7.08	383.8	7.51	357.4	56.36	-1.12038	-8.58982	-1.12038	388.1	7.08	Ma et al. (2014)
BX9 46	1.26472	0.14816	0.0032	8.83972	0.17946	0.43262	0.00967	2317.5	43.52	2321.6	18.52	2324.8	36.59	0.176602	0.314006	0.314006	2324.8	36.59	Ma et al. (2014)
BX9 47	1.12401	0.05533	0.0017	0.47769	0.01347	0.06261	0.00128	391.5	7.77	396.5	9.25	425.3	66.58	1.26103	7.94733	1.26103	391.5	7.77	Ma et al. (2014)
BX9 48	62.397	0.05407	0.02928	0.38147	0.19944	0.05116	0.00758	321.6	46.5	328.1	146.59	373.7	903.41	1.9811	13.9417	1.9811	321.6	46.5	Ma et al. (2014)
BX9 49	0.749716	0.16088	0.00199	10.3636	0.12231	0.46713	0.00821	2471	36.05	2467.8	10.93	2464.9	20.71	-0.12967	-0.247475	-0.247475	2464.9	20.71	Ma et al. (2014)
BX9 50	49.581	0.05313	0.0028	0.4529	0.02193	0.06182	0.0017	386.7	10.35	379.3	15.33	334.2	114.91	-1.95096	-15.7092	-1.95096	386.7	10.35	Ma et al. (2014)
BX9 51	0.850143	0.05066	0.00136	0.43326	0.01079	0.06201	0.00119	387.8	7.22	365.5	7.64	225.6	61.02	-6.10123	-71.8972	-6.10123	387.8	7.22	Ma et al. (2014)
BX9 52	1.11299	0.04879	0.03411	0.19239	0.13278	0.02859	0.00335	181.7	20.99	178.7	113.07	137.8	1129.03	-1.67879	-31.8578	-1.67879	182	21	Ma et al. (2014)
BX9 53	0.762467	0.10287	0.00346	4.2551	0.13211	0.29995	0.00787	1691	39.02	1684.7	25.53	1676.5	60.94	-0.373954	-0.864897	-0.864897	1676.5	60.94	Ma et al. (2014)
BX9 54	1.0346	0.05261	0.00097	0.45061	0.00775	0.06211	0.00107	388.5	6.52	377.7	5.43	311.8	41.52	-2.85941	-24.5991	-2.85941	388.5	6.52	Ma et al. (2014)
BX9 55	0.970621	0.1625	0.00352	9.61268	0.19448	0.42895	0.00976	2301	44.05	2398.4	18.61	2481.9	36.05	4.06104	7.28877	7.28877	2481.9	36.05	Ma et al. (2014)
BX9 56	0.92094	0.16057	0.00217	10.2757	0.13214	0.46405	0.00842	2457.4	37.08	2459.9	11.9	2461.7	22.62	0.10163	0.174676	0.174676	2461.7	22.62	Ma et al. (2014)
BX9 57	2.67053	0.11638	0.00449	1.03654	0.03399	0.06458	0.00176	403.4	10.67	722.2	16.94	1901.4	67.72	44.1429	78.7841	44.1429	-	-	Ma et al. (2014)
BX9 58	0.594166	0.11239	0.00156	5.00356	0.06489	0.32283	0.00567	1803.5	27.65	1819.9	10.97	1838.4	24.87	0.901148	1.89839	1.89839	1838.4	24.87	Ma et al. (2014)
BX9 59	0.516053	0.10541	0.00463	4.27683	0.17216	0.29422	0.00957	1662.6	47.69	1688.9	33.13	1721.5	78.6	1.55723	3.42143	3.42143	1721.5	78.6	Ma et al. (2014)
BX9 60	0.954448	0.05566	0.00369	0.46522	0.0286	0.06061	0.00191	379.3	11.62	387.9	19.82	438.6	141.6	2.21707	13.5203	2.21707	379.3	11.62	Ma et al. (2014)
BX9 61	0.48829	0.11746	0.00157	5.54173	0.06947	0.34214	0.00599	1896.9	28.77	1907.1	10.78	1917.9	23.74	0.534843	1.09495	1.09495	1917.9	23.74	Ma et al. (2014)
BX9 62	0.793674	0.05448	0.00149	0.46359	0.01171	0.06171	0.00121	386	7.33	386.8	8.13	390.8	60.12	0.206825	1.22825	0.206825	386	7.33	Ma et al. (2014)
BX9 63	0.738595	0.11105	0.00185	4.88577	0.07584	0.31903	0.00596	1785	29.15	1799.8	13.08	1816.7	29.98	0.822314	1.74492	1.74492	1816.7	29.98	Ma et al. (2014)
BX9 64	2.67569	0.15806	0.00217	10.0866	0.13207	0.46274	0.00845	2451.7	37.24	2442.7	12.1	2435	23.07	-0.368445	-0.685832	-0.685832	2435	23.07	Ma et al. (2014)
BX9 65	0.426464	0.15608	0.0022	5.99551	0.07718	0.27855	0.00503	1584	25.35	1975.2	11.2	2413.7	23.76	19.8056	34.3746	34.3746	-	-	Ma et al. (2014)
BX9 66	0.0878333	0.15583	0.00149	9.43734	0.08701	0.43918	0.00719	2347	32.23	2381.5	8.46	2410.9	16.11	1.44867	2.65046	2.65046	2410.9	16.11	Ma et al. (2014)
BX9 67	1.67157	0.12399	0.00642	4.05695	0.18978	0.23726	0.0085	1372.5	44.3	1645.7	38.11	2014.4	89.15	16.6008	31.8656	31.8656	-	-	Ma et al. (2014)
BX9 68	0.667269	0.15772	0.00185	9.56404	0.1071	0.43973	0.00761	2349.4	34.07	2393.7	10.29	2431.4	19.73	1.85069	3.37254	3.37254	2431.4	19.73	Ma et al. (2014)
BX9 69	0.856767	0.05343	0.0016	0.44348	0.01229	0.06019	0.00121	376.8	7.37	372.7	8.65	347.1	66.5	-1.10008	-8.55661	-1.10008	376.8	7.37	Ma et al. (2014)
BX9 70	0.418852	0.11583	0.00278	5.50287	0.1223	0.3445	0.00769	1908.3	36.87	1901	19.1	1892.9	42.5	-0.384008	-0.813566	-0.813566	1892.9	42.5	Ma et al. (2014)
BX9 71	0.282791	0.11115	0.00132	5.05694	0.05677	0.32993	0.00559	1838.1	27.09	1828.9	9.52	1818.2	21.36	-0.503035	-1.09449	-1.09449	1818.2	21.36	Ma et al. (2014)
BX9 72	2.97182	0.26822	0.0108	1.98401	0.05869	0.05364	0.0018	336.8	11	1110.1	19.97	3295.6	61.83	69.6604	89.7803	69.6604	-	-	Ma et al. (2014)
BX9 73	0.591116	0.04997	0.00181	0.44044	0.01477	0.06391	0.00139	399.4	8.44	370.6	10.41	193.8	82.13	-7.77118	-106.089	-7.77118	399.4	8.44	Ma et al. (2014)
BX9 74	5.29362	0.05465	0.00162	0.45415	0.01244	0.06026	0.00121	377.2	7.38	380.2	8.68	397.9	64.45	0.789058	5.20231	0.789058	377.2	7.38	Ma et al. (2014)
BX9 75	4.57211	0.05441	0.00278	0.45411	0.02145	0.06052	0.00159	378.8	9.69	380.2	14.98	388.1	110.17	0.368227	2.39629	0.368227	378.8	9.69	Ma et al. (2014)
BX9 76	0.771083	0.11918	0.00156	5.75188	0.07107	0.34998	0.00612	1934.5	29.24	1939.2	10.69	1943.9	23.22	0.242368	0.483564	0.483564	1943.9	23.22	Ma et al. (2014)
BX9 77	1.3798	0.05698	0.00118	0.46759	0.00894	0.05951	0.00108	372.7	6.54	389.5	6.18	490	45.18	4.31322	23.9388	4.31322	372.7	6.54	Ma et al. (2014)
BX9 78	0.496878	0.13304	0.00212	7.20054	0.108	0.39249	0.00743	2134.4	34.41	2136.6	13.37	2138.4	27.61	0.102967	0.187056	0.187056	2138.4	27.61	Ma et al. (2014)
BX9 79	1.39138	0.11031	0.00133	4.91989	0.05621	0.32341	0.00551	1806.4	26.83	1805.7	9.64	1804.6	21.77	-0.0387661	-0.0997451	-0.0997451	1804.6	21.77	Ma et al. (2014)
BX9 80	0.963556	0.12782	0.00342	6.55403	0.16263	0.37182	0.0091	2037.9	42.78	2053.2	21.86	2068.2	46.4	0.745178	1.46504	1.46504	2068.2	46.4	Ma et al. (2014)
BX9 81	0.699625	0.11126	0.0014	4.98694	0.05941	0.32502	0.0056	1814.2	27.25	1817.1	10.08	1820.1	22.71	0.159595	0.324158	0.324158	1820.1	22.71	Ma et al. (2014)
BX9 82	0.902154	0.16295	0.00426	10.387	0.25554	0.46222	0.012	2449.4	52.9	2469.9	22.79	2486.5	43.41	0.829993	1.49206	1.49206	2486.5	43.41	Ma et al. (2014)
BX9 83	0.528989	0.18302	0.00282	12.9843	0.19236	0.51446	0.01012	2675.7	43.07	2678.5	13.97	2680.4	25.29	0.104536	0.175347	0.175347	2680.4	25.29	Ma et al. (2014)
BX9 84	0.0384315	0.05784	0.00177	0.50337	0.01416	0.06311	0.00131	394.5	7.92	414	9.57	523.6	66.06	4.71014	24.6562	4.71014	394.5	7.92	Ma et al. (2014)
BX9 85	1.80247	0.0504	0.00351	0.40042	0.02617	0.05762	0.00176	361.1	10.73	342	18.97	213.3	153.65	-5.5848	-69.2921	-5.5848	361.1	10.73	Ma et al. (2014)
BX9 86	0.562142	0.16351	0.00201	10.574	0.12468	0.46896	0.0083	2479	36.43	2486.4	10.94	2492.2	20.54	0.297619	0.529653	0.529653	2492.2	20.54	Ma et al. (2014)
BX9 87	0.8156	0.05291	0.00169	0.45261	0.01339	0.06203	0.00128	388	7.8	379.1	9.36	324.9	71.1	-2.34767	-19.4214	-2.34767	388	7.8	Ma et al. (2014)
BX9 88	0.803398	0.14275	0.00292	8.34316	0.16046	0.42381	0.00916	2277.7	41.48	2269	17.44	2260.9	34.88	-0.383429	-0.743067	-0.743067	2260.9	34.88	Ma et al. (2014)
BX9 89	0.354311	0.05247	0.00321	0.35032	0.01991	0.04842	0.00141	304.8	8.68	305	14.97	305.9	133.49	0.0655738	0.359595	0.0655738	304.8	8.68	Ma et al. (2014)
BX9 90	0.4451	0.1122	0.00146	5.08983	0.06263	0.32897	0.00573	1833.4	27.81	1834.4	10.44	1835.3	23.42	0.0545137	0.103525	0.103525	1835.3	23.42	Ma et al. (2014)
BX9 91	7.45918	0.05611	0.0034	0.4624	0.02574	0.05973	0.00193	374	11.74	385.9	17.87	456.4	129.6	3.0837	18.0543	3.0837	374	11.74	Ma et al. (2014)
BX9 92	0.534257	0.12289	0.00659	0.81751	0.0366	0.04821	0.00178	303.6	10.92	606.7	20.45	1998.7	92.37	49.9588	84.8101	49.9588	-	-	Ma et al. (2014)
BX9 93	0.96872	0.0539	0.00112	0.45209	0.00866	0.06079	0.00124	380.5	7.56	378.7	6.05	366.7	46.07	-0.47531	-3.76329	-0.47531	380.5	7.56	Ma et al. (2014)
BX9 94	0.394219	0.05191	0.00257	0.33992	0.01554	0.04746	0.00131	298.9	8.04	297.1	11.78	281.5	109.39	-0.605857	-6.18117	-0.605857	298.9	8.04	Ma et al. (2014)
BX9 95	0.813991	0.05442	0.00145	0.44721	0.01102	0.05957	0.0013	373	7.9	375.3	7.73	388.2	58.65	0.612843	3.91551	0.612843	373	7.9	Ma et al. (2014)
BX9 96	0.805257	0.05437	0.00164	0.45785	0.01276	0.06104	0.00138	382	8.38	382.8	8.89	386.2	66.23	0.208986	1.08752	0.208986	382	8.38	Ma et al. (2014)
BX9 97	1.06817	0.05341	0.00134	0.45355	0.01047	0.06156	0.00132	385.1	8	379.8	7.32	346	55.7	-1.39547	-11.3006	-1.39547	385.1	8	Ma et al. (2014)
BX9 98	0.238448	0.10644	0.00192	4.32582	0.07261	0.29459	0.00632	1664.4	31.48	1698.3	13.84	1739.3	32.7	1.99611	4.30633	4.30633	1739.3	32.7	Ma et al. (2014)
BX9 99	0.4675	0.09839	0.00574	3.76217	0.20152	0.27715	0.01131	1577	57.06	1584.7	42.97	1593.9	105.23	0.485896	1.06029	1.06029	1593.9	105.23	Ma et al. (2014)
BX9 100	0.666616	0.15126	0.00186	9.25236	0.10917	0.44338	0.00882	2365.8	39.4	2363.3	10.81	2360.2	20.82	-0.105784	-0.237268	-0.237268	2360.2	20.82	Ma et al. (2014)
Site 8: Yingshouyingzi
Sample	Th/U	207Pb/206Pb	Error	207Pb/235U	Error	206Pb/238U	Error	238U-206Pb date	Error	235U-207Pb date	Error	207Pb-206Pb date	Error	Discordance 1 (238U–206Pb vs 235U–207Pb)	Discordance 2 (238U–206Pb vs 207Pb–206Pb)	Discordance	Preferred Age	Error	Data source
Name			1σ		1σ		1σ	(Ma)	1σ	(Ma)	1σ	(Ma)	1σ	(%)	(%)	(%)	(Ma)	1σ
1.1	0.34	0.052	0.0029	0.352	0.019	0.049	0.0007	309	4	306	14	285	99	-0.980392	-8.42105	-0.980392	309	4	Liu et al. (2014)
2.1	0.74	0.0571	0.0019	0.386	0.012	0.0491	0.0005	309	3	332	9	495	53	6.92771	37.5758	6.92771	309	3	Liu et al. (2014)
3.1	0.81	0.06	0.0055	0.395	0.035	0.0478	0.0012	301	7	338	26	604	153	10.9467	50.1656	10.9467	-	-	Liu et al. (2014)
4.1	0.69	0.0539	0.0039	0.362	0.026	0.0488	0.0009	307	5	314	19	366	127	2.2293	16.1202	2.2293	307	5	Liu et al. (2014)
5.1	0.35	0.0521	0.0061	0.341	0.039	0.0475	0.0014	299	8	298	30	290	206	-0.33557	-3.10345	-0.33557	299	8	Liu et al. (2014)
6.1	0.65	0.0551	0.0041	0.356	0.026	0.0469	0.0009	295	5	309	19	417	129	4.53074	29.2566	4.53074	295	5	Liu et al. (2014)
7.1	0.97	0.0527	0.0024	0.343	0.015	0.0472	0.0006	297	3	299	11	314	78	0.668896	5.41401	0.668896	297	3	Liu et al. (2014)
8.1	0.82	0.0537	0.0054	0.358	0.035	0.0484	0.0012	305	7	311	26	358	178	1.92926	14.8045	1.92926	305	7	Liu et al. (2014)
9.1	1	0.0573	0.0027	0.378	0.017	0.0478	0.0006	301	4	325	13	504	78	7.38462	40.2778	7.38462	301	4	Liu et al. (2014)
10.1	0.52	0.0555	0.0032	0.377	0.021	0.0492	0.0007	310	4	325	15	434	98	4.61538	28.5714	4.61538	310	4	Liu et al. (2014)
11.1	0.35	0.0579	0.0027	0.389	0.017	0.0487	0.0006	306	4	333	13	526	77	8.10811	41.8251	8.10811	306	4	Liu et al. (2014)
12.1	0.59	0.1578	0.002	7.971	0.074	0.3663	0.0025	2012	12	2228	8	2432	8	9.69479	17.2697	17.2697	-	-	Liu et al. (2014)
13.1	0.43	0.0535	0.0064	0.367	0.043	0.0498	0.0014	313	9	317	32	349	210	1.26183	10.3152	1.26183	313	9	Liu et al. (2014)
14.1	1.05	0.057	0.0019	0.376	0.012	0.0478	0.0005	301	3	324	9	493	54	7.09877	38.9452	7.09877	301	3	Liu et al. (2014)
15.1	0.93	0.0604	0.0069	0.405	0.045	0.0486	0.0014	306	9	345	32	618	190	11.3043	50.4854	11.3043	-	-	Liu et al. (2014)
16.1	0.7	0.0569	0.0044	0.374	0.028	0.0476	0.001	300	6	322	21	487	131	6.8323	38.3984	6.8323	300	6	Liu et al. (2014)
17.1	0.33	0.0533	0.0049	0.351	0.032	0.0477	0.0011	301	7	305	24	343	163	1.31148	12.2449	1.31148	301	7	Liu et al. (2014)
18.1	1.18	0.0518	0.0034	0.349	0.022	0.0489	0.0008	308	5	304	17	277	117	-1.31579	-11.1913	-1.31579	308	5	Liu et al. (2014)
19.1	0.62	0.0586	0.0048	0.395	0.031	0.0488	0.001	307	6	338	23	553	139	9.1716	44.4846	9.1716	307	6	Liu et al. (2014)
20.1	1.01	0.0516	0.0019	0.333	0.012	0.0468	0.0005	295	3	292	9	269	62	-1.0274	-9.66543	-1.0274	295	3	Liu et al. (2014)
21.1	0.81	0.059	0.004	0.391	0.026	0.048	0.0009	302	5	335	19	569	112	9.85075	46.9244	9.85075	302	5	Liu et al. (2014)
22.1	0.78	0.0611	0.0049	0.392	0.03	0.0465	0.001	293	6	336	22	643	131	12.7976	54.4323	12.7976	-	-	Liu et al. (2014)
23.1	0.34	0.0644	0.0025	0.443	0.016	0.0499	0.0005	314	3	373	11	756	82	15.8177	58.4656	15.8177	-	-	Liu et al. (2014)
24.1	0.88	0.0607	0.0054	0.411	0.036	0.0491	0.0009	309	5	349	26	627	197	11.4613	50.7177	11.4613	-	-	Liu et al. (2014)
25.1	0.99	0.0561	0.0031	0.369	0.02	0.0476	0.0007	300	4	319	15	458	93	5.95611	34.4978	5.95611	300	4	Liu et al. (2014)
Site 9: Western Beijing
Sample	Th/U	207Pb/206Pb	Error	207Pb/235U	Error	206Pb/238U	Error	238U-206Pb date	Error	235U-207Pb date	Error	207Pb-206Pb date	Error	Discordance 1 (238U–206Pb vs 235U–207Pb)	Discordance 2 (238U–206Pb vs 207Pb–206Pb)	Discordance	Preferred Age	Error	Data source
Name			1σ		1σ		1σ	(Ma)	1σ	(Ma)	1σ	(Ma)	1σ	(%)	(%)	(%)	(Ma)	1σ
1.1	1.28	0.0526	0.0011	0.3503	0.004	0.0483	0.0004	304	3	305	3	312	48	0.327869	2.5641	0.327869	304	3	Liu et al. (2014)
2.1	1.03	0.053	0.0012	0.352	0.0043	0.0482	0.0004	303	3	306	3	329	49	0.980392	7.90274	0.980392	303	3	Liu et al. (2014)
3.1	0.81	0.0543	0.0013	0.3621	0.0057	0.0484	0.0004	305	3	314	4	383	53	2.86624	20.3655	2.86624	305	3	Liu et al. (2014)
4.1	0.86	0.0537	0.0012	0.455	0.0058	0.0614	0.0005	384	3	381	4	360	49	-0.787402	-6.66667	-0.787402	384	3	Liu et al. (2014)
5.1	0.84	0.0534	0.0012	0.3849	0.005	0.0523	0.0005	328	3	331	4	347	50	0.906344	5.4755	0.906344	328	3	Liu et al. (2014)
6.1	1.14	0.0506	0.0011	0.3413	0.0041	0.049	0.0004	308	3	298	3	221	50	-3.3557	-39.3665	-3.3557	308	3	Liu et al. (2014)
7.1	1	0.0517	0.0011	0.3428	0.0042	0.0481	0.0004	303	3	299	3	270	50	-1.33779	-12.2222	-1.33779	303	3	Liu et al. (2014)
8.1	0.92	0.0547	0.0014	0.3654	0.0061	0.0485	0.0005	305	3	316	5	399	54	3.48101	23.5589	3.48101	305	3	Liu et al. (2014)
9.1	0.76	0.0574	0.0012	0.3735	0.0039	0.0472	0.0004	297	3	322	3	506	46	7.76398	41.3043	7.76398	297	3	Liu et al. (2014)
10.1	0.91	0.0558	0.0014	0.3613	0.0063	0.047	0.0004	296	3	313	5	443	55	5.43131	33.1828	5.43131	296	3	Liu et al. (2014)
11.1	0.89	0.0514	0.0011	0.3401	0.0043	0.048	0.0004	302	3	297	3	259	50	-1.6835	-16.6023	-1.6835	302	3	Liu et al. (2014)
12.1	0.7	0.053	0.0013	0.3551	0.0053	0.0486	0.0004	306	3	309	4	330	53	0.970874	7.27273	0.970874	306	3	Liu et al. (2014)
13.1	1.06	0.053	0.0012	0.3534	0.0045	0.0484	0.0004	305	3	307	3	327	50	0.651466	6.72783	0.651466	305	3	Liu et al. (2014)
14.1	1.5	0.0548	0.0012	0.3591	0.0044	0.0475	0.0004	299	3	312	3	406	48	4.16667	26.3547	4.16667	299	3	Liu et al. (2014)
15.1	0.69	0.0542	0.0014	0.3573	0.0065	0.0478	0.0005	301	3	310	5	380	57	2.90323	20.7895	2.90323	301	3	Liu et al. (2014)
16.1	1.44	0.0551	0.0012	0.3611	0.004	0.0475	0.0004	299	3	313	3	416	46	4.47284	28.125	4.47284	299	3	Liu et al. (2014)
17.1	1.16	0.0546	0.0012	0.362	0.0046	0.0481	0.0004	303	3	314	3	394	49	3.50318	23.0964	3.50318	303	3	Liu et al. (2014)
18.1	1.45	0.0518	0.0011	0.3439	0.0038	0.0482	0.0004	303	3	300	3	276	48	-1	-9.78261	-1	303	3	Liu et al. (2014)
19.1	1.22	0.0536	0.0012	0.3534	0.005	0.0478	0.0004	301	3	307	4	355	52	1.9544	15.2113	1.9544	301	3	Liu et al. (2014)
20.1	1.24	0.0543	0.0012	0.3621	0.0042	0.0484	0.0004	305	3	314	3	384	48	2.86624	20.5729	2.86624	305	3	Liu et al. (2014)
21.1	1.64	0.0528	0.0011	0.3447	0.0037	0.0473	0.0004	298	3	301	3	321	47	0.996678	7.16511	0.996678	298	3	Liu et al. (2014)
22.1	1.34	0.0529	0.0013	0.364	0.009	0.0499	0.001	314	6	315	7	326	56	0.31746	3.68098	0.31746	314	6	Liu et al. (2014)
23.1	0.94	0.0532	0.0016	0.346	0.01	0.0472	0.001	297	6	302	8	339	65	1.65563	12.3894	1.65563	297	6	Liu et al. (2014)
24.1	1.11	0.0544	0.0014	0.3706	0.0093	0.0494	0.001	311	6	320	7	388	56	2.8125	19.8454	2.8125	311	6	Liu et al. (2014)
25.1	0.95	0.0524	0.0013	0.3439	0.0087	0.0476	0.001	300	6	300	7	303	57	0	0.990099	0	300	6	Liu et al. (2014)
26.1	1.48	0.0551	0.0014	0.4641	0.0116	0.0611	0.0012	382	7	387	8	417	55	1.29199	8.39329	1.29199	382	7	Liu et al. (2014)
27.1	0.49	0.0551	0.002	0.3625	0.0132	0.0477	0.001	301	6	314	10	415	80	4.14013	27.4699	4.14013	301	6	Liu et al. (2014)
28.1	1.19	0.0521	0.0013	0.3455	0.0087	0.0481	0.001	303	6	301	7	290	57	-0.664452	-4.48276	-0.664452	303	6	Liu et al. (2014)
29.1	0.97	0.0528	0.0015	0.3398	0.0092	0.0467	0.001	294	6	297	7	321	61	1.0101	8.41121	1.0101	294	6	Liu et al. (2014)
30.1	0.84	0.0522	0.0014	0.3552	0.0097	0.0493	0.001	310	6	309	7	295	62	-0.323625	-5.08475	-0.323625	310	6	Liu et al. (2014)
31.1	0.87	0.0607	0.0014	0.4	0.0109	0.0479	0.0004	302	3	342	8	628	50	11.6959	51.9108	11.6959	-	-	Liu et al. (2014)
32.1	0.78	0.0564	0.0012	0.4723	0.0117	0.0607	0.0004	380	2	393	8	478	53	3.30789	20.5021	3.30789	380	2	Liu et al. (2014)
33.1	0.95	0.0551	0.001	0.3786	0.0075	0.0499	0.0004	314	2	326	6	417	34	3.68098	24.7002	3.68098	314	2	Liu et al. (2014)
34.1	0.83	0.0551	0.0018	0.3551	0.0122	0.0469	0.0005	295	3	309	9	417	74	4.53074	29.2566	4.53074	295	3	Liu et al. (2014)
35.1	1.47	0.0535	0.0012	0.351	0.0095	0.0475	0.0006	299	4	305	7	354	84	1.96721	15.5367	1.96721	299	4	Liu et al. (2014)
Site 10: Qingshuihe
Sample	Th/U	207Pb/206Pb	Error	207Pb/235U	Error	206Pb/238U	Error	238U-206Pb date	Error	235U-207Pb date	Error	207Pb-206Pb date	Error	Discordance 1 (238U–206Pb vs 235U–207Pb)	Discordance 2 (238U–206Pb vs 207Pb–206Pb)	Discordance	Preferred Age	Error	Data source
Name			1σ		1σ		1σ	(Ma)	1σ	(Ma)	1σ	(Ma)	1σ	(%)	(%)	(%)	(Ma)	1σ
1.1	0.8	0.1215	0.0025	5.6277	0.052	0.336	0.003	1867	14	1920	8	1978	36	2.76042	5.61173	5.61173	1978	36	Liu et al. (2014)
2.1	0.81	0.0581	0.0013	0.4155	0.0053	0.0519	0.0005	326	3	353	4	534	49	7.64873	38.9513	7.64873	326	3	Liu et al. (2014)
3.1	1.54	0.0578	0.0018	0.417	0.0099	0.0523	0.0005	329	3	354	7	524	65	7.06215	37.2137	7.06215	329	3	Liu et al. (2014)
4.1	0.76	0.055	0.0012	0.4012	0.0041	0.0529	0.0005	332	3	343	3	413	45	3.207	19.6126	3.207	332	3	Liu et al. (2014)
5.1	0.63	0.1175	0.0024	5.2087	0.0512	0.3216	0.0029	1798	14	1854	8	1918	37	3.0205	6.25652	6.25652	1918	37	Liu et al. (2014)
6.1	0.51	0.1102	0.0023	4.7098	0.045	0.3099	0.0028	1740	14	1769	8	1803	37	1.63934	3.49418	3.49418	1803	37	Liu et al. (2014)
7.1	1.11	0.1286	0.0026	4.4342	0.0406	0.2502	0.0022	1440	11	1719	8	2078	35	16.2304	30.7026	30.7026	-	-	Liu et al. (2014)
8.1	0.64	0.0521	0.0011	0.3757	0.0046	0.0524	0.0005	329	3	324	3	288	49	-1.54321	-14.2361	-1.54321	329	3	Liu et al. (2014)
9.1	0.8	0.0526	0.0012	0.3569	0.0051	0.0493	0.0005	310	3	310	4	310	52	0	0	0	310	3	Liu et al. (2014)
10.1	0.62	0.0549	0.0013	0.5183	0.0072	0.0685	0.0006	427	4	424	5	407	50	-0.707547	-4.914	-0.707547	427	4	Liu et al. (2014)
11.1	0.6	0.1444	0.0029	7.6613	0.0717	0.3849	0.0034	2099	16	2192	8	2280	35	4.2427	7.9386	7.9386	2280	35	Liu et al. (2014)
12.1	1.25	0.1588	0.0032	6.3194	0.0583	0.2886	0.0026	1634	13	2021	8	2443	34	19.1489	33.115	33.115	-	-	Liu et al. (2014)
13.1	0.8	0.1538	0.0031	8.9739	0.083	0.4233	0.0038	2275	17	2335	8	2388	34	2.56959	4.73199	4.73199	2388	34	Liu et al. (2014)
14.1	0.73	0.1138	0.0023	4.6714	0.0459	0.2978	0.0027	1680	13	1762	8	1861	37	4.6538	9.72595	9.72595	1861	37	Liu et al. (2014)
15.1	1.56	0.1284	0.0027	5.3864	0.0551	0.3042	0.0028	1712	14	1883	9	2077	36	9.08125	17.5734	17.5734	-	-	Liu et al. (2014)
16.1	0.88	0.0599	0.0013	0.4077	0.0052	0.0493	0.0004	310	3	347	4	602	47	10.6628	48.505	10.6628	-	-	Liu et al. (2014)
17.1	0.27	0.0489	0.0012	0.3296	0.0055	0.0489	0.0005	308	3	289	4	144	57	-6.57439	-113.889	-6.57439	308	3	Liu et al. (2014)
18.1	0.98	0.0552	0.0031	0.3596	0.0217	0.0468	0.0008	295	5	312	16	420	126	5.44872	29.7619	5.44872	295	5	Liu et al. (2014)
19.1	0.81	0.0527	0.0013	0.3657	0.0106	0.0498	0.0004	313	2	316	8	322	57	0.949367	2.79503	0.949367	313	2	Liu et al. (2014)
20.1	1.24	0.1132	0.0034	4.9634	0.1581	0.3189	0.004	1784	19	1813	27	1852	54	1.59956	3.67171	3.67171	1852	54	Liu et al. (2014)
21.1	0.68	0.1187	0.0009	5.4894	0.0952	0.3328	0.0026	1852	12	1899	15	1937	13	2.47499	4.38823	4.38823	1937	13	Liu et al. (2014)
22.1	0.34	0.1244	0.001	5.5892	0.1046	0.3234	0.0027	1806	13	1914	16	2021	14	5.64263	10.6383	10.6383	-	-	Liu et al. (2014)
Site 11: Qiaotou, Baode
Sample	Th/U	207Pb/206Pb	Error	207Pb/235U	Error	206Pb/238U	Error	238U-206Pb date	Error	235U-207Pb date	Error	207Pb-206Pb date	Error	Discordance 1 (238U–206Pb vs 235U–207Pb)	Discordance 2 (238U–206Pb vs 207Pb–206Pb)	Discordance	Preferred Age	Error	Data source
Name			1σ		1σ		1σ	(Ma)	1σ	(Ma)	1σ	(Ma)	1σ	(%)	(%)	(%)	(Ma)	1σ
N1‑1	1.05	0.054872	0.001077	0.364831	0.007296	0.0483	0.000421	304.1	2.6	315.8	5.4	405.6	44.4	3.70488	25.0247	3.70488	304.1	2.6	Jia et al. (2019)
N1‑2	0.56	0.05855	0.001894	0.390209	0.012459	0.048731	0.000508	306.7	3.1	334.5	9.1	550	70.4	8.31091	44.2364	8.31091	306.7	3.1	Jia et al. (2019)
N1‑3	0.84	0.054465	0.001253	0.363989	0.008306	0.048737	0.000486	306.8	3	315.2	6.2	390.8	51.8	2.66497	21.4944	2.66497	306.8	3	Jia et al. (2019)
N1‑4	0.66	0.054067	0.001863	0.372663	0.012658	0.05056	0.000633	318	3.9	321.6	9.4	372.3	77.8	1.1194	14.585	1.1194	318	3.9	Jia et al. (2019)
N1‑5	0.58	0.118767	0.001025	4.87513	0.051699	0.296774	0.002562	1938.9	14.8	1798	9	1675.3	12.8	-7.83648	-15.7345	-15.7345	-	-	Jia et al. (2019)
N1‑6	0.53	0.131229	0.00144	5.71046	0.080076	0.31391	0.00305	1759.9	15	1933	12.2	2114.5	52.3	8.95499	16.7699	16.7699	-	-	Jia et al. (2019)
N1‑7	0.48	0.12485	0.001146	5.48558	0.063523	0.31731	0.003168	2027.8	16.4	1898.3	10	1776.6	15.5	-6.82189	-14.1394	-14.1394	-	-	Jia et al. (2019)
N1‑8	0.71	0.115229	0.001266	5.04471	0.063574	0.317593	0.003162	1778	15.5	1826.9	10.8	1883.6	19.3	2.67667	5.60629	5.60629	1883.6	19.3	Jia et al. (2019)
N1‑9	0.37	0.121844	0.001119	5.36058	0.06275	0.31837	0.002987	1781.8	14.6	1878.6	10.1	1983.6	15.6	5.15277	10.1734	10.1734	-	-	Jia et al. (2019)
N1‑10	0.74	0.110167	0.001184	4.8989	0.059503	0.32156	0.002832	1797.3	13.8	1802.1	10.3	1802.2	19	0.266356	0.27189	0.27189	1802.2	19	Jia et al. (2019)
N1‑11	0.73	0.122517	0.001207	5.47027	0.068561	0.323051	0.002971	1804.6	14.5	1895.9	10.8	1994.4	17.6	4.81565	9.51665	9.51665	1994.4	17.6	Jia et al. (2019)
N1‑12	0.54	0.118072	0.001225	5.85475	0.068626	0.358284	0.003024	1974	14.4	1954.6	10.3	1927.8	18.5	-0.99253	-2.39651	-2.39651	1927.8	18.5	Jia et al. (2019)
N1‑13	1.25	0.115879	0.001204	5.74557	0.067903	0.35833	0.003127	1974.3	14.9	1938.2	10.3	1894.4	23.1	-1.86255	-4.21769	-4.21769	1894.4	23.1	Jia et al. (2019)
N1‑14	0.65	0.123868	0.00117	6.23268	0.072259	0.363138	0.003258	1997	15.4	2009	10.2	2012.7	16.7	0.597312	0.780047	0.780047	2012.7	16.7	Jia et al. (2019)
N1‑15	1.27	0.118116	0.001437	5.92097	0.083995	0.363452	0.003921	1998.5	18.6	1964.3	12.4	1928.1	22.1	-1.74108	-3.65126	-3.65126	1928.1	22.1	Jia et al. (2019)
N1‑16	0.57	0.112894	0.001537	5.02373	0.074051	0.323063	0.002998	1804.7	14.6	1823.3	12.5	1846.6	25.2	1.02013	2.26903	2.26903	1846.6	25.2	Jia et al. (2019)
N1‑17	0.56	0.112778	0.00108	5.05585	0.056487	0.323863	0.002733	1808.6	13.3	1828.7	9.6	1855.6	17.1	1.09914	2.53287	2.53287	1855.6	17.1	Jia et al. (2019)
N1‑18	0.81	0.112395	0.001071	5.06593	0.055716	0.32602	0.002786	1819.1	13.6	1830.4	9.4	1838.9	18.1	0.617351	1.07673	1.07673	1838.9	18.1	Jia et al. (2019)
N1‑19	0.76	0.111573	0.001443	5.03414	0.068879	0.326773	0.002958	1822.7	14.4	1825.1	11.7	1825	19.4	0.1315	0.126027	0.126027	1825	19.4	Jia et al. (2019)
N1‑20	0.66	0.111776	0.001218	5.09552	0.063926	0.330005	0.002936	1838.4	14.3	1835.4	10.7	1828.7	19.3	-0.163452	-0.530431	-0.530431	1828.7	19.3	Jia et al. (2019)
N1‑21	1.28	0.119699	0.001393	5.72769	0.070549	0.346438	0.00303	1917.6	14.5	1935.6	10.7	1951.6	20.5	0.929944	1.74216	1.74216	1951.6	20.5	Jia et al. (2019)
N1‑22	0.84	0.14925	0.00161	7.19429	0.088746	0.349574	0.003642	1932.6	17.4	2135.8	11.1	2338.9	23.1	9.514	17.3714	17.3714	-	-	Jia et al. (2019)
N1‑23	0.96	0.115972	0.001043	5.67822	0.059555	0.354474	0.003116	1955.9	14.9	1928.1	9.1	1894.8	21.3	-1.44183	-3.22461	-3.22461	1894.8	21.3	Jia et al. (2019)
N1‑24	0.58	0.134622	0.001368	6.63007	0.075709	0.356421	0.002863	1965.2	13.6	2063.4	10.2	2159	17.1	4.75914	8.97638	8.97638	2159	17.1	Jia et al. (2019)
N1‑25	0.22	0.118213	0.001052	5.73504	0.061842	0.351056	0.003019	1939.6	14.4	1936.7	9.4	1929.3	16.5	-0.149739	-0.533872	-0.533872	1929.3	16.5	Jia et al. (2019)
N1‑26	1.42	0.118933	0.001427	5.78004	0.073933	0.351934	0.003058	1943.8	14.6	1943.4	11.2	1940.4	20.5	-0.0205825	-0.175222	-0.175222	1940.4	20.5	Jia et al. (2019)
N1‑27	0.39	0.117832	0.00102	5.74184	0.062591	0.35239	0.003146	1946	15	1937.7	9.5	1924.1	15	-0.428343	-1.13819	-1.13819	1924.1	15	Jia et al. (2019)
N1‑28	0.61	0.118601	0.001204	5.79478	0.065775	0.353967	0.003024	1953.5	14.4	1945.6	9.9	1935.5	18.4	-0.406044	-0.929992	-0.929992	1935.5	18.4	Jia et al. (2019)
N1‑29	0.56	0.120012	0.001221	5.88138	0.068709	0.354501	0.002934	1956.1	14	1958.5	10.2	1966.7	18.5	0.122543	0.538974	0.538974	1966.7	18.5	Jia et al. (2019)
N1‑30	2.18	0.120311	0.001261	5.91563	0.073427	0.354783	0.003143	1957.4	15	1963.5	10.9	1960.8	18.4	0.31067	0.173399	0.173399	1960.8	18.4	Jia et al. (2019)
N1‑31	1.31	0.118418	0.001061	5.81152	0.061649	0.354803	0.002857	1957.5	13.6	1948.1	9.3	1932.4	16.8	-0.482521	-1.2989	-1.2989	1932.4	16.8	Jia et al. (2019)
N1‑32	0.72	0.119363	0.001269	5.85758	0.067439	0.355923	0.0029	1962.8	13.8	1955	10.1	1946.6	19.1	-0.398977	-0.83222	-0.83222	1946.6	19.1	Jia et al. (2019)
N1‑33	1.19	0.118997	0.001183	5.86045	0.068543	0.356175	0.00306	1964	14.6	1955.4	10.2	1942.6	17.4	-0.439808	-1.10162	-1.10162	1942.6	17.4	Jia et al. (2019)
N1‑34	0.69	0.119728	0.001135	5.90565	0.06238	0.356404	0.003047	1965.1	14.5	1962.1	9.3	1953.7	17	-0.152897	-0.583508	-0.583508	1953.7	17	Jia et al. (2019)
N1‑35	0.44	0.120708	0.001039	5.95865	0.060294	0.356407	0.003042	1965.1	14.5	1969.8	8.9	1968.5	15.9	0.238603	0.17272	0.17272	1968.5	15.9	Jia et al. (2019)
N1‑36	0.6	0.119373	0.001111	5.87801	0.064268	0.356677	0.002913	1966.4	13.9	1958	9.6	1946.6	16.7	-0.429009	-1.01716	-1.01716	1946.6	16.7	Jia et al. (2019)
N1‑37	1.04	0.155303	0.00132	7.97582	0.083227	0.371013	0.003312	2034.2	15.6	2228.3	9.5	2405.2	15	8.71068	15.4249	15.4249	-	-	Jia et al. (2019)
N1‑38	0.63	0.150218	0.001408	8.22382	0.0862	0.395655	0.003351	2149	15.5	2256	9.6	2350	16	4.74291	8.55319	8.55319	2350	16	Jia et al. (2019)
N1‑39	1.1	0.154534	0.001374	8.70996	0.090101	0.408572	0.003522	2208.4	16.2	2308.1	9.6	2398.2	14.8	4.31957	7.91427	7.91427	2398.2	14.8	Jia et al. (2019)
N1‑40	0.56	0.159594	0.001393	9.46326	0.098176	0.42851	0.003578	2299	16.2	2384	9.7	2451.5	14.8	3.56544	6.22068	6.22068	2451.5	14.8	Jia et al. (2019)
N1‑41	0.69	0.163079	0.001496	9.72593	0.128875	0.430299	0.004834	2307.1	21.8	2409.2	12.3	2488	15.4	4.23792	7.2709	7.2709	2488	15.4	Jia et al. (2019)
N1‑42	0.86	0.163151	0.001584	10.3268	0.128046	0.456967	0.004268	2426.2	18.9	2464.5	11.6	2488.6	16.4	1.55407	2.50743	2.50743	2488.6	16.4	Jia et al. (2019)
N1‑43	0.84	0.162203	0.00157	10.273	0.123432	0.45853	0.004265	2433.1	18.9	2459.7	11.2	2479.6	16.4	1.08143	1.8753	1.8753	2479.6	16.4	Jia et al. (2019)
N1‑44	0.88	0.20344	0.001943	14.3907	0.168047	0.510739	0.004816	2659.8	20.6	2775.8	11.2	2854	15.4	4.17898	6.80448	6.80448	2854	15.4	Jia et al. (2019)
N1‑45	0.49	0.161672	0.001224	10.3772	0.096601	0.464645	0.003606	2460	15.9	2469	8.8	2473.1	13.4	0.36452	0.5297	0.5297	2473.1	13.4	Jia et al. (2019)
N1‑46	0.6	0.159157	0.001585	10.2874	0.120796	0.467218	0.003907	2471.3	17.2	2461	11	2446.6	16.7	-0.418529	-1.00956	-1.00956	2446.6	16.7	Jia et al. (2019)
N1‑47	0.47	0.160279	0.001281	10.3573	0.100441	0.467494	0.003802	2472.6	16.8	2467.2	9.1	2458.3	8.2	-0.218872	-0.581703	-0.581703	2458.3	8.2	Jia et al. (2019)
N1‑48	0.87	0.158703	0.001745	10.251	0.129562	0.467832	0.004021	2474	17.7	2457.7	11.8	2441.7	13.4	-0.663222	-1.32285	-1.32285	2441.7	13.4	Jia et al. (2019)
N1‑49	0.65	0.156983	0.001489	10.1564	0.109627	0.468617	0.004068	2477.5	17.9	2449.1	10.1	2423.1	16	-1.15961	-2.24506	-2.24506	2423.1	16	Jia et al. (2019)
N1‑50	0.75	0.15867	0.001319	10.297	0.105931	0.46917	0.003975	2479.9	17.5	2461.8	9.7	2442.6	13.9	-0.735234	-1.52706	-1.52706	2442.6	13.9	Jia et al. (2019)
N1‑51	0.84	0.158256	0.001408	10.2498	0.109391	0.469619	0.004097	2481.9	18	2457.6	10	2438.9	15.9	-0.98877	-1.76309	-1.76309	2438.9	15.9	Jia et al. (2019)
Site 12: Shuozhou
Sample	Th/U	207Pb/206Pb	Error	207Pb/235U	Error	206Pb/238U	Error	238U-206Pb date	Error	235U-207Pb date	Error	207Pb-206Pb date	Error	Discordance 1 (238U–206Pb vs 235U–207Pb)	Discordance 2 (238U–206Pb vs 207Pb–206Pb)	Discordance	Preferred Age	Error	Data source
Name			1σ		1σ		1σ	(Ma)	1σ	(Ma)	1σ	(Ma)	1σ	(%)	(%)	(%)	(Ma)	1σ
KCP-1.1	0.82	0.0543	0.0031494	0.539	0.034496	0.072	0.001872	448	11	437.749	25.3895	384	130	-2.34165	-16.6667	-2.34165	448	11	Wang et al. (2016)
KCP-1.1	2.49	0.1165	0.001864	5.45	0.15805	0.3393	0.0081432	1883	39	1892.69	30.283	1903	28	0.51187	1.05097	1.05097	1903	28	Wang et al. (2016)
KCP-2.1	0.85	0.054	0.00135	0.518	0.017094	0.0697	0.0014637	434.1	8.7	423.799	10.595	370	57	-2.43054	-17.3243	-2.43054	434.1	8.7	Wang et al. (2016)
KCP-3.1	1.12	0.0504	0.0039312	0.357	0.028917	0.0514	0.0011308	323.3	7	309.961	24.177	214	180	-4.30329	-51.0748	-4.30329	323.3	7	Wang et al. (2016)
KCP-4.1	1.08	0.0562	0.0020232	0.549	0.023058	0.0708	0.0014868	440.7	9	444.326	15.9957	462	80	0.815965	4.61039	0.815965	440.7	9	Wang et al. (2016)
KCP-5.1	0.64	0.0572	0.0028028	0.553	0.029862	0.07	0.00161	436.3	9.7	446.944	21.9003	501	110	2.38153	12.9142	2.38153	436.3	9.7	Wang et al. (2016)
KCP-6.1	1.48	0.0473	0.008514	0.357	0.06426	0.0547	0.0014222	343.6	8.7	309.961	55.7931	66	420	-10.8525	-420.606	-10.8525	-	-	Wang et al. (2016)
KCP-7.1	0.92	0.1076	0.0029052	4.83	0.17871	0.3255	0.007812	1817	39	1790.07	48.332	1759	50	-1.50419	-3.29733	-3.29733	1759	50	Wang et al. (2016)
KCP-8.1	1	0.0632	0.0036656	0.423	0.026649	0.0486	0.0012636	305.6	7.9	358.181	20.7745	716	120	14.6801	57.3184	14.6801	-	-	Wang et al. (2016)
KCP-10.1	0.55	0.1172	0.0016408	5.98	0.16744	0.3701	0.0092525	2030	43	1972.87	27.6202	1915	25	-2.89584	-6.00522	-6.00522	1915	25	Wang et al. (2016)
KCP-11.1	1.04	0.0562	0.0038778	0.587	0.043438	0.0757	0.0020439	470	12	468.933	32.3564	460	150	-0.227459	-2.17391	-0.227459	470	12	Wang et al. (2016)
KCP-12.1	0.77	0.0541	0.004869	0.558	0.051894	0.0748	0.0019448	465	11	450.208	40.5187	375	200	-3.28563	-24	-3.28563	465	11	Wang et al. (2016)
KCP-13.1	0.91	0.0561	0.0021318	0.547	0.024068	0.0707	0.0016261	440.4	9.9	443.014	16.8345	458	84	0.589987	3.84279	0.589987	440.4	9.9	Wang et al. (2016)
KCP-14.1	0.37	0.0577	0.0042698	0.63	0.04914	0.0792	0.0020592	492	12	496.078	36.7098	517	160	0.822096	4.83559	0.822096	492	12	Wang et al. (2016)
KCP-15.1	0.36	0.1268	0.00105244	3.847	0.092328	0.22	0.00484	1282	26	1602.58	13.3014	2055	15	20.0041	37.6156	37.6156	-	-	Wang et al. (2016)
KCP-16.1	0.65	0.1054	0.002635	5.22	0.2088	0.359	0.011129	1978	53	1855.82	46.3955	1722	47	-6.58358	-14.8664	-14.8664	-	-	Wang et al. (2016)
KCP-17.1	0.84	0.0626	0.004382	0.738	0.054612	0.0855	0.0021375	529	13	561.218	39.2852	695	150	5.7407	23.8849	5.7407	529	13	Wang et al. (2016)
KCP-18.1	0.6	0.0526	0.0032612	0.528	0.035376	0.0727	0.0018175	453	11	430.466	26.6889	312	140	-5.23475	-45.1923	-5.23475	453	11	Wang et al. (2016)
KCP-19.1	0.6	0.0529	0.0047081	0.512	0.047104	0.0701	0.0017525	437	10	419.778	37.3603	325	200	-4.10259	-34.4615	-4.10259	437	10	Wang et al. (2016)
KCP-20.1	0.41	0.0521	0.0045848	0.516	0.046956	0.0719	0.0017256	448	10	422.461	37.1765	289	200	-6.04535	-55.0173	-6.04535	448	10	Wang et al. (2016)
KCP-21.1	0.94	0.052	0.00468	0.464	0.043152	0.0646	0.0015504	403.6	9.5	387.022	34.832	287	210	-4.28341	-40.6272	-4.28341	403.6	9.5	Wang et al. (2016)
KCP-23.1	0.63	0.1307	0.0015684	3.486	0.08715	0.1935	0.004257	1140	23	1524	18.288	2107	21	25.1967	45.8946	45.8946	-	-	Wang et al. (2016)
KCP-23.1	0.81	0.0542	0.0031436	0.499	0.030938	0.0668	0.0015364	416.9	9.4	411.011	23.8386	378	130	-1.4329	-10.291	-1.4329	416.9	9.4	Wang et al. (2016)
KCP-23.1	0.55	0.0513	0.0022572	0.423	0.020727	0.0598	0.0013754	374.2	8.3	358.181	15.76	254	100	-4.47225	-47.3228	-4.47225	374.2	8.3	Wang et al. (2016)
KCP-26.1	0.54	0.0553	0.0047558	0.541	0.048149	0.071	0.001704	442	10	439.068	37.7599	423	190	-0.667762	-4.49173	-0.667762	442	10	Wang et al. (2016)
KCP-27.1	1.39	0.1635	0.0073575	10.84	0.7046	0.481	0.022607	2532	99	2509.41	112.924	2492	76	-0.900074	-1.60514	-1.60514	2492	76	Wang et al. (2016)
KCP-28.1	0.4	0.146	0.001898	8.91	0.32076	0.443	0.014619	2362	66	2328.74	30.2737	2299	23	-1.4281	-2.74032	-2.74032	2299	23	Wang et al. (2016)
KCP-29.1	0.6	0.049	0.0049	0.481	0.05291	0.0713	0.0017112	444	10	398.745	39.8745	146	240	-11.3495	-204.11	-11.3495	-	-	Wang et al. (2016)
KCP-22.1	0.79	0.0563	0.0018016	0.526	0.02104	0.0678	0.0015594	423	9.4	429.136	13.7324	462	71	1.42993	8.44156	1.42993	423	9.4	Wang et al. (2016)
KCP-23.1	1.04	0.0526	0.005786	0.366	0.04026	0.0504	0.0011592	317.2	7.2	316.673	34.8341	313	250	-0.16633	-1.34185	-0.16633	317.2	7.2	Wang et al. (2016)
KCP-1	0.93	0.1194	0.005	5.6792	0.2438	0.342	0.0048	1896.5	22.9	1928.2	37.1	1947.8	74.2	1.64402	2.63374	2.63374	1947.8	74.2	Wang et al. (2016)
KCP-2	0.46	0.0689	0.0043	0.5218	0.0323	0.0549	0.001	344.7	5.8	426.3	21.6	898.2	129.6	19.1414	61.6232	19.1414	-	-	Wang et al. (2016)
KCP-3	1.19	0.0746	0.0032	0.5237	0.0228	0.0504	0.0007	317.2	4.3	427.6	15.2	1058.3	85.2	25.8185	70.0274	25.8185	-	-	Wang et al. (2016)
KCP-4	0.79	0.1403	0.0034	6.612	0.168	0.3383	0.004	1878.4	19.2	2061	22.4	2231.2	42.6	8.85978	15.8121	15.8121	-	-	Wang et al. (2016)
KCP-5	0.75	0.1972	0.0179	1.9936	0.2089	0.0626	0.0019	391.4	11.3	1113.4	71	2803.4	150.2	64.8464	86.0384	64.8464	-	-	Wang et al. (2016)
KCP-6	0.75	0.0854	0.0036	0.5999	0.0273	0.0502	0.0008	315.8	4.8	477.2	17.3	1324.1	83.3	33.8223	76.1498	33.8223	-	-	Wang et al. (2016)
KCP-7	0.6	0.1423	0.0044	4.3298	0.1467	0.217	0.0032	1266.2	17	1699.1	28	2255.3	49.1	25.4782	43.8567	43.8567	-	-	Wang et al. (2016)
KCP-8	0.31	0.1216	0.0037	4.863	0.1632	0.2881	0.0067	1632.1	33.6	1795.9	28.3	1979.9	54	9.12078	17.5665	17.5665	-	-	Wang et al. (2016)
KCP-9	0.4	0.1093	0.0028	3.1237	0.078	0.2049	0.0024	1201.6	12.9	1438.5	19.2	1788	47.7	16.4685	32.7964	32.7964	-	-	Wang et al. (2016)
KCP-10	0.46	0.1242	0.0031	5.4315	0.1351	0.3137	0.0039	1758.9	19	1889.8	21.3	2017.6	44.1	6.92666	12.8222	12.8222	-	-	Wang et al. (2016)
KCP-11	0.68	0.1044	0.0026	4.914	0.1305	0.3379	0.0053	1876.3	25.4	1804.7	22.4	1705.6	46.5	-3.96742	-10.0082	-10.0082	-	-	Wang et al. (2016)
KCP-12	0.63	0.139	0.0036	7.9015	0.2124	0.4079	0.0056	2205.3	25.6	2219.8	24.2	2214.5	44.4	0.653212	0.415444	0.415444	2214.5	44.4	Wang et al. (2016)
KCP-13	0.8	0.0539	0.0046	0.4393	0.0381	0.0592	0.0013	370.5	8	369.7	26.8	368.6	194.4	-0.216392	-0.515464	-0.216392	370.5	8	Wang et al. (2016)
KCP-14	0.56	0.1201	0.0035	3.9456	0.1175	0.236	0.0035	1365.7	18.2	1623.1	24.1	1958.3	51.7	15.8585	30.2609	30.2609	-	-	Wang et al. (2016)
KCP-15	1.13	0.1431	0.0037	3.071	0.0923	0.1539	0.0027	923	15.3	1425.5	23	2265.1	44.6	35.2508	59.2512	35.2508	-	-	Wang et al. (2016)
KCP-16	0.87	0.0542	0.0039	0.4412	0.0311	0.059	0.0011	369.3	6.8	371.1	21.9	388.9	161.1	0.485044	5.03986	0.485044	369.3	6.8	Wang et al. (2016)
KCP-17-1	0.42	0.0552	0.0024	0.6259	0.0269	0.0821	0.0013	508.9	7.5	493.6	16.8	420.4	102.8	-3.09968	-21.0514	-3.09968	508.9	7.5	Wang et al. (2016)
KCP-17-2	1.7	0.0772	0.0019	1.8622	0.0502	0.1743	0.0032	1035.7	17.5	1067.8	17.8	1127.8	50	3.00618	8.16634	8.16634	1127.8	50	Wang et al. (2016)
KCP-18	0.53	0.0566	0.003	0.5956	0.0309	0.0767	0.0013	476.6	8	474.4	19.7	476	120.4	-0.463744	-0.12605	-0.463744	476.6	8	Wang et al. (2016)
KCP-19	0.47	0.1378	0.0049	5.5069	0.1898	0.2898	0.0049	1640.6	24.3	1901.7	29.6	2211.1	62.3	13.7298	25.8016	25.8016	-	-	Wang et al. (2016)
KCP-20	0.6	0.1172	0.0036	5.2241	0.157	0.3222	0.0048	1800.4	23.6	1856.6	25.6	1913.9	55.6	3.02704	5.9303	5.9303	1913.9	55.6	Wang et al. (2016)
KCP-21	0.85	0.0808	0.0051	0.8291	0.049	0.0746	0.0013	463.9	7.6	613.1	27.2	1217.6	125.5	24.3353	61.9005	24.3353	-	-	Wang et al. (2016)
KCP-22	0.66	0.1346	0.0032	4.0395	0.1017	0.2159	0.0032	1260	16.8	1642.2	20.5	2159	47.4	23.2737	41.6396	41.6396	-	-	Wang et al. (2016)
KCP-23	2.27	0.1214	0.0052	6.3061	0.2699	0.3773	0.0082	2063.7	38.2	2019.3	37.5	1976.2	75.9	-2.19878	-4.42769	-4.42769	1976.2	75.9	Wang et al. (2016)
Site 13: Yangquan
Sample	Th/U	207Pb/206Pb	Error	207Pb/235U	Error	206Pb/238U	Error	238U-206Pb date	Error	235U-207Pb date	Error	207Pb-206Pb date	Error	Discordance 1 (238U–206Pb vs 235U–207Pb)	Discordance 2 (238U–206Pb vs 207Pb–206Pb)	Discordance	Preferred Age	Error	Data source
Name			1σ		1σ		1σ	(Ma)	1σ	(Ma)	1σ	(Ma)	1σ	(%)	(%)	(%)	(Ma)	1σ
1.1	0.66	0.0579	0.0013	0.5209	0.0072	0.0653	0.0006	408	4	426	5	526	50	4.22535	22.4335	4.22535	408	4	Liu et al. (2014)
2.1	0.84	0.0515	0.0012	0.3425	0.0053	0.0483	0.0004	304	3	299	4	262	54	-1.67224	-16.0305	-1.67224	304	3	Liu et al. (2014)
3.1	1.42	0.0722	0.0016	1.655	0.02	0.1663	0.0015	991	8	992	8	992	44	0.100806	0.100806	0.100806	991	8	Liu et al. (2014)
4.1	1.02	0.057	0.0014	0.5048	0.0082	0.0642	0.0006	401	4	415	6	491	54	3.37349	18.3299	3.37349	401	4	Liu et al. (2014)
5.1	0.72	0.0518	0.0012	0.3724	0.0053	0.0521	0.0005	328	3	321	4	278	52	-2.18069	-17.9856	-2.18069	328	3	Liu et al. (2014)
6.1	0.34	0.0572	0.0012	0.5441	0.0064	0.069	0.0006	430	4	441	4	499	48	2.49433	13.8277	2.49433	430	4	Liu et al. (2014)
7.1	1.14	0.1188	0.0024	2.443	0.0225	0.1491	0.0013	896	7	1255	7	1939	36	28.6056	53.7906	28.6056	-	-	Liu et al. (2014)
8.1	0.34	0.054	0.0012	0.5092	0.0059	0.0684	0.0006	426	4	418	4	372	48	-1.91388	-14.5161	-1.91388	426	4	Liu et al. (2014)
9.1	0.21	0.0715	0.0015	1.584	0.016	0.1608	0.0014	961	8	964	6	971	42	0.311203	1.02987	0.311203	961	8	Liu et al. (2014)
10.1	0.67	0.056	0.0013	0.5482	0.008	0.0711	0.0007	443	4	444	5	450	51	0.225225	1.55556	0.225225	443	4	Liu et al. (2014)
11.1	0.41	0.0573	0.0013	0.5577	0.007	0.0706	0.0006	440	4	450	5	502	49	2.22222	12.3506	2.22222	440	4	Liu et al. (2014)
12.1	0.77	0.0572	0.0014	0.6069	0.009	0.077	0.0007	478	4	482	6	499	52	0.829876	4.20842	0.829876	478	4	Liu et al. (2014)
13.1	0.74	0.0535	0.0012	0.396	0.0048	0.0538	0.0005	338	3	339	3	348	49	0.294985	2.87356	0.294985	338	3	Liu et al. (2014)
14.1	1.54	0.0556	0.0013	0.5088	0.007	0.0665	0.0006	415	4	418	5	434	50	0.717703	4.37788	0.717703	415	4	Liu et al. (2014)
15.1	0.78	0.1449	0.003	7.3447	0.0677	0.3676	0.0032	2018	15	2154	8	2287	35	6.31383	11.7621	11.7621	-	-	Liu et al. (2014)
16.1	1.42	0.0559	0.0012	0.486	0.0051	0.063	0.0006	394	3	402	3	449	46	1.99005	12.2494	1.99005	394	3	Liu et al. (2014)
17.1	0.71	0.0569	0.0013	0.3683	0.005	0.047	0.0004	296	3	318	4	488	50	6.91824	39.3443	6.91824	296	3	Liu et al. (2014)
18.1	0.66	0.0567	0.0014	0.5579	0.0093	0.0714	0.0007	444	4	450	6	479	54	1.33333	7.30689	1.33333	444	4	Liu et al. (2014)
19.1	1.64	0.0532	0.0013	0.348	0.006	0.0474	0.0004	299	3	303	5	339	56	1.32013	11.7994	1.32013	299	3	Liu et al. (2014)
20.1	0.66	0.0571	0.0017	0.513	0.0116	0.0652	0.0007	407	4	421	8	495	64	3.32542	17.7778	3.32542	407	4	Liu et al. (2014)
21.1	0.52	0.0562	0.0012	0.5501	0.0056	0.071	0.0006	442	4	445	4	459	46	0.674157	3.7037	0.674157	442	4	Liu et al. (2014)
22.1	0.76	0.0994	0.005	0.6866	0.0391	0.0489	0.0007	308	4	531	24	1614	94	41.9962	80.917	41.9962	-	-	Liu et al. (2014)
23.1	0.3	0.0562	0.0013	0.5284	0.0135	0.0687	0.0008	429	5	431	9	457	52	0.464037	6.12691	0.464037	429	5	Liu et al. (2014)
24.1	0.79	0.0593	0.0016	0.516	0.0155	0.063	0.0008	394	5	422	10	589	57	6.63507	33.107	6.63507	394	5	Liu et al. (2014)
25.1	0.98	0.0573	0.0018	0.5569	0.0205	0.0699	0.0011	435	7	450	13	506	70	3.33333	14.0316	3.33333	435	7	Liu et al. (2014)
26.1	0.24	0.1601	0.0037	4.7286	0.1389	0.2156	0.0055	1259	29	1772	25	2457	39	28.9503	48.7586	48.7586	-	-	Liu et al. (2014)
TH-68-01	1.04213	0.053	0.002	0.358	0.015	0.049	0.001	308.423	3.262	310.724	11.147	329.347	12.4282	0.740529	6.35318	0.740529	308.423	3.262	Wang et al. (2010)
TH-68-02	0.273231	0.057	0.001	0.508	0.016	0.065	0.001	405.966	4.558	417.01	10.961	474.25	8.32018	2.64838	14.3983	2.64838	405.966	4.558	Wang et al. (2010)
TH-68-03	0.397922	0.06	0.002	0.587	0.023	0.071	0.001	440.535	5.463	469.082	15.006	611.903	20.3968	6.08572	28.0057	6.08572	440.535	5.463	Wang et al. (2010)
TH-68-04	0.40876	0.16	0.002	6.582	0.196	0.298	0.004	1681.41	22.043	2056.93	26.263	2455.85	30.6981	18.2566	31.5345	31.5345	-	-	Wang et al. (2010)
TH-68-05	1.05191	0.099	0.001	3.722	0.115	0.273	0.003	1554.44	13.373	1576.04	24.641	1602.48	16.1867	1.37052	2.99779	2.99779	1602.48	16.1867	Wang et al. (2010)
TH-68-06	0.775228	0.054	0.002	0.365	0.017	0.049	0.001	310.679	3.839	315.871	12.755	382.884	14.1809	1.64371	18.8582	1.64371	310.679	3.839	Wang et al. (2010)
TH-68-07	0.791798	0.056	0.002	0.545	0.022	0.07	0.001	438.398	3.93	441.739	14.214	456.453	16.3019	0.756329	3.9555	0.756329	438.398	3.93	Wang et al. (2010)
TH-68-08	0.439988	0.057	0.002	0.545	0.021	0.07	0.001	434.532	5.278	441.83	14.091	484.833	17.0117	1.65177	10.3749	1.65177	434.532	5.278	Wang et al. (2010)
TH-68-09	1.24161	0.057	0.003	0.592	0.026	0.076	0.002	473.64	11.248	472.357	16.736	488.898	25.7315	-0.271617	3.1209	-0.271617	473.64	11.248	Wang et al. (2010)
TH-68-10	0.58291	0.056	0.002	0.543	0.025	0.07	0.001	437.77	5.43	440.618	16.254	463.63	16.5582	0.646365	5.57772	0.646365	437.77	5.43	Wang et al. (2010)
TH-68-11	0.154979	0.059	0.002	0.576	0.023	0.07	0.002	438.357	9.697	461.791	14.981	583.816	19.7904	5.07459	24.9152	5.07459	438.357	9.697	Wang et al. (2010)
TH-68-12	0.480175	0.06	0.002	0.583	0.025	0.07	0.001	435.114	7.941	466.678	16.263	617.689	20.5896	6.76355	29.5578	6.76355	435.114	7.941	Wang et al. (2010)
TH-68-13	1.28832	0.158	0.002	10.184	0.259	0.468	0.006	2475.24	26.57	2451.67	23.501	2435.46	30.8286	-0.961222	-1.63329	-1.63329	2435.46	30.8286	Wang et al. (2010)
TH-68-14	0.621891	0.056	0.004	0.575	0.044	0.075	0.002	466.829	10.845	461.517	28.185	470.185	33.5846	-1.15099	0.713762	-1.15099	466.829	10.845	Wang et al. (2010)
TH-68-15	0.758548	0.058	0.003	0.585	0.029	0.075	0.001	464.781	6.584	467.501	18.405	514.056	26.5891	0.581817	9.58553	0.581817	464.781	6.584	Wang et al. (2010)
TH-68-16	0.449455	0.056	0.002	0.536	0.02	0.071	0.001	439.309	4.899	435.548	13.422	433.126	15.4688	-0.86351	-1.42753	-0.86351	439.309	4.899	Wang et al. (2010)
TH-68-17	0.712336	0.054	0.003	0.424	0.026	0.057	0.001	359.813	7.771	358.845	18.831	379.003	21.0557	-0.269754	5.06328	-0.269754	359.813	7.771	Wang et al. (2010)
TH-68-18	0.745258	0.057	0.002	0.565	0.021	0.073	0.001	453.238	5.989	454.889	13.343	472.053	16.5633	0.362946	3.98578	0.362946	453.238	5.989	Wang et al. (2010)
TH-68-19	0.614679	0.079	0.006	0.698	0.046	0.07	0.003	436.911	15.093	537.724	27.722	1178.43	89.5007	18.7481	62.9242	18.7481	-	-	Wang et al. (2010)
TH-68-20	0.447903	0.056	0.003	0.536	0.041	0.069	0.002	431.025	10.956	435.846	27.324	449.569	24.0841	1.10612	4.12484	1.10612	431.025	10.956	Wang et al. (2010)
TH-68-21	2.0166	0.157	0.004	10.706	0.405	0.495	0.007	2593.13	30.229	2497.9	35.117	2422.67	61.724	-3.81228	-7.03613	-7.03613	2422.67	61.724	Wang et al. (2010)
TH-68-22	0.494237	0.072	0.012	0.438	0.043	0.051	0.002	318.495	14.042	368.998	30.663	985.972	164.329	13.6865	67.6974	13.6865	-	-	Wang et al. (2010)
TH-68-23	0.718492	0.057	0.002	0.592	0.029	0.076	0.001	472.086	7.132	472.129	18.739	477.876	16.7676	0.00910768	1.21161	0.00910768	472.086	7.132	Wang et al. (2010)
TH-68-24	0.383502	0.063	0.006	0.583	0.049	0.069	0.002	432.267	14.846	466.273	31.251	707.169	67.3494	7.29315	38.8736	7.29315	432.267	14.846	Wang et al. (2010)
TH-68-25	0.276333	0.056	0.004	0.579	0.039	0.077	0.003	480.787	15	464.029	25.035	468.061	33.4329	-3.61141	-2.71888	-3.61141	480.787	15	Wang et al. (2010)
TH-68-26	0.511508	0.133	0.012	0.772	0.072	0.047	0.002	298.901	11.49	581.106	41.247	2137.5	192.857	48.5634	86.0163	48.5634	-	-	Wang et al. (2010)
TH-68-27	0.479447	0.057	0.001	0.562	0.017	0.071	0.001	444.139	4.651	452.793	11.234	496.991	8.71914	1.91125	10.6344	1.91125	444.139	4.651	Wang et al. (2010)
TH-68-28	0.498572	0.052	0.003	0.349	0.022	0.049	0.001	306.743	4.992	303.673	16.903	307.155	17.7205	-1.01096	0.134134	-1.01096	306.743	4.992	Wang et al. (2010)
TH-68-29	0.290743	0.059	0.001	0.572	0.02	0.07	0.001	437.003	4.297	459.074	12.815	566.055	9.59415	4.80772	22.7985	4.80772	437.003	4.297	Wang et al. (2010)
TH-68-30	0.461622	0.056	0.001	0.54	0.019	0.07	0.001	434.495	5.518	438.231	12.453	449.569	8.02802	0.852518	3.35299	0.852518	434.495	5.518	Wang et al. (2010)
TH-68-31	0.547423	0.057	0.002	0.559	0.022	0.071	0.001	444.126	4.989	450.95	14.407	479.67	16.8305	1.51325	7.41009	1.51325	444.126	4.989	Wang et al. (2010)
TH-68-32	0.849052	0.059	0.002	0.431	0.019	0.053	0.001	335.006	5.541	363.69	13.63	579.861	19.6563	7.88694	42.2265	7.88694	335.006	5.541	Wang et al. (2010)
TH-68-33	0.925413	0.069	0.002	0.699	0.028	0.074	0.001	462.157	6.237	538.3	16.456	898.122	26.0325	14.1451	48.5418	14.1451	-	-	Wang et al. (2010)
TH-68-34	0.420079	0.057	0.002	0.548	0.019	0.07	0.001	433.222	5.58	443.553	12.234	495.123	17.3727	2.32915	12.5021	2.32915	433.222	5.58	Wang et al. (2010)
TH-68-35	0.213513	0.057	0.001	0.581	0.016	0.074	0.001	457.931	4.955	464.954	10.13	504.937	8.85854	1.51047	9.30928	1.51047	457.931	4.955	Wang et al. (2010)
TH-68-36	0.200413	0.058	0.001	0.552	0.01	0.069	0.001	431.127	3.569	446.194	6.33	520.41	8.97259	3.37678	17.1563	3.37678	431.127	3.569	Wang et al. (2010)
TH-68-37	0.647219	0.164	0.003	11.346	0.2	0.502	0.005	2621.94	21.664	2551.99	16.458	2499.07	45.7148	-2.74108	-4.91638	-4.91638	2499.07	45.7148	Wang et al. (2010)
TH-68-38	0.549908	0.057	0.001	0.55	0.01	0.07	0.001	433.916	3.49	445.133	6.402	501.89	8.80509	2.51992	13.5436	2.51992	433.916	3.49	Wang et al. (2010)
TH-68-39	0.625546	0.057	0.001	0.574	0.015	0.073	0.001	453.152	3.996	460.734	9.515	501.89	8.80509	1.64564	9.71089	1.64564	453.152	3.996	Wang et al. (2010)
TH-68-40	1.02932	0.055	0.002	0.57	0.017	0.075	0.001	467.17	4.475	458.198	11.093	413.01	15.0185	-1.95811	-13.1135	-1.95811	467.17	4.475	Wang et al. (2010)
TH-68-41	0.848225	0.145	0.011	1.184	0.097	0.057	0.001	356.931	5.281	793.357	45.072	2291.66	173.85	55.01	84.4248	55.01	-	-	Wang et al. (2010)
TH-68-42	0.547879	0.056	0.001	0.552	0.014	0.071	0.001	443.305	4.46	446.141	8.955	464.86	8.30107	0.635673	4.63688	0.635673	443.305	4.46	Wang et al. (2010)
TH-68-43	0.634679	0.056	0.001	0.565	0.012	0.073	0.001	451.319	4.35	455.067	7.985	477.82	8.5325	0.823615	5.54623	0.823615	451.319	4.35	Wang et al. (2010)
TH-68-44	0.582091	0.077	0.002	0.791	0.02	0.076	0.001	474.458	6.21	591.975	11.6	1125	29.2208	19.8517	57.826	19.8517	-	-	Wang et al. (2010)
TH-68-45	1.26962	0.053	0.002	0.377	0.013	0.052	0.001	329.278	4.052	324.669	9.951	309.32	11.6725	-1.4196	-6.45222	-1.4196	329.278	4.052	Wang et al. (2010)
TH-68-46	1.20457	0.149	0.002	3.227	0.052	0.154	0.002	924.623	8.841	1463.76	12.477	2338.59	31.3905	36.8323	60.4624	36.8323	-	-	Wang et al. (2010)
TH-68-47	0.467291	0.066	0.001	0.978	0.024	0.104	0.002	637.48	10.187	692.554	12.335	794.445	12.037	7.9523	19.7578	7.9523	637.48	10.187	Wang et al. (2010)
TH-68-48	0.478128	0.058	0.001	0.584	0.011	0.07	0.001	435.3	3.87	466.869	6.773	527.815	9.10026	6.76185	17.5279	6.76185	435.3	3.87	Wang et al. (2010)
TH-68-49	0.275368	0.137	0.001	4.934	0.072	0.244	0.003	1407.05	13.11	1808.15	12.311	2194.45	16.0178	22.1828	35.8811	35.8811	-	-	Wang et al. (2010)
TH-68-50	0.417797	0.054	0.001	0.525	0.008	0.066	0	408.992	2.992	428.776	5.247	364.87	6.75685	4.61406	-12.0925	4.61406	408.992	2.992	Wang et al. (2010)
TH-68-51	0.355357	0.058	0.001	0.561	0.012	0.064	0.001	398.975	3.163	452.297	7.863	538.925	9.29181	11.7892	25.9684	11.7892	-	-	Wang et al. (2010)
TH-68-52	0.769645	0.058	0.001	0.565	0.013	0.066	0.001	409.624	3.377	454.727	8.517	527.815	9.10026	9.9187	22.3925	9.9187	409.624	3.377	Wang et al. (2010)
TH-68-53	0.462857	0.057	0.001	0.547	0.013	0.066	0.001	413.165	3.395	442.888	8.796	479.67	8.41526	6.71118	13.8647	6.71118	413.165	3.395	Wang et al. (2010)
TH-68-54	0.567929	0.058	0.001	0.602	0.015	0.072	0.001	449.995	5.519	478.538	9.555	600.025	10.3453	5.96463	25.004	5.96463	449.995	5.519	Wang et al. (2010)
TH-68-55	0.661428	0.055	0.002	0.556	0.02	0.072	0.001	450.431	5.891	448.99	12.985	405.605	14.7493	-0.320943	-11.0516	-0.320943	450.431	5.891	Wang et al. (2010)
TH-68-56	0.645712	0.056	0.001	0.572	0.013	0.074	0.001	457.292	3.866	459.114	8.136	461.155	8.23491	0.396851	0.837679	0.396851	457.292	3.866	Wang et al. (2010)
TH-68-57	0.497746	0.058	0.001	0.574	0.014	0.072	0.001	446.785	3.843	460.703	9.074	516.705	8.90871	3.02104	13.5319	3.02104	446.785	3.843	Wang et al. (2010)
TH-68-58	0.532405	0.054	0.001	0.536	0.01	0.072	0.001	445.919	3.573	435.506	6.692	388.94	7.20259	-2.39101	-14.6498	-2.39101	445.919	3.573	Wang et al. (2010)
TH-68-59	0.717314	0.076	0.002	0.578	0.017	0.056	0.001	348.585	3.287	463.322	11.001	1100	28.9474	24.764	68.3105	24.764	-	-	Wang et al. (2010)
TH-68-60	0.575972	0.073	0.001	0.728	0.013	0.073	0.001	451.654	4.226	555.238	7.797	1012.96	13.8762	18.6558	55.4125	18.6558	-	-	Wang et al. (2010)
TH-68-61	0.725667	0.078	0.003	0.604	0.022	0.057	0.001	354.916	4.233	480.019	14.109	1142.6	43.9462	26.0621	68.9379	26.0621	-	-	Wang et al. (2010)
TH-68-62	0.240017	0.054	0.001	0.561	0.012	0.075	0.001	466.984	4.169	452.015	7.978	372.275	6.89398	-3.31162	-25.4406	-3.31162	466.984	4.169	Wang et al. (2010)
TH-68-63	0.469814	0.056	0.001	0.567	0.01	0.073	0.001	454.738	4.12	456.097	6.191	461.155	8.23491	0.297963	1.39151	0.297963	454.738	4.12	Wang et al. (2010)
TH-68-64	0.525311	0.059	0.001	0.405	0.01	0.05	0	313.632	2.861	345.23	7.105	564.85	9.57373	9.15274	44.4752	9.15274	313.632	2.861	Wang et al. (2010)
TH-68-65	1.09231	0.055	0.001	0.386	0.009	0.051	0	318.751	2.88	331.13	6.839	416.715	7.57664	3.73841	23.5086	3.73841	318.751	2.88	Wang et al. (2010)
TH-68-66	0.415083	0.058	0.001	0.57	0.011	0.072	0.001	445.962	3.862	457.723	6.863	522.26	9.00448	2.56946	14.6092	2.56946	445.962	3.862	Wang et al. (2010)
TH-68-67	0.493486	0.058	0.001	0.553	0.01	0.069	0.001	431.051	4.159	447.126	6.829	527.815	9.10026	3.59518	18.3329	3.59518	431.051	4.159	Wang et al. (2010)
TH-68-68	0.862819	0.065	0.002	0.55	0.013	0.062	0.001	386.462	6.332	444.802	8.814	783.335	24.1026	13.1159	50.6645	13.1159	-	-	Wang et al. (2010)
TH-68-69	0.274132	0.057	0.001	0.513	0.009	0.065	0.001	406.421	3.585	420.505	6.154	500.04	8.77263	3.34931	18.7223	3.34931	406.421	3.585	Wang et al. (2010)
TH-68-70	0.49858	0.059	0.001	0.55	0.01	0.068	0.001	422.265	4.742	445.11	6.819	568.55	9.63644	5.13244	25.7295	5.13244	422.265	4.742	Wang et al. (2010)
TH-68-71	0.757682	0.164	0.009	2.073	0.165	0.077	0.002	479.783	12.478	1139.78	54.684	2502.16	137.314	57.9058	80.8252	57.9058	-	-	Wang et al. (2010)
TH-68-72	0.738923	0.058	0.001	0.565	0.01	0.071	0.001	439.589	3.633	454.748	6.441	531.52	9.16414	3.33349	17.2959	3.33349	439.589	3.633	Wang et al. (2010)
TH-68-73	0.858356	0.061	0.001	0.561	0.008	0.067	0.001	416.313	3.731	451.896	5.448	631.5	10.3525	7.87416	34.0755	7.87416	416.313	3.731	Wang et al. (2010)
TH-68-74	0.440877	0.055	0.001	0.543	0.01	0.072	0.001	447.86	3.621	440.316	6.818	398.2	7.24	-1.71331	-12.4711	-1.71331	447.86	3.621	Wang et al. (2010)
TH-68-75	0.487987	0.059	0.001	0.579	0.011	0.071	0.001	441.704	4.366	463.725	7.333	568.55	9.63644	4.74872	22.3104	4.74872	441.704	4.366	Wang et al. (2010)
TH-69-01	0.307224	0.173	0.003	12.852	0.357	0.539	0.007	2780.86	29.942	2668.86	26.167	2582.24	44.7787	-4.19647	-7.69182	-7.69182	2582.24	44.7787	Wang et al. (2010)
TH-69-02	0.808071	0.061	0.002	0.519	0.022	0.062	0.001	385.758	5.101	424.362	14.94	646.362	21.1922	9.09695	40.3186	9.09695	385.758	5.101	Wang et al. (2010)
TH-69-03	1.50373	0.098	0.002	3.633	0.1	0.267	0.003	1525.5	14.271	1556.71	21.95	1590.29	32.4548	2.00506	4.07386	4.07386	1590.29	32.4548	Wang et al. (2010)
TH-69-04	0.55786	0.141	0.002	8.238	0.219	0.423	0.005	2275.22	24.122	2257.55	24.085	2236.45	31.7227	-0.782662	-1.73369	-1.73369	2236.45	31.7227	Wang et al. (2010)
TH-69-05	0.996879	0.191	0.009	1.173	0.068	0.044	0.001	278.106	5.04	788.156	31.819	2754.19	129.779	64.7143	89.9024	64.7143	-	-	Wang et al. (2010)
TH-69-06	1.38516	0.06	0.005	0.412	0.036	0.05	0.001	315.733	6.434	350.304	25.591	605.129	50.4274	9.86886	47.8239	9.86886	315.733	6.434	Wang et al. (2010)
TH-69-07	0.72769	0.062	0.004	0.436	0.029	0.051	0.001	320.933	4.697	367.099	20.355	670.861	43.2814	12.5759	52.161	12.5759	-	-	Wang et al. (2010)
TH-69-08	0.434757	0.06	0.003	0.604	0.034	0.073	0.001	452.76	5.968	479.706	21.304	615.455	30.7728	5.61719	26.4349	5.61719	452.76	5.968	Wang et al. (2010)
TH-69-09	0.639424	0.054	0.002	0.548	0.024	0.073	0.001	455.865	5.522	443.54	15.495	361.645	13.3943	-2.77878	-26.0532	-2.77878	455.865	5.522	Wang et al. (2010)
TH-69-10	0.398105	0.16	0.005	9.979	0.437	0.449	0.007	2392.44	30.354	2432.86	40.429	2450.73	76.5853	1.6617	2.37852	2.37852	2450.73	76.5853	Wang et al. (2010)
TH-69-11	0.977945	0.069	0.003	0.482	0.023	0.05	0.001	315.848	3.64	399.206	15.891	904.274	39.3163	20.8809	65.0716	20.8809	-	-	Wang et al. (2010)
TH-69-12	0.288292	0.062	0.001	0.335	0.012	0.039	0.001	246.091	3.692	293.384	9.023	668.865	10.7881	16.1198	63.2077	16.1198	-	-	Wang et al. (2010)
TH-69-13	0.826948	0.06	0.002	0.578	0.023	0.07	0.001	433.441	4.707	463.154	14.875	610.695	20.3565	6.41536	29.025	6.41536	433.441	4.707	Wang et al. (2010)
TH-69-14	0.00439312	0.112	0.002	5.336	0.166	0.341	0.004	1891.51	17.469	1874.59	26.625	1839.04	32.8401	-0.902329	-2.85284	-2.85284	1839.04	32.8401	Wang et al. (2010)
TH-69-15	0.762807	0.063	0.002	0.612	0.025	0.07	0.001	437.423	4.214	484.756	15.487	703.891	22.3457	9.76429	37.8564	9.76429	437.423	4.214	Wang et al. (2010)
TH-69-16	0.223943	0.166	0.003	7.265	0.281	0.315	0.004	1764.71	20.608	2144.57	34.577	2518.84	45.5213	17.713	29.9399	29.9399	-	-	Wang et al. (2010)
TH-69-17	0.100512	0.118	0.001	5.765	0.17	0.353	0.003	1946.91	15.187	1941.16	25.577	1919.39	16.266	-0.295905	-1.4339	-1.4339	1919.39	16.266	Wang et al. (2010)
TH-69-18	0.121639	0.156	0.003	4.114	0.135	0.191	0.003	1125.99	15.886	1657.08	26.716	2408.15	46.3105	32.05	53.2427	53.2427	-	-	Wang et al. (2010)
TH-69-19	1.42019	0.059	0.003	0.447	0.023	0.055	0.001	347.974	4.351	375.514	15.926	548.881	27.9092	7.33395	36.603	7.33395	347.974	4.351	Wang et al. (2010)
TH-69-20	0.581546	0.163	0.003	9.541	0.316	0.421	0.006	2266.97	25.464	2391.51	30.403	2486.57	45.7651	5.20734	8.8314	8.8314	2486.57	45.7651	Wang et al. (2010)
TH-69-21	0.697517	0.068	0.002	1.357	0.058	0.144	0.002	865.308	10.374	870.604	24.788	868.789	25.5526	0.608313	0.400673	0.608313	865.308	10.374	Wang et al. (2010)
TH-69-22	0.598413	0.061	0.003	0.612	0.032	0.073	0.001	456.869	6.308	485.054	20.078	637.866	31.3705	5.81069	28.3754	5.81069	456.869	6.308	Wang et al. (2010)
TH-69-23	0.428563	0.063	0.001	0.918	0.027	0.105	0.001	642.367	5.75	661.39	14.182	713.193	11.3205	2.87622	9.93083	2.87622	642.367	5.75	Wang et al. (2010)
TH-69-24	0.816042	0.073	0.009	0.438	0.047	0.047	0.002	294.703	10.494	368.746	33.29	1014.02	125.017	20.0797	70.9372	20.0797	-	-	Wang et al. (2010)
TH-69-25	0.416517	0.056	0.002	0.57	0.026	0.073	0.001	455.87	5.293	458.134	16.856	467.842	16.7086	0.494179	2.55898	0.494179	455.87	5.293	Wang et al. (2010)
TH-69-26	0.687318	0.059	0.002	0.411	0.014	0.05	0.001	314.605	3.856	349.515	10.13	581.692	19.7184	9.98813	45.9155	9.98813	314.605	3.856	Wang et al. (2010)
TH-69-27	0.953144	0.059	0.003	0.556	0.03	0.068	0.001	426.761	6.71	448.899	19.9	575.833	29.2796	4.93162	25.8881	4.93162	426.761	6.71	Wang et al. (2010)
TH-69-28	0.0510782	0.122	0.001	3.909	0.089	0.231	0.002	1339.89	10.628	1615.48	18.506	1981.75	16.2439	17.0592	32.3883	32.3883	-	-	Wang et al. (2010)
TH-69-29	0.573192	0.073	0.006	0.51	0.043	0.051	0.001	320.521	8.434	418.671	28.82	1012.41	83.2119	23.4432	68.3408	23.4432	-	-	Wang et al. (2010)
TH-69-30	0.517663	0.108	0.006	1.108	0.075	0.073	0.001	455.149	7.085	757.02	36.284	1762.91	97.9395	39.8762	74.182	39.8762	-	-	Wang et al. (2010)
TH-69-31	0.622456	0.05	0.003	0.337	0.02	0.048	0.001	305.28	4.881	294.736	15.144	195.758	11.7455	-3.57744	-55.9476	-3.57744	305.28	4.881	Wang et al. (2010)
TH-69-32	0.865741	0.057	0.002	0.73	0.025	0.092	0.001	568.402	5.873	556.718	14.931	495.819	17.3972	-2.09873	-14.639	-2.09873	568.402	5.873	Wang et al. (2010)
TH-69-33	0.358255	0.165	0.005	8.457	0.328	0.368	0.007	2020.71	30.822	2281.29	35.2	2510.29	76.0695	11.4225	19.5031	19.5031	-	-	Wang et al. (2010)
TH-69-34	0.675678	0.169	0.003	11.379	0.347	0.483	0.006	2542.44	24.084	2554.68	28.503	2545.83	45.1923	0.479003	0.133237	0.133237	2545.83	45.1923	Wang et al. (2010)
TH-69-35	0.895786	0.054	0.005	0.357	0.031	0.048	0.001	304.163	6.559	309.723	23.424	375.597	34.7775	1.79515	19.0188	1.79515	304.163	6.559	Wang et al. (2010)
TH-69-36	0.516238	0.05	0.003	0.261	0.019	0.037	0.001	235.015	5.084	235.601	15.003	214.617	12.877	0.248726	-9.50437	0.248726	-	-	Wang et al. (2010)
TH-69-37	0.508056	0.111	0.002	5.437	0.164	0.35	0.003	1936.42	15.696	1890.72	25.887	1820	32.7928	-2.41733	-6.39686	-6.39686	1820	32.7928	Wang et al. (2010)
TH-69-38	0.472445	0.057	0.002	0.56	0.022	0.071	0.001	443.977	4.475	451.641	14.125	472.273	16.571	1.69692	5.99145	1.69692	443.977	4.475	Wang et al. (2010)
TH-69-39	0.22653	0.051	0.001	0.49	0.016	0.069	0.001	431.336	4.576	404.592	11.087	243.474	4.774	-6.61012	-77.159	-6.61012	431.336	4.576	Wang et al. (2010)
TH-69-40	0.595509	0.058	0.002	0.411	0.015	0.051	0.001	320.688	3.267	349.929	11.093	535.698	18.4723	8.35627	40.1364	8.35627	320.688	3.267	Wang et al. (2010)
TH-69-41	1.14839	0.123	0.009	0.851	0.065	0.05	0.001	314.995	7.715	625.068	35.59	1995.99	146.048	49.6063	84.2186	49.6063	-	-	Wang et al. (2010)
TH-69-42	0.644366	0.059	0.003	0.405	0.018	0.05	0.001	314.216	4.759	345.344	12.693	572.255	29.0977	9.01362	45.0916	9.01362	314.216	4.759	Wang et al. (2010)
TH-69-43	0.966484	0.062	0.004	0.411	0.023	0.048	0.001	301.157	4.174	349.331	16.873	687.05	44.3258	13.7904	56.1667	13.7904	-	-	Wang et al. (2010)
TH-69-44	0.543984	0.056	0.001	0.56	0.01	0.073	0.001	454.486	4.486	451.497	6.732	435.23	7.77196	-0.66202	-4.42433	-0.66202	454.486	4.486	Wang et al. (2010)
TH-69-45	0.674568	0.079	0.004	0.605	0.038	0.054	0.001	341.813	4.213	480.351	23.868	1161.12	58.7906	28.841	70.5617	28.841	-	-	Wang et al. (2010)
TH-69-46	0.825779	0.06	0.003	0.389	0.02	0.047	0.001	297.153	4.6	333.909	14.983	605.575	30.2788	11.0078	50.9304	11.0078	-	-	Wang et al. (2010)
TH-69-47	1.17455	0.056	0.002	0.391	0.014	0.05	0.001	315.46	4.572	334.949	10.524	464.86	16.6021	5.8185	32.1387	5.8185	315.46	4.572	Wang et al. (2010)
Site 14: Southern Yangquan
Sample	Th/U	207Pb/206Pb	Error	207Pb/235U	Error	206Pb/238U	Error	238U-206Pb date	Error	235U-207Pb date	Error	207Pb-206Pb date	Error	Discordance 1 (238U–206Pb vs 235U–207Pb)	Discordance 2 (238U–206Pb vs 207Pb–206Pb)	Discordance	Preferred Age	Error	Data source
Name			1σ		1σ		1σ	(Ma)	1σ	(Ma)	1σ	(Ma)	1σ	(%)	(%)	(%)	(Ma)	1σ
TH-70-02	0.633386	0.157	0.003	10.439	0.318	0.464	0.006	2457.66	24.91	2474.49	28.192	2427.08	46.3773	0.679939	-1.25999	-1.25999	2427.08	46.3773	Wang et al. (2010)
TH-70-03	0.879823	0.145	0.008	1.084	0.062	0.055	0.001	343.075	5.756	745.785	30.279	2290.68	126.382	53.9981	85.023	53.9981	-	-	Wang et al. (2010)
TH-70-04	1.15108	0.053	0.004	0.35	0.029	0.047	0.001	296.174	4.256	304.898	21.784	336.524	25.398	2.86128	11.9902	2.86128	296.174	4.256	Wang et al. (2010)
TH-70-05	0.673703	0.056	0.006	0.402	0.046	0.052	0.001	325.075	8.902	343.389	33.213	471.064	50.4711	5.33331	30.9913	5.33331	325.075	8.902	Wang et al. (2010)
TH-70-06	0.734618	0.14	0.003	9.269	0.411	0.477	0.015	2515.8	64.471	2364.95	40.616	2229.46	47.7742	-6.37896	-12.8435	-12.8435	-	-	Wang et al. (2010)
TH-70-07	1.16925	0.152	0.002	8.111	0.238	0.385	0.004	2098.02	16.929	2243.52	26.514	2366.21	31.1343	6.48517	11.3341	11.3341	-	-	Wang et al. (2010)
TH-70-08	1.28982	0.146	0.002	9.125	0.268	0.451	0.005	2401.12	23.413	2350.58	26.917	2299.74	31.5034	-2.15007	-4.40801	-4.40801	2299.74	31.5034	Wang et al. (2010)
TH-70-09	0.558965	0.125	0.003	4.523	0.158	0.262	0.003	1497.64	15.598	1735.15	29.13	2027.95	48.6709	13.6884	26.1502	26.1502	-	-	Wang et al. (2010)
TH-70-10	0.0726258	0.12	0.001	4.992	0.174	0.301	0.004	1695.14	18.386	1817.95	29.572	1951.89	16.2657	6.75531	13.1537	13.1537	-	-	Wang et al. (2010)
TH-70-11	0.176626	0.113	0.002	3.23	0.118	0.206	0.002	1205.56	9.347	1464.43	28.401	1855.28	32.8369	17.677	35.02	35.02	-	-	Wang et al. (2010)
TH-70-12	2.54663	0.114	0.002	5.222	0.171	0.332	0.004	1847.63	21.74	1856.15	27.895	1861.69	32.6613	0.458908	0.755442	0.755442	1861.69	32.6613	Wang et al. (2010)
TH-70-14	0.884168	0.071	0.006	0.486	0.043	0.05	0.001	313.624	6.629	401.887	29.679	959.643	81.0966	21.9621	67.3187	21.9621	-	-	Wang et al. (2010)
TH-70-15	0.0860487	0.109	0.002	5.292	0.199	0.351	0.005	1938.1	24.375	1867.58	32.089	1784.48	32.7428	-3.77623	-8.60861	-8.60861	1784.48	32.7428	Wang et al. (2010)
TH-70-16	1.43225	0.063	0.005	0.445	0.045	0.05	0.001	315.058	7.532	374.096	31.348	696.751	55.2977	15.7815	54.7818	15.7815	-	-	Wang et al. (2010)
TH-70-17	1.12395	0.051	0.003	0.364	0.021	0.052	0.001	324.026	4.451	315.222	15.849	252.921	14.8777	-2.79295	-28.1135	-2.79295	324.026	4.451	Wang et al. (2010)
TH-70-18	0.760619	0.049	0.003	0.368	0.025	0.055	0.001	343.405	5.217	318.278	18.504	152.767	9.35308	-7.89467	-124.79	-7.89467	343.405	5.217	Wang et al. (2010)
TH-70-19	0.299339	0.155	0.002	9.956	0.342	0.46	0.009	2438.35	40.527	2430.69	31.738	2406.53	31.052	-0.31489	-1.32215	-1.32215	2406.53	31.052	Wang et al. (2010)
TH-70-20	1.1727	0.056	0.002	0.386	0.019	0.05	0.001	314.193	3.875	331.329	13.94	450.594	16.0926	5.1719	30.2714	5.1719	314.193	3.875	Wang et al. (2010)
TH-70-21	0.638804	0.155	0.002	9.728	0.297	0.453	0.006	2408.04	25.051	2409.39	28.07	2400.09	30.9689	0.0558649	-0.331112	-0.331112	2400.09	30.9689	Wang et al. (2010)
TH-70-22	0.945953	0.057	0.004	0.383	0.024	0.049	0.001	308.575	6.19	329.309	17.838	491.644	34.5013	6.29621	37.2361	6.29621	308.575	6.19	Wang et al. (2010)
TH-70-23	0.744651	0.1	0.009	0.703	0.061	0.052	0.003	325.042	15.405	540.843	36.467	1617.59	145.583	39.9009	79.9057	39.9009	-	-	Wang et al. (2010)
TH-70-24	0.183378	0.118	0.002	5.918	0.19	0.361	0.005	1986.9	22.433	1963.87	27.89	1933.43	32.77	-1.17243	-2.7654	-2.7654	1933.43	32.77	Wang et al. (2010)
TH-70-25	0.776329	0.117	0.003	5.758	0.213	0.359	0.006	1976.87	28.082	1940.15	32.032	1906.31	48.8798	-1.8929	-3.70139	-3.70139	1906.31	48.8798	Wang et al. (2010)
TH-70-26	0.910474	0.057	0.004	0.368	0.025	0.047	0.001	297.746	6.198	317.89	18.545	507.611	35.6218	6.33678	41.3437	6.33678	297.746	6.198	Wang et al. (2010)
TH-70-27	0.893583	0.075	0.005	0.586	0.046	0.057	0.001	358.418	8.929	468.301	29.412	1070.6	71.3733	23.4642	66.5218	23.4642	-	-	Wang et al. (2010)
TH-70-28	0.749369	0.071	0.006	0.451	0.042	0.047	0.001	293.886	7.728	378.106	29.248	951.531	80.4111	22.2742	69.1144	22.2742	-	-	Wang et al. (2010)
TH-70-29	0.217471	0.146	0.001	6.388	0.179	0.315	0.003	1767.27	16.277	2030.59	24.619	2300.8	15.7589	12.9678	23.1888	23.1888	-	-	Wang et al. (2010)
TH-70-30	0.951378	0.158	0.003	10.142	0.376	0.464	0.008	2457.38	36.043	2447.83	34.274	2438.15	46.294	-0.390059	-0.788754	-0.788754	2438.15	46.294	Wang et al. (2010)
TH-70-31	0.690204	0.069	0.006	0.463	0.038	0.05	0.001	311.799	6.433	386.582	26.181	902.406	78.4701	19.3447	65.448	19.3447	-	-	Wang et al. (2010)
TH-70-32	0.692187	0.086	0.008	0.577	0.052	0.05	0.002	311.746	10.23	462.59	33.761	1333.62	124.058	32.6086	76.6241	32.6086	-	-	Wang et al. (2010)
TH-70-33	0.826078	0.053	0.002	0.386	0.019	0.053	0.001	332.892	3.849	331.139	13.865	325.538	12.2845	-0.529385	-2.25903	-0.529385	332.892	3.849	Wang et al. (2010)
TH-70-34	1.1289	0.112	0.003	5.33	0.183	0.345	0.004	1912.96	18.056	1873.73	29.33	1824.41	48.8682	-2.09341	-4.85339	-4.85339	1824.41	48.8682	Wang et al. (2010)
TH-70-35	1.22779	0.113	0.003	5.206	0.195	0.332	0.004	1845.92	20.047	1853.55	31.987	1850.99	49.1413	0.411427	0.273853	0.273853	1850.99	49.1413	Wang et al. (2010)
TH-70-36	0.964905	0.057	0.003	0.371	0.023	0.048	0.001	301.068	5.359	320.229	16.87	479.377	25.2304	5.98353	37.196	5.98353	301.068	5.359	Wang et al. (2010)
TH-70-37	1.18743	0.071	0.002	0.489	0.02	0.05	0.001	312.004	3.961	404.211	13.385	970.995	27.352	22.8116	67.8676	22.8116	-	-	Wang et al. (2010)
TH-70-38	0.310952	0.123	0.002	6.314	0.196	0.369	0.005	2025.79	24.098	2020.39	27.285	2006.69	32.6291	-0.267225	-0.952066	-0.952066	2006.69	32.6291	Wang et al. (2010)
TH-70-39	0.826282	0.113	0.003	5.155	0.168	0.33	0.004	1837.53	18.991	1845.23	27.773	1846.92	49.0332	0.41713	0.508144	0.508144	1846.92	49.0332	Wang et al. (2010)
TH-70-40	1.34474	0.114	0.002	5.172	0.175	0.329	0.007	1832.17	32.676	1848.06	28.725	1864.15	32.7043	0.859658	1.71516	1.71516	1864.15	32.7043	Wang et al. (2010)
TH-70-41	0.443239	0.188	0.009	1.168	0.073	0.044	0.001	277.126	4.85	785.822	34.205	2727.78	130.585	64.7343	89.8406	64.7343	-	-	Wang et al. (2010)
TH-70-42	0.93015	0.069	0.004	0.446	0.026	0.047	0.001	297.494	5.351	374.576	18.14	898.15	52.0667	20.5785	66.877	20.5785	-	-	Wang et al. (2010)
TH-70-43	1.0008	0.078	0.005	0.502	0.029	0.049	0.001	311.012	6.68	413.034	19.69	1166.67	74.7865	24.7006	73.3419	24.7006	-	-	Wang et al. (2010)
TH-70-44	1.12069	0.057	0.003	0.404	0.019	0.051	0.001	321.109	4.07	344.547	13.599	500.04	26.3179	6.80256	35.7833	6.80256	321.109	4.07	Wang et al. (2010)
TH-70-45	0.826132	0.055	0.002	0.378	0.018	0.049	0.001	310.852	3.638	325.542	12.904	416.715	15.1533	4.51247	25.4042	4.51247	310.852	3.638	Wang et al. (2010)
TH-70-46	0.0387288	0.096	0.001	1.952	0.029	0.147	0.001	881.789	7.21	1099.01	10.033	1550.01	16.1459	19.7654	43.1106	19.7654	-	-	Wang et al. (2010)
TH-70-47	1.27878	0.129	0.01	1.107	0.103	0.057	0.001	358.458	7.332	756.894	49.602	2100	162.791	52.6409	82.9306	52.6409	-	-	Wang et al. (2010)
TH-70-48	0.945032	0.167	0.004	2.446	0.084	0.105	0.003	645.469	14.735	1256.32	24.711	2524.38	60.4642	48.6221	74.4306	48.6221	-	-	Wang et al. (2010)
TH-70-49	1.01728	0.134	0.008	1.037	0.069	0.054	0.001	337.07	5.083	722.415	34.473	2150.3	128.376	53.3412	84.3245	53.3412	-	-	Wang et al. (2010)
TH-70-51	1.03697	0.052	0.001	0.397	0.009	0.055	0.001	347.875	3.374	339.823	6.229	287.1	5.52115	-2.36947	-21.1686	-2.36947	347.875	3.374	Wang et al. (2010)
TH-70-52	1.28524	0.065	0.004	0.438	0.023	0.05	0.001	315.561	6.411	369.084	16.339	783.335	48.2052	14.5016	59.7157	14.5016	-	-	Wang et al. (2010)
TH-70-54	1.14124	0.246	0.014	2.16	0.16	0.056	0.001	354.236	8.934	1168.36	51.338	3158.34	179.743	69.6809	88.7841	69.6809	-	-	Wang et al. (2010)
TH-70-55	1.35818	0.174	0.014	1.599	0.168	0.057	0.001	358.104	7.933	969.749	65.863	2598.15	209.047	63.0725	86.217	63.0725	-	-	Wang et al. (2010)
TH-70-56	0.788363	0.092	0.005	0.628	0.033	0.05	0.001	312.001	6.206	494.812	20.497	1475.93	80.2136	36.9455	78.8607	36.9455	-	-	Wang et al. (2010)
Site 15: Wu'an, Handan
Sample	Th/U	207Pb/206Pb	Error	207Pb/235U	Error	206Pb/238U	Error	238U-206Pb date	Error	235U-207Pb date	Error	207Pb-206Pb date	Error	Discordance 1 (238U–206Pb vs 235U–207Pb)	Discordance 2 (238U–206Pb vs 207Pb–206Pb)	Discordance	Preferred Age	Error	Data source
Name			1σ		1σ		1σ	(Ma)	1σ	(Ma)	1σ	(Ma)	1σ	(%)	(%)	(%)	(Ma)	1σ
ZJS1-1	0.56	0.0731	0.0023	1.5575	0.0237	0.1545	0.0022	926.1	12.4	953.5	9.4	1016.8	63.3	2.87362	8.92014	2.87362	926.1	12.4	Wang et al. (2016)
ZJS1-2	0.79	0.0592	0.0019	0.4423	0.0071	0.0541	0.0008	339.9	4.9	371.9	5	575.9	69.1	8.60446	40.9793	8.60446	339.9	4.9	Wang et al. (2016)
ZJS1-3	0.47	0.153	0.0049	2.0846	0.0315	0.0988	0.0014	607.5	8.5	1143.7	10.4	2379.1	53.5	46.8829	74.4651	46.8829	-	-	Wang et al. (2016)
ZJS1-4	0.77	0.0972	0.0032	0.8773	0.0143	0.0655	0.001	408.8	6.2	639.5	7.7	1570.3	60.3	36.0751	73.9668	36.0751	-	-	Wang et al. (2016)
ZJS1-5	0.53	0.0784	0.0026	1.5678	0.027	0.145	0.0023	872.7	13.2	957.5	10.7	1157.6	64.3	8.8564	24.6113	8.8564	872.7	13.2	Wang et al. (2016)
ZJS1-6	0.11	0.0823	0.0026	1.8247	0.0272	0.1609	0.0023	961.6	12.7	1054.4	9.8	1251.5	60.9	8.80121	23.1642	8.80121	961.6	12.7	Wang et al. (2016)
ZJS1-7	1.22	0.094	0.003	2.7191	0.0419	0.2097	0.0031	1227.5	16.4	1333.7	11.4	1508.2	59.3	7.96281	18.6116	18.6116	-	-	Wang et al. (2016)
ZJS1-8	0.61	0.1118	0.0036	3.9014	0.0622	0.2531	0.0039	1454.6	19.9	1614	12.9	1828.3	57.3	9.87608	20.4398	20.4398	-	-	Wang et al. (2016)
ZJS1-9	0.56	0.0829	0.0026	1.0119	0.015	0.0886	0.0012	547	7.4	709.8	7.6	1265.8	60.7	22.936	56.7862	22.936	-	-	Wang et al. (2016)
ZJS2-1	0.29	0.1278	0.0042	7.2937	0.1426	0.4133	0.0066	2229.7	30.3	2148	17.5	2068	57.3	-3.80354	-7.81915	-7.81915	2068	57.3	Wang et al. (2016)
ZJS2-2	0.11	0.0686	0.0023	0.7452	0.0138	0.0786	0.0012	488	7.1	565.4	8	887.3	66.4	13.6894	45.0017	13.6894	-	-	Wang et al. (2016)
ZJS2-3	0.54	0.0525	0.0024	0.3916	0.0144	0.054	0.0009	338.9	5.5	335.5	10.5	309.1	101.6	-1.01341	-9.64089	-1.01341	338.9	5.5	Wang et al. (2016)
ZJS2-4	0.74	0.0578	0.0026	0.6108	0.0214	0.0765	0.0013	475.3	7.7	484.1	13.5	522.6	95.1	1.81781	9.0509	1.81781	475.3	7.7	Wang et al. (2016)
ZJS2-5	0.37	0.1224	0.0039	6.5277	0.1134	0.3863	0.0059	2105.7	27.5	2049.6	15.3	1991.2	55.9	-2.73712	-5.7503	-5.7503	1991.2	55.9	Wang et al. (2016)
ZJS2-6	1	0.0572	0.0026	0.5789	0.0208	0.0734	0.0012	456.5	7.4	463.8	13.3	496.6	97.3	1.57395	8.07491	1.57395	456.5	7.4	Wang et al. (2016)
ZJS2-7	0.24	0.1189	0.0038	5.9345	0.1007	0.3616	0.0055	1989.5	26	1966.3	14.7	1939.8	55.9	-1.17988	-2.56212	-2.56212	1939.8	55.9	Wang et al. (2016)
ZJS2-8	0.87	0.1186	0.0042	6.2843	0.1461	0.3838	0.0065	2094	30.5	2016.3	20.4	1935.6	62	-3.85359	-8.18351	-8.18351	1935.6	62	Wang et al. (2016)
ZJS2-9	0.54	0.0562	0.0024	0.6097	0.0194	0.0786	0.0013	487.7	7.7	483.4	12.2	459.8	91.3	-0.889532	-6.06786	-0.889532	487.7	7.7	Wang et al. (2016)
ZJS2-10	0.69	0.0762	0.0025	1.9557	0.0378	0.186	0.0028	1099.5	15.4	1100.4	13	1100.1	65.1	0.0817884	0.0545405	0.0545405	1100.1	65.1	Wang et al. (2016)
ZJS2-11	0.81	0.0547	0.0021	0.3941	0.0105	0.0522	0.0008	327.9	5	337.3	7.7	400.1	83.2	2.78684	18.0455	2.78684	327.9	5	Wang et al. (2016)
ZJS2-12	0.64	0.0532	0.0019	0.3707	0.0084	0.0505	0.0008	317.3	4.7	320.1	6.2	338.5	78	0.874727	6.26292	0.874727	317.3	4.7	Wang et al. (2016)
ZJS2-13	0.38	0.1603	0.005	9.5755	0.1543	0.4329	0.0065	2318.7	29.2	2394.8	14.8	2459.1	52.1	3.17772	5.70941	5.70941	2459.1	52.1	Wang et al. (2016)
ZJS2-14	0.66	0.0561	0.0028	0.6277	0.0257	0.0811	0.0014	502.4	8.4	494.7	16	457.1	106.4	-1.5565	-9.9103	-1.5565	502.4	8.4	Wang et al. (2016)
ZJS2-15	0.98	0.0563	0.0027	0.5915	0.0228	0.0761	0.0013	473	7.8	471.8	14.6	463.6	102.7	-0.254345	-2.02761	-0.254345	473	7.8	Wang et al. (2016)
ZJS2-16	0.76	0.0566	0.0025	0.586	0.0207	0.0751	0.0013	466.7	7.5	468.3	13.3	474.1	97	0.341661	1.56085	0.341661	466.7	7.5	Wang et al. (2016)
ZJS2-17	0.68	0.0715	0.0024	1.6335	0.034	0.1656	0.0025	987.9	14	983.2	13.1	971.7	68.1	-0.478031	-1.66718	-0.478031	987.9	14	Wang et al. (2016)
ZJS2-18	0.49	0.1195	0.0039	5.6942	0.1081	0.3454	0.0054	1912.7	25.9	1930.5	16.4	1948.8	57.6	0.922041	1.85242	1.85242	1948.8	57.6	Wang et al. (2016)
ZJS2-19	0.68	0.0501	0.0031	0.3661	0.0202	0.053	0.001	332.7	5.9	316.7	15	199.9	138	-5.0521	-66.4332	-5.0521	332.7	5.9	Wang et al. (2016)
ZJS2-20	0.61	0.1816	0.0059	12.8475	0.2422	0.513	0.0083	2669.6	35.5	2668.5	17.8	2667.2	53	-0.0412217	-0.089982	-0.089982	2667.2	53	Wang et al. (2016)
ZJS2-21	0.71	0.0635	0.0026	0.6613	0.0199	0.0755	0.0012	469.2	7.3	515.4	12.1	725.4	84	8.96391	35.3184	8.96391	469.2	7.3	Wang et al. (2016)
ZJS2-22	0.85	0.1464	0.0047	8.7666	0.156	0.4343	0.0067	2324.9	30.3	2314	16.2	2304	54.2	-0.471046	-0.907118	-0.907118	2304	54.2	Wang et al. (2016)
ZJS2-23	0.93	0.1652	0.0052	11.0498	0.1863	0.4851	0.0074	2549.2	32.1	2527.3	15.7	2509.5	52.3	-0.866537	-1.58199	-1.58199	2509.5	52.3	Wang et al. (2016)
ZJS2-24	0.18	0.1219	0.004	6.3266	0.1213	0.3762	0.0059	2058.7	27.7	2022.2	16.8	1984.8	57.5	-1.80496	-3.7233	-3.7233	1984.8	57.5	Wang et al. (2016)
ZJS2-25	0.79	0.1272	0.0041	2.7896	0.0482	0.1591	0.0024	951.7	13.2	1352.8	12.9	2059.3	55.5	29.6496	53.7853	29.6496	-	-	Wang et al. (2016)
ZJS2-26	0.43	0.1231	0.0039	6.4585	0.1061	0.3805	0.0057	2078.5	26.5	2040.3	14.5	2002	54.9	-1.87227	-3.82118	-3.82118	2002	54.9	Wang et al. (2016)
ZJS2-27	0.53	0.1296	0.0043	6.9934	0.1379	0.3913	0.0062	2129	28.9	2110.6	17.5	2092.9	57.2	-0.87179	-1.72488	-1.72488	2092.9	57.2	Wang et al. (2016)
ZJS2-28	0.37	0.2328	0.0075	19.7009	0.3709	0.6139	0.0102	3085.6	40.8	3076.8	18.2	3071.3	50.8	-0.286011	-0.465601	-0.465601	3071.3	50.8	Wang et al. (2016)
ZJS2-29	0.75	0.1846	0.0058	12.8667	0.2091	0.5057	0.0076	2638.4	32.6	2669.9	15.3	2694.2	50.9	1.17982	2.07112	2.07112	2694.2	50.9	Wang et al. (2016)
ZJS2-30	1.01	0.0502	0.0024	0.3624	0.0143	0.0523	0.0009	328.9	5.3	314	10.7	205.8	108.3	-4.74522	-59.8154	-4.74522	328.9	5.3	Wang et al. (2016)
ZJS2-31	0.68	0.0528	0.0024	0.3728	0.0131	0.0512	0.0008	322	5.1	321.7	9.7	320.6	98.1	-0.0932546	-0.436681	-0.0932546	322	5.1	Wang et al. (2016)
ZJS2-32	0.64	0.1574	0.005	7.9359	0.13	0.3659	0.0055	2010.2	25.8	2223.8	14.8	2427.4	52.4	9.60518	17.1871	17.1871	-	-	Wang et al. (2016)
ZJS2-33	0.57	0.0551	0.0022	0.5012	0.0142	0.0661	0.001	412.4	6.2	412.5	9.6	414.2	85.3	0.0242424	0.434573	0.0242424	412.4	6.2	Wang et al. (2016)
ZJS2-34	1.42	0.0659	0.0023	1.2289	0.0268	0.1352	0.0021	817.6	11.6	813.9	12.2	804.5	71.1	-0.454601	-1.62834	-0.454601	817.6	11.6	Wang et al. (2016)
ZJS2-35	0.68	0.054	0.0021	0.3625	0.0099	0.0487	0.0008	306.8	4.6	314.1	7.4	369.7	84.7	2.3241	17.0138	2.3241	306.8	4.6	Wang et al. (2016)
ZJS2-36	0.99	0.1182	0.0041	5.4398	0.1205	0.3339	0.0055	1857.2	26.5	1891.1	19	1929.5	60.9	1.79261	3.74708	3.74708	1929.5	60.9	Wang et al. (2016)
ZJS2-37	0.93	0.0537	0.0025	0.4791	0.0174	0.0647	0.0011	404.2	6.4	397.5	12	359.6	99.2	-1.68553	-12.4027	-1.68553	404.2	6.4	Wang et al. (2016)
ZJS2-38-1	1.18	0.057	0.0024	0.5234	0.0169	0.0667	0.0011	416.1	6.5	427.4	11.3	489.9	91.4	2.64389	15.0643	2.64389	416.1	6.5	Wang et al. (2016)
ZJS2-38-2	0.54	0.0541	0.0029	0.4815	0.0218	0.0646	0.0011	403.4	6.8	399.1	14.9	375.5	114.9	-1.07742	-7.43009	-1.07742	403.4	6.8	Wang et al. (2016)
ZJS2-39	1.05	0.0566	0.0026	0.5048	0.0185	0.0647	0.0011	404.1	6.5	414.9	12.5	476.6	99.2	2.60304	15.2119	2.60304	404.1	6.5	Wang et al. (2016)
ZJS2-40	0.61	0.0592	0.0033	0.5953	0.0285	0.073	0.0013	454	8	474.2	18.1	575	116.3	4.25981	21.0435	4.25981	454	8	Wang et al. (2016)
ZJS2-41	0.75	0.054	0.0034	0.4767	0.0266	0.0641	0.0012	400.2	7.2	395.8	18.3	372	134.9	-1.11167	-7.58065	-1.11167	400.2	7.2	Wang et al. (2016)
ZJS2-42	0.23	0.1166	0.0039	3.98	0.0765	0.2477	0.0038	1426.7	19.6	1630.1	15.6	1905.2	58.2	12.4778	25.1155	25.1155	-	-	Wang et al. (2016)
ZJS2-43	0.63	0.1698	0.0056	11.5459	0.2203	0.4935	0.008	2585.9	34.4	2568.3	17.8	2556	53.7	-0.685278	-1.1698	-1.1698	2556	53.7	Wang et al. (2016)
ZJS2-44	0.52	0.1246	0.0042	6.5006	0.1349	0.3787	0.0061	2070.3	28.5	2046	18.3	2023.3	58.6	-1.18768	-2.32294	-2.32294	2023.3	58.6	Wang et al. (2016)
ZJS2-45	1.39	0.0564	0.0035	0.5095	0.0278	0.0656	0.0013	409.4	7.7	418.1	18.7	468.2	131.6	2.08084	12.5587	2.08084	409.4	7.7	Wang et al. (2016)
ZJS2-46	0.66	0.0563	0.0023	0.4919	0.015	0.0634	0.001	396.5	6	406.2	10.2	463.1	89.1	2.38799	14.3813	2.38799	396.5	6	Wang et al. (2016)
ZJS2-47	0.88	0.0574	0.0024	0.5684	0.0185	0.072	0.0012	447.9	6.9	457	12	504.7	91.4	1.99125	11.2542	1.99125	447.9	6.9	Wang et al. (2016)
ZJS2-48	0.52	0.057	0.0023	0.555	0.0159	0.0707	0.0011	440.1	6.6	448.2	10.4	492.1	85.4	1.80723	10.567	1.80723	440.1	6.6	Wang et al. (2016)
ZJS2-49	0.84	0.0592	0.0028	0.548	0.0212	0.0673	0.0011	419.7	6.8	443.7	13.9	572.9	100.3	5.40906	26.7411	5.40906	419.7	6.8	Wang et al. (2016)
ZJS2-50	1.01	0.0536	0.0021	0.4711	0.0133	0.0639	0.001	399.1	5.9	392	9.2	352.7	86.2	-1.81122	-13.1557	-1.81122	399.1	5.9	Wang et al. (2016)
ZJS2-51	2.16	0.0543	0.0022	0.4964	0.0148	0.0664	0.001	414.1	6.2	409.3	10	384.6	87.5	-1.17273	-7.67031	-1.17273	414.1	6.2	Wang et al. (2016)
ZJS2-52	0.84	0.0685	0.0024	1.5431	0.0359	0.1636	0.0025	976.7	13.9	947.7	14.3	883.8	72	-3.06004	-10.5114	-3.06004	976.7	13.9	Wang et al. (2016)
ZJS2-53	1.12	0.0545	0.0025	0.3737	0.0134	0.0498	0.0008	313.4	4.9	322.4	9.9	391.2	97.6	2.79156	19.8875	2.79156	313.4	4.9	Wang et al. (2016)
ZJS2-54	0.5	0.0563	0.0022	0.5631	0.015	0.0726	0.0011	451.7	6.6	453.5	9.8	464.7	83	0.396913	2.7975	0.396913	451.7	6.6	Wang et al. (2016)
ZJS2-55	0.53	0.055	0.002	0.5461	0.0131	0.0721	0.0011	449	6.5	442.4	8.6	411	78.5	-1.49186	-9.24574	-1.49186	449	6.5	Wang et al. (2016)
ZJS2-56	0.97	0.0537	0.002	0.3546	0.009	0.048	0.0007	302	4.4	308.2	6.8	358	81.6	2.01168	15.6425	2.01168	302	4.4	Wang et al. (2016)
ZJS2-57	0.96	0.0564	0.0022	0.5988	0.0165	0.0771	0.0012	479.1	7.1	476.4	10.5	466.3	84.3	-0.566751	-2.74501	-0.566751	479.1	7.1	Wang et al. (2016)
ZJS2-58	0.62	0.0742	0.003	1.594	0.0482	0.156	0.0026	934.5	14.4	967.8	18.9	1047.4	79.8	3.44079	10.7791	3.44079	934.5	14.4	Wang et al. (2016)
ZJS2-59	0.4	0.1523	0.0047	9.1812	0.1429	0.4377	0.0064	2340.5	28.5	2356.2	14.3	2372.4	51.8	0.666327	1.34463	1.34463	2372.4	51.8	Wang et al. (2016)
ZJS2-60	0.84	0.0571	0.0028	0.5123	0.0202	0.0652	0.0011	407.1	6.6	420	13.5	494.1	103.3	3.07143	17.6078	3.07143	407.1	6.6	Wang et al. (2016)
ZJS3-1	1.19	0.0984	0.0033	4.024	0.0783	0.2967	0.0046	1675.1	22.8	1639.1	15.8	1593.1	60.5	-2.19633	-5.1472	-5.1472	1593.1	60.5	Wang et al. (2016)
ZJS3-2-1	0.44	0.1174	0.0039	3.9515	0.0782	0.2441	0.0038	1408.1	19.8	1624.3	16	1916.9	58.5	13.3103	26.5429	26.5429	-	-	Wang et al. (2016)
ZJS3-2-2	0.71	0.1241	0.004	4.0031	0.0694	0.2339	0.0035	1354.8	18.4	1634.8	14.1	2016.5	55.5	17.1275	32.8143	32.8143	-	-	Wang et al. (2016)
ZJS3-3	0.02	0.0708	0.0022	1.7197	0.0282	0.1763	0.0026	1046.6	14.1	1015.9	10.5	950.4	63	-3.02195	-10.1221	-10.1221	-	-	Wang et al. (2016)
ZJS3-4	0.36	0.12	0.0039	5.5011	0.1021	0.3324	0.0051	1849.8	24.8	1900.8	16	1956.9	56.9	2.68308	5.47294	5.47294	1956.9	56.9	Wang et al. (2016)
ZJS3-5	1.18	0.0754	0.0027	1.9259	0.0469	0.1853	0.0029	1096	16	1090.1	16.3	1078.4	71.1	-0.541235	-1.63205	-1.63205	1078.4	71.1	Wang et al. (2016)
ZJS3-6	0.74	0.057	0.0022	0.5647	0.0149	0.0719	0.0011	447.5	6.7	454.6	9.7	490.3	81.9	1.56181	8.72935	1.56181	447.5	6.7	Wang et al. (2016)
ZJS3-7	0.27	0.1613	0.005	10.68	0.1674	0.4802	0.0071	2527.9	30.9	2495.7	14.6	2469.6	51.3	-1.29022	-2.36071	-2.36071	2469.6	51.3	Wang et al. (2016)
ZJS3-8	0.86	0.1614	0.005	10.5454	0.1612	0.4739	0.0069	2500.4	30.3	2483.9	14.2	2470.5	51	-0.664278	-1.21028	-1.21028	2470.5	51	Wang et al. (2016)
ZJS3-9	0.43	0.0829	0.0028	1.0731	0.0212	0.0939	0.0014	578.6	8.3	740.3	10.4	1266.3	63.7	21.8425	54.3078	21.8425	-	-	Wang et al. (2016)
ZJS3-10	0.53	0.1181	0.0037	4.0778	0.0656	0.2505	0.0037	1441.1	19	1649.9	13.1	1927	54.8	12.6553	25.2154	25.2154	-	-	Wang et al. (2016)
ZJS3-11	0.69	0.0567	0.0023	0.5887	0.0175	0.0753	0.0012	468.2	7.1	470.1	11.2	478.3	87.3	0.404169	2.11165	0.404169	468.2	7.1	Wang et al. (2016)
ZJS3-12	0.9	0.0578	0.0023	0.5948	0.0169	0.0746	0.0012	464	7	473.9	10.8	522.2	84.2	2.08905	11.1452	2.08905	464	7	Wang et al. (2016)
ZJS3-13	0.68	0.0569	0.0019	0.5685	0.0117	0.0725	0.0011	451.1	6.5	457	7.6	486.2	73.7	1.29103	7.21925	1.29103	451.1	6.5	Wang et al. (2016)
ZJS3-14	0.98	0.0672	0.0025	0.6672	0.0164	0.072	0.0011	448.4	6.6	519	10	843.1	74.2	13.6031	46.8153	13.6031	-	-	Wang et al. (2016)
ZJS3-15	0.68	0.1566	0.0049	9.497	0.1494	0.4398	0.0065	2349.7	29	2387.3	14.5	2419.4	51.6	1.575	2.88088	2.88088	2419.4	51.6	Wang et al. (2016)
ZJS3-16	0.72	0.0663	0.0028	0.5211	0.0165	0.057	0.0009	357.4	5.6	425.9	11	816	85.2	16.0836	56.201	16.0836	-	-	Wang et al. (2016)
ZJS3-17	0.21	0.1041	0.0032	1.4064	0.0224	0.098	0.0014	602.4	8.3	891.6	9.4	1699	56.3	32.4361	64.5438	32.4361	-	-	Wang et al. (2016)
ZJS3-18	0.58	0.0586	0.002	0.7235	0.0156	0.0895	0.0013	552.6	7.9	552.7	9.2	553.1	73.6	0.018093	0.0903996	0.018093	552.6	7.9	Wang et al. (2016)
ZJS3-19	0.68	0.1116	0.0035	1.3392	0.021	0.087	0.0013	537.9	7.4	862.9	9.1	1825.9	55.2	37.6637	70.5406	37.6637	-	-	Wang et al. (2016)
ZJS3-20	0.44	0.0829	0.0028	2.4223	0.052	0.2119	0.0033	1238.9	17.4	1249.2	15.4	1267.1	65.5	0.824528	2.22555	2.22555	1267.1	65.5	Wang et al. (2016)
ZJS3-21	0.71	0.1107	0.0036	4.9793	0.0943	0.3263	0.005	1820.2	24.3	1815.8	16	1810.8	58.2	-0.242317	-0.519108	-0.519108	1810.8	58.2	Wang et al. (2016)
ZJS3-22	0.59	0.1966	0.0062	14.6098	0.2504	0.5389	0.0083	2778.7	34.9	2790.2	16.3	2798.5	50.6	0.412157	0.707522	0.707522	2798.5	50.6	Wang et al. (2016)
ZJS3-23	0.34	0.072	0.0024	1.5568	0.0297	0.1568	0.0023	938.9	12.9	953.2	11.8	986.5	65.5	1.50021	4.82514	1.50021	938.9	12.9	Wang et al. (2016)
ZJS3-24	1.21	0.088	0.0035	0.7923	0.0229	0.0653	0.0011	407.9	6.4	592.5	13	1381.7	74.6	31.1561	70.4784	31.1561	-	-	Wang et al. (2016)
ZJS3-25	0.65	0.0587	0.0023	0.583	0.0164	0.0721	0.0011	448.5	6.7	466.4	10.5	555.2	83	3.83791	19.2183	3.83791	448.5	6.7	Wang et al. (2016)
ZJS3-26	1.02	0.128	0.0041	4.2294	0.077	0.2397	0.0036	1385.1	18.8	1679.7	15	2070.3	55.9	17.5388	33.0967	33.0967	-	-	Wang et al. (2016)
ZJS3-27	0.65	0.1491	0.0046	6.8342	0.1066	0.3323	0.0048	1849.7	23.3	2090.2	13.8	2336.1	52	11.5061	20.821	20.821	-	-	Wang et al. (2016)
ZJS3-28	0.94	0.1565	0.005	9.8366	0.1707	0.4557	0.007	2420.6	30.8	2419.6	16	2418.7	52.8	-0.0413291	-0.0785546	-0.0785546	2418.7	52.8	Wang et al. (2016)
ZJS3-29	1.06	0.0594	0.0022	0.5883	0.0148	0.0719	0.0011	447.3	6.5	469.8	9.5	580.9	78.2	4.78927	22.9988	4.78927	447.3	6.5	Wang et al. (2016)
ZJS3-30	0.67	0.1377	0.0044	2.439	0.0425	0.1285	0.0019	779.1	10.9	1254.2	12.6	2198.4	54.2	37.8807	64.5606	37.8807	-	-	Wang et al. (2016)
ZJS3-31	0.73	0.1065	0.0034	1.7571	0.0301	0.1197	0.0018	728.9	10.1	1029.8	11.1	1739.6	56.7	29.2193	58.0996	29.2193	-	-	Wang et al. (2016)
ZJS3-32	0.42	0.1354	0.0042	4.7353	0.0751	0.2537	0.0037	1457.4	19	1773.5	13.3	2169	52.7	17.8235	32.8077	32.8077	-	-	Wang et al. (2016)
ZJS3-33	0.5	0.1582	0.0049	8.3153	0.1394	0.3813	0.0057	2082.5	26.8	2266	15.2	2436.2	51.9	8.09797	14.5185	14.5185	-	-	Wang et al. (2016)
ZJS3-34	0.15	0.07	0.0022	1.5905	0.0275	0.1649	0.0024	983.8	13.3	966.5	10.8	927.7	63.6	-1.78996	-6.04721	-1.78996	983.8	13.3	Wang et al. (2016)
ZJS3-35	0.59	0.1465	0.0045	7.2954	0.1176	0.3612	0.0053	1987.9	25.3	2148.2	14.4	2305.7	52.1	7.46206	13.7832	13.7832	-	-	Wang et al. (2016)
ZJS3-36	0.9	0.0638	0.0022	0.6613	0.015	0.0752	0.0011	467.6	6.8	515.4	9.2	734.5	72.4	9.27435	36.3376	9.27435	467.6	6.8	Wang et al. (2016)
ZJS3-37	0.52	0.1155	0.004	5.4599	0.1213	0.3431	0.0057	1901.3	27.1	1894.3	19.1	1887.4	60.5	-0.36953	-0.736463	-0.736463	1887.4	60.5	Wang et al. (2016)
ZJS3-38	0.99	0.0532	0.0021	0.5348	0.0153	0.073	0.0011	454.1	6.8	435	10.2	336	86.4	-4.3908	-35.1488	-4.3908	454.1	6.8	Wang et al. (2016)
ZJS3-39	0.18	0.0552	0.002	0.5363	0.0129	0.0705	0.0011	439.1	6.4	436	8.6	420.7	77.9	-0.711009	-4.37366	-0.711009	439.1	6.4	Wang et al. (2016)
ZJS3-40	0.28	0.1215	0.0038	4.222	0.071	0.2521	0.0037	1449.4	19.3	1678.3	13.8	1978.7	54.6	13.6388	26.7499	26.7499	-	-	Wang et al. (2016)
ZJS3-41	0.69	0.0586	0.0023	0.4355	0.0128	0.054	0.0009	338.8	5.2	367	9	551.3	84.5	7.68392	38.5453	7.68392	338.8	5.2	Wang et al. (2016)
ZJS3-42	0.46	0.109	0.0034	4.5439	0.0764	0.3027	0.0045	1704.9	22.3	1739	14	1782	55.8	1.9609	4.3266	4.3266	1782	55.8	Wang et al. (2016)
ZJS3-43	1.27	0.0534	0.0022	0.3998	0.0124	0.0543	0.0009	341	5.3	341.5	9	347.3	89.9	0.146413	1.81399	0.146413	341	5.3	Wang et al. (2016)
ZJS3-44	0.51	0.1506	0.0047	9.0079	0.1478	0.4343	0.0065	2325.1	29.4	2338.8	15	2352.6	51.8	0.58577	1.16892	1.16892	2352.6	51.8	Wang et al. (2016)
ZJS3-45	0.79	0.0691	0.0024	1.5113	0.0329	0.1587	0.0024	949.8	13.5	935	13.3	902.6	68.9	-1.58289	-5.22934	-1.58289	949.8	13.5	Wang et al. (2016)
ZJS3-46	0.58	0.07	0.0032	0.5885	0.0215	0.0611	0.0011	382.2	6.4	469.9	13.8	926.9	91	18.6635	58.7658	18.6635	-	-	Wang et al. (2016)
ZJS3-47	0.62	0.0629	0.0023	0.6053	0.0151	0.0699	0.0011	435.3	6.5	480.6	9.6	705.4	75.8	9.42572	38.2903	9.42572	435.3	6.5	Wang et al. (2016)
ZJS3-48	0.54	0.1205	0.0037	3.5717	0.0571	0.2153	0.0032	1256.8	16.8	1543.3	12.7	1963.7	53.8	18.5641	35.9984	35.9984	-	-	Wang et al. (2016)
ZJS3-49	0.73	0.0707	0.0023	1.7746	0.0325	0.1823	0.0027	1079.6	14.8	1036.2	11.9	948.6	64.1	-4.18838	-13.8098	-13.8098	-	-	Wang et al. (2016)
ZJS3-50	1.04	0.0805	0.0029	0.7548	0.0179	0.0681	0.0011	424.7	6.4	571	10.4	1209.6	68.4	25.6217	64.8892	25.6217	-	-	Wang et al. (2016)
ZJS3-51	1.67	0.1573	0.0048	9.8114	0.158	0.4533	0.0068	2409.7	30.3	2417.2	14.8	2426.3	51	0.310276	0.684169	0.684169	2426.3	51	Wang et al. (2016)
ZJS3-52	0.97	0.0634	0.0022	0.6377	0.015	0.073	0.0011	454.4	6.7	500.9	9.3	722.7	73.3	9.28329	37.1247	9.28329	454.4	6.7	Wang et al. (2016)
ZJS3-53	0.85	0.0557	0.0022	0.455	0.013	0.0594	0.0009	371.7	5.7	380.8	9.1	439.9	84.5	2.38971	15.5035	2.38971	371.7	5.7	Wang et al. (2016)
ZJS3-54	1.1	0.066	0.0025	0.6967	0.019	0.0767	0.0012	476.4	7.3	536.8	11.4	806.6	77.6	11.2519	40.9373	11.2519	-	-	Wang et al. (2016)
ZJS3-55	0.53	0.112	0.0035	3.7567	0.064	0.2438	0.0037	1406.3	19	1583.6	13.7	1832.2	55.4	11.196	23.2453	23.2453	-	-	Wang et al. (2016)
ZJS3-56	0.71	0.0543	0.0021	0.5429	0.0152	0.0727	0.0012	452.4	6.9	440.3	10	382.4	83.8	-2.74813	-18.3054	-2.74813	452.4	6.9	Wang et al. (2016)
ZJS3-57	1.03	0.1093	0.0034	1.7024	0.028	0.1132	0.0017	691.3	9.7	1009.4	10.5	1788	55.3	31.5138	61.3367	31.5138	-	-	Wang et al. (2016)
ZJS3-58	0.96	0.0632	0.0023	0.5898	0.0147	0.0679	0.0011	423.3	6.4	470.8	9.4	714.1	75.4	10.0892	40.7226	10.0892	-	-	Wang et al. (2016)
ZJS3-60	0.84	0.0571	0.0028	0.5123	0.0202	0.0652	0.0011	407.1	6.6	420	13.5	494.1	103.3	3.07143	17.6078	3.07143	407.1	6.6	Wang et al. (2016)
ZJS3-59	1.47	0.0569	0.0022	0.5821	0.0164	0.0744	0.0012	462.6	7.1	465.8	10.5	486.6	83.8	0.68699	4.93218	0.68699	462.6	7.1	Wang et al. (2016)
ZJS3-60	0.73	0.0834	0.0026	1.9137	0.0342	0.1668	0.0025	994.4	13.9	1085.9	11.9	1279	60.6	8.42619	22.2518	8.42619	994.4	13.9	Wang et al. (2016)
ZJS4-1	0.43	0.0724	0.0016	1.7829	0.0368	0.1788	0.0015	1060.5	8	1039.2	13.4	996.6	45.5	-2.04965	-6.4118	-6.4118	996.6	45.5	Wang et al. (2016)
ZJS4-2	0.46	0.1592	0.0018	9.6864	0.0693	0.4417	0.0025	2358.3	11.1	2405.4	6.6	2447.1	19.3	1.95809	3.62879	3.62879	2447.1	19.3	Wang et al. (2016)
ZJS4-3	0.49	0.0851	0.0015	0.8318	0.012	0.071	0.0005	442	2.8	614.6	6.6	1317.1	33.4	28.0833	66.4414	28.0833	-	-	Wang et al. (2016)
ZJS4-4	0.78	0.0942	0.0012	3.1161	0.0284	0.2403	0.0014	1388	7.1	1436.7	7	1511.1	24.2	3.38971	8.14638	8.14638	1511.1	24.2	Wang et al. (2016)
ZJS4-5	0.37	0.1266	0.0016	6.683	0.0605	0.3832	0.0024	2091.2	11	2070.4	8	2051.2	22.3	-1.00464	-1.95008	-1.95008	2051.2	22.3	Wang et al. (2016)
ZJS4-6	0.29	0.1157	0.0014	5.4121	0.0426	0.3396	0.0019	1884.6	9.1	1886.8	6.8	1890.7	21.4	0.1166	0.322632	0.322632	1890.7	21.4	Wang et al. (2016)
ZJS4-7	0.42	0.1431	0.0018	5.9079	0.0489	0.2998	0.0018	1690.1	8.7	1962.4	7.2	2264.6	21	13.8759	25.3687	25.3687	-	-	Wang et al. (2016)
ZJS4-8	0.5	0.1455	0.0018	7.0184	0.0619	0.3501	0.0022	1935.2	10.3	2113.8	7.8	2293.7	21.4	8.44924	15.6298	15.6298	-	-	Wang et al. (2016)
ZJS4-9	0.64	0.1655	0.0021	5.5313	0.0477	0.2426	0.0015	1400.2	7.6	1905.5	7.4	2512.7	20.9	26.518	44.2751	44.2751	-	-	Wang et al. (2016)
ZJS4-10	0.2	0.1077	0.0014	2.3947	0.0227	0.1613	0.0009	964.2	5.2	1241	6.8	1761.5	23.9	22.3046	45.2626	22.3046	-	-	Wang et al. (2016)
ZJS4-11	0.48	0.1523	0.002	6.8633	0.0683	0.3272	0.0022	1824.7	10.6	2093.9	8.8	2371.5	22.6	12.8564	23.0571	23.0571	-	-	Wang et al. (2016)
ZJS4-12	0.69	0.0805	0.0015	2.4234	0.0402	0.2184	0.0016	1273.5	8.7	1249.6	11.9	1210.1	36.8	-1.91261	-5.23924	-5.23924	1210.1	36.8	Wang et al. (2016)
ZJS4-13	0.19	0.0679	0.001	1.5097	0.0167	0.1615	0.0009	964.8	5.1	934.3	6.8	864.8	29.5	-3.26448	-11.5634	-3.26448	964.8	5.1	Wang et al. (2016)
ZJS4-14	0.66	0.1607	0.0024	10.5574	0.1319	0.4768	0.004	2513.4	17.3	2485	11.6	2463.2	25	-1.14286	-2.038	-2.038	2463.2	25	Wang et al. (2016)
ZJS4-15	0.16	0.0853	0.0014	0.8331	0.011	0.0709	0.0004	441.3	2.6	615.3	6.1	1323	31.2	28.2789	66.644	28.2789	-	-	Wang et al. (2016)
ZJS4-16	0.62	0.0669	0.0013	1.2089	0.0205	0.1311	0.0009	794.2	5.2	804.7	9.4	835.6	39.9	1.30483	4.95452	1.30483	794.2	5.2	Wang et al. (2016)
ZJS4-17	0.22	0.0569	0.0014	0.5494	0.0118	0.0701	0.0005	436.9	3.1	444.6	7.7	485.6	51.5	1.73189	10.0288	1.73189	436.9	3.1	Wang et al. (2016)
ZJS4-18	0.53	0.0564	0.0013	0.3629	0.0075	0.0467	0.0003	294.1	1.9	314.4	5.6	468.4	50.3	6.45674	37.2118	6.45674	294.1	1.9	Wang et al. (2016)
ZJS4-19	0.45	0.155	0.0021	9.1872	0.0946	0.4303	0.003	2307.1	13.7	2356.8	9.4	2401.4	22.6	2.10879	3.92688	3.92688	2401.4	22.6	Wang et al. (2016)
ZJS4-20	0.35	0.0698	0.0014	0.7087	0.0126	0.0737	0.0005	458.5	3	544	7.5	921.8	41.1	15.7169	50.2604	15.7169	-	-	Wang et al. (2016)
ZJS4-21	0.25	0.1501	0.0019	8.9399	0.0826	0.4323	0.0028	2316.2	12.7	2331.9	8.4	2346.9	21.5	0.673271	1.30811	1.30811	2346.9	21.5	Wang et al. (2016)
ZJS4-22	0.64	0.0923	0.0014	3.4718	0.0427	0.273	0.0018	1555.8	9.2	1520.8	9.7	1473.7	28.7	-2.30142	-5.57101	-5.57101	1473.7	28.7	Wang et al. (2016)
ZJS4-23	0.48	0.3269	0.0036	33.2994	0.2414	0.7393	0.0047	3567.9	17.6	3589.5	7.2	3602.7	17	0.601755	0.965942	0.965942	3602.7	17	Wang et al. (2016)
ZJS4-24	0.45	0.073	0.001	1.7003	0.0169	0.1691	0.0009	1007.2	5.2	1008.6	6.3	1013.1	27	0.138806	0.582371	0.582371	1013.1	27	Wang et al. (2016)
ZJS4-25	0.87	0.0579	0.0011	0.467	0.0078	0.0586	0.0004	367	2.3	389.1	5.4	524.3	41.9	5.67977	30.0019	5.67977	367	2.3	Wang et al. (2016)
ZJS4-26	0.94	0.1461	0.0019	1.9998	0.0184	0.0994	0.0006	610.6	3.4	1115.4	6.2	2300.5	22.2	45.2573	73.4579	45.2573	-	-	Wang et al. (2016)
ZJS4-27	0.94	0.0574	0.0014	0.4406	0.0098	0.0558	0.0004	349.8	2.5	370.7	6.9	504.7	53.1	5.63798	30.6915	5.63798	349.8	2.5	Wang et al. (2016)
ZJS4-28	0.44	0.1198	0.0029	5.6359	0.1278	0.3413	0.004	1893.1	19.3	1921.6	19.6	1953.7	42.2	1.48314	3.10181	3.10181	1953.7	42.2	Wang et al. (2016)
ZJS4-29	1.14	0.1478	0.0021	8.4687	0.0941	0.4159	0.0031	2241.9	13.9	2282.6	10.1	2320.3	23.8	1.78305	3.37887	3.37887	2320.3	23.8	Wang et al. (2016)
ZJS4-30	0.75	0.0626	0.0017	0.7932	0.0198	0.092	0.0008	567.2	4.5	593	11.2	694.3	56.3	4.35076	18.3062	4.35076	567.2	4.5	Wang et al. (2016)
ZJS4-31	0.43	0.0982	0.0016	0.6447	0.0083	0.0477	0.0003	300.1	1.8	505.2	5.1	1590.1	29.6	40.5978	81.127	40.5978	-	-	Wang et al. (2016)
ZJS4-32	0.41	0.1244	0.0017	1.8531	0.0177	0.1081	0.0006	661.7	3.7	1064.5	6.3	2020.3	23.3	37.8394	67.2474	37.8394	-	-	Wang et al. (2016)
ZJS4-33	0.32	0.1025	0.0014	1.6477	0.0162	0.1166	0.0007	711.2	3.9	988.7	6.2	1670.2	24.6	28.0672	57.4183	28.0672	-	-	Wang et al. (2016)
ZJS4-34	1.22	0.0606	0.0015	0.4702	0.0108	0.0563	0.0004	353	2.6	391.3	7.4	625.8	53	9.78789	43.5922	9.78789	353	2.6	Wang et al. (2016)
ZJS4-35	0.78	0.1506	0.0019	4.0623	0.037	0.1957	0.0012	1152.4	6.4	1646.8	7.4	2352.9	21.7	30.0219	51.0221	51.0221	-	-	Wang et al. (2016)
ZJS4-36	0.52	0.1104	0.0013	2.4387	0.0196	0.1603	0.0009	958.4	4.8	1254.1	5.8	1806.1	21.8	23.5787	46.9354	23.5787	-	-	Wang et al. (2016)
ZJS4-37	0.84	0.1432	0.0019	6.7075	0.0679	0.34	0.0023	1886.7	11	2073.6	9	2265.8	22.8	9.01331	16.7314	16.7314	-	-	Wang et al. (2016)
ZJS4-38	0.47	0.1151	0.0016	5.4876	0.0604	0.3459	0.0023	1914.8	11.2	1898.7	9.5	1882	25	-0.847949	-1.74283	-1.74283	1882	25	Wang et al. (2016)
ZJS4-39	0.39	0.1252	0.0018	3.745	0.0405	0.217	0.0014	1266	7.5	1581	8.7	2032.2	24.6	19.9241	37.703	37.703	-	-	Wang et al. (2016)
ZJS4-40	0.71	0.1139	0.0014	5.5628	0.0489	0.3544	0.0021	1955.6	10	1910.4	7.6	1862.5	22.2	-2.366	-4.99866	-4.99866	1862.5	22.2	Wang et al. (2016)
ZJS4-41	0.74	0.0759	0.0012	2.0023	0.0252	0.1914	0.0012	1128.9	6.5	1116.3	8.5	1093	30.7	-1.12873	-3.28454	-3.28454	1093	30.7	Wang et al. (2016)
ZJS4-42	0.76	0.0634	0.0015	1.1587	0.025	0.1327	0.001	803.2	5.9	781.3	11.7	720.4	49.2	-2.80302	-11.4936	-2.80302	803.2	5.9	Wang et al. (2016)
ZJS4-43	0.35	0.1631	0.0018	8.1027	0.0542	0.3606	0.002	1985	9.2	2242.5	6	2487.6	18.5	11.4827	20.2042	20.2042	-	-	Wang et al. (2016)
ZJS4-44	0.57	0.0564	0.0014	0.4582	0.0107	0.059	0.0004	369.2	2.7	383	7.5	467.5	55.8	3.60313	21.0267	3.60313	369.2	2.7	Wang et al. (2016)
ZJS4-45	0.72	0.1544	0.002	8.3204	0.0804	0.391	0.0026	2127.3	12.1	2266.5	8.8	2395.5	21.8	6.14163	11.196	11.196	-	-	Wang et al. (2016)
ZJS4-46	0.51	0.1575	0.0019	9.5168	0.0807	0.4383	0.0027	2343.2	12.3	2389.2	7.8	2429.4	20.3	1.92533	3.5482	3.5482	2429.4	20.3	Wang et al. (2016)
ZJS4-47	0.43	0.0846	0.0011	2.5802	0.0262	0.2212	0.0013	1288.2	6.8	1295	7.4	1307.2	26	0.525097	1.45349	1.45349	1307.2	26	Wang et al. (2016)
ZJS4-48	1.03	0.0828	0.0017	2.3047	0.0438	0.202	0.0017	1186.1	9	1213.7	13.5	1264.1	40.4	2.27404	6.1704	6.1704	1264.1	40.4	Wang et al. (2016)
ZJS4-49	0.32	0.0688	0.0011	1.5177	0.0188	0.16	0.001	956.8	5.4	937.5	7.6	893.4	31.3	-2.05867	-7.09649	-2.05867	956.8	5.4	Wang et al. (2016)
ZJS4-50	0.24	0.1256	0.0014	3.5463	0.0244	0.2049	0.0011	1201.5	5.7	1537.6	5.5	2037.1	19.6	21.8587	41.0191	41.0191	-	-	Wang et al. (2016)
ZJS4-51	0.55	0.1415	0.0016	4.3131	0.031	0.2212	0.0012	1288.3	6.3	1695.9	5.9	2245.3	19.5	24.0344	42.6224	42.6224	-	-	Wang et al. (2016)
ZJS4-52	0.07	0.104	0.0014	1.3638	0.0127	0.0951	0.0005	585.8	3.1	873.5	5.5	1696.9	23.7	32.9365	65.4782	32.9365	-	-	Wang et al. (2016)
ZJS4-53	0.6	0.0576	0.0017	0.5737	0.0161	0.0722	0.0006	449.6	3.7	460.4	10.4	515.4	64.7	2.34579	12.7668	2.34579	449.6	3.7	Wang et al. (2016)
ZJS4-54	0.66	0.1482	0.0018	7.7566	0.068	0.3798	0.0024	2075.2	11.1	2203.2	7.9	2325.2	20.9	5.80973	10.7518	10.7518	-	-	Wang et al. (2016)
ZJS4-55	0.06	0.073	0.001	1.8165	0.0176	0.1806	0.001	1070.1	5.5	1051.4	6.4	1013.6	26.4	-1.77858	-5.57419	-5.57419	1013.6	26.4	Wang et al. (2016)
ZJS4-56	0.71	0.0574	0.0014	0.5828	0.0128	0.0736	0.0005	457.9	3.3	466.3	8.2	508	52.4	1.80142	9.8622	1.80142	457.9	3.3	Wang et al. (2016)
ZJS4-57	0.39	0.1128	0.0015	2.8284	0.0266	0.182	0.0011	1077.7	5.8	1363.1	7.1	1844.5	23.2	20.9376	41.5722	41.5722	-	-	Wang et al. (2016)
ZJS4-58	1.02	0.0552	0.0015	0.5531	0.0138	0.0727	0.0006	452.4	3.4	447	9	420.2	58.1	-1.20805	-7.66302	-1.20805	452.4	3.4	Wang et al. (2016)
ZJS4-59	0.27	0.0702	0.0009	1.637	0.0156	0.1692	0.0009	1007.6	5.1	984.6	6	934.4	26.4	-2.33597	-7.8339	-7.8339	934.4	26.4	Wang et al. (2016)
ZJS4-60	0.72	0.0519	0.0012	0.3602	0.0073	0.0503	0.0003	316.5	2.1	312.4	5.5	282.6	50.6	-1.31242	-11.9958	-1.31242	316.5	2.1	Wang et al. (2016)
Site 16: Jinzhong
Sample	Th/U	207Pb/206Pb	Error	207Pb/235U	Error	206Pb/238U	Error	238U-206Pb date	Error	235U-207Pb date	Error	207Pb-206Pb date	Error	Discordance 1 (238U–206Pb vs 235U–207Pb)	Discordance 2 (238U–206Pb vs 207Pb–206Pb)	Discordance	Preferred Age	Error	Data source
Name			1σ		1σ		1σ	(Ma)	1σ	(Ma)	1σ	(Ma)	1σ	(%)	(%)	(%)	(Ma)	1σ
HL1-1.1	1	0.1141	0.0025102	5.24	0.1572	0.333	0.00666	1853	32	1859.08	40.8998	1866	40	0.327053	0.696677	0.696677	1866	40	Wang et al. (2016)
HL1-2.1	0.38	0.0636	0.0013356	1.128	0.0282	0.1287	0.0018018	780	10	766.772	16.1022	727	44	-1.72511	-7.29023	-1.72511	780	10	Wang et al. (2016)
HL1-3.1	0.48	0.0558	0.0035154	0.569	0.038123	0.0738	0.0017712	459	11	457.351	28.8131	446	140	-0.36048	-2.9148	-0.36048	459	11	Wang et al. (2016)
HL1-4.1	0.45	0.0617	0.0010489	0.905	0.019005	0.1065	0.0013845	652.3	8.2	654.373	11.1243	663	36	0.31677	1.61388	0.31677	652.3	8.2	Wang et al. (2016)
HL1-5.1	0.68	0.0549	0.0019764	0.401	0.015639	0.0531	0.0007965	333.2	4.9	342.361	12.325	408	80	2.67585	18.3333	2.67585	333.2	4.9	Wang et al. (2016)
HL1-6.1	0.18	0.0555	0.001998	0.534	0.02136	0.0699	0.0012582	435.3	7.6	434.445	15.64	432	80	-0.196723	-0.763889	-0.196723	435.3	7.6	Wang et al. (2016)
HL1-7.1	1.48	0.0503	0.0028671	0.499	0.029441	0.0719	0.0010785	447.8	6.6	411.011	23.4276	209	130	-8.95095	-114.258	-8.95095	447.8	6.6	Wang et al. (2016)
HL1-8.1	0.81	0.1677	0.00098943	11.37	0.26151	0.492	0.011316	2580	48	2553.88	15.0679	2534.3	9.9	-1.02291	-1.80326	-1.80326	2534.3	9.9	Wang et al. (2016)
HL1-9.1	0.31	0.1176	0.00089376	5.098	0.086666	0.3144	0.0050304	1762	24	1835.71	13.9514	1920	14	4.01521	8.22917	8.22917	1920	14	Wang et al. (2016)
HL1-10.1	0.15	0.0745	0.00067795	1.929	0.030864	0.1878	0.0024414	1109	14	1091.15	9.9295	1055	18	-1.63553	-5.11848	-5.11848	1055	18	Wang et al. (2016)
HL1-11.1	1.22	0.0499	0.003992	0.345	0.02829	0.0501	0.0008517	315	5.3	300.943	24.0754	191	190	-4.67107	-64.9215	-4.67107	315	5.3	Wang et al. (2016)
HL1-12.1	0.2	0.0554	0.0011634	0.543	0.014118	0.071	0.000994	442.4	6	440.385	9.24808	429	48	-0.457556	-3.12354	-0.457556	442.4	6	Wang et al. (2016)
HL1-13.1	0.48	0.0542	0.0023306	0.788	0.036248	0.1055	0.001688	646.6	9.7	590.016	25.3707	379	97	-9.59029	-70.6069	-9.59029	646.6	9.7	Wang et al. (2016)
HL1-14.1	0.18	0.0552	0.0017664	0.557	0.019495	0.0731	0.0010965	455	6.5	449.556	14.3858	422	71	-1.21099	-7.81991	-1.21099	455	6.5	Wang et al. (2016)
HL1-15.1	0.17	0.1136	0.0007952	5.355	0.08568	0.3418	0.0047852	1896	23	1877.62	13.1434	1858	13	-0.978782	-2.04521	-2.04521	1858	13	Wang et al. (2016)
HL1-16.1	0.41	0.0704	0.0011968	1.558	0.034276	0.1605	0.002247	959	13	953.64	16.2119	940	36	-0.56206	-2.02128	-0.56206	959	13	Wang et al. (2016)
HL1-18.1	1.11	0.0722	0.0023104	1.805	0.06498	0.1812	0.002718	1073	15	1047.23	33.5114	993	65	-2.46054	-8.05639	-8.05639	993	65	Wang et al. (2016)
HL1-19.1	0.23	0.054	0.001512	0.519	0.017127	0.0698	0.0012564	434.8	7.7	424.468	11.8851	369	63	-2.43409	-17.832	-2.43409	434.8	7.7	Wang et al. (2016)
HL1-21.1	1.02	0.0542	0.001626	0.538	0.01883	0.0719	0.0012223	447.7	7.4	437.089	13.1127	381	68	-2.42754	-17.5066	-2.42754	447.7	7.4	Wang et al. (2016)
HL1-1	0.64	0.0755	0.0045	0.7843	0.0426	0.0762	0.0012	473.1	7.3	587.9	24.3	1083.3	115.7	19.5271	56.3279	19.5271	-	-	Wang et al. (2016)
HL1-2	0.87	0.0651	0.0028	0.6125	0.0265	0.0678	0.0008	422.8	4.7	485.1	16.7	788.9	96.4	12.8427	46.4064	12.8427	-	-	Wang et al. (2016)
HL1-3	0.73	0.0518	0.0034	0.3981	0.0269	0.0552	0.0008	346.1	4.9	340.3	19.5	276	150	-1.70438	-25.3986	-1.70438	346.1	4.9	Wang et al. (2016)
HL1-4	0.2	0.0543	0.0027	0.5474	0.0271	0.0729	0.0011	453.3	6.8	443.3	17.8	387.1	113.9	-2.25581	-17.1015	-2.25581	453.3	6.8	Wang et al. (2016)
HL1-5	0.82	0.0673	0.0044	1.2753	0.0812	0.1382	0.0025	834.5	14.4	834.8	36.2	855.6	136	0.0359368	2.46611	0.0359368	834.5	14.4	Wang et al. (2016)
HL1-6	0.15	0.0567	0.0029	0.5804	0.0292	0.0742	0.001	461.6	5.8	464.7	18.7	479.7	114.8	0.667097	3.77319	0.667097	461.6	5.8	Wang et al. (2016)
HL1-7	0.43	0.0644	0.0037	0.649	0.0375	0.0728	0.0011	453.3	6.8	507.8	23.1	753.7	121.1	10.7326	39.8567	10.7326	-	-	Wang et al. (2016)
HL1-8	0.25	0.0592	0.0028	0.5694	0.0257	0.07	0.001	436.2	6.2	457.6	16.6	576	97.2	4.67657	24.2708	4.67657	436.2	6.2	Wang et al. (2016)
HL1-9	0.72	0.0609	0.0024	0.7874	0.0296	0.0935	0.001	576.5	5.9	589.7	16.8	635.2	83.3	2.23843	9.24118	2.23843	576.5	5.9	Wang et al. (2016)
HL1-10	1.11	0.0588	0.0028	0.6334	0.0295	0.0785	0.0011	487.3	6.7	498.2	18.3	561.1	105.5	2.18788	13.1527	2.18788	487.3	6.7	Wang et al. (2016)
HL1-11	0.66	0.086	0.0025	2.9319	0.0812	0.2471	0.0025	1423.3	13.1	1390.2	21	1338.9	56.9	-2.38095	-6.30368	-6.30368	1338.9	56.9	Wang et al. (2016)
HL1-12	1.14	0.0628	0.0046	0.4488	0.0311	0.0538	0.0011	337.9	6.6	376.4	21.8	701.9	155.5	10.2285	51.8592	10.2285	-	-	Wang et al. (2016)
HL1-13	0.56	0.0543	0.0032	0.5821	0.033	0.0784	0.0012	486.6	7.2	465.8	21.2	383.4	126.8	-4.46544	-26.9171	-4.46544	486.6	7.2	Wang et al. (2016)
HL1-14	0.64	0.0575	0.0039	0.5534	0.0386	0.07	0.0012	436	6.9	447.2	25.2	522.3	143.5	2.50447	16.5231	2.50447	436	6.9	Wang et al. (2016)
HL1-15	0.85	0.3072	0.0083	30.2601	0.8358	0.7112	0.0081	3462.9	30.6	3495.3	27.2	3507.1	42.7	0.926959	1.2603	1.2603	3507.1	42.7	Wang et al. (2016)
HL1-16	1.13	0.0807	0.0037	0.6826	0.03	0.0616	0.0008	385.4	5.1	528.4	18.1	1214.5	91.5	27.0628	68.2668	27.0628	-	-	Wang et al. (2016)
HL1-17	0.54	0.0781	0.0026	2.6041	0.087	0.2409	0.0028	1391.4	14.6	1301.8	24.5	1150	67.1	-6.88278	-20.9913	-20.9913	-	-	Wang et al. (2016)
HL1-18	0.42	0.0619	0.0036	0.6013	0.0344	0.0706	0.0014	440	8.2	478.1	21.8	672.2	125.9	7.96904	34.5433	7.96904	440	8.2	Wang et al. (2016)
HL1-19	0.4	0.0722	0.0039	1.7559	0.0931	0.1762	0.0033	1046.1	17.8	1029.3	34.3	990.7	109.3	-1.63218	-5.59201	-5.59201	990.7	109.3	Wang et al. (2016)
HL1-20	0.33	0.053	0.0023	0.5457	0.0235	0.0741	0.001	460.8	5.7	442.2	15.5	327.8	100	-4.20624	-40.5735	-4.20624	460.8	5.7	Wang et al. (2016)
HL1-21	0.89	0.0581	0.0037	0.6399	0.0394	0.0801	0.0015	496.5	9	502.2	24.4	531.5	138.9	1.13501	6.58514	1.13501	496.5	9	Wang et al. (2016)
HL1-22	0.3	0.0545	0.0032	0.5811	0.0352	0.0768	0.0013	477.2	7.9	465.2	22.6	394.5	133.3	-2.57954	-20.9632	-2.57954	477.2	7.9	Wang et al. (2016)
HL1-23	1.19	0.054	0.004	0.3873	0.0278	0.0526	0.001	330.7	5.9	332.4	20.3	372.3	168.5	0.511432	11.1738	0.511432	330.7	5.9	Wang et al. (2016)
HL1-24	0.58	0.0546	0.0024	0.5574	0.0242	0.0734	0.0009	456.7	5.5	449.8	15.8	394.5	100	-1.53402	-15.7668	-1.53402	456.7	5.5	Wang et al. (2016)
HL1-25	0.71	0.0661	0.003	1.6242	0.0767	0.1759	0.0022	1044.5	11.9	979.6	29.7	810.8	89.8	-6.62515	-28.8234	-28.8234	-	-	Wang et al. (2016)
HL1-26	0.4	0.1404	0.006	7.7882	0.3491	0.399	0.0047	2164.5	21.6	2206.8	40.4	2231.8	69.4	1.9168	3.0155	3.0155	2231.8	69.4	Wang et al. (2016)
HL1-27	0.29	0.0692	0.0036	1.9504	0.1057	0.2029	0.002	1191.1	10.8	1098.6	36.4	905.6	107.4	-8.41981	-31.5261	-31.5261	-	-	Wang et al. (2016)
HL1-28	0.72	0.0518	0.0034	0.478	0.0326	0.0669	0.0008	417.7	4.8	396.7	22.4	276	150	-5.29367	-51.3406	-5.29367	417.7	4.8	Wang et al. (2016)
HL1-29	0.75	0.053	0.004	0.511	0.0391	0.0703	0.0012	438.2	6.9	419.1	26.3	327.8	175	-4.55738	-33.6791	-4.55738	438.2	6.9	Wang et al. (2016)
HL1-30	0.34	0.2432	0.0118	21.3606	1.0995	0.6337	0.0069	3164.2	27.1	3155.1	50	3142.6	77.5	-0.288422	-0.687329	-0.687329	3142.6	77.5	Wang et al. (2016)
HL1-31	0.86	0.1516	0.0062	9.9995	0.4305	0.4754	0.0048	2507.3	20.9	2434.7	39.8	2364.8	70.4	-2.98189	-6.02588	-6.02588	2364.8	70.4	Wang et al. (2016)
HL1-32	1.12	0.0802	0.005	1.023	0.0632	0.0931	0.0016	573.7	9.7	715.4	31.7	1266.7	123.3	19.8071	54.7091	19.8071	-	-	Wang et al. (2016)
HL1-33	0.43	0.0567	0.0037	0.5689	0.0339	0.0737	0.0013	458.5	7.6	457.3	22	479.7	142.6	-0.26241	4.41943	-0.26241	458.5	7.6	Wang et al. (2016)
HL1-34	0.8	0.1835	0.0068	12.9934	0.4958	0.5082	0.0067	2649.1	28.7	2679.2	36	2684.3	61.1	1.12347	1.31133	1.31133	2684.3	61.1	Wang et al. (2016)
HL1-35	1.24	0.0555	0.003	0.5782	0.0315	0.0749	0.001	465.7	6	463.3	20.3	431.5	122.2	-0.518023	-7.92584	-0.518023	465.7	6	Wang et al. (2016)
HL1-36	0.97	0.1578	0.0043	10.2176	0.2771	0.4647	0.0047	2460.4	20.5	2454.7	25.1	2433	46.3	-0.232208	-1.12618	-1.12618	2433	46.3	Wang et al. (2016)
HL1-37	0.64	0.1114	0.0033	5.0013	0.1415	0.3235	0.0035	1807	17	1819.5	23.9	1821.9	53.7	0.687002	0.817828	0.817828	1821.9	53.7	Wang et al. (2016)
HL1-38	0.83	0.0513	0.0033	0.5284	0.0326	0.0748	0.001	464.8	6.2	430.7	21.7	253.8	148.1	-7.91734	-83.1363	-7.91734	464.8	6.2	Wang et al. (2016)
HL1-39	1.22	0.0644	0.0054	0.4853	0.0379	0.0558	0.0011	350.1	6.5	401.7	25.9	753.7	178.5	12.8454	53.5492	12.8454	-	-	Wang et al. (2016)
HL2-1-1.1	1.25	0.0472	0.005664	0.442	0.05304	0.068	0.001632	424.2	9.7	371.649	44.5978	58	280	-14.1401	-631.379	-14.1401	-	-	Wang et al. (2016)
HL2-1-3.1	0.6	0.0695	0.0018765	1.752	0.063072	0.1827	0.0043848	1082	24	1027.86	27.7523	915	55	-5.26684	-18.2514	-18.2514	-	-	Wang et al. (2016)
HL2-1-4.1	0.62	0.1172	0.00113684	5.63	0.13512	0.3483	0.0073143	1926	36	1920.64	18.6302	1914	17	-0.279324	-0.626959	-0.626959	1914	17	Wang et al. (2016)
HL2-1-5.1	0.54	0.0491	0.0028969	0.473	0.030272	0.0698	0.0016054	435.2	9.6	393.245	23.2015	153	140	-10.6689	-184.444	-10.6689	-	-	Wang et al. (2016)
HL2-1-6.1	1.07	0.0539	0.0023716	0.528	0.026928	0.0712	0.0017088	443	10	430.466	18.9405	365	100	-2.91168	-21.3699	-2.91168	443	10	Wang et al. (2016)
HL2-1-8.1	0.78	0.1052	0.0027352	4.89	0.17604	0.3373	0.0084325	1873	41	1800.47	46.8122	1718	48	-4.02839	-9.02212	-9.02212	1718	48	Wang et al. (2016)
HL2-1-9.1	0.45	0.102	0.001734	3.415	0.092205	0.2428	0.0050988	1401	26	1507.8	25.6326	1661	31	7.08306	15.6532	15.6532	-	-	Wang et al. (2016)
HL2-1-10.1	1.1	0.0807	0.0025824	2.532	0.098748	0.2277	0.0052371	1322	27	1281.23	40.9994	1213	64	-3.18209	-8.98599	-8.98599	1213	64	Wang et al. (2016)
HL2-1-12.1	0.52	0.0785	0.001884	2.177	0.069664	0.2012	0.0042252	1182	22	1173.68	28.1683	1159	48	-0.709097	-1.98447	-1.98447	1159	48	Wang et al. (2016)
HL2-1-12.2	0.33	0.0813	0.0009756	2.165	0.049795	0.1932	0.003864	1139	20	1169.84	14.038	1228	24	2.63585	7.24756	7.24756	1228	24	Wang et al. (2016)
HL2-1-13.1	0.67	0.0551	0.0013224	0.547	0.017504	0.0719	0.001438	447.8	8.7	443.014	10.6323	417	54	-1.08039	-7.38609	-1.08039	447.8	8.7	Wang et al. (2016)
HL2-1-14.1	0.71	0.06	0.0024	0.589	0.026505	0.0712	0.0015664	443.3	9.3	470.212	18.8085	603	86	5.7234	26.4842	5.7234	443.3	9.3	Wang et al. (2016)
HL2-1-15.1	1.19	0.0549	0.0014274	0.541	0.017853	0.0715	0.0015015	445.3	8.8	439.068	11.4158	407	57	-1.41935	-9.41032	-1.41935	445.3	8.8	Wang et al. (2016)
HL2-1-16.1	0.8	0.0525	0.00168	0.507	0.019266	0.0701	0.0015422	437	9.2	416.415	13.3253	306	72	-4.94338	-42.8105	-4.94338	437	9.2	Wang et al. (2016)
HL2-1-17.1	0.67	0.0538	0.0020982	0.523	0.023535	0.0705	0.001551	439	9.2	427.138	16.6584	364	89	-2.77702	-20.6044	-2.77702	439	9.2	Wang et al. (2016)
HL2-1-18.1	0.55	0.0561	0.0009537	0.552	0.014352	0.0714	0.001428	444.5	8.6	446.29	7.58693	456	37	0.401106	2.52193	0.401106	444.5	8.6	Wang et al. (2016)
HL2-1-19.1	0.84	0.0517	0.0019129	0.506	0.021252	0.071	0.00142	442.3	8.6	415.741	15.3824	271	85	-6.38834	-63.2103	-6.38834	442.3	8.6	Wang et al. (2016)
HL2-1-20.1	0.45	0.1779	0.0023127	13.06	0.35262	0.532	0.012236	2752	51	2683.9	34.8907	2634	22	-2.53731	-4.47988	-4.47988	2634	22	Wang et al. (2016)
HL2-1-20.2	0.57	0.1588	0.00093692	9.96	0.20916	0.4549	0.009098	2417	41	2431	14.3429	2443	10	0.575764	1.06427	1.06427	2443	10	Wang et al. (2016)
HL2-1-21.1	0.56	0.0572	0.0022308	0.557	0.025065	0.0706	0.0014826	439.5	9.1	449.556	17.5327	500	87	2.23686	12.1	2.23686	439.5	9.1	Wang et al. (2016)
HL2-1-22.1	0.84	0.1178	0.0014136	5.86	0.1465	0.3608	0.0079376	1986	38	1955.26	23.4631	1923	21	-1.57211	-3.27613	-3.27613	1923	21	Wang et al. (2016)
HL2-1-23.1	0.71	0.1141	0.0037653	5.81	0.24983	0.37	0.00999	2028	48	1947.83	64.2785	1865	59	-4.11567	-8.73995	-8.73995	1865	59	Wang et al. (2016)
HL2-1-24.1	0.46	0.0527	0.0033201	0.538	0.036046	0.0741	0.0016302	460.8	9.7	437.089	27.5366	316	140	-5.42464	-45.8228	-5.42464	460.8	9.7	Wang et al. (2016)
HL2-1-25.1	0.82	0.055	0.001595	0.548	0.019728	0.0722	0.001444	449.4	8.8	443.67	12.8664	414	65	-1.29154	-8.55072	-1.29154	449.4	8.8	Wang et al. (2016)
HL2-1-26.1	0.82	0.0528	0.0016368	0.547	0.020239	0.0751	0.0015771	466.8	9.4	443.014	13.7334	322	69	-5.3692	-44.9689	-5.3692	466.8	9.4	Wang et al. (2016)
HL2-1-27.1	0.72	0.0493	0.0038454	0.477	0.039114	0.0701	0.0016824	436	10	395.999	30.8879	164	180	-10.1014	-165.854	-10.1014	-	-	Wang et al. (2016)
HL2-1-28.1	0.81	0.0568	0.001704	0.569	0.021053	0.0726	0.0015972	452	9.4	457.351	13.7205	484	66	1.17007	6.61157	1.17007	452	9.4	Wang et al. (2016)
HL2-1-29.1	0.55	0.0755	0.001359	1.812	0.050736	0.174	0.003828	1034	21	1049.76	18.8957	1083	36	1.50159	4.52447	4.52447	1083	36	Wang et al. (2016)
HL2-1-30.1	0.39	0.0583	0.001749	0.584	0.021024	0.0727	0.0015267	452.5	9	467.012	14.0104	539	65	3.10745	16.0482	3.10745	452.5	9	Wang et al. (2016)
HL2-1-30.2	0.68	0.0583	0.0032065	0.597	0.036417	0.0743	0.0017832	462	11	475.311	26.1421	540	120	2.80052	14.4444	2.80052	462	11	Wang et al. (2016)
HL2-1-31.1	0.85	0.0557	0.0021723	0.553	0.024885	0.0721	0.0015862	448.6	9.6	446.944	17.4308	439	86	-0.370493	-2.18679	-0.370493	448.6	9.6	Wang et al. (2016)
HL2-1-32.1	0.79	0.0563	0.0016327	0.557	0.019495	0.0718	0.001436	446.8	8.8	449.556	13.0371	463	64	0.613034	3.49892	0.613034	446.8	8.8	Wang et al. (2016)
HL2-1-33.1	0.8	0.0556	0.00417	0.555	0.043845	0.0723	0.0018075	450	11	448.251	33.6188	438	170	-0.390215	-2.73973	-0.390215	450	11	Wang et al. (2016)
HL2-1-35.1	0.54	0.0505	0.0025755	0.507	0.027885	0.0727	0.0015994	452.5	9.5	416.415	21.2372	220	120	-8.66563	-105.682	-8.66563	452.5	9.5	Wang et al. (2016)
HL2-1-36.1	0.16	0.0715	0.00062205	1.671	0.035091	0.1696	0.003392	1010	18	997.531	8.67852	970	18	-1.25003	-4.12371	-4.12371	970	18	Wang et al. (2016)
HL2-1-3.1	0.6	0.0695	0.0018765	1.752	0.063072	0.1827	0.0043848	1082	24	1027.86	27.7523	915	55	-5.26684	-18.2514	-18.2514	-	-	Wang et al. (2016)
HL2-1-4.1	0.62	0.1172	0.00113684	5.63	0.13512	0.3483	0.0073143	1926	36	1920.64	18.6302	1914	17	-0.279324	-0.626959	-0.626959	1914	17	Wang et al. (2016)
HL2-1-5.1	0.54	0.0491	0.0028969	0.473	0.030272	0.0698	0.0016054	435.2	9.6	393.245	23.2015	153	140	-10.6689	-184.444	-10.6689	-	-	Wang et al. (2016)
HL2-1-6.1	1.07	0.0539	0.0023716	0.528	0.026928	0.0712	0.0017088	443	10	430.466	18.9405	365	100	-2.91168	-21.3699	-2.91168	443	10	Wang et al. (2016)
HL2-1-8.1	0.78	0.1052	0.0027352	4.89	0.17604	0.3373	0.0084325	1873	41	1800.47	46.8122	1718	48	-4.02839	-9.02212	-9.02212	1718	48	Wang et al. (2016)
HL2-1-9.1	0.45	0.102	0.001734	3.415	0.092205	0.2428	0.0050988	1401	26	1507.8	25.6326	1661	31	7.08306	15.6532	15.6532	-	-	Wang et al. (2016)
HL2-1-10.1	1.1	0.0807	0.0025824	2.532	0.098748	0.2277	0.0052371	1322	27	1281.23	40.9994	1213	64	-3.18209	-8.98599	-8.98599	1213	64	Wang et al. (2016)
HL2-1-12.1	0.52	0.0785	0.001884	2.177	0.069664	0.2012	0.0042252	1182	22	1173.68	28.1683	1159	48	-0.709097	-1.98447	-1.98447	1159	48	Wang et al. (2016)
HL2-1-12.2	0.33	0.0813	0.0009756	2.165	0.049795	0.1932	0.003864	1139	20	1169.84	14.038	1228	24	2.63585	7.24756	7.24756	1228	24	Wang et al. (2016)
HL2-1-13.1	0.67	0.0551	0.0013224	0.547	0.017504	0.0719	0.001438	447.8	8.7	443.014	10.6323	417	54	-1.08039	-7.38609	-1.08039	447.8	8.7	Wang et al. (2016)
HL2-1-14.1	0.71	0.06	0.0024	0.589	0.026505	0.0712	0.0015664	443.3	9.3	470.212	18.8085	603	86	5.7234	26.4842	5.7234	443.3	9.3	Wang et al. (2016)
HL2-1-15.1	1.19	0.0549	0.0014274	0.541	0.017853	0.0715	0.0015015	445.3	8.8	439.068	11.4158	407	57	-1.41935	-9.41032	-1.41935	445.3	8.8	Wang et al. (2016)
HL2-1-16.1	0.8	0.0525	0.00168	0.507	0.019266	0.0701	0.0015422	437	9.2	416.415	13.3253	306	72	-4.94338	-42.8105	-4.94338	437	9.2	Wang et al. (2016)
HL2-1-17.1	0.67	0.0538	0.0020982	0.523	0.023535	0.0705	0.001551	439	9.2	427.138	16.6584	364	89	-2.77702	-20.6044	-2.77702	439	9.2	Wang et al. (2016)
HL2-1-18.1	0.55	0.0561	0.0009537	0.552	0.014352	0.0714	0.001428	444.5	8.6	446.29	7.58693	456	37	0.401106	2.52193	0.401106	444.5	8.6	Wang et al. (2016)
HL2-1-19.1	0.84	0.0517	0.0019129	0.506	0.021252	0.071	0.00142	442.3	8.6	415.741	15.3824	271	85	-6.38834	-63.2103	-6.38834	442.3	8.6	Wang et al. (2016)
HL2-1-20.1	0.45	0.1779	0.0023127	13.06	0.35262	0.532	0.012236	2752	51	2683.9	34.8907	2634	22	-2.53731	-4.47988	-4.47988	2634	22	Wang et al. (2016)
HL2-1-20.2	0.57	0.1588	0.00093692	9.96	0.20916	0.4549	0.009098	2417	41	2431	14.3429	2443	10	0.575764	1.06427	1.06427	2443	10	Wang et al. (2016)
HL2-1-21.1	0.56	0.0572	0.0022308	0.557	0.025065	0.0706	0.0014826	439.5	9.1	449.556	17.5327	500	87	2.23686	12.1	2.23686	439.5	9.1	Wang et al. (2016)
HL2-1-22.1	0.84	0.1178	0.0014136	5.86	0.1465	0.3608	0.0079376	1986	38	1955.26	23.4631	1923	21	-1.57211	-3.27613	-3.27613	1923	21	Wang et al. (2016)
HL2-1-23.1	0.71	0.1141	0.0037653	5.81	0.24983	0.37	0.00999	2028	48	1947.83	64.2785	1865	59	-4.11567	-8.73995	-8.73995	1865	59	Wang et al. (2016)
HL2-1-24.1	0.46	0.0527	0.0033201	0.538	0.036046	0.0741	0.0016302	460.8	9.7	437.089	27.5366	316	140	-5.42464	-45.8228	-5.42464	460.8	9.7	Wang et al. (2016)
HL2-1-25.1	0.82	0.055	0.001595	0.548	0.019728	0.0722	0.001444	449.4	8.8	443.67	12.8664	414	65	-1.29154	-8.55072	-1.29154	449.4	8.8	Wang et al. (2016)
HL2-1-26.1	0.82	0.0528	0.0016368	0.547	0.020239	0.0751	0.0015771	466.8	9.4	443.014	13.7334	322	69	-5.3692	-44.9689	-5.3692	466.8	9.4	Wang et al. (2016)
HL2-1-27.1	0.72	0.0493	0.0038454	0.477	0.039114	0.0701	0.0016824	436	10	395.999	30.8879	164	180	-10.1014	-165.854	-10.1014	-	-	Wang et al. (2016)
HL2-1-28.1	0.81	0.0568	0.001704	0.569	0.021053	0.0726	0.0015972	452	9.4	457.351	13.7205	484	66	1.17007	6.61157	1.17007	452	9.4	Wang et al. (2016)
HL2-1-29.1	0.55	0.0755	0.001359	1.812	0.050736	0.174	0.003828	1034	21	1049.76	18.8957	1083	36	1.50159	4.52447	4.52447	1083	36	Wang et al. (2016)
HL2-1-30.1	0.39	0.0583	0.001749	0.584	0.021024	0.0727	0.0015267	452.5	9	467.012	14.0104	539	65	3.10745	16.0482	3.10745	452.5	9	Wang et al. (2016)
HL2-1-30.2	0.68	0.0583	0.0032065	0.597	0.036417	0.0743	0.0017832	462	11	475.311	26.1421	540	120	2.80052	14.4444	2.80052	462	11	Wang et al. (2016)
HL2-1-31.1	0.85	0.0557	0.0021723	0.553	0.024885	0.0721	0.0015862	448.6	9.6	446.944	17.4308	439	86	-0.370493	-2.18679	-0.370493	448.6	9.6	Wang et al. (2016)
HL2-1-32.1	0.79	0.0563	0.0016327	0.557	0.019495	0.0718	0.001436	446.8	8.8	449.556	13.0371	463	64	0.613034	3.49892	0.613034	446.8	8.8	Wang et al. (2016)
HL2-1-33.1	0.8	0.0556	0.00417	0.555	0.043845	0.0723	0.0018075	450	11	448.251	33.6188	438	170	-0.390215	-2.73973	-0.390215	450	11	Wang et al. (2016)
HL2-1-35.1	0.54	0.0505	0.0025755	0.507	0.027885	0.0727	0.0015994	452.5	9.5	416.415	21.2372	220	120	-8.66563	-105.682	-8.66563	452.5	9.5	Wang et al. (2016)
HL2-1-36.1	0.16	0.0715	0.00062205	1.671	0.035091	0.1696	0.003392	1010	18	997.531	8.67852	970	18	-1.25003	-4.12371	-4.12371	970	18	Wang et al. (2016)
HL2-1-37.1	0.49	0.0921	0.0010131	3.375	0.077625	0.2657	0.0055797	1519	28	1498.56	16.4841	1470	21	-1.36416	-3.33333	-3.33333	1470	21	Wang et al. (2016)
HL2-1-38.1	1.23	0.1562	0.00129646	10.39	0.23897	0.482	0.010604	2538	45	2470.07	20.5016	2415	14	-2.75009	-5.09317	-5.09317	2415	14	Wang et al. (2016)
HL2-1-39.1	0.88	0.1095	0.0012045	4.84	0.11616	0.3205	0.0067305	1792	33	1791.81	19.71	1792	19	-0.0103768	0	0	1792	19	Wang et al. (2016)
HL2-1-40.1	1.46	0.069	0.001311	1.601	0.044828	0.1684	0.0035364	1003	19	970.566	18.4408	897	40	-3.34175	-11.8172	-11.8172	-	-	Wang et al. (2016)
HL2-1-41.1	1.65	0.0549	0.0034587	0.64	0.04224	0.0845	0.0014365	522.8	8.3	502.288	31.6442	410	140	-4.08364	-27.5122	-4.08364	522.8	8.3	Wang et al. (2016)
HL2-1-41.2	1.83	0.0581	0.0024983	0.649	0.029854	0.0811	0.0012165	502.5	7.2	507.845	21.8373	533	95	1.05251	5.72233	1.05251	502.5	7.2	Wang et al. (2016)
HL2-1-42.1	0.23	0.0852	0.0011928	1.594	0.03188	0.1357	0.0018998	820	11	967.83	13.5496	1321	28	15.2744	37.9258	15.2744	-	-	Wang et al. (2016)
HL2-1-43.1	0.65	0.0559	0.0020683	0.539	0.022099	0.0699	0.0012582	435.7	7.4	437.749	16.1967	450	82	0.468176	3.17778	0.468176	435.7	7.4	Wang et al. (2016)
HL2-1-44.1	1.6	0.0742	0.005565	2.12	0.16536	0.207	0.004761	1213	25	1155.3	86.6471	1047	150	-4.9948	-15.8548	-15.8548	-	-	Wang et al. (2016)
HL2-1-45.1	0.57	0.0589	0.001767	0.565	0.018645	0.0696	0.001044	434	6.3	454.76	13.6428	562	65	4.56494	22.7758	4.56494	434	6.3	Wang et al. (2016)
HL2-1-46.1	0.82	0.1079	0.0019422	4.76	0.119	0.3202	0.0057636	1791	28	1777.81	32.0006	1763	32	-0.741977	-1.5882	-1.5882	1763	32	Wang et al. (2016)
HL2-1-47.1	0.44	0.0783	0.0013311	1.7	0.1581	0.157	0.014444	942	81	1008.5	17.1444	1154	34	6.5935	18.3709	6.5935	942	81	Wang et al. (2016)
HL2-1-48.1	0.78	0.0565	0.0024295	0.55	0.0253	0.0706	0.001059	439.7	6.3	444.981	19.1342	473	96	1.18675	7.04017	1.18675	439.7	6.3	Wang et al. (2016)
HL2-1-49.1	0.86	0.0556	0.0012232	0.519	0.012975	0.0677	0.0008801	422.2	5.4	424.468	9.3383	436	48	0.53433	3.16514	0.53433	422.2	5.4	Wang et al. (2016)
HL2-1-49.2	0.91	0.0498	0.0020916	0.49	0.02156	0.0713	0.0010695	444	6.3	404.896	17.0056	187	98	-9.65775	-137.433	-9.65775	444	6.3	Wang et al. (2016)
HL2-1-50.1	0.32	0.0534	0.0019758	0.523	0.020397	0.071	0.001065	442.2	6.3	427.138	15.8041	345	83	-3.5262	-28.1739	-3.5262	442.2	6.3	Wang et al. (2016)
HL2-1-51.1	0.12	0.0647	0.0012293	1.085	0.027125	0.1216	0.0020672	740	12	746.045	14.1749	764	39	0.810317	3.14136	0.810317	740	12	Wang et al. (2016)
HL2-1-52.1	0.66	0.0502	0.00753	0.495	0.07425	0.0715	0.0013585	445.5	8.3	408.298	61.2446	203	340	-9.11158	-119.458	-9.11158	445.5	8.3	Wang et al. (2016)
HL2-1-53.1	0.99	0.0561	0.0013464	0.541	0.015148	0.07	0.00098	436.2	6	439.068	10.5376	456	54	0.653218	4.34211	0.653218	436.2	6	Wang et al. (2016)
HL2-1-54.1	0.69	0.1146	0.0021774	5.6	0.1456	0.3544	0.0060248	1956	28	1916.03	36.4046	1874	35	-2.08606	-4.37567	-4.37567	1874	35	Wang et al. (2016)
HL2-1-55.1	1.68	0.0695	0.001251	1.459	0.033557	0.1522	0.002283	913	13	913.563	16.4441	914	37	0.0616566	0.109409	0.0616566	913	13	Wang et al. (2016)
HL2-1-56.1	0.8	0.1066	0.001599	4.71	0.10833	0.3205	0.0054485	1792	27	1768.96	26.5344	1741	28	-1.30264	-2.92935	-2.92935	1741	28	Wang et al. (2016)
HL2-1-57.1	0.87	0.078	0.00117	2.125	0.04675	0.1976	0.002964	1163	16	1156.92	17.3538	1147	31	-0.525434	-1.39494	-1.39494	1147	31	Wang et al. (2016)
HL2-1-59.1	0.66	0.0563	0.0012949	0.541	0.015148	0.0696	0.001044	434	6.4	439.068	10.0986	464	51	1.15428	6.46552	1.15428	434	6.4	Wang et al. (2016)
HL2-1-60.1	0.45	0.0703	0.0022496	1.652	0.05782	0.1705	0.002387	1015	13	990.282	31.689	937	65	-2.49604	-8.32444	-8.32444	937	65	Wang et al. (2016)
HL2-1-61.1	0.49	0.0769	0.000769	1.972	0.033524	0.186	0.002604	1100	14	1105.95	11.0595	1118	20	0.538142	1.61002	1.61002	1118	20	Wang et al. (2016)
HL2-1-62.1	0.87	0.1388	0.00101324	5.04	0.10584	0.2635	0.0050065	1508	26	1826	13.3298	2213	13	17.4153	31.8572	31.8572	-	-	Wang et al. (2016)
HL2-1-62.2	0.21	0.0584	0.0019272	0.735	0.02646	0.0913	0.0013695	563	7.9	559.464	18.4623	544	73	-0.632086	-3.49265	-0.632086	563	7.9	Wang et al. (2016)
Site 17: Qinyuan, Changzhi
Sample	Th/U	207Pb/206Pb	Error	207Pb/235U	Error	206Pb/238U	Error	238U-206Pb date	Error	235U-207Pb date	Error	207Pb-206Pb date	Error	Discordance 1 (238U–206Pb vs 235U–207Pb)	Discordance 2 (238U–206Pb vs 207Pb–206Pb)	Discordance	Preferred Age	Error	Data source
Name			1σ		1σ		1σ	(Ma)	1σ	(Ma)	1σ	(Ma)	1σ	(%)	(%)	(%)	(Ma)	1σ
SWT-1.1	0.54	0.057	0.002964	0.546	0.029484	0.0695	0.0010425	433.3	6.4	442.357	23.0026	490	120	2.04748	11.5714	2.04748	433.3	6.4	Wang et al. (2016)
SWT-2.1	0.66	0.1513	0.00133144	9.34	0.16812	0.4479	0.0071664	2386	31	2371.87	20.8725	2361	15	-0.595703	-1.05887	-1.05887	2361	15	Wang et al. (2016)
SWT-3.1	0.67	0.0537	0.0028461	0.524	0.02882	0.0707	0.0011312	440.5	6.7	427.805	22.6737	359	120	-2.96754	-22.7019	-2.96754	440.5	6.7	Wang et al. (2016)
SWT-5.1	0.47	0.0545	0.0020165	0.537	0.020943	0.0714	0.0009996	444.8	6.2	436.429	16.1479	392	82	-1.91805	-13.4694	-1.91805	444.8	6.2	Wang et al. (2016)
SWT-6.1	0.58	0.1182	0.0013002	5.81	0.11039	0.3564	0.0057024	1965	27	1947.83	21.4262	1930	20	-0.881306	-1.81347	-1.81347	1930	20	Wang et al. (2016)
SWT-8.1	0.57	0.0535	0.001177	0.518	0.013468	0.0702	0.0009828	437.4	6	423.799	9.32359	352	50	-3.20921	-24.2614	-3.20921	437.4	6	Wang et al. (2016)
SWT-9.1	0.77	0.0531	0.0014337	0.536	0.016616	0.0732	0.001098	455.6	6.5	435.768	11.7657	332	61	-4.55098	-37.2289	-4.55098	455.6	6.5	Wang et al. (2016)
SWT-10.1	0.71	0.0608	0.002736	0.593	0.028464	0.0708	0.0012036	441.1	7.2	472.765	21.2744	631	97	6.69781	30.0951	6.69781	441.1	7.2	Wang et al. (2016)
SWT-11.1	0.23	0.0564	0.0009588	0.567	0.012474	0.0729	0.0010206	453.7	6.2	456.056	7.75296	470	38	0.516659	3.46809	0.516659	453.7	6.2	Wang et al. (2016)
SWT-12.1	0.3	0.1187	0.0014244	6.1	0.1159	0.3729	0.0052206	2043	25	1990.18	23.8821	1937	21	-2.65422	-5.47238	-5.47238	1937	21	Wang et al. (2016)
SWT-13.1	1.09	0.0561	0.0019074	0.548	0.020276	0.0709	0.0010635	441.5	6.4	443.67	15.0848	457	75	0.489067	3.39168	0.489067	441.5	6.4	Wang et al. (2016)
SWT-14.1	0.63	0.054	0.001458	0.529	0.016399	0.071	0.000994	442.2	6	431.13	11.6405	371	62	-2.56756	-19.1914	-2.56756	442.2	6	Wang et al. (2016)
SWT-15.1	0.91	0.0547	0.001641	0.519	0.019203	0.0688	0.0015136	428.8	9.1	424.468	12.734	400	67	-1.02056	-7.2	-1.02056	428.8	9.1	Wang et al. (2016)
SWT-16.1	0.99	0.0535	0.0024075	0.393	0.018471	0.0533	0.0007995	334.5	5	336.547	15.1446	348	100	0.608117	3.87931	0.608117	334.5	5	Wang et al. (2016)
SWT-17.1	0.63	0.0694	0.00067318	1.415	0.024055	0.1479	0.0020706	889	11	895.231	8.68374	911	20	0.695988	2.41493	0.695988	889	11	Wang et al. (2016)
SWT-19.1	0.59	0.055	0.00121	0.552	0.014352	0.0728	0.0010192	453	6	446.29	9.81838	413	48	-1.50348	-9.68523	-1.50348	453	6	Wang et al. (2016)
SWT-19.2	0.74	0.0478	0.0042542	0.471	0.04239	0.0715	0.0012155	445	7.1	391.865	34.876	88	210	-13.5594	-405.682	-13.5594	-	-	Wang et al. (2016)
SWT-20.1	0.76	0.0719	0.0007909	1.578	0.026826	0.1592	0.0020696	952	11	961.548	10.577	983	23	0.992951	3.15361	0.992951	952	11	Wang et al. (2016)
SWT-21.1	0.9	0.0517	0.0018095	0.498	0.019422	0.0698	0.0011168	435.1	6.7	410.333	14.3617	272	80	-6.03581	-59.9632	-6.03581	435.1	6.7	Wang et al. (2016)
SWT-22.1	0.45	0.0722	0.00071478	1.687	0.028679	0.1695	0.0022035	1009	12	1003.59	9.93559	991	20	-0.538598	-1.81635	-1.81635	991	20	Wang et al. (2016)
SWT-23.1	0.58	0.1184	0.0007104	3.986	0.05979	0.2441	0.0034174	1408	17	1631.29	9.78775	1933	11	13.688	27.1599	27.1599	-	-	Wang et al. (2016)
SWT-24.1	0.85	0.154	0.0012012	3.74	0.08602	0.1762	0.0038764	1046	21	1579.92	12.3234	2391	13	33.794	56.2526	56.2526	-	-	Wang et al. (2016)
SWT-25.1	0.52	0.0554	0.001939	0.533	0.020254	0.0698	0.001047	434.7	6.1	433.783	15.1824	429	78	-0.211342	-1.32867	-0.211342	434.7	6.1	Wang et al. (2016)
SWT-26.1	0.26	0.0698	0.001745	1.521	0.047151	0.1581	0.0028458	946	16	938.846	23.4712	922	51	-0.761966	-2.60304	-0.761966	946	16	Wang et al. (2016)
SWT-27.1	0.93	0.1179	0.00093141	5.708	0.091328	0.3513	0.0049182	1941	24	1932.51	15.2668	1924	14	-0.439286	-0.883576	-0.883576	1924	14	Wang et al. (2016)
SWT-28.1	0.68	0.0697	0.0008364	1.403	0.025254	0.146	0.002044	879	12	890.173	10.6821	919	25	1.25514	4.35256	1.25514	879	12	Wang et al. (2016)
SWT-29.1	0.67	0.0528	0.0011616	0.518	0.013468	0.0712	0.0009968	443.1	5.8	423.799	9.32359	320	50	-4.55418	-38.4688	-4.55418	443.1	5.8	Wang et al. (2016)
SWT-30.1	1.13	0.0498	0.0027888	0.464	0.026912	0.0676	0.001014	421.6	6	387.022	21.6732	188	130	-8.9343	-124.255	-8.9343	421.6	6	Wang et al. (2016)
SWT-31.1	0.85	0.0535	0.0017655	0.54	0.01944	0.0732	0.0011712	455.4	6.8	438.409	14.4675	350	74	-3.87561	-30.1143	-3.87561	455.4	6.8	Wang et al. (2016)
SWT-32.1	0.3	0.0691	0.0012438	1.53	0.03672	0.1607	0.0024105	960	13	942.465	16.9644	900	38	-1.86058	-6.66667	-1.86058	960	13	Wang et al. (2016)
SWT-33.1	0.86	0.0564	0.00282	0.543	0.028779	0.0698	0.0011866	434.9	7.1	440.385	22.0192	468	110	1.2455	7.07265	1.2455	434.9	7.1	Wang et al. (2016)
SWT-34.1	0.64	0.1759	0.00065083	12.03	0.16842	0.4958	0.0064454	2596	29	2606.65	9.64462	2615	6.1	0.408722	0.726577	0.726577	2615	6.1	Wang et al. (2016)
SWT-35.1	0.97	0.159	0.002226	10.26	0.24624	0.4682	0.009364	2476	40	2458.42	34.4178	2445	24	-0.715275	-1.26789	-1.26789	2445	24	Wang et al. (2016)
SWT-36.1	0.74	0.1599	0.00108732	6.62	0.10592	0.3001	0.0042014	1692	21	2061.94	14.0212	2454	11	17.9415	31.0513	31.0513	-	-	Wang et al. (2016)
SWT-37.1	1.05	0.0556	0.002502	0.589	0.028272	0.0768	0.0013056	476.9	7.6	470.212	21.1595	438	100	-1.42231	-8.88128	-1.42231	476.9	7.6	Wang et al. (2016)
SWT-38.1	0.66	0.0498	0.0041334	0.476	0.04046	0.0693	0.0011088	431.9	6.9	395.311	32.8108	185	190	-9.25579	-133.459	-9.25579	431.9	6.9	Wang et al. (2016)
SWT-39.1	0.89	0.0549	0.0007686	0.534	0.01068	0.0706	0.0009884	439.8	6	434.445	6.08223	407	32	-1.23253	-8.05897	-1.23253	439.8	6	Wang et al. (2016)
SWT-40.1	0.39	0.166	0.0008798	11.05	0.16575	0.4829	0.0067606	2540	29	2527.26	13.3945	2517.2	8.8	-0.503934	-0.905768	-0.905768	2517.2	8.8	Wang et al. (2016)
SWT-41.1	0.66	0.0518	0.00259	0.511	0.026572	0.0715	0.001144	445.3	6.9	419.106	20.9553	277	110	-6.24985	-60.7581	-6.24985	445.3	6.9	Wang et al. (2016)
SWT-42.1	0.79	0.1587	0.00123786	9.25	0.15725	0.423	0.006345	2274	29	2362.99	18.4314	2441	13	3.76617	6.84146	6.84146	2441	13	Wang et al. (2016)
SWT-43.1	0.62	0.0526	0.0020514	0.514	0.021588	0.0709	0.0010635	441.3	6.4	421.12	16.4237	312	90	-4.79189	-41.4423	-4.79189	441.3	6.4	Wang et al. (2016)
SWT-44.1	1.1	0.0595	0.00119	0.739	0.018475	0.09	0.00126	555.7	7.5	561.802	11.236	587	44	1.08613	5.3322	1.08613	555.7	7.5	Wang et al. (2016)
SWT-45.1	0.89	0.057	0.002736	0.845	0.043095	0.1075	0.00172	658	9.7	621.879	29.8502	493	110	-5.80837	-33.4686	-5.80837	658	9.7	Wang et al. (2016)
SWT-46.1	0.77	0.0586	0.0015822	0.583	0.018073	0.0721	0.0010815	449.1	6.6	466.371	12.592	554	58	3.70327	18.935	3.70327	449.1	6.6	Wang et al. (2016)
SWT-47.1	0.55	0.1607	0.0020891	9.81	0.21582	0.4426	0.0079668	2362	36	2417	31.4211	2463	22	2.27574	4.10069	4.10069	2463	22	Wang et al. (2016)
SWT-48.1	0.42	0.0547	0.0015316	0.532	0.016492	0.0705	0.000987	439.4	6	433.121	12.1274	399	62	-1.44978	-10.1253	-1.44978	439.4	6	Wang et al. (2016)
SWT-49.1	1.28	0.0586	0.00293	0.92	0.05336	0.1138	0.0033002	695	19	662.336	33.1168	554	110	-4.93157	-25.4513	-4.93157	695	19	Wang et al. (2016)
SWT-50.1	0.04	0.0649	0.0008437	1.199	0.021582	0.1341	0.0017433	811	10	800.096	10.4013	769	27	-1.36282	-5.46164	-1.36282	811	10	Wang et al. (2016)
SWT-51.1	0.1	0.06	0.00306	0.555	0.029415	0.0672	0.001008	419	6.1	448.251	22.8608	603	110	6.52556	30.5141	6.52556	419	6.1	Wang et al. (2016)
SWT-52.1	0.4	0.0547	0.0019145	0.536	0.020368	0.0711	0.0009954	442.7	6	435.768	15.2519	400	80	-1.59069	-10.675	-1.59069	442.7	6	Wang et al. (2016)
SWT-53.1	1.08	0.0529	0.0020102	0.519	0.021279	0.0711	0.0010665	442.6	6.3	424.468	16.1298	325	87	-4.27169	-36.1846	-4.27169	442.6	6.3	Wang et al. (2016)
SWT-54.1	0.64	0.0532	0.0024472	0.519	0.025431	0.0707	0.0012019	440.5	7.1	424.468	19.5255	338	100	-3.77695	-30.3254	-3.77695	440.5	7.1	Wang et al. (2016)
SWT-55.1	0.86	0.1163	0.0017445	5.75	0.13225	0.3585	0.0060945	1975	29	1938.85	29.0827	1901	27	-1.8646	-3.89269	-3.89269	1901	27	Wang et al. (2016)
SWT-56.1	1.02	0.1526	0.00071722	8.73	0.13095	0.4147	0.0058058	2236	26	2310.13	10.8576	2375.5	8	3.20897	5.87245	5.87245	2375.5	8	Wang et al. (2016)
SWT-57.1	0.4	0.0724	0.00055024	1.539	0.055404	0.1543	0.0055548	925	31	946.07	7.19013	996	15	2.22712	7.12851	2.22712	925	31	Wang et al. (2016)
SWT-58.1	0.53	0.0533	0.0014391	0.511	0.01533	0.0695	0.000973	433.2	5.7	419.106	11.3159	343	61	-3.36275	-26.2974	-3.36275	433.2	5.7	Wang et al. (2016)
SWT-59.1	0.8	0.0584	0.0016352	0.585	0.01872	0.0727	0.0011632	452.3	7	467.653	13.0943	544	61	3.28299	16.8566	3.28299	452.3	7	Wang et al. (2016)
SWT-60.1	0.33	0.0712	0.001424	1.594	0.03985	0.1623	0.0022722	969	13	967.83	19.3566	964	41	-0.120906	-0.518672	-0.120906	969	13	Wang et al. (2016)
SWT-61.1	0.67	0.0704	0.0033088	1.577	0.07885	0.1626	0.0027642	971	15	961.154	45.1742	939	96	-1.02442	-3.40788	-1.02442	971	15	Wang et al. (2016)
SWT-62.1	0.83	0.1305	0.00053505	6.928	0.096992	0.3851	0.0050063	2100	23	2102.18	8.61892	2104.5	7.2	0.103473	0.213828	0.213828	2104.5	7.2	Wang et al. (2016)
Site 18: Gongyi, Zhengzhou
Sample	Th/U	207Pb/206Pb	Error	207Pb/235U	Error	206Pb/238U	Error	238U-206Pb date	Error	235U-207Pb date	Error	207Pb-206Pb date	Error	Discordance 1 (238U–206Pb vs 235U–207Pb)	Discordance 2 (238U–206Pb vs 207Pb–206Pb)	Discordance	Preferred Age	Error	Data source
Name			1σ		1σ		1σ	(Ma)	1σ	(Ma)	1σ	(Ma)	1σ	(%)	(%)	(%)	(Ma)	1σ
GY-1-03	1.1697	0.056	0.001	0.547	0.017	0.071	0.001	442.791	5.032	442.816	11.239	435.617	7.77888	0.00564569	-1.64686	0.00564569	442.791	5.032	Wang et al. (2010)
GY-1-06	0.511986	0.058	0.002	0.567	0.026	0.072	0.001	446.527	5.065	456.305	16.656	529.619	18.2627	2.14286	15.689	2.14286	446.527	5.065	Wang et al. (2010)
GY-1-07	0.639831	0.055	0.003	0.551	0.041	0.071	0.003	440.886	18.078	445.972	26.781	420.859	22.9559	1.14043	-4.7586	1.14043	440.886	18.078	Wang et al. (2010)
GY-1-08	0.341159	0.067	0.003	1.579	0.128	0.188	0.018	1109.87	95.772	962.07	50.239	841.068	37.6598	-15.3627	-31.9596	-31.9596	-	-	Wang et al. (2010)
GY-1-09	0.957928	0.057	0.003	0.599	0.034	0.08	0.003	494.173	17.217	476.294	21.295	478.645	25.1918	-3.75377	-3.24416	-3.75377	494.173	17.217	Wang et al. (2010)
GY-1-10	0.787068	0.055	0.001	0.54	0.023	0.071	0.002	444.65	10.143	438.443	15.25	418.845	7.61536	-1.41569	-6.16099	-1.41569	444.65	10.143	Wang et al. (2010)
GY-1-11	0.80109	0.057	0.003	0.548	0.031	0.072	0.003	446.657	15.751	443.387	20.445	496.551	26.1343	-0.737505	10.0481	-0.737505	446.657	15.751	Wang et al. (2010)
GY-1-12	0.825998	0.054	0.003	0.535	0.036	0.072	0.002	445.819	14.414	435.267	23.559	359.484	19.9713	-2.42426	-24.0164	-2.42426	445.819	14.414	Wang et al. (2010)
GY-1-13	1.31686	0.068	0.001	1.489	0.047	0.157	0.002	941.844	11.82	926.038	18.971	881.716	12.9664	-1.70684	-6.81943	-1.70684	941.844	11.82	Wang et al. (2010)
GY-1-14	0.612826	0.063	0.003	0.622	0.032	0.072	0.001	446.728	6.173	491.357	20.053	720.297	34.2999	9.08281	37.98	9.08281	446.728	6.173	Wang et al. (2010)
GY-1-15	0.439222	0.057	0.002	0.558	0.022	0.071	0.001	442.014	5.393	450.234	14.134	506.036	17.7556	1.82572	12.6517	1.82572	442.014	5.393	Wang et al. (2010)
GY-1-16	0.828214	0.056	0.003	0.543	0.039	0.072	0.003	449.529	20.439	440.285	25.83	447.701	23.984	-2.09955	-0.408308	-2.09955	449.529	20.439	Wang et al. (2010)
GY-1-17	0.83147	0.056	0.002	0.548	0.021	0.072	0.001	446.131	5.574	443.526	13.567	443.966	15.8559	-0.587339	-0.48765	-0.587339	446.131	5.574	Wang et al. (2010)
GY-1-18	1.36273	0.068	0.002	1.294	0.045	0.138	0.002	830.746	8.849	843.057	19.773	868.094	25.5322	1.46028	4.3023	1.46028	830.746	8.849	Wang et al. (2010)
GY-1-19	0.147976	0.058	0.002	0.694	0.028	0.087	0.003	537.828	15.978	535.442	16.634	540.934	18.6529	-0.445613	0.574192	-0.445613	537.828	15.978	Wang et al. (2010)
GY-1-20	0.801888	0.057	0.001	0.562	0.015	0.071	0.001	443.406	4.216	452.693	9.715	496.588	8.71207	2.0515	10.7095	2.0515	443.406	4.216	Wang et al. (2010)
GY-1-21	0.815602	0.065	0.003	0.644	0.031	0.071	0.001	444.447	4.928	504.656	19.295	784.015	36.1853	11.9307	43.3114	11.9307	-	-	Wang et al. (2010)
GY-1-22	0.863838	0.064	0.002	0.631	0.023	0.072	0.002	447.076	12.747	496.576	14.413	747.872	23.371	9.96826	40.2203	9.96826	447.076	12.747	Wang et al. (2010)
GY-1-23	1.41875	0.058	0.001	0.573	0.013	0.071	0.001	443.751	4.641	460.133	8.29	542.948	9.36117	3.56027	18.2701	3.56027	443.751	4.641	Wang et al. (2010)
GY-1-25	0.462696	0.07	0.002	1.515	0.091	0.172	0.011	1024.41	60.677	936.54	36.751	932.782	26.6509	-9.3823	-9.82298	-9.82298	932.782	26.6509	Wang et al. (2010)
GY-1-26	0.745625	0.048	0.004	0.468	0.044	0.071	0.002	442.646	11.025	389.55	30.249	83.995	6.99958	-13.6301	-426.991	-13.6301	-	-	Wang et al. (2010)
GY-1-28	0.633511	0.052	0.001	0.494	0.023	0.068	0.001	422.447	5.091	407.898	15.502	298.037	5.73148	-3.56682	-41.7431	-3.56682	422.447	5.091	Wang et al. (2010)
GY-1-29	0.649859	0.084	0.03	0.838	0.303	0.071	0.001	442.199	8.679	617.938	169.227	1298.3	463.679	28.4396	65.9402	28.4396	-	-	Wang et al. (2010)
GY-1-30	1.10864	0.052	0.002	0.52	0.03	0.071	0.001	443.49	4.757	425.279	20.343	304.116	11.6968	-4.28213	-45.8292	-4.28213	443.49	4.757	Wang et al. (2010)
GY-1-31	0.5405	0.054	0.002	0.535	0.029	0.071	0.001	443.673	5.263	435.028	19.106	372.118	13.7821	-1.98723	-19.2291	-1.98723	443.673	5.263	Wang et al. (2010)
GY-1-32	0.707629	0.056	0.003	0.549	0.038	0.072	0.001	448.821	6.533	444.33	24.919	442.281	23.6936	-1.01074	-1.4787	-1.01074	448.821	6.533	Wang et al. (2010)
GY-1-33	1.05763	0.06	0.002	0.595	0.03	0.071	0.001	443.682	4.54	474.365	18.995	613.148	20.4383	6.46823	27.6387	6.46823	443.682	4.54	Wang et al. (2010)
GY-1-34	0.869339	0.058	0.004	0.567	0.042	0.072	0.001	449.545	7.761	456.329	27.271	516.436	35.6163	1.48665	12.9524	1.48665	449.545	7.761	Wang et al. (2010)
GY-1-35	0.549031	0.055	0.001	0.538	0.031	0.071	0.001	441.851	5.379	436.922	20.504	398.924	7.25316	-1.12812	-10.7607	-1.12812	441.851	5.379	Wang et al. (2010)
GY-1-36	0.886905	0.055	0.001	0.544	0.033	0.072	0.001	445.97	5.697	441.335	21.964	393.614	7.15662	-1.05022	-13.3014	-1.05022	445.97	5.697	Wang et al. (2010)
GY-1-37	0.575378	0.057	0.006	0.552	0.059	0.073	0.002	455.363	12.689	446.104	38.445	493.182	51.9139	-2.07552	7.66837	-2.07552	455.363	12.689	Wang et al. (2010)
GY-1-38	0.71278	0.057	0.002	0.568	0.026	0.072	0.001	448.76	5.901	456.519	17.113	499.005	17.5089	1.6996	10.069	1.6996	448.76	5.901	Wang et al. (2010)
GY-1-39	0.714591	0.058	0.005	0.559	0.046	0.071	0.001	441.14	8.851	451.052	29.707	516.289	44.5077	2.19753	14.5556	2.19753	441.14	8.851	Wang et al. (2010)
GY-1-40	0.156681	0.067	0.001	1.347	0.036	0.146	0.002	878.921	8.879	866.346	15.728	827.995	12.3581	-1.4515	-6.15052	-1.4515	878.921	8.879	Wang et al. (2010)
GY-1-41	0.444606	0.068	0.004	0.665	0.039	0.071	0.001	440.794	7.14	517.952	24.075	857.364	50.4332	14.8967	48.5873	14.8967	-	-	Wang et al. (2010)
GY-1-42	0.6452	0.053	0.003	0.517	0.031	0.07	0.001	438.303	6.847	422.937	20.48	321.693	18.209	-3.63317	-36.2488	-3.63317	438.303	6.847	Wang et al. (2010)
GY-1-43	0.927334	0.053	0.004	0.526	0.039	0.072	0.001	446.66	8.319	429.445	25.913	345.203	26.0531	-4.00866	-29.3905	-4.00866	446.66	8.319	Wang et al. (2010)
GY-1-44	0.913469	0.056	0.002	0.549	0.025	0.071	0.001	441.908	4.877	444.33	16.486	448.946	16.0338	0.54509	1.56767	0.54509	441.908	4.877	Wang et al. (2010)
GY-1-45	0.747546	0.063	0.003	0.618	0.042	0.072	0.001	445.97	7.396	488.571	26.495	705.539	33.5971	8.71951	36.7902	8.71951	445.97	7.396	Wang et al. (2010)
GY-1-46	0.473192	0.06	0.002	0.595	0.033	0.072	0.001	445.671	5.196	473.904	20.979	596.486	19.8829	5.95754	25.2839	5.95754	445.671	5.196	Wang et al. (2010)
GY-1-47	1.42343	0.054	0.002	0.533	0.028	0.072	0.001	447.221	4.536	434.073	18.519	351.392	13.0145	-3.02898	-27.2713	-3.02898	447.221	4.536	Wang et al. (2010)
GY-1-48	0.901719	0.049	0.002	0.464	0.026	0.069	0.001	432.189	5.028	386.95	18.307	125.485	5.12184	-11.6912	-244.415	-11.6912	-	-	Wang et al. (2010)
GY-1-49	0.949009	0.058	0.004	0.575	0.04	0.072	0.001	445.619	8.024	461.327	26.005	540.641	37.2856	3.40496	17.5758	3.40496	445.619	8.024	Wang et al. (2010)
GY-1-50	0.923389	0.058	0.002	0.578	0.031	0.071	0.001	444.668	4.574	463.211	19.696	544.34	18.7703	4.00314	18.3106	4.00314	444.668	4.574	Wang et al. (2010)
GY-1-51	0.418664	0.054	0.001	0.542	0.027	0.072	0.001	445.401	4.404	439.515	17.865	387.608	7.17793	-1.3392	-14.9102	-1.3392	445.401	4.404	Wang et al. (2010)
GY-1-52	0.834953	0.057	0.005	0.57	0.057	0.072	0.002	446.123	11.153	458.323	37.04	490.875	43.0592	2.66188	9.11678	2.66188	446.123	11.153	Wang et al. (2010)
GY-1-53	0.566867	0.055	0.001	0.558	0.024	0.073	0.001	451.909	4.437	450.056	15.634	413.791	7.52347	-0.411727	-9.2119	-0.411727	451.909	4.437	Wang et al. (2010)
GY-1-54	0.173907	0.16	0.001	11.233	0.461	0.504	0.005	2629.16	21.359	2542.7	38.258	2455.6	15.3475	-3.40028	-7.06789	-7.06789	2455.6	15.3475	Wang et al. (2010)
GY-1-55	0.585824	0.058	0.003	0.559	0.041	0.071	0.001	442.185	8.298	450.726	26.497	521.489	26.9736	1.89494	15.2072	1.89494	442.185	8.298	Wang et al. (2010)
GY-1-56	0.694522	0.059	0.002	0.583	0.035	0.071	0.001	442.709	7.379	466.328	22.5	575.943	19.5235	5.06489	23.1332	5.06489	442.709	7.379	Wang et al. (2010)
GY-1-57	0.316888	0.076	0.002	1.943	0.086	0.185	0.002	1092.32	13.321	1095.94	29.849	1095.1	28.8184	0.330766	0.254041	0.254041	1095.1	28.8184	Wang et al. (2010)
GY-1-58	0.587755	0.059	0.003	0.573	0.035	0.07	0.001	433.511	6.344	460.21	22.884	585.061	29.7489	5.80148	25.9033	5.80148	433.511	6.344	Wang et al. (2010)
GY-1-59	0.894868	0.059	0.002	0.577	0.026	0.071	0.001	441.746	5.753	462.836	16.443	578.469	19.6091	4.55669	23.6353	4.55669	441.746	5.753	Wang et al. (2010)
GY-1-60	1.84326	0.061	0.002	0.806	0.03	0.096	0.001	593.554	7.668	600.245	16.701	642.261	21.0577	1.11471	7.58368	1.11471	593.554	7.668	Wang et al. (2010)
GY-1-61	0.808301	0.066	0.003	1.219	0.057	0.132	0.002	801.761	11.941	809.356	26.265	821.385	37.3357	0.9384	2.38914	0.9384	801.761	11.941	Wang et al. (2010)
GY-1-62	0.618533	0.059	0.003	0.578	0.03	0.072	0.001	449.32	6.07	463.275	19.139	555.765	28.2592	3.01225	19.1529	3.01225	449.32	6.07	Wang et al. (2010)
GY-1-63	0.780431	0.062	0.002	0.668	0.033	0.078	0.002	486.198	9.213	519.626	19.805	674.413	21.7553	6.43309	27.908	6.43309	486.198	9.213	Wang et al. (2010)
GY-1-64	0.181095	0.163	0.002	9.792	0.463	0.434	0.005	2322.87	21.58	2415.37	43.603	2488.61	30.5351	3.82956	6.66005	6.66005	2488.61	30.5351	Wang et al. (2010)
GY-1-65	0.177431	0.16	0.002	9.422	0.539	0.425	0.005	2280.91	20.855	2379.97	52.535	2459.01	30.7377	4.16265	7.24314	7.24314	2459.01	30.7377	Wang et al. (2010)
GY-1-66	0.907839	0.057	0.002	0.572	0.038	0.073	0.001	456.446	6.349	459.406	24.239	492.67	17.2867	0.64431	7.35259	0.64431	456.446	6.349	Wang et al. (2010)
GY-1-67	0.469029	0.056	0.004	0.565	0.044	0.075	0.004	467.31	22.278	454.955	28.647	471.467	33.6762	-2.71565	0.881716	-2.71565	467.31	22.278	Wang et al. (2010)
GY-1-68	0.355116	0.079	0.004	0.87	0.059	0.079	0.001	491.773	5.858	635.739	32.121	1172.44	59.364	22.6455	58.0556	22.6455	-	-	Wang et al. (2010)
GY-1-69	0.412238	0.167	0.002	10.81	0.489	0.466	0.006	2465.64	25.223	2506.89	42.076	2527.43	30.2686	1.64523	2.44481	2.44481	2527.43	30.2686	Wang et al. (2010)
GY-1-70	0.656785	0.057	0.004	0.553	0.044	0.071	0.001	439.305	7.07	447.02	28.497	491.205	34.4705	1.72587	10.5659	1.72587	439.305	7.07	Wang et al. (2010)
GY-1-71	1.30267	0.056	0.002	0.544	0.034	0.071	0.001	444.178	7.922	441.372	22.129	449.898	16.0678	-0.635745	1.2714	-0.635745	444.178	7.922	Wang et al. (2010)
GY-1-72	1.0919	0.055	0.002	0.552	0.028	0.072	0.001	449.37	7.93	446.038	18.154	427.56	15.5476	-0.747022	-5.10104	-0.747022	449.37	7.93	Wang et al. (2010)
GY-1-73	0.511693	0.16	0.004	10.572	0.482	0.483	0.009	2542.4	38.553	2486.24	42.319	2450.49	61.2623	-2.25892	-3.75051	-3.75051	2450.49	61.2623	Wang et al. (2010)
GY-1-74	0.668746	0.056	0.003	0.571	0.039	0.073	0.001	452.019	7.493	458.603	25.533	470.185	25.1885	1.43566	3.86359	1.43566	452.019	7.493	Wang et al. (2010)
GY-1-75	0.640759	0.148	0.003	8.067	0.495	0.395	0.015	2145.16	69.465	2238.57	55.501	2321.67	47.0609	4.17267	7.6028	7.6028	2321.67	47.0609	Wang et al. (2010)
GY-1-76	0.192503	0.12	0.003	6.119	0.376	0.37	0.012	2031.6	56.884	1992.98	53.617	1957.18	48.9295	-1.9381	-3.80272	-3.80272	1957.18	48.9295	Wang et al. (2010)
GY-1-77	0.687713	0.061	0.005	0.585	0.053	0.071	0.002	440.047	12.089	467.959	34.035	637.72	52.2721	5.96463	30.9968	5.96463	440.047	12.089	Wang et al. (2010)
GY-1-78	0.638729	0.11	0.003	5.274	0.259	0.347	0.008	1918.96	37.587	1864.65	41.927	1807.15	49.2859	-2.91283	-6.18721	-6.18721	1807.15	49.2859	Wang et al. (2010)
GY-1-79	0.793545	0.053	0.004	0.512	0.042	0.071	0.002	444.794	11.1	419.762	27.969	308.73	23.3004	-5.96338	-44.0722	-5.96338	444.794	11.1	Wang et al. (2010)
GY-1-80	0.405692	0.164	0.002	11.323	0.573	0.497	0.007	2602.46	30.838	2550.11	47.234	2497.46	30.4568	-2.05282	-4.20423	-4.20423	2497.46	30.4568	Wang et al. (2010)
GY-1-81	0.807115	0.057	0.003	0.579	0.043	0.074	0.002	459.635	12.36	463.663	27.603	507.244	26.6971	0.868734	9.38582	0.868734	459.635	12.36	Wang et al. (2010)
GY-1-82	0.747829	0.069	0.001	1.64	0.079	0.172	0.003	1022.97	17.224	985.843	30.422	894.917	12.9698	-3.76591	-14.3088	-14.3088	-	-	Wang et al. (2010)
GY-1-83	0.823337	0.072	0.002	0.737	0.04	0.075	0.003	468.293	15.227	560.405	23.577	977.586	27.1552	16.4367	52.097	16.4367	-	-	Wang et al. (2010)
GY-1-84	2.7061	0.117	0.007	1.183	0.114	0.071	0.002	439.273	11.396	792.787	53.053	1908.29	114.171	44.5913	76.9808	44.5913	-	-	Wang et al. (2010)
GY-1-85	0.848222	0.099	0.004	4.307	0.267	0.327	0.014	1821.82	66.729	1694.69	51.122	1600.72	64.6757	-7.50165	-13.8126	-13.8126	-	-	Wang et al. (2010)
GY-1-86	0.0218624	0.161	0.001	11.213	0.568	0.501	0.006	2618.14	26.945	2540.97	47.228	2469.53	15.3387	-3.03714	-6.01778	-6.01778	2469.53	15.3387	Wang et al. (2010)
GY-1-87	1.12373	0.053	0.003	0.524	0.037	0.072	0.001	445.805	6.06	427.574	24.8	320.668	18.151	-4.26382	-39.0239	-4.26382	445.805	6.06	Wang et al. (2010)
GY-1-88	0.545344	0.055	0.007	0.511	0.063	0.07	0.002	438.789	12.975	419.078	42.168	421.957	53.7036	-4.70342	-3.98903	-4.70342	438.789	12.975	Wang et al. (2010)
GY-1-89	0.739895	0.056	0.004	0.53	0.043	0.071	0.002	442.841	9.066	431.665	28.428	449.532	32.1094	-2.58904	1.48844	-2.58904	442.841	9.066	Wang et al. (2010)
GY-1-90	0.603528	0.056	0.002	0.537	0.025	0.07	0.001	434.024	5.622	436.488	16.394	442.611	15.8075	0.564506	1.94008	0.564506	434.024	5.622	Wang et al. (2010)
GY-2-01	0.436588	0.072	0.001	1.657	0.039	0.167	0.001	997.29	7.86	992.25	15.034	972.24	13.5033	-0.507937	-2.57652	-0.507937	997.29	7.86	Wang et al. (2010)
GY-2-02	1.04338	0.055	0.001	0.542	0.016	0.071	0.001	443.85	4.26	440.001	10.434	417.27	7.58673	-0.874771	-6.36998	-0.874771	443.85	4.26	Wang et al. (2010)
GY-2-03	0.902792	0.06	0.002	0.629	0.019	0.077	0.001	479.011	4.622	495.642	11.73	590.7	19.69	3.35545	18.9079	3.35545	479.011	4.622	Wang et al. (2010)
GY-2-04	1.72667	0.075	0.004	0.763	0.046	0.073	0.001	456.87	5.245	575.96	26.264	1067.74	56.9463	20.6768	57.2117	20.6768	-	-	Wang et al. (2010)
GY-2-05	0.655911	0.059	0.002	0.55	0.018	0.068	0.001	421.456	4.125	444.722	11.798	570.999	19.3559	5.23158	26.1897	5.23158	421.456	4.125	Wang et al. (2010)
GY-2-06	1.11338	0.057	0.002	0.552	0.018	0.07	0.001	437.385	4.393	446.011	11.523	492.853	17.2931	1.93403	11.2545	1.93403	437.385	4.393	Wang et al. (2010)
GY-2-07	0.952859	0.061	0.003	0.596	0.03	0.072	0.001	450.701	5.789	474.734	18.976	628.638	30.9166	5.06241	28.3052	5.06241	450.701	5.789	Wang et al. (2010)
GY-2-08	0.50676	0.06	0.004	0.578	0.036	0.07	0.001	438.677	7.524	462.907	23.116	599.013	39.9342	5.23431	26.7667	5.23431	438.677	7.524	Wang et al. (2010)
GY-2-09	0.579152	0.056	0.002	0.58	0.026	0.076	0.001	474.731	5.535	464.38	16.565	440.67	15.7382	-2.22899	-7.72937	-2.22899	474.731	5.535	Wang et al. (2010)
GY-2-10	0.605887	0.057	0.002	0.602	0.023	0.077	0.001	475.549	7.033	478.367	14.587	500.946	17.5771	0.589087	5.06981	0.589087	475.549	7.033	Wang et al. (2010)
GY-2-11	0.778142	0.063	0.002	0.643	0.023	0.074	0.001	462.659	5.064	504.408	14.405	722.055	22.9224	8.27683	35.9247	8.27683	462.659	5.064	Wang et al. (2010)
GY-2-12	0.806563	0.072	0.001	1.638	0.04	0.166	0.002	989.739	9.127	984.765	15.449	974.217	13.5308	-0.505095	-1.59328	-0.505095	989.739	9.127	Wang et al. (2010)
GY-2-13	1.16328	0.061	0.004	0.623	0.033	0.076	0.001	472.15	8.703	491.924	20.773	637.83	41.8249	4.01973	25.9756	4.01973	472.15	8.703	Wang et al. (2010)
GY-2-14	0.357334	0.089	0.003	3.686	0.113	0.302	0.005	1700.2	22.312	1568.43	24.549	1401.33	47.2358	-8.40079	-21.3274	-21.3274	-	-	Wang et al. (2010)
GY-2-15	0.781418	0.059	0.003	0.613	0.038	0.075	0.001	467.197	8.537	485.517	23.636	562.393	28.5963	3.7733	16.927	3.7733	467.197	8.537	Wang et al. (2010)
GY-2-16	0.622179	0.053	0.003	0.565	0.03	0.078	0.001	485.487	7.09	454.86	19.197	348.023	19.6994	-6.73328	-39.4985	-6.73328	485.487	7.09	Wang et al. (2010)
GY-2-17	0.595662	0.058	0.003	0.554	0.032	0.071	0.001	442.174	6.397	447.375	20.865	532.915	27.5646	1.16256	17.0273	1.16256	442.174	6.397	Wang et al. (2010)
GY-2-18	0.778526	0.06	0.002	0.601	0.019	0.073	0.001	454.567	5.627	477.857	11.806	595.461	19.8487	4.87384	23.6613	4.87384	454.567	5.627	Wang et al. (2010)
GY-2-19	0.84815	0.055	0.002	0.552	0.022	0.072	0.001	450.765	4.87	446.169	14.526	428.256	15.5729	-1.0301	-5.25597	-1.0301	450.765	4.87	Wang et al. (2010)
GY-2-20	1.18212	0.059	0.002	0.569	0.02	0.07	0.001	438.063	6.289	457.567	13.083	554.41	18.7936	4.26255	20.9857	4.26255	438.063	6.289	Wang et al. (2010)
GY-2-21	1.21426	0.027	0.002	0.294	0.025	0.077	0.002	475.351	11.067	261.888	19.368	-	-	-81.5093	#VALUE!	-81.5093	-	-	Wang et al. (2010)
GY-2-22	0.30049	0.164	0.002	10.935	0.238	0.484	0.007	2546.3	29.563	2517.65	20.265	2494.47	30.4204	-1.13781	-2.07751	-2.07751	2494.47	30.4204	Wang et al. (2010)
GY-2-23	0.255135	0.073	0.001	1.736	0.036	0.172	0.001	1023.31	6.945	1022.13	13.35	1016.04	13.9183	-0.115641	-0.715624	-0.715624	1016.04	13.9183	Wang et al. (2010)
GY-2-24	0.372207	0.057	0.003	0.549	0.034	0.071	0.001	440.665	6.881	444.329	22.486	490.106	25.7951	0.824614	10.0878	0.824614	440.665	6.881	Wang et al. (2010)
GY-2-25	0.638021	0.056	0.001	0.551	0.014	0.071	0.001	441.847	3.634	445.525	9.069	461.763	8.24577	0.825543	4.31304	0.825543	441.847	3.634	Wang et al. (2010)
GY-2-26	0.952211	0.056	0.004	0.547	0.047	0.069	0.001	428.896	7.52	443.176	30.886	440.633	31.4738	3.2222	2.66367	3.2222	428.896	7.52	Wang et al. (2010)
GY-2-27	0.517728	0.067	0.002	1.253	0.046	0.134	0.002	812.209	10.104	824.975	20.568	834.221	24.9021	1.54744	2.63863	1.54744	812.209	10.104	Wang et al. (2010)
GY-2-28	0.753079	0.058	0.002	0.575	0.026	0.072	0.002	446.455	9.854	461.366	16.592	530.644	18.2981	3.23192	15.8654	3.23192	446.455	9.854	Wang et al. (2010)
GY-2-29	0.129894	0.162	0.004	9.088	0.449	0.407	0.017	2201.46	76.729	2346.95	45.216	2477.66	61.1767	6.19906	11.1473	11.1473	-	-	Wang et al. (2010)
GY-2-30	1.05725	0.162	0.004	10.267	0.419	0.454	0.007	2413.17	29.119	2459.12	37.744	2481.22	61.2646	1.86868	2.74257	2.74257	2481.22	61.2646	Wang et al. (2010)
GY-2-31	1.15475	0.059	0.003	0.586	0.031	0.072	0.001	446.666	6.619	468.482	19.944	551.994	28.0675	4.65674	19.0814	4.65674	446.666	6.619	Wang et al. (2010)
GY-2-32	0.92344	0.055	0.002	0.55	0.027	0.073	0.001	452.213	6.45	444.882	17.49	404.966	14.726	-1.64785	-11.6669	-1.64785	452.213	6.45	Wang et al. (2010)
GY-2-33	0.849861	0.077	0.002	2.105	0.095	0.2	0.006	1177.03	31.584	1150.57	31.018	1114.21	28.9406	-2.30008	-5.63806	-5.63806	1114.21	28.9406	Wang et al. (2010)
GY-2-34	0.521605	0.058	0.003	0.585	0.035	0.073	0.002	452.782	9.523	467.464	22.577	528.081	27.3145	3.14078	14.259	3.14078	452.782	9.523	Wang et al. (2010)
GY-2-35	0.821152	0.058	0.004	0.578	0.044	0.072	0.002	449.217	9.661	463.424	28.355	531.523	36.6568	3.06566	15.4849	3.06566	449.217	9.661	Wang et al. (2010)
GY-2-36	0.650308	0.053	0.003	0.526	0.038	0.071	0.001	444.003	7.926	429.148	25.233	328.578	18.5988	-3.46151	-35.1286	-3.46151	444.003	7.926	Wang et al. (2010)
GY-2-37	0.741134	0.057	0.003	0.579	0.038	0.072	0.001	449.94	8.794	463.643	24.536	502.887	26.4677	2.95551	10.5286	2.95551	449.94	8.794	Wang et al. (2010)
GY-2-38	0.566443	0.056	0.003	0.545	0.034	0.071	0.002	444.195	10.383	441.836	22.104	442.94	23.7289	-0.533909	-0.283334	-0.533909	444.195	10.383	Wang et al. (2010)
GY-2-39	0.968535	0.093	0.002	3.756	0.152	0.289	0.004	1637.01	18.994	1583.3	32.545	1493.81	32.125	-3.39241	-9.58601	-9.58601	1493.81	32.125	Wang et al. (2010)
GY-2-40	0.987264	0.068	0.002	1.675	0.077	0.179	0.002	1060.67	13.415	999.206	29.257	861.356	25.334	-6.15118	-23.1394	-23.1394	-	-	Wang et al. (2010)
GY-2-41	0.345253	0.093	0.002	3.637	0.172	0.278	0.007	1583.11	36.683	1557.63	37.637	1492.42	32.0951	-1.63601	-6.07677	-6.07677	1492.42	32.0951	Wang et al. (2010)
GY-2-42	0.457799	0.083	0.003	2.677	0.113	0.234	0.003	1356.38	17.022	1322.25	31.192	1267.28	45.8054	-2.5809	-7.03015	-7.03015	1267.28	45.8054	Wang et al. (2010)
GY-2-43	0.856405	0.085	0.003	2.666	0.122	0.228	0.003	1324.27	16.188	1319.22	33.845	1311.26	46.2799	-0.382574	-0.991791	-0.991791	1311.26	46.2799	Wang et al. (2010)
GY-2-44	0.896912	0.054	0.002	0.552	0.022	0.073	0.001	456.785	4.338	446.366	14.487	365.051	13.5204	-2.33418	-25.1291	-2.33418	456.785	4.338	Wang et al. (2010)
GY-2-45	0.926219	0.069	0.005	0.674	0.044	0.072	0.002	449.475	14.339	523.035	26.709	899.513	65.1821	14.0641	50.0313	14.0641	-	-	Wang et al. (2010)
GY-2-46	0.453816	0.056	0.002	0.565	0.027	0.073	0.001	454.188	5.567	454.633	17.555	454.073	16.2169	0.0978811	-0.0253263	0.0978811	454.188	5.567	Wang et al. (2010)
GY-2-47	0.593909	0.06	0.004	0.59	0.039	0.072	0.001	447.946	6.76	471.151	24.603	589.236	39.2824	4.92517	23.9785	4.92517	447.946	6.76	Wang et al. (2010)
GY-2-48	0.542921	0.055	0.006	0.549	0.06	0.073	0.002	451.868	9.576	444.181	39.411	425.436	46.4112	-1.7306	-6.21292	-1.7306	451.868	9.576	Wang et al. (2010)
GY-2-49	1.11617	0.055	0.003	0.541	0.033	0.071	0.001	443.551	6.441	438.977	21.471	409.397	22.3307	-1.04197	-8.34251	-1.04197	443.551	6.441	Wang et al. (2010)
GY-2-50	0.935328	0.056	0.002	0.548	0.033	0.071	0.001	445.089	4.607	443.893	21.627	443.05	15.8232	-0.269434	-0.460219	-0.269434	445.089	4.607	Wang et al. (2010)
GY-2-51	0.682083	0.07	0.002	1.581	0.089	0.161	0.002	965.023	11.304	962.862	34.98	937.854	26.7958	-0.224435	-2.89693	-0.224435	965.023	11.304	Wang et al. (2010)
GY-2-52	0.786267	0.176	0.002	12.555	0.505	0.511	0.005	2660.12	22.662	2646.83	37.865	2619.66	29.7689	-0.502186	-1.54436	-1.54436	2619.66	29.7689	Wang et al. (2010)
GY-2-53	0.714874	0.053	0.002	0.526	0.028	0.071	0.001	443.043	5.437	428.834	18.374	342.017	12.9063	-3.3134	-29.5383	-3.3134	443.043	5.437	Wang et al. (2010)
GY-2-54	1.09242	0.056	0.002	0.548	0.026	0.071	0.001	445.155	6.319	443.936	17.246	437.045	15.6088	-0.274589	-1.85564	-0.274589	445.155	6.319	Wang et al. (2010)
GY-2-55	0.389664	0.147	0.004	9.339	0.412	0.457	0.008	2424.2	34.643	2371.82	40.508	2313.42	62.9503	-2.20856	-4.78871	-4.78871	2313.42	62.9503	Wang et al. (2010)
GY-2-56	0.591056	0.059	0.004	0.584	0.036	0.072	0.002	446.254	10.075	466.946	23.295	584.036	39.5957	4.43135	23.5914	4.43135	446.254	10.075	Wang et al. (2010)
GY-2-57	0.483992	0.061	0.008	0.66	0.088	0.081	0.003	500.811	15.649	514.384	53.742	648.303	85.0233	2.63869	22.7505	2.63869	500.811	15.649	Wang et al. (2010)
GY-2-58	0.860594	0.053	0.002	0.387	0.019	0.053	0.001	333.353	4.09	332.294	13.814	328.687	12.4033	-0.318694	-1.41959	-0.318694	333.353	4.09	Wang et al. (2010)
GY-2-59	0.864898	0.056	0.004	0.539	0.038	0.07	0.001	435.945	7.122	438.003	25.144	469.27	33.5193	0.46986	7.10146	0.46986	435.945	7.122	Wang et al. (2010)
GY-2-60	0.393978	0.052	0.003	0.51	0.032	0.071	0.001	444.412	6.44	418.219	21.247	268.778	15.5064	-6.26299	-65.3454	-6.26299	444.412	6.44	Wang et al. (2010)
GY-2-61	0.970224	0.063	0.005	0.618	0.053	0.072	0.001	445.657	6.605	488.736	33.527	704.459	55.9094	8.81437	36.7377	8.81437	445.657	6.605	Wang et al. (2010)
GY-2-62	1.04119	0.055	0.002	0.541	0.022	0.071	0.001	443.146	4.326	439.044	14.621	408.628	14.8592	-0.934303	-8.44729	-0.934303	443.146	4.326	Wang et al. (2010)
GY-2-63	0.853988	0.056	0.003	0.548	0.032	0.071	0.001	444.637	7.542	443.875	20.665	434.371	23.2699	-0.17167	-2.36342	-0.17167	444.637	7.542	Wang et al. (2010)
GY-2-64	1.14274	0.059	0.003	0.571	0.034	0.07	0.001	438.116	6.039	458.645	21.747	559.684	28.4585	4.47601	21.7208	4.47601	438.116	6.039	Wang et al. (2010)
GY-2-65	0.703784	0.057	0.002	0.571	0.027	0.072	0.001	447.835	4.914	458.573	17.773	495.929	17.401	2.34161	9.69776	2.34161	447.835	4.914	Wang et al. (2010)
GY-2-66	0.371963	0.06	0.001	0.89	0.029	0.106	0.001	651.717	6.694	646.181	15.472	612.562	10.2094	-0.856726	-6.39201	-0.856726	651.717	6.694	Wang et al. (2010)
GY-2-67	1.07954	0.108	0.003	3.605	0.131	0.24	0.004	1387.97	18.381	1550.61	28.868	1771.87	49.2185	10.489	21.6663	21.6663	-	-	Wang et al. (2010)
GY-2-68	0.802493	0.07	0.004	0.662	0.041	0.068	0.001	424.306	5.553	515.66	25.331	938.257	53.6147	17.7159	54.7772	17.7159	-	-	Wang et al. (2010)
GY-2-69	0.641559	0.068	0.006	0.672	0.06	0.072	0.001	449.933	8.363	522.226	36.32	882.082	77.8308	13.8432	48.9919	13.8432	-	-	Wang et al. (2010)
GY-2-70	0.437049	0.054	0.001	0.544	0.019	0.072	0.001	448.61	4.736	441.077	12.681	387.169	7.1698	-1.70787	-15.8693	-1.70787	448.61	4.736	Wang et al. (2010)
GY-2-71	0.957415	0.055	0.002	0.548	0.024	0.071	0.001	444.786	4.484	443.925	16.013	431.479	15.6901	-0.193952	-3.08404	-0.193952	444.786	4.484	Wang et al. (2010)
GY-2-72	0.590686	0.121	0.016	1.263	0.167	0.075	0.002	468.307	13.088	829.161	75.202	1975.34	261.202	43.5204	76.2923	43.5204	-	-	Wang et al. (2010)
GY-2-73	0.628934	0.055	0.003	0.55	0.03	0.072	0.001	446.413	6.047	444.88	19.706	411.557	22.4486	-0.344587	-8.4693	-0.344587	446.413	6.047	Wang et al. (2010)
GY-2-74	0.729164	0.088	0.006	1.919	0.134	0.156	0.002	937.084	12.62	1087.84	46.715	1380.07	94.0958	13.8585	32.0989	13.8585	-	-	Wang et al. (2010)
GY-2-75	0.641485	0.072	0.008	0.71	0.073	0.072	0.002	447.243	11.436	544.619	43.203	977.366	108.596	17.8797	54.24	17.8797	-	-	Wang et al. (2010)
GY-2-76	0.393516	0.053	0.003	0.613	0.034	0.085	0.001	524.978	7.644	485.504	21.444	324.11	18.3458	-8.13052	-61.9753	-8.13052	524.978	7.644	Wang et al. (2010)
GY-2-77	0.533057	0.067	0.006	0.717	0.063	0.078	0.002	483.303	9.327	549.152	37.093	826.384	74.0045	11.991	41.5159	11.991	-	-	Wang et al. (2010)
GY-2-78	0.337374	0.076	0.004	1.842	0.106	0.176	0.004	1047.54	22.572	1060.45	37.813	1105.76	58.1976	1.21732	5.26491	5.26491	1105.76	58.1976	Wang et al. (2010)
GY-2-79	0.464796	0.084	0.006	0.866	0.065	0.077	0.002	477.156	13.777	633.351	35.337	1295.08	92.5056	24.6617	63.1562	24.6617	-	-	Wang et al. (2010)
GY-2-80	0.426096	0.053	0.002	0.534	0.025	0.073	0.001	456.52	5.097	434.466	16.699	307.704	11.6115	-5.07612	-48.3634	-5.07612	456.52	5.097	Wang et al. (2010)
GY-2-81	0.083044	0.067	0.001	1.717	0.073	0.185	0.002	1094.56	11.803	1015.04	27.183	832.243	12.4215	-7.83417	-31.5194	-31.5194	-	-	Wang et al. (2010)
GY-2-82	0.920032	0.062	0.003	0.66	0.042	0.077	0.001	478.46	6.223	514.897	25.388	675.731	32.6967	7.07656	29.1937	7.07656	478.46	6.223	Wang et al. (2010)
GY-2-83	0.62599	0.051	0.003	0.507	0.03	0.071	0.001	445.175	7.344	416.671	20.094	244.279	14.3694	-6.84089	-82.2404	-6.84089	445.175	7.344	Wang et al. (2010)
GY-2-84	0.327685	0.072	0.003	1.843	0.094	0.186	0.003	1099.04	13.888	1061.1	33.654	979.857	40.8274	-3.57496	-12.163	-12.163	-	-	Wang et al. (2010)
GY-2-85	0.739389	0.108	0.009	1.175	0.106	0.079	0.001	489.269	8.794	789.082	49.595	1765.97	147.164	37.9952	72.2946	37.9952	-	-	Wang et al. (2010)
GY-2-86	0.529851	0.055	0.004	0.587	0.048	0.077	0.001	480.316	7.93	469.067	30.413	417.49	30.3629	-2.39816	-15.0485	-2.39816	480.316	7.93	Wang et al. (2010)
GY-2-87	0.834123	0.068	0.003	1.651	0.077	0.176	0.002	1044.4	12.34	990.101	29.661	874.172	38.5664	-5.48388	-19.4727	-19.4727	-	-	Wang et al. (2010)
GY-2-88	0.60934	0.067	0.001	1.563	0.054	0.168	0.002	1002.21	8.722	955.581	21.279	833.928	12.4467	-4.87923	-20.179	-20.179	-	-	Wang et al. (2010)
GY-2-89	0.668946	0.061	0.005	0.604	0.053	0.072	0.001	449.75	8.274	479.541	33.868	626.734	51.3716	6.2124	28.2391	6.2124	449.75	8.274	Wang et al. (2010)
GY-2-90	0.317496	0.086	0.001	3.048	0.097	0.254	0.002	1459.89	11.361	1419.73	24.367	1349.33	15.6899	-2.82871	-8.19347	-8.19347	1349.33	15.6899	Wang et al. (2010)
Site 19: Lushan, Henan
Sample	Th/U	207Pb/206Pb	Error	207Pb/235U	Error	206Pb/238U	Error	238U-206Pb date	Error	235U-207Pb date	Error	207Pb-206Pb date	Error	Discordance 1 (238U–206Pb vs 235U–207Pb)	Discordance 2 (238U–206Pb vs 207Pb–206Pb)	Discordance	Preferred Age	Error	Data source
Name			1σ		1σ		1σ	(Ma)	1σ	(Ma)	1σ	(Ma)	1σ	(%)	(%)	(%)	(Ma)	1σ
GZY-9-001	0.439653	0.07124	0.0011	1.50897	0.02117	0.15358	0.00141	921	8	934	9	964	15	1.39186	4.46058	1.39186	921	8	Zhao and Liu (2019)
GZY-9-002	0.623887	0.15842	0.00238	9.70043	0.13156	0.44399	0.00409	2368	18	2407	12	2439	11	1.62027	2.91103	2.91103	2439	11	Zhao and Liu (2019)
GZY-9-003	1.49496	0.16034	0.00239	10.4249	0.14018	0.47144	0.0043	2490	19	2473	12	2459	11	-0.687424	-1.26068	-1.26068	2459	11	Zhao and Liu (2019)
GZY-9-004	1.43689	0.07134	0.00119	1.69112	0.02567	0.17189	0.00163	1023	9	1005	10	967	16	-1.79104	-5.79111	-5.79111	967	16	Zhao and Liu (2019)
GZY-9-005	1.0941	0.16449	0.00249	10.8159	0.14795	0.47679	0.00441	2513	19	2507	13	2502	12	-0.23933	-0.439648	-0.439648	2502	12	Zhao and Liu (2019)
GZY-9-006	0.724929	0.12377	0.00193	6.37174	0.0897	0.37329	0.0035	2045	16	2028	12	2011	13	-0.838264	-1.6907	-1.6907	2011	13	Zhao and Liu (2019)
GZY-9-007	1.65702	0.15899	0.0025	9.57253	0.13599	0.43657	0.00417	2335	19	2395	13	2445	12	2.50522	4.49898	4.49898	2445	12	Zhao and Liu (2019)
GZY-9-008	0.451147	0.10134	0.00153	3.74159	0.05097	0.26772	0.00244	1529	12	1580	11	1649	13	3.22785	7.27714	7.27714	1649	13	Zhao and Liu (2019)
GZY-9-009	0.198525	0.07099	0.0011	1.43019	0.01998	0.14609	0.00134	879	8	902	8	957	15	2.54989	8.15047	2.54989	879	8	Zhao and Liu (2019)
GZY-9-010	0.484185	0.07129	0.00119	1.57008	0.02388	0.15971	0.00151	955	8	958	9	966	16	0.313152	1.13872	0.313152	955	8	Zhao and Liu (2019)
GZY-9-011	1.67991	0.16179	0.00248	10.2735	0.14193	0.46043	0.00425	2441	19	2460	13	2474	12	0.772358	1.33387	1.33387	2474	12	Zhao and Liu (2019)
GZY-9-012	0.111176	0.15744	0.00255	9.1923	0.12383	0.42347	0.0038	2276	17	2357	12	2428	28	3.43657	6.2603	6.2603	2428	28	Zhao and Liu (2019)
GZY-9-013	0.409194	0.08973	0.00146	3.0762	0.04536	0.24857	0.00235	1431	12	1427	11	1420	15	-0.280308	-0.774648	-0.774648	1420	15	Zhao and Liu (2019)
GZY-9-014	0.537679	0.07624	0.0019	1.89977	0.04366	0.18073	0.00173	1071	9	1081	15	1101	51	0.925069	2.7248	2.7248	1101	51	Zhao and Liu (2019)
GZY-9-015	0.891538	0.07933	0.00131	2.20105	0.03308	0.20119	0.00191	1182	10	1181	10	1180	16	-0.084674	-0.169492	-0.169492	1180	16	Zhao and Liu (2019)
GZY-9-016	1.06897	0.06997	0.00126	1.56491	0.02585	0.16217	0.00159	969	9	956	10	927	18	-1.35983	-4.53074	-1.35983	969	9	Zhao and Liu (2019)
GZY-9-017	0.583159	0.07372	0.00127	1.63616	0.02572	0.16093	0.00155	962	9	984	10	1034	17	2.23577	6.96325	2.23577	962	9	Zhao and Liu (2019)
GZY-9-018	0.594468	0.07033	0.00125	1.60087	0.02612	0.16504	0.00161	985	9	971	10	938	18	-1.44181	-5.01066	-1.44181	985	9	Zhao and Liu (2019)
GZY-9-019	1.46873	0.16129	0.00253	9.89326	0.14044	0.44477	0.00418	2372	19	2425	13	2469	12	2.18557	3.92872	3.92872	2469	12	Zhao and Liu (2019)
GZY-9-020	0.830817	0.15509	0.00243	9.94189	0.141	0.46482	0.00435	2461	19	2429	13	2403	12	-1.31741	-2.41365	-2.41365	2403	12	Zhao and Liu (2019)
GZY-9-021	0.231004	0.06959	0.0014	1.40755	0.0251	0.14669	0.00136	882	8	892	11	916	42	1.12108	3.71179	1.12108	882	8	Zhao and Liu (2019)
GZY-9-022	0.291878	0.07072	0.00117	1.55882	0.02341	0.15983	0.0015	956	8	954	9	949	16	-0.209644	-0.737619	-0.209644	956	8	Zhao and Liu (2019)
GZY-9-023	0.780494	0.07362	0.00133	1.71344	0.0283	0.16875	0.00165	1005	9	1014	11	1031	18	0.887574	2.52182	2.52182	1031	18	Zhao and Liu (2019)
GZY-9-024	1.13219	0.16501	0.00275	10.5259	0.15953	0.46254	0.0046	2451	20	2482	14	2508	13	1.24899	2.27273	2.27273	2508	13	Zhao and Liu (2019)
GZY-9-025	1.54579	0.15994	0.00256	10.112	0.1468	0.45842	0.00435	2433	19	2445	13	2455	13	0.490798	0.89613	0.89613	2455	13	Zhao and Liu (2019)
GZY-9-026	1.1723	0.05481	0.00119	0.5278	0.01063	0.06982	0.00071	435	4	430	7	404	27	-1.16279	-7.67327	-1.16279	435	4	Zhao and Liu (2019)
GZY-9-027	0.694894	0.05373	0.00141	0.51562	0.0128	0.06958	0.00076	434	5	422	9	360	36	-2.8436	-20.5556	-2.8436	434	5	Zhao and Liu (2019)
GZY-9-028	0.618015	0.05615	0.00142	0.52113	0.01238	0.0673	0.00073	420	4	426	8	458	34	1.40845	8.29694	1.40845	420	4	Zhao and Liu (2019)
GZY-9-029	0.766089	0.05588	0.00207	0.54571	0.01937	0.07081	0.0009	441	5	442	13	448	56	0.226244	1.5625	0.226244	441	5	Zhao and Liu (2019)
GZY-9-030	0.884335	0.05504	0.00132	0.53134	0.01198	0.07	0.00074	436	4	433	8	414	32	-0.692841	-5.31401	-0.692841	436	4	Zhao and Liu (2019)
GZY-9-031	0.468287	0.05606	0.00138	0.54209	0.01253	0.07011	0.00075	437	5	440	8	455	32	0.681818	3.95604	0.681818	437	5	Zhao and Liu (2019)
GZY-9-032	0.852668	0.08258	0.00182	2.34697	0.04793	0.20608	0.00226	1208	12	1227	15	1259	23	1.54849	4.05083	4.05083	1259	23	Zhao and Liu (2019)
GZY-9-033	0.871991	0.05372	0.00101	0.50639	0.00877	0.06835	0.00066	426	4	416	6	359	22	-2.40385	-18.663	-2.40385	426	4	Zhao and Liu (2019)
GZY-9-034	0.785125	0.0546	0.00122	0.51489	0.01075	0.06837	0.00071	426	4	422	7	396	28	-0.947867	-7.57576	-0.947867	426	4	Zhao and Liu (2019)
GZY-9-035	1.00732	0.05548	0.00116	0.5226	0.01011	0.0683	0.00069	426	4	427	7	432	25	0.234192	1.38889	0.234192	426	4	Zhao and Liu (2019)
GZY-9-036	1.01988	0.05483	0.00142	0.51989	0.01271	0.06875	0.00075	429	5	425	8	405	35	-0.941176	-5.92593	-0.941176	429	5	Zhao and Liu (2019)
GZY-9-037	0.786588	0.05841	0.00139	0.55139	0.01232	0.06845	0.00073	427	4	446	8	545	30	4.26009	21.6514	4.26009	427	4	Zhao and Liu (2019)
GZY-9-038	0.958262	0.0591	0.00164	0.55937	0.01467	0.06862	0.00078	428	5	451	10	571	37	5.09978	25.0438	5.09978	428	5	Zhao and Liu (2019)
GZY-9-039	0.501831	0.05512	0.00133	0.51404	0.01162	0.06761	0.00072	422	4	421	8	417	32	-0.23753	-1.19904	-0.23753	422	4	Zhao and Liu (2019)
GZY-9-040	1.11889	0.05608	0.00173	0.53639	0.01572	0.06935	0.00082	432	5	436	x	456	44	0.917431	5.26316	0.917431	432	5	Zhao and Liu (2019)
GZY-9-042	1.28787	0.05624	0.00123	0.53525	0.01093	0.06901	0.00071	430	4	435	7	462	27	1.14943	6.92641	1.14943	430	4	Zhao and Liu (2019)
GZY-9-043	1.24169	0.0565	0.00129	0.52619	0.01123	0.06752	0.00071	421	4	429	7	472	29	1.8648	10.8051	1.8648	421	4	Zhao and Liu (2019)
GZY-9-044	1.34312	0.05747	0.00114	0.53213	0.00971	0.06714	0.00067	419	4	433	6	510	23	3.23326	17.8431	3.23326	419	4	Zhao and Liu (2019)
GZY-9-045	0.806927	0.05457	0.00142	0.50976	0.01248	0.06774	0.00074	423	4	418	8	395	35	-1.19617	-7.08861	-1.19617	423	4	Zhao and Liu (2019)
GZY-9-046	1.34635	0.05686	0.00142	0.53767	0.01261	0.06857	0.00074	428	4	437	8	486	33	2.0595	11.9342	2.0595	428	4	Zhao and Liu (2019)
GZY-9-047	0.732722	0.05495	0.00105	0.52091	0.00913	0.06873	0.00067	428	4	426	6	410	22	-0.469484	-4.39024	-0.469484	428	4	Zhao and Liu (2019)
GZY-9-048	1.0466	0.05356	0.00146	0.51535	0.01328	0.06976	0.00078	435	5	422	9	353	38	-3.08057	-23.2295	-3.08057	435	5	Zhao and Liu (2019)
GZY-9-051	1.33374	0.0546	0.00126	0.51579	0.0111	0.0685	0.00072	427	4	422	7	396	30	-1.18483	-7.82828	-1.18483	427	4	Zhao and Liu (2019)
GZY-9-052	0.510601	0.05664	0.00208	0.543	0.01907	0.06951	0.00088	433	5	440	13	478	55	1.59091	9.41423	1.59091	433	5	Zhao and Liu (2019)
GZY-9-053	0.740797	0.05462	0.00107	0.51033	0.00925	0.06775	0.00067	423	4	419	6	397	23	-0.954654	-6.54912	-0.954654	423	4	Zhao and Liu (2019)
GZY-9-054	0.918963	0.0551	0.00161	0.50674	0.01398	0.06669	0.00077	416	5	416	9	416	41	0	0	0	416	5	Zhao and Liu (2019)
GZY-9-055	0.866011	0.05765	0.00166	0.57989	0.01576	0.07293	0.00084	454	5	464	10	516	39	2.15517	12.0155	2.15517	454	5	Zhao and Liu (2019)
GZY-9-056	1.28288	0.05623	0.00113	0.54775	0.01012	0.07064	0.0007	440	4	444	7	461	24	0.900901	4.55531	0.900901	440	4	Zhao and Liu (2019)
GZY-9-057	1.16963	0.05529	0.00112	0.54379	0.01014	0.07131	0.00071	444	4	441	7	424	24	-0.680272	-4.71698	-0.680272	444	4	Zhao and Liu (2019)
GZY-9-058	1.21007	0.05724	0.00106	0.49877	0.00844	0.06318	0.00061	395	4	411	6	501	21	3.89294	21.1577	3.89294	395	4	Zhao and Liu (2019)
GZY-9-059	0.153444	0.06869	0.00135	1.36722	0.02364	0.14437	0.00135	869	8	875	10	889	42	0.685714	2.24972	0.685714	869	8	Zhao and Liu (2019)
GZY-9-060	1.08327	0.16399	0.00274	10.7997	0.16343	0.47752	0.0045	2516	20	2506	14	2497	13	-0.399042	-0.760913	-0.760913	2497	13	Zhao and Liu (2019)
GZY-9-061	0.926589	0.07158	0.00124	1.59772	0.02507	0.16184	0.00153	967	8	969	10	974	17	0.206398	0.718686	0.206398	967	8	Zhao and Liu (2019)
GZY-9-063	0.405082	0.08248	0.00154	2.39525	0.04097	0.21056	0.00209	1232	11	1241	12	1257	18	0.725222	1.98886	1.98886	1257	18	Zhao and Liu (2019)
GZY-9-064	0.610558	0.11117	0.00189	4.75577	0.07332	0.31019	0.00293	1742	14	1777	13	1819	15	1.96961	4.2331	4.2331	1819	15	Zhao and Liu (2019)
GZY-9-065	0.123833	0.06935	0.00133	1.45724	0.02437	0.1524	0.00142	914	8	913	10	909	40	-0.109529	-0.550055	-0.109529	914	8	Zhao and Liu (2019)
GZY-9-066	1.01061	0.1735	0.00309	13.0329	0.21178	0.54466	0.0055	2803	23	2682	15	2592	14	-4.51156	-8.14043	-8.14043	2592	14	Zhao and Liu (2019)
GZY-9-067	0.958012	0.16519	0.00289	10.9541	0.17435	0.48082	0.00471	2531	21	2519	15	2509	14	-0.47638	-0.876843	-0.876843	2509	14	Zhao and Liu (2019)
GZY-9-068	0.995519	0.15685	0.00277	10.0569	0.16133	0.46492	0.00458	2461	20	2440	15	2422	15	-0.860656	-1.61024	-1.61024	2422	15	Zhao and Liu (2019)
GZY-9-069	0.918241	0.10304	0.00179	4.17978	0.06604	0.29413	0.00281	1662	14	1670	13	1680	16	0.479042	1.07143	1.07143	1680	16	Zhao and Liu (2019)
GZY-9-070	0.28531	0.07234	0.00135	1.65661	0.02835	0.16604	0.00163	990	9	992	11	996	19	0.201613	0.60241	0.201613	990	9	Zhao and Liu (2019)
GZY-9-071	0.983937	0.07115	0.0013	1.55598	0.0259	0.15856	0.00154	949	9	953	10	962	19	0.419727	1.35135	0.419727	949	9	Zhao and Liu (2019)
GZY-9-072	0.899791	0.07634	0.0014	1.96667	0.03295	0.1868	0.00182	1104	10	1104	11	1104	19	0	0	0	1104	19	Zhao and Liu (2019)
GZY-9-073	1.28164	0.07803	0.00145	2.06772	0.03495	0.19215	0.00189	1133	10	1138	12	1148	19	0.439367	1.30662	1.30662	1148	19	Zhao and Liu (2019)
GZY-9-074	1.05961	0.11087	0.00221	4.90472	0.08981	0.32077	0.00342	1793	17	1803	15	1814	18	0.554631	1.15766	1.15766	1814	18	Zhao and Liu (2019)
GZY-9-075	0.881628	0.0717	0.00132	1.57327	0.02649	0.15911	0.00155	952	9	960	10	977	19	0.833333	2.55885	0.833333	952	9	Zhao and Liu (2019)
GZY-9-076	0.801861	0.0806	0.00146	2.25629	0.0371	0.20296	0.00197	1191	11	1199	12	1212	18	0.667223	1.73267	1.73267	1212	18	Zhao and Liu (2019)
GZY-9-077	1.0735	0.16459	0.00289	10.5166	0.16774	0.46329	0.00448	2454	20	2481	15	2503	14	1.08827	1.95765	1.95765	2503	14	Zhao and Liu (2019)
GZY-9-078	1.65804	0.18656	0.00329	12.9758	0.20796	0.50432	0.00492	2632	21	2678	15	2712	14	1.7177	2.94985	2.94985	2712	14	Zhao and Liu (2019)
GZY-9-079	0.563648	0.0802	0.00158	2.29858	0.04147	0.2078	0.00211	1217	11	1212	13	1202	20	-0.412541	-1.24792	-1.24792	1202	20	Zhao and Liu (2019)
GZY-9-080	1.09838	0.05774	0.00142	0.57085	0.01312	0.07169	0.00078	446	5	459	8	520	31	2.83224	14.2308	2.83224	446	5	Zhao and Liu (2019)
GZY-9-081	1.1987	0.05834	0.00142	0.46615	0.01058	0.05794	0.00062	363	4	389	7	543	31	6.6838	33.1492	6.6838	363	4	Zhao and Liu (2019)
GZY-9-082	0.931446	0.05464	0.00153	0.52746	0.01397	0.07	0.00079	436	5	430	9	398	39	-1.39535	-9.54774	-1.39535	436	5	Zhao and Liu (2019)
GZY-9-083	0.964286	0.05455	0.00144	0.53133	0.01315	0.07062	0.00078	440	5	433	9	394	36	-1.61663	-11.6751	-1.61663	440	5	Zhao and Liu (2019)
GZY-9-084	0.994055	0.05548	0.00147	0.54929	0.01371	0.07179	0.0008	447	5	445	9	432	36	-0.449438	-3.47222	-0.449438	447	5	Zhao and Liu (2019)
GZY-9-085	0.944318	0.04922	0.00132	0.48408	0.01229	0.07131	0.00077	444	5	401	8	158	39	-10.7232	-181.013	-10.7232	-	-	Zhao and Liu (2019)
GZY-9-086	0.868399	0.0544	0.00148	0.52204	0.01338	0.06959	0.00078	434	5	427	9	388	37	-1.63934	-11.8557	-1.63934	434	5	Zhao and Liu (2019)
GZY-9-087	0.687016	0.05532	0.00242	0.53595	0.02255	0.07024	0.00096	438	6	436	15	425	69	-0.458716	-3.05882	-0.458716	438	6	Zhao and Liu (2019)
GZY-9-088	0.952268	0.05608	0.00139	0.54925	0.01272	0.07101	0.00077	442	5	445	8	456	32	0.674157	3.07018	0.674157	442	5	Zhao and Liu (2019)
GZY-9-089	0.635332	0.05146	0.00143	0.50582	0.01327	0.07128	0.0008	444	5	416	9	261	40	-6.73077	-70.1149	-6.73077	444	5	Zhao and Liu (2019)
GZY-9-090	0.88416	0.05475	0.00131	0.51857	0.01155	0.06868	0.00073	428	4	424	8	402	31	-0.943396	-6.46766	-0.943396	428	4	Zhao and Liu (2019)
GZY-9-091	0.960056	0.05658	0.00115	0.54482	0.01021	0.06981	0.0007	435	4	442	7	475	24	1.58371	8.42105	1.58371	435	4	Zhao and Liu (2019)
GZY-9-093	0.955947	0.05354	0.00117	0.53151	0.01075	0.07198	0.00073	448	4	433	7	352	28	-3.4642	-27.2727	-3.4642	448	4	Zhao and Liu (2019)
GZY-9-094	0.210908	0.07564	0.0014	1.84852	0.03121	0.17719	0.00172	1052	9	1063	11	1086	19	1.03481	3.13076	3.13076	1086	19	Zhao and Liu (2019)
GZY-9-095	1.0672	0.05617	0.00118	0.55069	0.01064	0.07109	0.00072	443	4	445	7	459	25	0.449438	3.48584	0.449438	443	4	Zhao and Liu (2019)
GZY-9-096	0.664378	0.05531	0.00134	0.54787	0.01236	0.07182	0.00077	447	5	444	8	425	31	-0.675676	-5.17647	-0.675676	447	5	Zhao and Liu (2019)
GZY-9-097	1.17298	0.05689	0.00114	0.52312	0.00962	0.06667	0.00066	416	4	427	6	487	24	2.57611	14.5791	2.57611	416	4	Zhao and Liu (2019)
GZY-9-098	1.03496	0.05637	0.003	0.53942	0.02811	0.0694	0.00077	433	5	438	19	467	121	1.14155	7.28051	1.14155	433	5	Zhao and Liu (2019)
GZY-9-099	0.972648	0.05473	0.00115	0.56906	0.01107	0.07539	0.00076	469	5	457	7	401	26	-2.62582	-16.9576	-2.62582	469	5	Zhao and Liu (2019)
GZY-9-100	1.17078	0.0559	0.00109	0.50362	0.00897	0.06532	0.00064	408	4	414	6	448	23	1.44928	8.92857	1.44928	408	4	Zhao and Liu (2019)
GZY-9-101	0.851235	0.05589	0.00124	0.55036	0.01131	0.0714	0.00073	445	4	445	7	448	28	0	0.669643	0	445	4	Zhao and Liu (2019)
GZY-9-103	0.53204	0.05594	0.00142	0.56718	0.01347	0.07351	0.0008	457	5	456	9	450	33	-0.219298	-1.55556	-0.219298	457	5	Zhao and Liu (2019)
GZY-9-104	0.556697	0.05242	0.00245	0.5503	0.02484	0.07612	0.00106	473	6	445	16	304	77	-6.29213	-55.5921	-6.29213	473	6	Zhao and Liu (2019)
GZY-9-105	0.903181	0.06253	0.00145	0.62158	0.01337	0.07207	0.00077	449	5	491	8	692	28	8.55397	35.1156	8.55397	449	5	Zhao and Liu (2019)
GZY-9-106	1.15277	0.05528	0.00112	0.53278	0.00989	0.06988	0.0007	435	4	434	7	424	24	-0.230415	-2.59434	-0.230415	435	4	Zhao and Liu (2019)
GZY-5-001	0.720199	0.05508	0.00094	0.55581	0.00869	0.07317	0.00069	455	4	449	6	415	19	-1.3363	-9.63855	-1.3363	455	4	Zhao and Liu (2019)
GZY-5-002	0.885175	0.05862	0.00139	0.60357	0.01349	0.07466	0.0008	464	5	479	9	553	30	3.13152	16.094	3.13152	464	5	Zhao and Liu (2019)
GZY-5-003	0.839936	0.05676	0.00213	0.58258	0.021	0.07443	0.00095	463	6	466	13	482	57	0.643777	3.94191	0.643777	463	6	Zhao and Liu (2019)
GZY-5-004	0.462337	0.05988	0.00084	0.75827	0.00958	0.09182	0.00082	566	5	573	6	599	13	1.22164	5.50918	1.22164	566	5	Zhao and Liu (2019)
GZY-5-005	0.698421	0.05506	0.00123	0.53669	0.01124	0.07068	0.00073	440	4	436	7	415	29	-0.917431	-6.0241	-0.917431	440	4	Zhao and Liu (2019)
GZY-5-006	0.649823	0.0576	0.00157	0.55654	0.01435	0.07006	0.00079	437	5	449	9	515	37	2.67261	15.1456	2.67261	437	5	Zhao and Liu (2019)
GZY-5-008	0.685242	0.05789	0.00213	0.57723	0.0204	0.07231	0.00091	450	5	463	13	526	55	2.80778	14.4487	2.80778	450	5	Zhao and Liu (2019)
GZY-5-009	1.3514	0.16016	0.00221	10.317	0.12784	0.4671	0.00427	2471	19	2464	11	2457	10	-0.284091	-0.569801	-0.569801	2457	10	Zhao and Liu (2019)
GZY-5-010	0.644624	0.05791	0.00161	0.56834	0.01497	0.07116	0.00081	443	5	457	10	526	38	3.06346	15.7795	3.06346	443	5	Zhao and Liu (2019)
GZY-5-011	0.967387	0.05575	0.00115	0.55119	0.01059	0.0717	0.00072	446	4	446	7	442	25	0	-0.904977	0	446	4	Zhao and Liu (2019)
GZY-5-012	0.921402	0.05557	0.00117	0.55981	0.01105	0.07304	0.00074	454	4	451	7	435	26	-0.665188	-4.36782	-0.665188	454	4	Zhao and Liu (2019)
GZY-5-013	0.99534	0.05714	0.00125	0.56477	0.01152	0.07167	0.00074	446	4	455	7	497	27	1.97802	10.2616	1.97802	446	4	Zhao and Liu (2019)
GZY-5-014	1.0037	0.05613	0.00099	0.54707	0.00886	0.07067	0.00068	440	4	443	6	458	20	0.677201	3.93013	0.677201	440	4	Zhao and Liu (2019)
GZY-5-015	0.949131	0.05549	0.00105	0.54474	0.00959	0.07119	0.0007	443	4	442	6	432	22	-0.226244	-2.5463	-0.226244	443	4	Zhao and Liu (2019)
GZY-5-017	0.779957	0.10942	0.00152	4.76789	0.05941	0.31597	0.00285	1770	14	1779	10	1790	11	0.505902	1.11732	1.11732	1790	11	Zhao and Liu (2019)
GZY-5-018	0.601083	0.05797	0.0015	0.60836	0.01482	0.07609	0.00084	473	5	483	9	529	34	2.07039	10.586	2.07039	473	5	Zhao and Liu (2019)
GZY-5-019	0.446424	0.05745	0.00153	0.59853	0.01511	0.07555	0.00084	470	5	476	10	509	36	1.2605	7.66208	1.2605	470	5	Zhao and Liu (2019)
GZY-5-020	0.939008	0.0538	0.00134	0.53616	0.01257	0.07226	0.00077	450	5	436	8	363	34	-3.21101	-23.9669	-3.21101	450	5	Zhao and Liu (2019)
GZY-5-021	1.32285	0.05491	0.00092	0.52086	0.00801	0.06879	0.00065	429	4	426	5	409	18	-0.704225	-4.88998	-0.704225	429	4	Zhao and Liu (2019)
GZY-5-022	1.03652	0.05611	0.00131	0.56103	0.01228	0.07251	0.00076	451	5	452	8	457	30	0.221239	1.31291	0.221239	451	5	Zhao and Liu (2019)
GZY-5-023	0.848183	0.05387	0.00127	0.53725	0.01193	0.07232	0.00076	450	5	437	8	366	31	-2.97483	-22.9508	-2.97483	450	5	Zhao and Liu (2019)
GZY-5-024	0.876942	0.05458	0.00102	0.53512	0.00926	0.0711	0.00069	443	4	435	6	395	22	-1.83908	-12.1519	-1.83908	443	4	Zhao and Liu (2019)
GZY-5-025	1.00714	0.0564	0.00113	0.54934	0.01028	0.07062	0.00071	440	4	445	7	468	24	1.1236	5.98291	1.1236	440	4	Zhao and Liu (2019)
GZY-5-026	0.384927	0.05306	0.00145	0.52564	0.01362	0.07183	0.00079	447	5	429	9	331	39	-4.1958	-35.0453	-4.1958	447	5	Zhao and Liu (2019)
GZY-5-028	0.718387	0.05655	0.00118	0.54612	0.01066	0.07003	0.00071	436	4	442	7	474	26	1.35747	8.01688	1.35747	436	4	Zhao and Liu (2019)
GZY-5-029	0.969273	0.07037	0.00116	1.55203	0.02335	0.15992	0.00152	956	8	951	9	939	16	-0.525762	-1.81044	-0.525762	956	8	Zhao and Liu (2019)
GZY-5-030	0.965777	0.05675	0.00113	0.58219	0.01075	0.07439	0.00074	463	4	466	7	482	24	0.643777	3.94191	0.643777	463	4	Zhao and Liu (2019)
GZY-5-031	1.19279	0.0552	0.00091	0.51266	0.00775	0.06734	0.00063	420	4	420	5	420	18	0	0	0	420	4	Zhao and Liu (2019)
GZY-5-032	1.0804	0.05498	0.00105	0.53062	0.0094	0.06998	0.00069	436	4	432	6	411	22	-0.925926	-6.08273	-0.925926	436	4	Zhao and Liu (2019)
GZY-5-033	0.983152	0.05573	0.00114	0.55222	0.01051	0.07185	0.00072	447	4	446	7	442	25	-0.224215	-1.13122	-0.224215	447	4	Zhao and Liu (2019)
GZY-5-034	1.10246	0.05769	0.00094	0.4967	0.00741	0.06243	0.00058	390	4	409	5	518	17	4.64548	24.7104	4.64548	390	4	Zhao and Liu (2019)
GZY-5-035	1.07702	0.05532	0.00119	0.52831	0.01066	0.06925	0.00071	432	4	431	7	425	27	-0.232019	-1.64706	-0.232019	432	4	Zhao and Liu (2019)
GZY-5-036	0.894648	0.05517	0.0012	0.52609	0.01071	0.06915	0.00071	431	4	429	7	419	27	-0.4662	-2.86396	-0.4662	431	4	Zhao and Liu (2019)
GZY-5-037	0.671751	0.05932	0.00106	0.57815	0.00954	0.07068	0.00068	440	4	463	6	579	20	4.9676	24.0069	4.9676	440	4	Zhao and Liu (2019)
GZY-5-038	0.798989	0.05483	0.00132	0.54665	0.01243	0.07229	0.00077	450	5	443	8	405	32	-1.58014	-11.1111	-1.58014	450	5	Zhao and Liu (2019)
GZY-5-039	1.01039	0.15866	0.00264	9.87273	0.14945	0.4512	0.00471	2401	21	2423	14	2441	13	0.907965	1.63867	1.63867	2441	13	Zhao and Liu (2019)
GZY-5-040	0.525162	0.05431	0.00244	0.53208	0.02312	0.07105	0.00097	442	6	433	15	384	73	-2.07852	-15.1042	-2.07852	442	6	Zhao and Liu (2019)
GZY-5-041	0.657703	0.05595	0.00181	0.52557	0.01622	0.06811	0.00081	425	5	429	11	450	47	0.932401	5.55556	0.932401	425	5	Zhao and Liu (2019)
GZY-5-042	0.464605	0.05586	0.00124	0.52285	0.01089	0.06787	0.0007	423	4	427	7	447	28	0.936768	5.36913	0.936768	423	4	Zhao and Liu (2019)
GZY-5-043	1.09181	0.05524	0.00128	0.52188	0.01132	0.06851	0.00072	427	4	426	8	422	30	-0.234742	-1.18483	-0.234742	427	4	Zhao and Liu (2019)
GZY-5-044	1.81126	0.07503	0.00146	1.85849	0.03332	0.17962	0.00185	1065	10	1066	12	1069	20	0.0938086	0.374181	0.374181	1069	20	Zhao and Liu (2019)
GZY-5-045	0.914332	0.05531	0.00138	0.51454	0.01208	0.06746	0.00073	421	4	421	8	425	33	0	0.941176	0	421	4	Zhao and Liu (2019)
GZY-5-046	1.71162	0.05688	0.00146	0.5635	0.01369	0.07183	0.00079	447	5	454	9	487	34	1.54185	8.21355	1.54185	447	5	Zhao and Liu (2019)
GZY-5-047	1.25357	0.0563	0.00113	0.52005	0.00974	0.06698	0.00067	418	4	425	7	464	24	1.64706	9.91379	1.64706	418	4	Zhao and Liu (2019)
GZY-5-048	0.842437	0.05727	0.00142	0.53811	0.01257	0.06813	0.00073	425	4	437	8	502	33	2.746	15.3386	2.746	425	4	Zhao and Liu (2019)
GZY-5-050	1.25232	0.06972	0.00117	1.52528	0.02333	0.15864	0.00151	949	8	941	9	920	17	-0.850159	-3.15217	-0.850159	949	8	Zhao and Liu (2019)
GZY-5-051	1.24927	0.05536	0.00106	0.50397	0.0089	0.06601	0.00065	412	4	414	6	427	22	0.483092	3.51288	0.483092	412	4	Zhao and Liu (2019)
GZY-5-052	0.932512	0.056	0.00102	0.51586	0.00866	0.06679	0.00064	417	4	422	6	452	21	1.18483	7.74336	1.18483	417	4	Zhao and Liu (2019)
GZY-5-053	0.818343	0.07412	0.00134	1.82369	0.03026	0.1784	0.00177	1058	10	1054	11	1045	18	-0.379507	-1.24402	-1.24402	1045	18	Zhao and Liu (2019)
GZY-5-054	0.234321	0.06884	0.00107	1.38345	0.01941	0.14573	0.00135	877	8	882	8	894	15	0.566893	1.90157	0.566893	877	8	Zhao and Liu (2019)
GZY-5-055	0.99156	0.05456	0.00109	0.51726	0.0096	0.06875	0.00068	429	4	423	6	394	24	-1.41844	-8.88325	-1.41844	429	4	Zhao and Liu (2019)
GZY-5-056	1.10612	0.15971	0.00244	9.49589	0.13113	0.43112	0.0041	2311	18	2387	13	2453	12	3.18391	5.78883	5.78883	2453	12	Zhao and Liu (2019)
GZY-5-057	1.24614	0.05576	0.00125	0.52686	0.01107	0.06851	0.00071	427	4	430	7	443	29	0.697674	3.61174	0.697674	427	4	Zhao and Liu (2019)
GZY-5-058	0.916561	0.05569	0.00123	0.52254	0.01078	0.06804	0.0007	424	4	427	7	440	28	0.702576	3.63636	0.702576	424	4	Zhao and Liu (2019)
GZY-5-059	0.450112	0.16558	0.00271	10.6066	0.15815	0.46447	0.00473	2459	21	2489	14	2513	12	1.2053	2.14883	2.14883	2513	12	Zhao and Liu (2019)
GZY-5-060	0.89254	0.05414	0.00112	0.51908	0.00997	0.06952	0.0007	433	4	425	7	377	25	-1.88235	-14.8541	-1.88235	433	4	Zhao and Liu (2019)
GZY-5-061	0.67943	0.05564	0.00163	0.5281	0.0147	0.06882	0.00079	429	5	431	10	438	41	0.464037	2.05479	0.464037	429	5	Zhao and Liu (2019)
GZY-5-062	1.16617	0.05527	0.00126	0.53272	0.01136	0.06989	0.00073	435	4	434	8	423	29	-0.230415	-2.83688	-0.230415	435	4	Zhao and Liu (2019)
GZY-5-063	0.983545	0.05452	0.00097	0.50175	0.00824	0.06673	0.00064	416	4	413	6	393	20	-0.726392	-5.85242	-0.726392	416	4	Zhao and Liu (2019)
GZY-5-064	0.740607	0.05668	0.00119	0.5443	0.01067	0.06963	0.00071	434	4	441	7	479	26	1.5873	9.39457	1.5873	434	4	Zhao and Liu (2019)
GZY-5-065	1.06821	0.05463	0.00119	0.51898	0.01054	0.06888	0.0007	429	4	424	7	397	28	-1.17925	-8.06045	-1.17925	429	4	Zhao and Liu (2019)
GZY-5-066	0.809668	0.05834	0.00114	0.55171	0.00993	0.06857	0.00068	428	4	446	6	543	22	4.03587	21.1786	4.03587	428	4	Zhao and Liu (2019)
GZY-5-067	0.632553	0.05569	0.00152	0.35626	0.0092	0.04639	0.00052	292	3	309	7	440	38	5.50162	33.6364	5.50162	292	3	Zhao and Liu (2019)
GZY-5-068	0.469031	0.06976	0.00115	1.43835	0.02158	0.14951	0.00141	898	8	905	9	921	16	0.773481	2.49729	0.773481	898	8	Zhao and Liu (2019)
GZY-5-069	0.889357	0.05673	0.0016	0.55434	0.01484	0.07086	0.00081	441	5	448	10	481	39	1.5625	8.31601	1.5625	441	5	Zhao and Liu (2019)
SBH-8-001	0.714828	0.05578	0.0009	0.54112	0.00809	0.07035	0.00065	438	4	439	5	444	18	0.22779	1.35135	0.22779	438	4	Zhao and Liu (2019)
SBH-8-002	0.669734	0.05615	0.0017	0.57221	0.01667	0.0739	0.00079	460	5	459	11	458	46	-0.217865	-0.436681	-0.217865	460	5	Zhao and Liu (2019)
SBH-8-004	0.553121	0.05874	0.00103	0.6819	0.01103	0.08419	0.00081	521	5	528	7	557	19	1.32576	6.4632	1.32576	521	5	Zhao and Liu (2019)
SBH-8-005	0.721553	0.09885	0.00131	4.00773	0.04786	0.29401	0.00266	1662	13	1636	10	1603	10	-1.58924	-3.6806	-3.6806	1603	10	Zhao and Liu (2019)
SBH-8-006	0.687966	0.05817	0.00136	0.57287	0.01258	0.07142	0.00077	445	5	460	8	536	29	3.26087	16.9776	3.26087	445	5	Zhao and Liu (2019)
SBH-8-007	0.475977	0.06749	0.00126	1.27208	0.022	0.13669	0.00138	826	8	833	10	853	20	0.840336	3.1653	0.840336	826	8	Zhao and Liu (2019)
SBH-8-008	0.493718	0.10343	0.00134	4.15483	0.04825	0.29132	0.0026	1648	13	1665	10	1687	10	1.02102	2.3118	2.3118	1687	10	Zhao and Liu (2019)
SBH-8-010	0.564879	0.05775	0.00175	0.59736	0.01725	0.07501	0.0009	466	5	476	11	520	42	2.10084	10.3846	2.10084	466	5	Zhao and Liu (2019)
SBH-8-012	0.683568	0.06672	0.00094	1.21149	0.01555	0.13167	0.0012	797	7	806	7	829	13	1.11663	3.86007	1.11663	797	7	Zhao and Liu (2019)
SBH-8-013	0.645816	0.07836	0.0011	2.2401	0.02843	0.2073	0.0019	1214	10	1194	9	1156	12	-1.67504	-5.0173	-5.0173	1156	12	Zhao and Liu (2019)
SBH-8-015	1.24578	0.08777	0.00122	2.91127	0.03648	0.24054	0.0022	1390	11	1385	9	1377	12	-0.361011	-0.944081	-0.944081	1377	12	Zhao and Liu (2019)
SBH-8-017	0.826898	0.07222	0.001	1.54048	0.01921	0.15468	0.0014	927	8	947	8	992	12	2.11193	6.55242	2.11193	927	8	Zhao and Liu (2019)
SBH-8-018	1.30615	0.09692	0.00135	3.52843	0.04456	0.26401	0.00244	1510	12	1534	10	1566	11	1.56454	3.57599	3.57599	1566	11	Zhao and Liu (2019)
SBH-8-019	0.582375	0.08773	0.00129	2.86398	0.03834	0.23673	0.00223	1370	12	1372	10	1377	13	0.145773	0.508351	0.508351	1377	13	Zhao and Liu (2019)
SBH-8-020	1.06094	0.07849	0.00111	2.1999	0.02825	0.20324	0.00187	1193	10	1181	9	1159	12	-1.01609	-2.93356	-2.93356	1159	12	Zhao and Liu (2019)
SBH-8-021	1.30399	0.07235	0.00168	1.37843	0.03001	0.13816	0.00156	834	9	880	13	996	26	5.22727	16.2651	5.22727	834	9	Zhao and Liu (2019)
SBH-8-023	1.01163	0.10317	0.00136	4.14947	0.04912	0.29165	0.00262	1650	13	1664	10	1682	10	0.841346	1.9025	1.9025	1682	10	Zhao and Liu (2019)
SBH-8-025	1.46655	0.09589	0.0013	3.40558	0.04139	0.25754	0.00233	1477	12	1506	10	1546	11	1.92563	4.46313	4.46313	1546	11	Zhao and Liu (2019)
SBH-8-027	1.39422	0.07749	0.00129	1.54803	0.0235	0.14487	0.00142	872	8	950	9	1134	16	8.21053	23.1041	8.21053	872	8	Zhao and Liu (2019)
SBH-8-028	1.14225	0.16233	0.00253	10.0949	0.14332	0.45097	0.00469	2400	21	2444	13	2480	11	1.80033	3.22581	3.22581	2480	11	Zhao and Liu (2019)
SBH-8-029	0.703618	0.11257	0.00171	5.13034	0.07077	0.3305	0.00322	1841	16	1841	12	1841	12	0	0	0	1841	12	Zhao and Liu (2019)
SBH-8-030	0.740633	0.0569	0.00145	0.63952	0.01544	0.0815	0.0009	505	5	502	10	488	34	-0.59761	-3.48361	-0.59761	505	5	Zhao and Liu (2019)
SBH-8-032	0.564992	0.05344	0.00139	0.37913	0.00935	0.05145	0.00057	323	3	326	7	348	36	0.920245	7.18391	0.920245	323	3	Zhao and Liu (2019)
SBH-8-033	0.824573	0.0894	0.0013	3.02135	0.03982	0.24508	0.00229	1413	12	1413	10	1413	12	0	0	0	1413	12	Zhao and Liu (2019)
SBH-8-034	0.538554	0.05638	0.0028	0.40245	0.0193	0.05177	0.00078	325	5	343	14	467	79	5.24781	30.4069	5.24781	325	5	Zhao and Liu (2019)
SBH-8-035	0.72969	0.05665	0.0008	0.53846	0.0069	0.06893	0.00062	430	4	437	5	478	14	1.60183	10.0418	1.60183	430	4	Zhao and Liu (2019)
SBH-8-036	0.56068	0.11928	0.00157	5.79725	0.06853	0.35243	0.00317	1946	15	1946	10	1945	10	0	-0.0514139	-0.0514139	1945	10	Zhao and Liu (2019)
SBH-8-037	1.87828	0.08577	0.0012	2.54018	0.03196	0.21477	0.00196	1254	10	1284	9	1333	12	2.33645	5.92648	5.92648	1333	12	Zhao and Liu (2019)
SBH-8-038	0.683682	0.10123	0.00146	3.81596	0.04975	0.27334	0.00256	1558	13	1596	10	1647	12	2.38095	5.40376	5.40376	1647	12	Zhao and Liu (2019)
SBH-8-039	1.26975	0.07782	0.00139	2.12366	0.03502	0.1979	0.002	1164	11	1157	11	1142	18	-0.605013	-1.92644	-1.92644	1142	18	Zhao and Liu (2019)
SBH-8-040	0.658865	0.18664	0.00248	13.7013	0.16317	0.53235	0.00487	2751	20	2729	11	2713	9	-0.806156	-1.40066	-1.40066	2713	9	Zhao and Liu (2019)
SBH-8-042	0.386856	0.06208	0.00087	0.89271	0.01129	0.10427	0.00094	639	5	648	6	677	13	1.38889	5.613	1.38889	639	5	Zhao and Liu (2019)
SBH-8-043	0.641397	0.07707	0.00105	1.96252	0.02405	0.18464	0.00166	1092	9	1103	8	1123	12	0.99728	2.76046	2.76046	1123	12	Zhao and Liu (2019)
SBH-8-045	0.680423	0.16539	0.00219	10.8565	0.12876	0.476	0.00431	2510	19	2511	11	2512	9	0.0398248	0.0796178	0.0796178	2512	9	Zhao and Liu (2019)
SBH-8-046	0.65992	0.05206	0.00149	0.34113	0.0093	0.04751	0.00054	299	3	298	7	288	41	-0.33557	-3.81944	-0.33557	299	3	Zhao and Liu (2019)
SBH-8-047	1.35592	0.05617	0.00108	0.36871	0.00661	0.0476	0.00047	300	3	319	5	459	23	5.95611	34.6405	5.95611	300	3	Zhao and Liu (2019)
SBH-8-048	1.20263	0.08954	0.00131	3.18163	0.04228	0.25768	0.00241	1478	12	1453	10	1416	12	-1.72058	-4.37853	-4.37853	1416	12	Zhao and Liu (2019)
SBH-8-049	0.772484	0.10791	0.00144	4.87039	0.05849	0.32729	0.00295	1825	14	1797	10	1764	10	-1.55815	-3.45805	-3.45805	1764	10	Zhao and Liu (2019)
SBH-8-050	0.896065	0.05761	0.00115	0.66291	0.0124	0.08343	0.00081	517	5	516	8	515	24	-0.193798	-0.38835	-0.193798	517	5	Zhao and Liu (2019)
SBH-8-051	1.71631	0.25555	0.00335	21.0591	0.24711	0.59757	0.00538	3020	22	3141	11	3219	9	3.85228	6.18204	6.18204	3219	9	Zhao and Liu (2019)
SBH-8-052	1.23124	0.06494	0.00096	0.96409	0.01297	0.10766	0.00099	659	6	685	7	772	14	3.79562	14.6373	3.79562	659	6	Zhao and Liu (2019)
SBH-8-053	0.399424	0.07005	0.00099	1.48444	0.0189	0.15368	0.00139	922	8	924	8	930	13	0.21645	0.860215	0.21645	922	8	Zhao and Liu (2019)
SBH-8-054	0.867006	0.09699	0.00134	3.63344	0.04511	0.27166	0.00247	1549	13	1557	10	1567	11	0.513809	1.14869	1.14869	1567	11	Zhao and Liu (2019)
SBH-8-055	0.735564	0.0558	0.00093	0.54475	0.00832	0.0708	0.00067	441	4	442	5	444	18	0.226244	0.675676	0.226244	441	4	Zhao and Liu (2019)
SBH-8-056	0.752085	0.05282	0.00157	0.35421	0.01004	0.04863	0.00055	306	3	308	8	321	44	0.649351	4.6729	0.649351	306	3	Zhao and Liu (2019)
SBH-8-057	0.703528	0.08655	0.00125	2.8196	0.03696	0.23624	0.00218	1367	11	1361	10	1350	12	-0.440852	-1.25926	-1.25926	1350	12	Zhao and Liu (2019)
SBH-8-058	0.775018	0.05721	0.00099	0.65505	0.01045	0.08302	0.00079	514	5	512	6	500	19	-0.390625	-2.8	-0.390625	514	5	Zhao and Liu (2019)
SBH-8-059	1.05024	0.07274	0.0012	1.68157	0.02536	0.16764	0.00161	999	9	1002	10	1007	16	0.299401	0.794439	0.299401	999	9	Zhao and Liu (2019)
SBH-8-060	0.685087	0.05904	0.001	0.67438	0.01046	0.08282	0.00079	513	5	523	6	569	18	1.91205	9.84183	1.91205	513	5	Zhao and Liu (2019)
SBH-8-061	1.75056	0.10017	0.0015	4.08233	0.05556	0.29554	0.0028	1669	14	1651	11	1627	12	-1.09025	-2.58144	-2.58144	1627	12	Zhao and Liu (2019)
SBH-8-063	0.050316	0.06089	0.00093	0.86123	0.01194	0.10256	0.00095	629	6	631	7	635	15	0.316957	0.944882	0.316957	629	6	Zhao and Liu (2019)
SBH-8-064	0.405322	0.07412	0.00103	1.69249	0.02126	0.16559	0.00149	988	8	1006	8	1045	12	1.78926	5.45455	1.78926	988	8	Zhao and Liu (2019)
SBH-8-065	0.846599	0.07661	0.00126	2.0465	0.03087	0.19372	0.00187	1141	10	1131	10	1111	16	-0.884173	-2.70027	-2.70027	1111	16	Zhao and Liu (2019)
SBH-8-066	0.76392	0.05606	0.00114	0.54658	0.01035	0.0707	0.00071	440	4	443	7	455	25	0.677201	3.2967	0.677201	440	4	Zhao and Liu (2019)
SBH-8-067	1.61571	0.09974	0.00155	3.64057	0.05141	0.26467	0.00255	1514	13	1558	11	1619	13	2.82413	6.48548	6.48548	1619	13	Zhao and Liu (2019)
SBH-8-068	0.862323	0.05567	0.00138	0.62114	0.01461	0.08091	0.00087	502	5	491	9	439	33	-2.24033	-14.3508	-2.24033	502	5	Zhao and Liu (2019)
SBH-8-069	0.575276	0.07082	0.00159	1.59994	0.03358	0.16383	0.00178	978	10	970	13	952	25	-0.824742	-2.73109	-0.824742	978	10	Zhao and Liu (2019)
SBH-8-070	0.666913	0.07891	0.0012	2.19546	0.03028	0.20175	0.00189	1185	10	1180	10	1170	14	-0.423729	-1.28205	-1.28205	1170	14	Zhao and Liu (2019)
SBH-8-071	0.707263	0.15624	0.00219	9.91164	0.12515	0.46001	0.00428	2440	19	2427	12	2415	10	-0.535641	-1.0352	-1.0352	2415	10	Zhao and Liu (2019)
Site 20: Quli, Sanmenxia
Sample	Th/U	207Pb/206Pb	Error	207Pb/235U	Error	206Pb/238U	Error	238U-206Pb date	Error	235U-207Pb date	Error	207Pb-206Pb date	Error	Discordance 1 (238U–206Pb vs 235U–207Pb)	Discordance 2 (238U–206Pb vs 207Pb–206Pb)	Discordance	Preferred Age	Error	Data source
Name			1σ		1σ		1σ	(Ma)	1σ	(Ma)	1σ	(Ma)	1σ	(%)	(%)	(%)	(Ma)	1σ
13H16A-01	0.63	0.071	0.0027	1.5643	0.0591	0.1598	0.0031	956	17	956	23	957	46	0	0.104493	0	956	17	Wang et al. (2020)
13H16A-02	0.67	0.0558	0.0018	0.5405	0.0179	0.0703	0.0013	438	8	439	12	442	42	0.22779	0.904977	0.22779	438	8	Wang et al. (2020)
13H16A-03	0.38	0.0707	0.0012	1.5647	0.0278	0.1606	0.0027	960	15	956	11	948	16	-0.41841	-1.26582	-0.41841	960	15	Wang et al. (2020)
13H16A-04	0.23	0.0699	0.0012	1.5535	0.0274	0.1613	0.0027	964	15	952	11	924	16	-1.2605	-4.329	-1.2605	964	15	Wang et al. (2020)
13H16A-05	0.68	0.0556	0.0018	0.5487	0.0182	0.0715	0.0013	445	8	444	12	437	43	-0.225225	-1.83066	-0.225225	445	8	Wang et al. (2020)
13H16A-06	0.33	0.0551	0.002	0.4131	0.0153	0.0544	0.001	342	6	351	11	414	50	2.5641	17.3913	2.5641	342	6	Wang et al. (2020)
13H16A-07	0.9	0.0563	0.0016	0.59	0.0166	0.0761	0.0013	473	8	471	11	462	33	-0.424628	-2.38095	-0.424628	473	8	Wang et al. (2020)
13H16A-08	0.73	0.0606	0.0018	0.8339	0.0244	0.0998	0.0018	613	10	616	13	624	34	0.487013	1.76282	0.487013	613	10	Wang et al. (2020)
13H16A-09	1.35	0.0708	0.0028	1.529	0.0605	0.1567	0.0031	938	17	942	24	950	49	0.424628	1.26316	0.424628	938	17	Wang et al. (2020)
13H16A-10	0.71	0.0568	0.0017	0.5911	0.0174	0.0755	0.0013	469	8	472	11	484	35	0.635593	3.09917	0.635593	469	8	Wang et al. (2020)
13H16A-11	1.38	0.0773	0.0015	2.0252	0.041	0.19	0.0032	1121	17	1124	14	1129	18	0.266904	0.708592	0.708592	1129	18	Wang et al. (2020)
13H16A-12	0.46	0.189	0.0029	13.6577	0.2261	0.5242	0.0088	2717	37	2726	16	2733	13	0.330154	0.585437	0.585437	2733	13	Wang et al. (2020)
13H16A-13	0.67	0.0706	0.0027	1.552	0.0597	0.1594	0.0031	953	17	951	24	946	47	-0.210305	-0.739958	-0.210305	953	17	Wang et al. (2020)
13H16A-14	0.13	0.1531	0.0044	8.6596	0.2543	0.4102	0.0084	2216	39	2303	27	2381	25	3.77768	6.92986	6.92986	2381	25	Wang et al. (2020)
13H16A-15	0.65	0.0743	0.0015	1.7807	0.0381	0.1738	0.003	1033	16	1038	14	1049	20	0.481696	1.52526	1.52526	1049	20	Wang et al. (2020)
13H16A-16	0.73	0.0643	0.0087	0.5034	0.0665	0.0568	0.0022	356	13	414	45	750	217	14.0097	52.5333	14.0097	-	-	Wang et al. (2020)
13H16A-17	0.4	0.0635	0.0024	1.0262	0.0381	0.1171	0.0022	714	13	717	19	726	47	0.41841	1.65289	0.41841	714	13	Wang et al. (2020)
13H16A-18	1.32	0.0606	0.0036	0.8401	0.0491	0.1006	0.0023	618	13	619	27	625	87	0.161551	1.12	0.161551	618	13	Wang et al. (2020)
13H16A-19	0.49	0.1708	0.0025	11.578	0.1875	0.4916	0.0082	2578	35	2571	15	2566	13	-0.272268	-0.467654	-0.467654	2566	13	Wang et al. (2020)
13H16A-20	0.5	0.0551	0.0037	0.5467	0.0361	0.072	0.0017	448	10	443	24	415	106	-1.12867	-7.95181	-1.12867	448	10	Wang et al. (2020)
13H16A-21	1.08	0.0776	0.002	2.037	0.0525	0.1905	0.0034	1124	18	1128	18	1136	25	0.35461	1.05634	1.05634	1136	25	Wang et al. (2020)
13H16A-22	0.52	0.0776	0.0013	2.0413	0.0355	0.1907	0.0032	1125	17	1129	12	1137	16	0.354296	1.05541	1.05541	1137	16	Wang et al. (2020)
13H16A-23	0.62	0.0559	0.002	0.5434	0.0192	0.0705	0.0013	439	8	441	13	448	46	0.453515	2.00893	0.453515	439	8	Wang et al. (2020)
13H16A-24	0.82	0.0551	0.0018	0.5431	0.0181	0.0715	0.0013	445	8	440	12	415	43	-1.13636	-7.22892	-1.13636	445	8	Wang et al. (2020)
13H16A-25	0.77	0.0648	0.0021	1.0964	0.0351	0.1228	0.0023	747	13	752	17	767	38	0.664894	2.60756	0.664894	747	13	Wang et al. (2020)
13H16A-26	1.17	0.1573	0.003	9.9448	0.2019	0.4587	0.0081	2434	36	2430	19	2427	15	-0.164609	-0.288422	-0.288422	2427	15	Wang et al. (2020)
13H16A-27	0.77	0.0589	0.0029	0.7375	0.0355	0.0908	0.0018	560	11	561	21	563	70	0.178253	0.53286	0.178253	560	11	Wang et al. (2020)
13H16A-28	0.48	0.0555	0.0018	0.5456	0.0179	0.0713	0.0013	444	8	442	12	433	42	-0.452489	-2.54042	-0.452489	444	8	Wang et al. (2020)
13H16A-29	0.42	0.2983	0.0051	27.9419	0.5202	0.6795	0.0121	3342	46	3417	18	3461	13	2.19491	3.43831	3.43831	3461	13	Wang et al. (2020)
13H16A-30	0.47	0.0974	0.0017	3.6971	0.068	0.2752	0.0047	1567	24	1571	15	1576	15	0.254615	0.571066	0.571066	1576	15	Wang et al. (2020)
13H16A-31	1.6	0.0723	0.003	1.1633	0.047	0.1167	0.0023	711	13	784	22	995	50	9.31122	28.5427	9.31122	711	13	Wang et al. (2020)
13H16A-32	0.44	0.0552	0.0014	0.543	0.0144	0.0714	0.0012	444	7	440	9	420	30	-0.909091	-5.71429	-0.909091	444	7	Wang et al. (2020)
13H16A-33	0.39	0.071	0.0013	1.5706	0.031	0.1605	0.0027	959	15	959	12	957	18	0	-0.208986	0	959	15	Wang et al. (2020)
13H16A-34	0.77	0.0565	0.0017	0.5927	0.0179	0.0761	0.0014	473	8	473	11	472	36	0	-0.211864	0	473	8	Wang et al. (2020)
13H16A-35	0.78	0.0572	0.002	0.5965	0.0206	0.0757	0.0014	470	8	475	13	497	44	1.05263	5.4326	1.05263	470	8	Wang et al. (2020)
13H16A-36	0.59	0.1796	0.0029	12.644	0.2248	0.5107	0.0087	2660	37	2653	17	2649	13	-0.263852	-0.415251	-0.415251	2649	13	Wang et al. (2020)
13H16A-37	0.39	0.1083	0.0026	4.6917	0.1144	0.3141	0.0057	1761	28	1766	20	1772	21	0.283126	0.620767	0.620767	1772	21	Wang et al. (2020)
13H16A-38	0.9	0.1635	0.0029	10.6931	0.2046	0.4745	0.0083	2503	36	2497	18	2492	14	-0.240288	-0.441413	-0.441413	2492	14	Wang et al. (2020)
13H16A-39	1.18	0.1113	0.0023	4.9858	0.1077	0.3251	0.0057	1815	28	1817	18	1820	18	0.110072	0.274725	0.274725	1820	18	Wang et al. (2020)
13H16A-40	0.78	0.0865	0.0031	2.7944	0.0987	0.2344	0.0047	1358	24	1354	26	1349	38	-0.295421	-0.667161	-0.667161	1349	38	Wang et al. (2020)
13H16A-41	0.55	0.0558	0.002	0.5454	0.0196	0.0709	0.0013	441	8	442	13	445	48	0.226244	0.898876	0.226244	441	8	Wang et al. (2020)
13H16A-42	0.45	0.0698	0.0013	1.5639	0.0314	0.1625	0.0028	970	15	956	12	924	19	-1.46444	-4.97835	-1.46444	970	15	Wang et al. (2020)
13H16A-43	1.08	0.1585	0.0045	10.0348	0.2889	0.4593	0.0094	2436	42	2438	27	2440	24	0.0820345	0.163934	0.163934	2440	24	Wang et al. (2020)
13H16A-44	0.84	0.0568	0.0024	0.589	0.0251	0.0753	0.0015	468	9	470	16	482	60	0.425532	2.90456	0.425532	468	9	Wang et al. (2020)
13H16A-45	0.61	0.0705	0.0027	1.5452	0.0584	0.1591	0.0031	952	17	949	23	942	46	-0.316122	-1.06157	-0.316122	952	17	Wang et al. (2020)
13H16A-46	0.42	0.0646	0.0014	1.0913	0.0244	0.1226	0.0021	745	12	749	12	761	22	0.534045	2.1025	0.534045	745	12	Wang et al. (2020)
13H16A-47	0.53	0.0557	0.0033	0.5441	0.0319	0.0708	0.0015	441	9	441	21	442	91	0	0.226244	0	441	9	Wang et al. (2020)
13H16A-48	0.44	0.0563	0.0018	0.5485	0.0173	0.0707	0.0013	440	8	444	11	464	39	0.900901	5.17241	0.900901	440	8	Wang et al. (2020)
13H16A-49	0.86	0.0556	0.0018	0.5413	0.018	0.0706	0.0013	440	8	439	12	438	43	-0.22779	-0.456621	-0.22779	440	8	Wang et al. (2020)
13H16A-50	1.03	0.099	0.0018	3.8493	0.0739	0.2821	0.0048	1602	24	1603	15	1605	16	0.062383	0.186916	0.186916	1605	16	Wang et al. (2020)
13H16A-51	0.18	0.1689	0.0027	11.2249	0.1959	0.4821	0.0082	2536	36	2542	16	2547	13	0.236035	0.431881	0.431881	2547	13	Wang et al. (2020)
13H16A-52	0.4	0.1876	0.0035	13.5134	0.2707	0.5226	0.0093	2710	40	2716	19	2721	15	0.220913	0.404263	0.404263	2721	15	Wang et al. (2020)
13H16A-53	1.32	0.1632	0.0026	10.6496	0.1875	0.4734	0.0081	2498	35	2493	16	2489	13	-0.200562	-0.361591	-0.361591	2489	13	Wang et al. (2020)
13H16A-54	0.6	0.0602	0.002	0.4498	0.0153	0.0542	0.001	341	6	377	11	609	42	9.54907	44.0066	9.54907	341	6	Wang et al. (2020)
13H16A-55	0.14	0.0603	0.0017	0.8332	0.0233	0.1002	0.0018	616	10	615	13	615	32	-0.162602	-0.162602	-0.162602	616	10	Wang et al. (2020)
13H16A-56	0.57	0.0548	0.0023	0.4156	0.0172	0.0551	0.0011	346	6	353	12	402	59	1.983	13.9303	1.983	346	6	Wang et al. (2020)
13H16A-57	0.4	0.0563	0.0036	0.5519	0.0345	0.0712	0.0016	443	10	446	23	463	99	0.672646	4.31965	0.672646	443	10	Wang et al. (2020)
13H16A-58	0.25	0.065	0.0012	1.1333	0.0222	0.1265	0.0022	768	12	769	11	774	18	0.130039	0.775194	0.130039	768	12	Wang et al. (2020)
13H16A-59	0.46	0.056	0.0027	0.5365	0.0257	0.0695	0.0014	433	8	436	17	453	70	0.688073	4.41501	0.688073	433	8	Wang et al. (2020)
13H16A-60	0.63	0.0718	0.0034	1.5534	0.0721	0.157	0.0033	940	18	952	29	979	60	1.2605	3.98366	1.2605	940	18	Wang et al. (2020)
13H16A-61	0.74	0.0553	0.0042	0.5356	0.0395	0.0703	0.0017	438	10	436	26	424	121	-0.458716	-3.30189	-0.458716	438	10	Wang et al. (2020)
13H16A-62	0.65	0.0648	0.0028	1.0954	0.0471	0.1226	0.0025	745	14	751	23	768	57	0.798935	2.99479	0.798935	745	14	Wang et al. (2020)
13H16A-63	1.46	0.0706	0.0038	1.5327	0.0811	0.1575	0.0035	943	20	944	33	945	72	0.105932	0.21164	0.105932	943	20	Wang et al. (2020)
13H16A-64	0.58	0.0657	0.002	0.5001	0.0152	0.0552	0.001	346	6	412	10	797	35	16.0194	56.5872	16.0194	-	-	Wang et al. (2020)
13H16A-65	0.69	0.0565	0.0016	0.5919	0.017	0.0759	0.0014	472	8	472	11	474	34	0	0.421941	0	472	8	Wang et al. (2020)
13H16A-66	0.38	0.1083	0.002	4.5372	0.09	0.3038	0.0053	1710	26	1738	17	1772	16	1.61105	3.49887	3.49887	1772	16	Wang et al. (2020)
13H16A-67	0.56	0.0674	0.0034	1.2939	0.0653	0.1393	0.003	841	17	843	29	849	69	0.237248	0.942285	0.237248	841	17	Wang et al. (2020)
13H16A-68	0.67	0.0845	0.0015	2.6313	0.0496	0.2258	0.0039	1313	20	1309	14	1304	16	-0.305577	-0.690184	-0.690184	1304	16	Wang et al. (2020)
13H16A-69	1.02	0.0572	0.0017	0.594	0.0181	0.0754	0.0014	468	8	473	12	498	37	1.05708	6.0241	1.05708	468	8	Wang et al. (2020)
13H16A-70	0.28	0.0634	0.0036	1.0262	0.0574	0.1173	0.0026	715	15	717	29	723	81	0.27894	1.1065	0.27894	715	15	Wang et al. (2020)
13H16A-71	0.62	0.057	0.0037	0.5923	0.0374	0.0753	0.0017	468	10	472	24	493	99	0.847458	5.07099	0.847458	468	10	Wang et al. (2020)
13H16A-72	0.06	0.0676	0.0021	1.2905	0.0404	0.1385	0.0026	836	14	842	18	856	36	0.712589	2.33645	0.712589	836	14	Wang et al. (2020)
13H16B-01	0.97	0.0539	0.0012	0.5184	0.0113	0.0696	0.0007	434	4	424	8	366	32	-2.35849	-18.5792	-2.35849	434	4	Wang et al. (2020)
13H16B-02	0.68	0.0563	0.0017	0.5436	0.0181	0.07	0.0011	436	7	441	12	464	45	1.13379	6.03448	1.13379	436	7	Wang et al. (2020)
13H16B-03	0.54	0.058	0.0102	0.7078	0.0924	0.0902	0.0045	557	27	543	55	529	200	-2.57827	-5.29301	-2.57827	557	27	Wang et al. (2020)
13H16B-04	0.52	0.0584	0.0025	0.5528	0.0248	0.0684	0.0011	427	6	447	16	545	71	4.47427	21.6514	4.47427	427	6	Wang et al. (2020)
13H16B-05	0.59	0.0971	0.0013	3.7008	0.0557	0.2761	0.0032	1572	16	1572	12	1569	13	0	-0.191205	-0.191205	1569	13	Wang et al. (2020)
13H16B-06	1.08	0.0552	0.0026	0.4072	0.0199	0.0533	0.0008	335	5	347	14	421	81	3.45821	20.4276	3.45821	335	5	Wang et al. (2020)
13H16B-07	0.81	0.0565	0.0015	0.5444	0.0141	0.07	0.001	436	6	441	9	474	32	1.13379	8.01688	1.13379	436	6	Wang et al. (2020)
13H16B-08	0.58	0.0704	0.0016	1.5588	0.0566	0.1598	0.0032	956	18	954	22	939	43	-0.209644	-1.81044	-0.209644	956	18	Wang et al. (2020)
13H16B-09	0.68	0.0557	0.0011	0.5368	0.0096	0.0701	0.0008	437	5	436	6	440	21	-0.229358	0.681818	-0.229358	437	5	Wang et al. (2020)
13H16B-10	0.96	0.0699	0.0026	1.4626	0.0484	0.1526	0.0049	915	28	915	20	925	31	0	1.08108	0	915	28	Wang et al. (2020)
13H16B-11	0.58	0.064	0.0021	1.1015	0.0348	0.1245	0.0013	756	8	754	17	742	49	-0.265252	-1.88679	-0.265252	756	8	Wang et al. (2020)
13H16B-12	0.42	0.0561	0.0017	0.5383	0.0155	0.0698	0.0009	435	5	437	10	456	42	0.457666	4.60526	0.457666	435	5	Wang et al. (2020)
13H16B-13	0.19	0.1124	0.0015	5.0814	0.0898	0.327	0.0048	1824	23	1833	15	1838	14	0.490998	0.761697	0.761697	1838	14	Wang et al. (2020)
13H16B-14	1.33	0.0621	0.0014	0.7764	0.0209	0.0905	0.0013	559	8	583	12	676	34	4.11664	17.3077	4.11664	559	8	Wang et al. (2020)
13H16B-15	0.65	0.0692	0.0043	1.1826	0.0466	0.126	0.0074	765	43	793	22	904	61	3.5309	15.3761	3.5309	765	43	Wang et al. (2020)
13H16B-16	1.14	0.0585	0.001	0.734	0.016	0.0907	0.0013	560	8	559	9	549	24	-0.178891	-2.00364	-0.178891	560	8	Wang et al. (2020)
13H16B-17	0.36	0.0764	0.001	1.9248	0.0508	0.1826	0.0046	1081	25	1090	18	1105	24	0.825688	2.17195	2.17195	1105	24	Wang et al. (2020)
13H16B-18	0.84	0.0541	0.001	0.5286	0.0113	0.0708	0.0012	441	7	431	7	376	22	-2.32019	-17.2872	-2.32019	441	7	Wang et al. (2020)
13H16B-19	1.05	0.0524	0.0019	0.5021	0.0167	0.0694	0.0014	432	8	413	11	303	41	-4.60048	-42.5743	-4.60048	432	8	Wang et al. (2020)
13H16B-20	0.73	0.0525	0.0024	0.4046	0.0178	0.0557	0.001	349	6	345	13	308	68	-1.15942	-13.3117	-1.15942	349	6	Wang et al. (2020)
13H16B-21	0.4	0.0505	0.0018	0.4858	0.0175	0.0694	0.0011	432	7	402	12	217	54	-7.46269	-99.0783	-7.46269	432	7	Wang et al. (2020)
13H16B-22	0.56	0.0629	0.004	1.1366	0.0818	0.1299	0.0061	787	35	771	39	705	79	-2.07523	-11.6312	-2.07523	787	35	Wang et al. (2020)
13H16B-23	0.41	0.0702	0.0041	1.5632	0.094	0.1597	0.0042	955	23	956	37	934	80	0.104603	-2.24839	0.104603	955	23	Wang et al. (2020)
13H16B-24	0.03	0.0532	0.0039	0.6658	0.0468	0.0903	0.0017	557	10	518	29	335	125	-7.52896	-66.2687	-7.52896	557	10	Wang et al. (2020)
13H16B-25	0.96	0.0565	0.0043	0.7127	0.0513	0.0911	0.0018	562	11	546	30	473	124	-2.9304	-18.8161	-2.9304	562	11	Wang et al. (2020)
13H16B-26	0.67	0.0504	0.0031	0.4898	0.0294	0.0702	0.0019	437	11	405	20	212	90	-7.90123	-106.132	-7.90123	437	11	Wang et al. (2020)
13H16B-27	0.16	0.0567	0.003	0.7096	0.0343	0.0902	0.0017	557	10	544	20	478	73	-2.38971	-16.5272	-2.38971	557	10	Wang et al. (2020)
13H16B-28	0.38	0.0985	0.0045	3.8059	0.1547	0.2812	0.0079	1597	40	1594	33	1597	38	-0.188206	0	0	1597	38	Wang et al. (2020)
13H16B-29	0.74	0.0554	0.0027	0.4317	0.017	0.0565	0.0023	354	14	364	12	429	41	2.74725	17.4825	2.74725	354	14	Wang et al. (2020)
13H16B-30	0.76	0.0709	0.0025	1.5635	0.0669	0.1595	0.0053	954	29	956	26	954	41	0.209205	0	0.209205	954	29	Wang et al. (2020)
13H16B-31	0.83	0.0552	0.0015	0.5286	0.0157	0.0693	0.001	432	6	431	10	421	41	-0.232019	-2.61283	-0.232019	432	6	Wang et al. (2020)
13H16B-32	0.4	0.0789	0.0027	2.0852	0.0542	0.1915	0.0039	1129	21	1144	18	1171	24	1.31119	3.58668	3.58668	1171	24	Wang et al. (2020)
13H16B-33	0.65	0.0555	0.0015	0.5363	0.016	0.07	0.0013	436	8	436	11	434	36	0	-0.460829	0	436	8	Wang et al. (2020)
13H16B-34	0.91	0.0566	0.0013	0.546	0.013	0.0699	0.0009	436	5	442	9	476	31	1.35747	8.40336	1.35747	436	5	Wang et al. (2020)
13H16B-35	0.85	0.0571	0.0015	0.4404	0.0184	0.0556	0.0017	349	10	371	13	496	44	5.92992	29.6371	5.92992	349	10	Wang et al. (2020)
13H16B-36	0.52	0.0726	0.002	1.6277	0.0329	0.1631	0.0031	974	17	981	13	1002	18	0.713558	2.79441	0.713558	974	17	Wang et al. (2020)
13H16B-37	0.67	0.0568	0.0014	0.5432	0.0143	0.0692	0.0013	431	8	440	9	485	28	2.04545	11.134	2.04545	431	8	Wang et al. (2020)
13H16B-38	0.42	0.0548	0.0019	0.6934	0.0232	0.0916	0.0027	565	16	535	14	405	34	-5.60748	-39.5062	-5.60748	565	16	Wang et al. (2020)
13H16B-39	0.83	0.0707	0.0015	1.5772	0.0328	0.161	0.0018	962	10	961	13	947	24	-0.104058	-1.58395	-0.104058	962	10	Wang et al. (2020)
13H16B-40	0.56	0.2893	0.0046	28.1767	0.5689	0.7003	0.0114	3422	43	3425	20	3414	14	0.0875912	-0.234329	-0.234329	3414	14	Wang et al. (2020)
13H16B-41	0.42	0.0535	0.0039	0.4389	0.0307	0.0595	0.0012	372	7	370	22	351	168	-0.540541	-5.98291	-0.540541	372	7	Wang et al. (2020)
13H16B-42	0.53	0.161	0.0031	10.4395	0.2251	0.4654	0.0093	2463	41	2475	20	2466	16	0.484848	0.121655	0.121655	2466	16	Wang et al. (2020)
13H16B-43	0.93	0.0535	0.0013	0.5154	0.0107	0.0695	0.001	433	6	422	7	348	23	-2.60664	-24.4253	-2.60664	433	6	Wang et al. (2020)
13H16B-44	0.43	0.0565	0.0013	0.5479	0.0131	0.0695	0.0009	433	5	444	9	473	30	2.47748	8.45666	2.47748	433	5	Wang et al. (2020)
13H16B-45	0.67	0.0539	0.0012	0.5248	0.0132	0.07	0.001	436	6	428	9	366	31	-1.86916	-19.1257	-1.86916	436	6	Wang et al. (2020)
13H16B-46	0.56	0.0562	0.0011	0.5472	0.0121	0.0704	0.0012	438	7	443	8	458	23	1.12867	4.36681	1.12867	438	7	Wang et al. (2020)
13H16B-47	0.81	0.0515	0.0018	0.4994	0.0202	0.0699	0.0018	436	11	411	14	263	49	-6.08273	-65.7795	-6.08273	436	11	Wang et al. (2020)
13H16B-48	0.92	0.0637	0.0018	1.0955	0.0381	0.1244	0.0031	756	18	751	18	732	36	-0.665779	-3.27869	-0.665779	756	18	Wang et al. (2020)
13H16B-49	0.62	0.1305	0.0025	6.9674	0.2032	0.3866	0.0114	2107	53	2107	26	2104	24	0	-0.142586	-0.142586	2104	24	Wang et al. (2020)
13H16B-50	0.37	0.0692	0.0015	1.4853	0.0592	0.1545	0.0053	926	29	924	24	906	37	-0.21645	-2.20751	-0.21645	926	29	Wang et al. (2020)
13H16B-51	0.69	0.0753	0.0013	1.8759	0.0396	0.1804	0.0032	1069	17	1073	14	1075	19	0.372787	0.55814	0.55814	1075	19	Wang et al. (2020)
13H16B-52	0.55	0.0642	0.0018	1.1181	0.0487	0.1261	0.0054	766	31	762	23	748	42	-0.524934	-2.40642	-0.524934	766	31	Wang et al. (2020)
13H16B-53	0.04	0.0702	0.0018	1.5382	0.0735	0.1568	0.0042	939	24	946	29	934	55	0.739958	-0.535332	0.739958	939	24	Wang et al. (2020)
13H16B-54	0.92	0.0649	0.0018	1.1443	0.0407	0.1276	0.0036	774	21	775	19	771	34	0.129032	-0.389105	0.129032	774	21	Wang et al. (2020)
13H16B-55	0.96	0.0535	0.0013	0.5147	0.0142	0.0695	0.0011	433	7	422	10	350	35	-2.60664	-23.7143	-2.60664	433	7	Wang et al. (2020)
13H16B-56	1.2	0.1561	0.0023	9.81	0.1756	0.4555	0.0084	2420	37	2417	16	2414	14	-0.124121	-0.24855	-0.24855	2414	14	Wang et al. (2020)
13H16B-57	0.12	0.0684	0.0009	1.4671	0.0289	0.1551	0.0025	930	14	917	12	880	19	-1.41767	-5.68182	-1.41767	930	14	Wang et al. (2020)
13H16B-58	0.68	0.0523	0.0022	0.4961	0.0218	0.0691	0.0026	431	16	409	15	297	45	-5.37897	-45.1178	-5.37897	431	16	Wang et al. (2020)
13H16B-59	0.62	0.0707	0.003	1.5343	0.0732	0.1574	0.0042	942	23	944	29	950	55	0.211864	0.842105	0.211864	942	23	Wang et al. (2020)
13H16B-60	0.51	0.0569	0.0026	0.5487	0.0323	0.0697	0.0023	434	14	444	21	489	74	2.25225	11.2474	2.25225	434	14	Wang et al. (2020)
Site 21: Xiangshan, Hancheng
Sample	Th/U	207Pb/206Pb	Error	207Pb/235U	Error	206Pb/238U	Error	238U-206Pb date	Error	235U-207Pb date	Error	207Pb-206Pb date	Error	Discordance 1 (238U–206Pb vs 235U–207Pb)	Discordance 2 (238U–206Pb vs 207Pb–206Pb)	Discordance	Preferred Age	Error	Data source
Name			1σ		1σ		1σ	(Ma)	1σ	(Ma)	1σ	(Ma)	1σ	(%)	(%)	(%)	(Ma)	1σ
N2‑1	0.87	0.056723	0.000862	0.493694	0.007841	0.063033	0.000495	394	3	407.4	5.3	479.7	33.3	3.28915	17.8653	3.28915	394	3	Jia et al. (2019)
N2‑2	0.89	0.05789	0.000755	0.693569	0.009692	0.086561	0.000617	535.2	3.7	534.9	5.8	524.1	27.8	-0.0560852	-2.11792	-0.0560852	535.2	3.7	Jia et al. (2019)
N2‑3	0.53	0.055275	0.00121	0.556798	0.01245	0.072907	0.000625	453.6	3.8	449.4	8.1	433.4	50	-0.934579	-4.66082	-0.934579	453.6	3.8	Jia et al. (2019)
N2‑4	0.71	0.054221	0.001057	0.546092	0.010627	0.073196	0.000559	455.4	3.4	442.4	7	388.9	44.4	-2.93852	-17.0995	-2.93852	455.4	3.4	Jia et al. (2019)
N2‑5	0.65	0.05527	0.001149	0.560434	0.011628	0.073698	0.000593	458.4	3.6	451.8	7.6	433.4	50.9	-1.46082	-5.76834	-1.46082	458.4	3.6	Jia et al. (2019)
N2‑6	0.7	0.057141	0.001327	0.540121	0.011964	0.06908	0.000635	430.6	3.8	438.5	7.9	498.2	45.4	1.8016	13.5688	1.8016	430.6	3.8	Jia et al. (2019)
N2‑7	0.68	0.059224	0.001673	0.555882	0.014181	0.069268	0.000665	431.7	4	448.8	9.3	576	56.5	3.81016	25.0521	3.81016	431.7	4	Jia et al. (2019)
N2‑8	1.08	0.056644	0.000963	0.54355	0.009055	0.069328	0.000512	432.1	3.1	440.8	6	476	41.7	1.97368	9.22269	1.97368	432.1	3.1	Jia et al. (2019)
N2‑9	0.69	0.05742	0.000733	0.553975	0.007208	0.069866	0.000508	435.4	3.1	447.6	4.7	509.3	60.2	2.72565	14.5101	2.72565	435.4	3.1	Jia et al. (2019)
N2‑10	0.7	0.055401	0.000872	0.554506	0.008888	0.072522	0.000561	451.3	3.4	447.9	5.8	427.8	35.2	-0.759098	-5.49322	-0.759098	451.3	3.4	Jia et al. (2019)
N2‑11	0.74	0.055717	0.000775	0.545668	0.008059	0.070704	0.000498	440.4	3	442.2	5.3	442.6	31.5	0.407056	0.497063	0.407056	440.4	3	Jia et al. (2019)
N2‑12	0.19	0.056591	0.000928	0.548744	0.009384	0.070313	0.000608	438	3.7	444.2	6.2	476	41.7	1.39577	7.98319	1.39577	438	3.7	Jia et al. (2019)
N2‑13	0.68	0.055311	0.000721	0.543879	0.007369	0.071154	0.000544	443.1	3.3	441	4.9	433.4	29.6	-0.47619	-2.23812	-0.47619	443.1	3.3	Jia et al. (2019)
N2‑14	0.57	0.056017	0.001326	0.549057	0.01281	0.071473	0.000699	445	4.2	444.4	8.4	453.8	53.7	-0.135014	1.93918	-0.135014	445	4.2	Jia et al. (2019)
N2‑15	0.54	0.05778	0.001134	0.580305	0.012222	0.07247	0.000632	451	3.8	464.7	7.9	520.4	44.4	2.94814	13.3359	2.94814	451	3.8	Jia et al. (2019)
N2‑16	0.7	0.055525	0.000805	0.554603	0.008546	0.072305	0.000525	450	3.2	448	5.6	435.2	0.9	-0.446429	-3.40074	-0.446429	450	3.2	Jia et al. (2019)
N2‑17	0.62	0.058289	0.00165	0.571389	0.016855	0.071431	0.000723	444.8	4.4	458.9	10.9	538.9	67.6	3.07256	17.4615	3.07256	444.8	4.4	Jia et al. (2019)
N2‑18	0.63	0.055614	0.001191	0.547869	0.012352	0.071501	0.000678	445.2	4.1	443.6	8.1	435.2	48.1	-0.360685	-2.29779	-0.360685	445.2	4.1	Jia et al. (2019)
N2‑19	0.57	0.054841	0.000845	0.541857	0.008588	0.071787	0.000608	446.9	3.7	439.6	5.7	405.6	33.3	-1.6606	-10.1824	-1.6606	446.9	3.7	Jia et al. (2019)
N2‑20	0.72	0.056795	0.000912	0.563452	0.009324	0.072067	0.000677	448.6	4.1	453.8	6.1	483.4	32.4	1.14588	7.19901	1.14588	448.6	4.1	Jia et al. (2019)
N2‑21	0.75	0.055808	0.000957	0.551678	0.009676	0.071664	0.000628	446.2	3.8	446.1	6.3	455.6	38.9	-0.0224165	2.06321	-0.0224165	446.2	3.8	Jia et al. (2019)
N2‑22	0.81	0.053457	0.001125	0.52156	0.011228	0.070916	0.000654	441.7	3.9	426.2	7.5	350.1	48.1	-3.63679	-26.164	-3.63679	441.7	3.9	Jia et al. (2019)
N2‑23	0.9	0.057011	0.001263	0.554646	0.012702	0.070597	0.000644	439.8	3.9	448	8.3	500	48.1	1.83036	12.04	1.83036	439.8	3.9	Jia et al. (2019)
N2‑24	0.7	0.05516	0.000937	0.538771	0.009143	0.071048	0.000616	442.5	3.7	437.6	6	420.4	34.3	-1.11974	-5.2569	-1.11974	442.5	3.7	Jia et al. (2019)
N2‑25	0.78	0.057276	0.001184	0.563912	0.011272	0.071415	0.000585	444.7	3.5	454.1	7.3	501.9	44.4	2.07003	11.3967	2.07003	444.7	3.5	Jia et al. (2019)
N2‑26	0.5	0.056001	0.001287	0.55215	0.011997	0.072112	0.00063	448.9	3.8	446.4	7.9	453.8	17.6	-0.560036	1.07977	-0.560036	448.9	3.8	Jia et al. (2019)
N2‑27	0.52	0.054764	0.000972	0.540305	0.009352	0.071663	0.000534	446.2	3.2	438.6	6.2	466.7	40.7	-1.73279	4.39254	-1.73279	446.2	3.2	Jia et al. (2019)
N2‑28	0.55	0.054973	0.000774	0.543784	0.007923	0.071487	0.000495	445.1	3	440.9	5.2	409.3	26.9	-0.952597	-8.74664	-0.952597	445.1	3	Jia et al. (2019)
N2‑29	0.81	0.055255	0.001051	0.53767	0.010584	0.070392	0.000539	438.5	3.3	436.9	7	433.4	38	-0.366217	-1.17674	-0.366217	438.5	3.3	Jia et al. (2019)
N2‑30	0.72	0.054852	0.001138	0.534173	0.011267	0.070743	0.000574	440.6	3.5	434.6	7.5	405.6	43.5	-1.38058	-8.62919	-1.38058	440.6	3.5	Jia et al. (2019)
N2‑31	0.16	0.060165	0.000858	0.817141	0.011713	0.098432	0.000721	605.2	4.2	606.5	6.6	609.3	25	0.214345	0.672903	0.214345	605.2	4.2	Jia et al. (2019)
N2‑32	0.54	0.061137	0.001093	0.849937	0.01565	0.10072	0.000774	618.6	4.5	624.6	8.6	642.6	38.9	0.960615	3.73483	0.960615	618.6	4.5	Jia et al. (2019)
N2‑33	0.98	0.062424	0.001108	0.909214	0.016398	0.105785	0.000818	648.2	4.8	656.6	8.7	688.6	38.9	1.27932	5.86698	1.27932	648.2	4.8	Jia et al. (2019)
N2‑34	1	0.063859	0.001235	1.04453	0.020147	0.118849	0.000947	723.9	5.5	726.2	10	736.7	41.5	0.316717	1.73748	0.316717	723.9	5.5	Jia et al. (2019)
N2‑35	0.77	0.066169	0.000997	1.18318	0.018031	0.129982	0.001199	787.8	6.9	792.8	8.4	813	26.9	0.630676	3.09963	0.630676	787.8	6.9	Jia et al. (2019)
N2‑36	1.28	0.066824	0.001002	1.20616	0.018391	0.131392	0.001144	795.8	6.5	803.4	8.5	831.5	167.6	0.94598	4.29345	0.94598	795.8	6.5	Jia et al. (2019)
N2‑37	0.45	0.064288	0.00137	1.17634	0.025497	0.133029	0.001199	805.1	6.8	789.6	11.9	750	44.4	-1.96302	-7.34667	-1.96302	805.1	6.8	Jia et al. (2019)
N2‑38	1.32	0.064291	0.000783	1.1858	0.015057	0.13357	0.001016	808.2	5.8	794	7	750	25.9	-1.78841	-7.76	-1.78841	808.2	5.8	Jia et al. (2019)
N2‑39	1.36	0.066393	0.000862	1.23218	0.018792	0.13405	0.001262	810.9	7.2	815.3	8.6	820.4	32.4	0.539679	1.15797	0.539679	810.9	7.2	Jia et al. (2019)
N2‑40	0.88	0.065394	0.000633	1.21534	0.013992	0.134052	0.000996	810.9	5.7	807.6	6.4	787	20.4	-0.408618	-3.03685	-0.408618	810.9	5.7	Jia et al. (2019)
N2‑41	0.25	0.070026	0.000669	1.36428	0.014931	0.140777	0.001111	849.1	6.3	873.7	6.4	929.3	20.4	2.81561	8.63015	2.81561	849.1	6.3	Jia et al. (2019)
N2‑42	0.7	0.071703	0.001657	1.39458	0.030176	0.142133	0.001407	856.7	8	886.6	12.8	977.5	50.9	3.37243	12.3581	3.37243	856.7	8	Jia et al. (2019)
N2‑43	0.03	0.069628	0.000711	1.415	0.017815	0.146831	0.001249	883.2	7	895.3	7.5	916.7	21.4	1.3515	3.65441	1.3515	883.2	7	Jia et al. (2019)
N2‑44	0.31	0.06818	0.000801	1.41576	0.017995	0.150364	0.001216	903	6.8	895.6	7.6	873.8	24.1	-0.826262	-3.34173	-0.826262	903	6.8	Jia et al. (2019)
N2‑45	0.47	0.072002	0.000766	1.59151	0.017618	0.159972	0.001114	956.6	6.2	966.9	6.9	987	22.2	1.06526	3.08004	1.06526	956.6	6.2	Jia et al. (2019)
N2‑46	0.3	0.071716	0.000895	1.60892	0.030707	0.160848	0.001996	961.5	11.1	973.7	12	988.9	24.8	1.25295	2.77076	1.25295	961.5	11.1	Jia et al. (2019)
N2‑47	0.3	0.071796	0.000704	1.60575	0.016933	0.161626	0.001105	965.8	6.2	972.5	6.6	988.9	25	0.688946	2.33593	0.688946	965.8	6.2	Jia et al. (2019)
N2‑48	0.57	0.072327	0.000736	1.62358	0.018457	0.162164	0.00122	968.8	6.8	979.4	7.2	994.4	20.4	1.0823	2.57442	1.0823	968.8	6.8	Jia et al. (2019)
N2‑49	0.49	0.071267	0.000818	1.6542	0.020387	0.167646	0.001207	999.1	6.7	991.2	7.8	964.8	23	-0.797014	-3.55514	-0.797014	999.1	6.7	Jia et al. (2019)
N2‑50	0.58	0.071501	0.000709	1.68319	0.020129	0.169964	0.001475	1011.9	8.1	1002.2	7.6	972.2	20.1	-0.967871	-4.08352	-4.08352	972.2	20.1	Jia et al. (2019)
N2‑51	0.28	0.076623	0.001243	1.85342	0.03125	0.175088	0.001456	1040.1	8	1064.6	11.1	1122.2	31.9	2.30133	7.31599	7.31599	1122.2	31.9	Jia et al. (2019)
N2‑52	0.49	0.073524	0.000792	1.81537	0.020471	0.178447	0.001195	1058.5	6.6	1051	7.4	1027.8	21.8	-0.713606	-2.98696	-2.98696	1027.8	21.8	Jia et al. (2019)
N2‑53	0.43	0.076453	0.000797	1.90531	0.021808	0.179982	0.001275	1066.9	7	1082.9	7.7	1107.1	20.4	1.47751	3.63111	3.63111	1107.1	20.4	Jia et al. (2019)
N2‑54	1.18	0.075301	0.000711	1.8819	0.02054	0.180456	0.001314	1069.5	7.2	1074.7	7.3	1075.9	19	0.483856	0.594851	0.594851	1075.9	19	Jia et al. (2019)
N2‑55	0.2	0.075425	0.000749	1.93568	0.021764	0.185584	0.001445	1097.4	7.9	1093.5	7.6	1079.6	19.3	-0.356653	-1.64876	-1.64876	1079.6	19.3	Jia et al. (2019)
N2‑56	0.67	0.075226	0.000998	1.92959	0.0266	0.185849	0.001458	1098.9	7.9	1091.4	9.2	1075.9	27	-0.687191	-2.13775	-2.13775	1075.9	27	Jia et al. (2019)
N2‑57	0.49	0.076727	0.000784	1.97302	0.022259	0.186159	0.001548	1100.5	8.4	1106.3	7.6	1113.9	25	0.52427	1.20298	1.20298	1113.9	25	Jia et al. (2019)
N2‑58	1.33	0.090669	0.001022	2.49816	0.030522	0.199244	0.001433	1171.3	7.7	1271.5	8.9	1439.8	21.5	7.88046	18.6484	18.6484	-	-	Jia et al. (2019)
N2‑59	1.84	0.079674	0.00126	2.1969	0.035343	0.200469	0.001753	1177.8	9.4	1180.1	11.3	1190.7	26.8	0.194899	1.0834	1.0834	1190.7	26.8	Jia et al. (2019)
N2‑60	0.67	0.083663	0.000838	2.58823	0.028208	0.223903	0.001759	1302.5	9.3	1297.3	8	1284.9	20.4	-0.400832	-1.36976	-1.36976	1284.9	20.4	Jia et al. (2019)
N2‑61	1.55	0.091506	0.001149	3.22169	0.041574	0.254793	0.001895	1463.1	9.8	1462.4	10	1457.4	23.8	-0.0478665	-0.391107	-0.391107	1457.4	23.8	Jia et al. (2019)
N2‑62	0.75	0.09352	0.001227	3.43975	0.045798	0.266711	0.001921	1524.1	9.8	1513.5	10.5	1498.5	25.5	-0.700363	-1.70838	-1.70838	1498.5	25.5	Jia et al. (2019)
N2‑63	0.45	0.103522	0.00109	3.85072	0.043544	0.268885	0.001834	1535.1	9.4	1603.4	9.2	1688	20.2	4.2597	9.05806	9.05806	1688	20.2	Jia et al. (2019)
N2‑64	0.71	0.096816	0.001169	3.68743	0.046137	0.275469	0.001862	1568.5	9.4	1568.7	10.1	1564.8	22.2	0.0127494	-0.236452	-0.236452	1564.8	22.2	Jia et al. (2019)
N2‑65	1.19	0.100634	0.001304	3.90842	0.052301	0.281434	0.002191	1598.6	11.1	1615.4	10.9	1636.1	24.1	1.03999	2.29204	2.29204	1636.1	24.1	Jia et al. (2019)
N2‑66	0.22	0.100418	0.00087	3.97267	0.045855	0.28684	0.00289	1625.7	14.5	1628.6	9.4	1631.8	15.6	0.178067	0.37382	0.37382	1631.8	15.6	Jia et al. (2019)
N2‑67	0.69	0.097278	0.000966	3.86309	0.043934	0.287039	0.002284	1626.7	11.5	1606	9.2	1572.5	18.5	-1.28892	-3.44674	-3.44674	1572.5	18.5	Jia et al. (2019)
N2‑68	0.79	0.106451	0.001155	4.63621	0.050268	0.315417	0.002058	1767.3	10.1	1755.8	9.1	1739.8	20.4	-0.654972	-1.58064	-1.58064	1739.8	20.4	Jia et al. (2019)
N2‑69	0.82	0.111185	0.001569	5.0029	0.071196	0.326765	0.002607	1822.7	12.7	1819.8	12.1	1820.4	24.8	-0.159358	-0.126346	-0.126346	1820.4	24.8	Jia et al. (2019)
N2‑70	0.52	0.114106	0.001437	5.15731	0.068971	0.327781	0.002786	1827.6	13.6	1845.6	11.4	1865.7	22.8	0.975293	2.04213	2.04213	1865.7	22.8	Jia et al. (2019)
N2‑71	0.69	0.109011	0.001331	4.9407	0.061525	0.327939	0.002307	1828.4	11.2	1809.2	10.6	1783.3	22.2	-1.06124	-2.52902	-2.52902	1783.3	22.2	Jia et al. (2019)
N2‑72	0.69	0.112277	0.001154	5.08086	0.056729	0.327984	0.002746	1828.6	13.4	1832.9	9.6	1836.7	18.8	0.234601	0.441008	0.441008	1836.7	18.8	Jia et al. (2019)
N2‑73	0.55	0.10687	0.001056	4.85261	0.054619	0.328093	0.002397	1829.1	11.7	1794.1	9.6	1746.6	17.9	-1.95084	-4.72346	-4.72346	1746.6	17.9	Jia et al. (2019)
N2‑74	0.95	0.113501	0.001977	5.11974	0.093611	0.328098	0.003424	1829.2	16.6	1839.4	15.6	1857.4	31.5	0.554529	1.51825	1.51825	1857.4	31.5	Jia et al. (2019)
N2‑75	0.56	0.149305	0.001373	8.9453	0.095899	0.432494	0.003293	2317	14.9	2332.4	9.9	2338.9	15.7	0.660264	0.936338	0.936338	2338.9	15.7	Jia et al. (2019)
N2‑76	0.72	0.149721	0.001547	9.06559	0.103057	0.438068	0.003519	2342	15.8	2344.6	10.5	2342.9	18.1	0.110893	0.0384139	0.0384139	2342.9	18.1	Jia et al. (2019)
N2‑77	0.74	0.161924	0.001614	9.84498	0.106553	0.439145	0.002997	2346.8	13.5	2420.4	10.1	2475.6	16.7	3.04082	5.20278	5.20278	2475.6	16.7	Jia et al. (2019)
N2‑78	0.42	0.181694	0.001322	12.3424	0.103604	0.490737	0.003192	2573.9	13.9	2630.8	8.1	2668.2	11.6	2.16284	3.53422	3.53422	2668.2	11.6	Jia et al. (2019)
Site 22: Huating, Pingliang
Sample	Th/U	207Pb/206Pb	Error	207Pb/235U	Error	206Pb/238U	Error	238U-206Pb date	Error	235U-207Pb date	Error	207Pb-206Pb date	Error	Discordance 1 (238U–206Pb vs 235U–207Pb)	Discordance 2 (238U–206Pb vs 207Pb–206Pb)	Discordance	Preferred Age	Error	Data source
Name			1σ		1σ		1σ	(Ma)	1σ	(Ma)	1σ	(Ma)	1σ	(%)	(%)	(%)	(Ma)	1σ
DTZ-2-1	0.510249	0.06706	0.0032	0.78363	0.03045	0.08472	0.00144	524.2	8.55	587.6	17.33	839.7	96.32	10.7897	37.5729	10.7897	-	-	Cai et al. (2015)
DTZ-2-2	0.564209	0.05715	0.00238	0.36754	0.01149	0.04663	0.00071	293.8	4.36	317.8	8.53	496.7	89.6	7.55192	40.8496	7.55192	293.8	4.36	Cai et al. (2015)
DTZ-2-3	0.786498	0.06471	0.00283	0.60907	0.02073	0.06824	0.0011	425.5	6.62	483	13.08	765	89.69	11.9048	44.3791	11.9048	-	-	Cai et al. (2015)
DTZ-2-4	0.889644	0.16206	0.0054	10.1843	0.20837	0.45567	0.00746	2420.4	33.04	2451.7	18.92	2477.3	55.12	1.27667	2.29686	2.29686	2477.3	55.12	Cai et al. (2015)
DTZ-2-5	0.562444	0.06815	0.00237	1.17523	0.02583	0.12504	0.00183	759.5	10.46	789.1	12.06	873.2	70.46	3.75111	13.0211	3.75111	759.5	10.46	Cai et al. (2015)
DTZ-2-6	0.467946	0.07746	0.00248	1.33441	0.02311	0.12491	0.00175	758.8	10.05	860.8	10.05	1133.2	62.41	11.8494	33.0392	11.8494	-	-	Cai et al. (2015)
DTZ-2-7	0.946943	0.06022	0.0021	0.53865	0.01178	0.06486	0.00093	405.1	5.65	437.5	7.78	611.6	73.47	7.40571	33.7639	7.40571	405.1	5.65	Cai et al. (2015)
DTZ-2-8	0.407464	0.07466	0.0024	1.83611	0.0323	0.17835	0.00253	1057.9	13.85	1058.5	11.56	1059.1	63.68	0.056684	0.113304	0.113304	1059.1	63.68	Cai et al. (2015)
DTZ-2-9	0.296932	0.08422	0.00264	1.3908	0.02252	0.11976	0.00168	729.2	9.66	885	9.56	1297.7	59.93	17.6045	43.8083	17.6045	-	-	Cai et al. (2015)
DTZ-2-10	1.08815	0.06223	0.00249	0.61981	0.01808	0.07223	0.00112	449.6	6.71	489.7	11.33	682	83.16	8.18869	34.0762	8.18869	449.6	6.71	Cai et al. (2015)
DTZ-2-11	0.496081	0.17363	0.00537	11.567	0.1799	0.48315	0.00697	2541	30.29	2570	14.54	2593	50.69	1.1284	2.0054	2.0054	2593	50.69	Cai et al. (2015)
DTZ-2-12	0.221301	0.11516	0.00358	3.27948	0.05104	0.20655	0.00292	1210.4	15.58	1476.2	12.11	1882.3	54.91	18.0057	35.6957	35.6957	-	-	Cai et al. (2015)
DTZ-2-13	2.70593	0.0765	0.00242	1.93479	0.03211	0.18343	0.00261	1085.7	14.23	1093.2	11.11	1108.3	61.89	0.686059	2.03916	2.03916	1108.3	61.89	Cai et al. (2015)
DTZ-2-14	0.68059	0.11626	0.00371	1.03321	0.01757	0.06446	0.00093	402.7	5.61	720.5	8.77	1899.5	56.29	44.1083	78.7997	44.1083	-	-	Cai et al. (2015)
DTZ-2-15	0.499173	0.14363	0.00451	5.44413	0.08854	0.27491	0.004	1565.7	20.21	1891.8	13.95	2271.4	53.13	17.2376	31.0689	31.0689	-	-	Cai et al. (2015)
DTZ-2-16	0.867617	0.06232	0.00284	0.62843	0.02278	0.07314	0.00122	455.1	7.31	495.1	14.21	685	94.47	8.07918	33.562	8.07918	455.1	7.31	Cai et al. (2015)
DTZ-2-17	0.19321	0.07622	0.00243	1.45885	0.0249	0.13882	0.002	838	11.3	913.5	10.28	1100.8	62.5	8.26492	23.8735	8.26492	838	11.3	Cai et al. (2015)
DTZ-3-1	0.718661	0.16162	0.00539	9.72158	0.18753	0.43603	0.00684	2332.8	30.71	2408.8	17.76	2472.6	55.26	3.1551	5.65397	5.65397	2472.6	55.26	Cai et al. (2015)
DTZ-3-2	0.548873	0.07275	0.00237	1.49927	0.02607	0.14939	0.0021	897.5	11.77	930.1	10.59	1007	64.82	3.505	10.8739	3.505	897.5	11.77	Cai et al. (2015)
DTZ-3-3	0.252296	0.16633	0.0056	10.8818	0.21747	0.47425	0.00764	2502.2	33.42	2513.1	18.58	2521	55.46	0.433727	0.745736	0.745736	2521	55.46	Cai et al. (2015)
DTZ-3-4	1.12719	0.16083	0.00519	10.2045	0.17533	0.45995	0.00683	2439.3	30.16	2453.5	15.89	2464.4	53.53	0.578765	1.0185	1.0185	2464.4	53.53	Cai et al. (2015)
DTZ-3-5	0.193151	0.07148	0.00242	1.2856	0.02522	0.13039	0.00187	790.1	10.67	839.3	11.21	971	67.62	5.86203	18.6303	5.86203	790.1	10.67	Cai et al. (2015)
DTZ-3-6	0.8426	0.05612	0.00232	0.56918	0.01731	0.07352	0.00112	457.3	6.71	457.5	11.2	456.9	89.43	0.0437158	-0.0875465	0.0437158	457.3	6.71	Cai et al. (2015)
DTZ-3-7	1.21079	0.098	0.00321	3.51885	0.06311	0.2603	0.00377	1491.4	19.26	1531.5	14.18	1586.4	60.09	2.61835	5.9884	5.9884	1586.4	60.09	Cai et al. (2015)
DTZ-3-8	0.788278	0.16305	0.00515	10.3421	0.16329	0.45983	0.00659	2438.8	29.1	2465.9	14.62	2487.5	52.28	1.09899	1.95779	1.95779	2487.5	52.28	Cai et al. (2015)
DTZ-3-9	0.190578	0.05885	0.00211	0.55144	0.01261	0.06793	0.00098	423.7	5.94	445.9	8.25	561.7	76.36	4.97869	24.5683	4.97869	423.7	5.94	Cai et al. (2015)
DTZ-3-10	1.28405	0.05952	0.00211	0.59445	0.01328	0.07241	0.00105	450.7	6.29	473.7	8.45	586	75.3	4.85539	23.0887	4.85539	450.7	6.29	Cai et al. (2015)
DTZ-3-11	0.34799	0.12354	0.00398	6.07655	0.1039	0.35661	0.00519	1966.1	24.65	1986.9	14.91	2007.9	56.15	1.04686	2.08178	2.08178	2007.9	56.15	Cai et al. (2015)
DTZ-3-12	2.40098	0.05886	0.00207	0.73658	0.01609	0.09073	0.00131	559.9	7.75	560.4	9.41	561.8	74.87	0.089222	0.338199	0.089222	559.9	7.75	Cai et al. (2015)
DTZ-3-13	0.242056	0.07677	0.0025	0.96001	0.01682	0.09067	0.00128	559.5	7.57	683.3	8.71	1115.2	63.66	18.118	49.8296	18.118	-	-	Cai et al. (2015)
DTZ-3-14	0.523794	0.0885	0.00307	2.77799	0.05917	0.22759	0.00343	1321.9	18.03	1349.6	15.9	1393.4	64.98	2.05246	5.13133	5.13133	1393.4	64.98	Cai et al. (2015)
DTZ-3-15	1.00289	0.05839	0.0022	0.71532	0.01834	0.08882	0.00132	548.6	7.83	547.9	10.86	544.6	80.26	-0.127761	-0.734484	-0.127761	548.6	7.83	Cai et al. (2015)
DTZ-3-16	1.03151	0.13655	0.00438	7.43356	0.12685	0.39474	0.0058	2144.8	26.83	2165	15.27	2183.9	54.81	0.933025	1.79038	1.79038	2183.9	54.81	Cai et al. (2015)
DTZ-3-17	0.900217	0.05997	0.00313	0.61046	0.02674	0.07382	0.00129	459.1	7.73	483.9	16.86	602.4	109.1	5.12503	23.7882	5.12503	459.1	7.73	Cai et al. (2015)
DTZ-3-18	0.73776	0.0566	0.00198	0.57738	0.01258	0.07397	0.00107	460	6.42	462.8	8.1	475.3	76.44	0.605013	3.21902	0.605013	460	6.42	Cai et al. (2015)
DTZ-3-19	0.89811	0.10993	0.00385	4.12617	0.09119	0.27219	0.00429	1551.9	21.74	1659.5	18.06	1798.2	62.43	6.48388	13.697	13.697	-	-	Cai et al. (2015)
DTZ-3-20	0.58739	0.05789	0.00327	0.3874	0.01886	0.04853	0.00085	305.5	5.23	332.5	13.8	525.3	119.53	8.1203	41.8428	8.1203	305.5	5.23	Cai et al. (2015)
DTZ-3-21	0.271344	0.18923	0.0059	13.2658	0.20382	0.50838	0.00729	2649.7	31.17	2698.8	14.51	2735.5	50.41	1.81933	3.13654	3.13654	2735.5	50.41	Cai et al. (2015)
DTZ-3-22	0.614945	0.06229	0.00272	0.70188	0.02365	0.08172	0.00132	506.4	7.85	539.9	14.11	684.1	90.65	6.20485	25.9757	6.20485	506.4	7.85	Cai et al. (2015)
DTZ-3-23	0.705782	0.12998	0.00412	6.70918	0.11031	0.37434	0.00543	2049.8	25.47	2073.8	14.53	2097.7	54.68	1.1573	2.28345	2.28345	2097.7	54.68	Cai et al. (2015)
DTZ-3-24	0.844447	0.16225	0.00508	9.54387	0.14883	0.4266	0.00613	2290.4	27.68	2391.8	14.33	2479.3	51.82	4.23948	7.61909	7.61909	2479.3	51.82	Cai et al. (2015)
DTZ-3-25	0.532389	0.16727	0.00544	10.3371	0.18939	0.44824	0.00696	2387.4	30.97	2465.4	16.96	2530.5	53.55	3.16379	5.65501	5.65501	2530.5	53.55	Cai et al. (2015)
DTZ-3-26	0.81248	0.08216	0.0028	2.16722	0.04464	0.19134	0.00285	1128.6	15.44	1170.6	14.31	1249.3	65.24	3.5879	9.66141	9.66141	1249.3	65.24	Cai et al. (2015)
DTZ-3-27	0.926633	0.05917	0.00227	0.66405	0.01777	0.0814	0.00124	504.5	7.36	517.1	10.84	573.5	81.25	2.43667	12.0314	2.43667	504.5	7.36	Cai et al. (2015)
[truncated: 153 more rows]

## Sheet: References
Minerals
Supplementary Material for
[Tectonic setting of the eastern margin of the Sino-Korean Block in the Upper Carboniferous: constraints from detrital zircon ages]
Mun Gi Kim, Yong Il Lee, Taejin Choi
Reference list of literature detrital zircon U-Pb age data used in this study
1. Cai, S., Wang, Q., Liu, X., Feng, Y. and Zhang, Y., 2015. Petrography and detrital zircon study of late Carboniferous sequences in the southwestern North China Craton: Implications for the regional tectonic evolution and bauxite genesis. Journal of Asian Earth Sciences, 98, 421-435. (site 22)
2. Choi, S.-J., Kim, D.-Y., Cho, D.-L. and Kim, Y.B., 2015. Detrital zircon U-Pb ages of the metapelite on the southwestern part of the Ogcheon Belt and its stratigraphical implication. The Journal of the Petrological Society of Korea, 24, 55-63 (in Korean with English abstract). (site 3)
4. Jia, L., Zhong, D., Sun., H., Yan, R., Zhang, C., Mo, W., Qiu., C., Dong., Y., Li., B. and Liao., G., 2019., Sediment Provenance Analysis and Tectonic Implication of the Benxi Formation, Ordos Basin. Acta Sedimentologica Sinica, 37, 1087-1103 (in Chinese with English abstract). (site 11, 21)
5. Kim, M.G., Lee, Y.I., Choi, T. and Orihashi, Y., 2019. The tectonic setting of the eastern margin of the Sino-Korean Block inferred from detrital zircon U–Pb age and Nd isotope composition of the Pyeongan Supergroup (late Paleozoic–Early Triassic), Korea. Geological Magazine, 156, 471-484 (site 1)
6. Kim, S.W., Park, S.-I., Jang, Y., Kwon, S., Kim, S.J. and Santosh, M., 2017. Tracking Paleozoic evolution of the South Korean Peninsula from detrital zircon records: Implications for the tectonic history of East Asia. Gondwana Research, 50, 195-215 (site 1)
7. Li, Z., Peng, S., Xu, C., Han, Y. and Zhai, M., 2009. U-Pb ages of the Paleozoic sandstone detrital zircons and their tectonic implications in the Tabeaksan basin, Korea. Acta Petrologica Sinica, 25, 182-192 (in Chinese with English abstract). (site 1)
8. Liu, J., Zhao, Y., Liu, A., Zhang, S., Yang, Z. and Zhuo, S., 2014. Origin of Late Palaeozoic bauxites in the North China Craton: constraints from zircon U–Pb geochronology and in situ Hf isotopes. Journal of the Geological Society, 171, 695-707. (site 5, 6, 8, 9, 10)
9. Ma, S., Meng, Q., Duan, L. and Wu, G., 2014a. Reconstructing Late Paleozoic exhumation history of the Inner Mongolia Highland along the northern edge of the North China Craton. Journal of Asian Earth Sciences, 87, 89-101. (site 7)
10. Wang, A., Yang, D., Yang, H., Mu, M., Quan, Y., Hao, L. and Xu, W., 2020. Late Palaeozoic tectonic evolution of the southern North China Craton: Constraints from detrital zircon dating and Hf–O isotopic compositions of the Benxi Formation, Sanmenxia area, North China Craton. Geological Journal, 55, 1320-1331. (site 20)
11. Wang, Q., Deng, J., Liu, X., Zhao, R. and Cai, S., 2016. Provenance of Late Carboniferous bauxite deposits in the North China Craton: New constraints on marginal arc construction and accretion processes. Gondwana Research, 38, 86-98. (site 4, 12, 15, 16, 17)
12. Wang, Y., Zhou, L., Zhao, L., Ji, M. and Gao, H., 2010. Palaeozoic uplands and unconformity in the North China Block: constraints from zircon LA-ICP-MS dating and geochemical analysis of Bauxite. Terra Nova, 22, 264-273. (site 13, 14, 18)
13. Zhao, L. and Liu X., 2019. Metallogenic and tectonic implications of detrital zircon U-Pb, Hf isotopes, and detrital rutile geochemistry of late carboniferous karstic bauxite on the southern margin of the North China Craton. Lithos, 350-351, 105222. (site 19)
14. This study (site 2).
* Site numbers in parenthesis refer to the studied sites in each article following the site numbers in Figure 3 and 4.
† For detrital zircon grains that are younger and older than 1000 Ma, 206Pb/238U dates and 207Pb/206Pb dates were used for interpretation, respectively. Note that consistent discordance cut (rejection of ages with normal or reverse discordance>10%) has been applied to each analysis for accurate comparison.
